# Supplementary material
Source: PubMed Central journal article supplement (PMC10082359)
Supplement: BLOOD_BLD-2022-015414-mmc1.pdf [file BLOOD_BLD-2022-015414-mmc1.pdf]

# Supplementary Information

## Endothelial-leukemia interactions modulate drug responses and underline T-ALL vulnerabilities

This file includes:

- Supplementary Methods,
- Supplementary Figures S1-S6,
- Supplementary Figure Legends,
- Supplementary References,
- Supplementary Tables

### Supplementary Materials and Methods

#### PDX generation

To generate patient-derived tumor xenograft (PDX), primary T-ALL cells were injected in 4-6-week-old (male/female ratio: 1:1) NOD.Cg-B2mtm1Unc Prkdcscid Il2rgtm1Wjl/SzJ (NSG B2m) mice via intravenous (iv;  $1 \times 10^6$ , 100  $\mu$ L of DPBS), intra-bone ( $2 \times 10^6$ , 50  $\mu$ L of DPBS), or subcutaneous (s.c.;  $6 \times 10^6$ , 200  $\mu$ L DPBS-50% Matrigel) routes. All routes were successful, with intrabone and i.v. displaying similar rapid times of engraftment; s.c. required a longer first engraftment time. In the last stages of tumor growth, distant dissemination to parenchymal and hematopoietic tissues occurred (i.e., spleen, bone marrow etc.). Engraftment was monitored every 2 weeks by total body MRI or multicolor flow cytometry on peripheral blood. Mice were sacrificed when lymphoblastic cells represented  $\geq 50\%$  of the total circulating blood cells. Leukemic cells were harvested from the spleen or femoral bone and then cryopreserved and/or used for *ex-vivo* experiments. Serial passages were obtained by i.v. injection ( $1 \times 10^6$ , 100  $\mu$ L of DPBS) of freshly isolated leukemic cells (from the spleen). The nomenclature used for PDX passaged tumors was T1 (first generation), T2 (second generation) T3 (third generation), etc., corresponding to serial passaging in vivo. All tissues were collected for histology and immunohistochemistry. Animal studies were approved by Weill Cornell Medicine Animal Care and Use Committee (2014-0024).

#### Histology and Immunohistochemistry (IHC)

Tissues were recovered, fixed in 10% neutral buffered formalin or 4% paraformaldehyde overnight at 4°C, and processed routinely for histology and histochemistry. Immunohistochemical stains were processed using a semi-automated unit (Leica) with the following antibodies: TdT (Leica, SEN28), CD3 (Thermo Scientific, SP7), Notch1, and pSTAT5 (Cell Signaling Technology, 3608 and 9314).

#### Antibodies for flow cytometry

Flow cytometry was performed as described previously<sup>1</sup> using dedicated instrumentations (BD™ LSR II flow cytometer and BD FACSCelesta™) and high-speed sorting (BD™ Aria). The following antibodies were used: hCD45 (V500C, cat. no: 647450, 2.5  $\mu$ g/mL), hCD7 (PE, cat. no: 340656, 2.5  $\mu$ g/mL), hCD3 (PerCP, cat. no: 340663, 2.5  $\mu$ g/mL), and hCD34 (APC, cat. no: 340667, 2.5  $\mu$ g/mL) purchased from BD Biosciences; and mCD45 (PECy7, cat. no: 103114, 3  $\mu$ g/mL), hCD45 (Pacific Blue, cat. no: 368539, 3  $\mu$ g/mL), mPodoplanin (PE/Cy7, cat. no: 127412; 3  $\mu$ g/mL), and hCD31 (Pacific Blue, cat. no: 303114; PECy7, cat. no: 303118; 3  $\mu$ g/mL) from BioLegend and eBioscience (APC, cat. no: 17-0319-42, 3  $\mu$ g/mL). Leukemia cells were identified by flow cytometry after gating on human CD45+ cells, whereas human and mouse ECs were identified using specific antibodies against CD31 antigens. E4-EC or T-ALL cells were labelled with vital dyes (488 Green or 415/516 violet BioTracker) following the manufacturer's instructions (Millipore/Sigma).

#### Western blotting

T-ALL cell lines were plated at a density of  $5 \times 10^5$ /mL and stimulated for 30 min with IL-12 (10 ng/mL), IL-7 (10 ng/mL), IL-15 (25 ng/mL), IL-6 (10 ng/mL), or SDF1 $\alpha$  (100 ng/mL). T-ALL cells from the spleens of engrafted mice were cultured in RPMI media supplemented with the cocktail of interleukins and treated for 24 h with 1  $\mu$ M Ruxolitinib. Total cell lysates were blotted with the following primary antibodies: anti-pSTAT5 (1:1000/1:2000), anti-STAT5 (1:1000/1:5000), anti-phosphoSTAT3 (1:1000/1:2000), anti-STAT3 (1:1000/1:5000), and anti-pJAK2 (1:1000/1:2000). All antibodies were purchased from Cell Signaling Technology.

### **Isolation of ECs from primary tumors, normal tissue, and mouse embryos**

Mouse adult, embryonic, and tumoral tissues were finely dry minced using sterile blades and enzymatically digested using the digestion media as previously described<sup>2</sup>.

### **Isolation of T-ALL cells from the spleen**

Human T-ALL cells were collected from engrafted PDX spleens, passed through 100- $\mu$ m filters, and washed in PBS. Pellets were treated with red blood cell lysis buffer (BD Biosciences), and then human CD45<sup>+</sup> cells were isolated using MACS MicroBead Technology (Miltenyi Biotec). Cell suspensions were analyzed by flow cytometry using a panel of monoclonal antibodies.

### **Isolation of ECs from primary tumors, normal tissue, and mouse embryos**

Mouse adult, embryonic, and tumoral tissues were finely dry minced using sterile blades and enzymatically digested using a digestion media [Collagenase A (25 mg/ml) (Roche, 2599323), Dispase II (25 mg/ml) (Sigma- Aldrich, d4993-1G), DNase (250 mg/ml or 500 units) (Roche, 4716728001) in a 140 mM NaCl (Sigma), 5 mM KCl (Sigma), 2 mM CaCl<sub>2</sub> (Sigma), 1.3 mM MgCl<sub>2</sub> (Sigma), 2.5 mM Phosphate Buffer pH 7.4, 10 mM HEPES (Sigma) medium] reconstituted in RPMI1640 with a 3:1 ratio for 30 minutes at 37°C. Digested tissues were passed through 70- $\mu$ m nylon filters and cell suspensions were washed twice with PBS. Isolated cells were labelled with fluorescent antibodies, and enriched non-lymphatic ECs (CD31+, CD45-, Podoplanin-) were sorted (BD™ FACS Aria cell sorter).

### **Cell culture, inhibitors, and stimulating factors**

Human umbilical vein endothelial cells transduced with E4-ORF1 gene (VeraVec EC; Angiocrine Bioscience), namely E4-ECs, were cultured in *ex vivo* media (composition: 199 Hyclone medium with 50  $\mu$ g/mL heparin [Sigma], 20 ng/mL FGF-2 [Peprotech], antibiotic-antimycotic [Invitrogen], normocin [InvivoGen], 10 mM HEPES [Invitrogen], Glutamax [Life Technologies]) supplemented with 10% FCS (Lonza) and maintained at 37°C in a humidified 5% CO<sub>2</sub> atmosphere. PDX-derived T-ALL cells were cultured in RPMI with 10% FCS or SS™ (StemCell Technologies) supplemented with 10% knock-out Serum Replacement (KSR; Life Technologies), 100 U/mL penicillin, 100  $\mu$ g/mL streptomycin, and a cocktail of interleukins (IL2, IL6, IL7, IL12, and IL15) based on the expression of lymphokine receptors of T-ALL PDX. KSR is an FCS-free medium supplement that supports the growth of cultured pluripotent stem cells (PSCs). Human recombinant IL-12 (10 ng/mL), IL-7 (10 ng/mL), IL15 (25 ng/mL), IL-6 (10 ng/mL) SDF1 $\alpha$  (100 ng/mL), and Jagged-1 (50 ng/mL) were purchased from R&D Systems.

For the 96- and 384-well drug screening, all compounds were tested at a concentration of 1.0  $\mu$ M unless differently specified (dose-response experiments). All compounds were purchased from Selleckchem.

### **High-throughput drug screening**

The drug-screening library, composed of 433 targeted-compounds, was purchased from SelleckChem and consists of a subset of SelleckChem's "Targeted Selective inhibitory Library". Drugs were selected based on current clinical applications (FDA-approved), selectivity (target of canonical signaling pathways [JAK/STAT, RAS/ERK, PI3K/AKT, B-catenin., epigenetic, anti-apoptotic etc.]), and redundancy (multiple drugs targeting the same pathways). Collectively, 634 proteins were targeted. Drug screening plates were prepared at a concentration of 1  $\mu$ M, spanning 2  $\times$  384-well plates using

Tecan Freedom EVO 150 (Tecan, CH) in the High-Throughput and Spectroscopy facility at Rockefeller University. Approximately 33,000 cells derived from PDX models were added per well in a total volume of 50  $\mu$ L (drug solution + cells) and incubated at 37°C for 72 h. After drug incubation, cell viability was evaluated based on luminescence of CTG-tagged ATP (CellTiter-Glo™ kit; Promega) and assessed using a plate reader (Synergy 4, Biotek); data were processed, analyzed, and plotted using Matlab (Mathworks, MA).

To determine compound activity, each data point was normalized to its corresponding in-plate vehicle control (16 wells of vehicle control per plate) and then linearized to transform the response-matrix (16 $\times$ 33) into a 433 $\times$ 1 drug-response vector. To assess the degree of concordance, sample-replicates were plotted against each other and the correlation, coefficient of variance, and standard error were computed for each compound to determine the reproducibility. To further test reproducibility, we used a representative sample with four replicates and randomized permutation analysis. In this analysis, from a total of four replicates, we computed all possible combinations of 2, 3, or 4 samples. For this method, we computed the overlap in distributions, the average number of active compounds (having <50% viability), and coefficient of variance to determine the degree of concordance; p-values were assessed using one-way ANOVA.

The groupings of the samples' response profiles and drug groupings across all samples were evaluated using unsupervised hierarchical clustering along the axis of maximum variation (ward) of Euclidean distances. Samples and compounds were reordered and illustrated using color-coded heatmaps and dendrogram trees, with the branches delineating groups. Hierarchical clustering analysis was further confirmed using PCA, yielding similar conclusions based on the analyses. Active compounds that reduced viability, as assessed by a reduction in ATP content relative to vehicle controls, were determined in each column within the 433 $\times$ n matrix and compared among samples. Compounds that induced  $\leq$ 50% viability among all replicates were considered active and selected for further comparison and analysis. Data shown in the heatmaps denote the average viability across samples.

To evaluate differences in sample responses cultured in the two media types, we computed the differential (viability in condition 1 – viability in condition 2) and deviation scores. Briefly, the standard deviation and mean were computed across the two conditions and the ratio of the standard deviation versus the means was computed. The deviation score is informative since it allows compounds that are different and active to be identified. For example, if a drug induces a viability of 1.5 and 1.2 in two samples and another drug induces a viability of 0.4 and 0.1 in the same two samples, both will yield a differential of 0.3. However, based on the deviation score, one can preferentially highlight the difference in the active drug (with lower viabilities), (i.e., Deviation score = 0.22 vs. 1.2, respectively).

### **Pathway enrichment analysis in differential drug targets**

Differentially active drugs based on underlying genetic profiles were identified based on the deviation score (>3) and differential. From drugs identified as differentially active, 77 drugs were more active in R05/R06 compared with 29 in 3053/3119. The list of drugs in both cases was compiled and the list of targets corresponding to each drug was imported into Cytoscape; ClueGO was used to assess pathway enrichments using GO: biological processes with a significance cutoff of  $p \leq 0.05$ . Network maps were constructed, with each node (color) representing a sub-pathway within the main pathways and gray lines highlighting the connections among nodes. Note, the length of the connecting links has no significance, and nodes with multiple colors denote shared underlying genes.

### **Co-culture with ECs**

For co-culture experiments under stress conditions, T-ALL cell lines were grown at a density of  $2 \times 10^5$ /mL in serum/cytokine-free media (here referred to as *ex-vivo* media), whereas PDX-derived T-ALL cells were cultured at  $5 \times 10^5$ /mL in RPMI with or without 10% FCS, alone or in co-culture with ECs ( $8 \times 10^4$  per well in a 24-well plate). Cell viability was determined by Trypan blue exclusion count. Cytotoxicity was assessed by flow cytometric evaluation of Annexin V/7AAD staining (PE AnnexinV Apoptosis detection kit I, BD). A total of 20,000 events were acquired by flow cytometry per sample.

### **Co-culture drug screening**

For drug screening in co-culture, the following conditions were applied: ECs were stained with CFSE (1  $\mu$ M; Invitrogen), plated, and cultured overnight in 96-well plates (13,000 cells/well). On day 0, mice were sacrificed and T-ALL cells were harvested from the spleen. Enriched leukemic cells were stained with Cell Tracer Violet (1  $\mu$ M, Invitrogen), washed, and plated (83,000 cells/well) in 96-well plates alone or on stromal/E4-EC elements and challenged with the drug library (1  $\mu$ M) in duplicate/triplicate. On selected samples, IGFBP-7 was added to the culture media at a final concentration of 0.5  $\mu$ g/mL. At 72 hours, cells were collected (using Accutase following the manufacturer's recommendation [Stemcell Technologies]) and stained with propidium iodide (Sigma). E4-EC and T-ALL cell viability was assessed by high-throughput flow cytometry (BD). At least 10,000 events were recorded per well. Flow data were analyzed by FCS Express 6 (De Novo Software) and Prism 8 (GraphPad).

### **Total RNAseq**

Total RNA was extracted from primary and PDX cells using Trizol and a cDNA total library was generated using the TruSeq-Stranded Total RNA Sample Preparation HS protocol (Illumina). The library was sized and quantified using DNA1000 kit (Agilent) on an Agilent 2100 Bioanalyzer according to the manufacturer's instructions. Paired-end RNA-sequencing at read lengths of 100 bp was performed with HiSeq2500 (Illumina). A total of about 268 million paired-end reads were generated, corresponding to ~27 billion bases. All reads were independently aligned with STAR\_2.4.0f1 for sequence alignment against the human genome build hg19, downloaded via the UCSC genome browser, and SAMTOOLS v0.1.19 was used for sorting and indexing reads. Cufflinks (2.0.2) was used to obtain the expression values (FPKMS) with Gencode v19 GTF for annotation. Cytoscape\_v3.0 software was used to visualize the network hubs and perform connectivity score calculations. For fusion analysis, STAR-fusion (STAR-Fusion\_v0.5.1) and Fusioncatcher (v0.99.3e) were used. Fusions with significant support of junction reads and spanning pairs were then selected and reviewed manually. DEseq package in R was used for differential expression analysis. A Wald test was applied for mRNA differential analysis, followed by Benjamini-Hochberg correction for multiple hypothesis testing. Genes with adjusted p-value  $\leq 0.05$  were considered statistically significant. For pathway activation, Gene Set Enrichment Analysis (GSEA)<sup>3,4</sup> was used on pre-ranked gene list, with rank defined as the signed p-value (i.e., minus base-10 logarithm of the p-value multiplied by the sign of the based-2 logarithm of the FPKM fold-change between two different conditions). Gene sets with  $p \leq 0.05$  and  $FDR \leq 0.1$  were considered significantly enriched. Rnaseqmut was used to detect mutations (<https://github.com/davidliwei/rnaseqmut>). VAF was calculated based on reference reads and alternate reads from the output generated by rnaseqmut.

### **Real-time PCR**

The primers used for *SMCHD1/JAK2* fusion validation in real-time PCR were the following: forward-TCAGGACTGGGTTTAATTTTACTG and reverse- CCAGGGCACCTATCCTCATA.

### **Single-cell RNA-seq, data processing, cell type classification, and clustering**

Single cell preparations from freshly isolated leukemic tissue samples (spleen) underwent Ficoll density gradient separation, PBS washes, and cell counts (>90% viable). The standard 10x Genomics Chromium v.2 protocol was carried out according to manufacturer's recommendations (10x Genomics, Pleasanton, CA). A total of 1000–3000 cells per sample were processed using Cell Ranger version 2.1.0 with default parameters. Reads from *in vitro* experiments were aligned to the human reference sequence hg19. Reads from the PDX spleen were additionally aligned to the mouse reference sequence mm10. Downstream analysis was performed using Seurat package (version 3.2.2) in R (Butler et al., 2018). Low-quality cells (i.e., cells with >200 or <5000 unique molecular identifiers (UMIs) per cell and cells with >10% mitochondrial gene percentage) were removed. Doublets were identified using DoubletFinder<sup>5</sup> and removed. Normalization, variance stabilization, and integration were



performed using SCTransform workflow <sup>6</sup>. The, PCA and graph-based clustering were performed. Uniform manifold approximation and projection (UMAP) dimensionality reduction was used to visualize cell clusters. Cells were then annotated using SingleR package <sup>7</sup>, which performs reference-based cell annotation. Two cell-type reference datasets from celldex package <sup>7</sup> were utilized for cell annotation: the human primary cell atlas <sup>8</sup> and the Blueprint/ENCODE reference <sup>9</sup>. We further validated cell annotations using known markers for ECs (e.g., VWF) and T-ALL cells (e.g., CD3D).

Cluster markers and differentially expressed genes were identified by a Wilcoxon Rank Sum test in Seurat's method FindMarkers. GSEA was performed to detect enriched gene-sets in cell clusters and educated cells using fgsea package (<https://www.biorxiv.org/content/10.1101/060012v2>). Pathway activity was evaluated from gene expression data using PROGENy package <sup>10</sup>.

Education signature of T-ALL cells was calculated using AddModuleScore method in Seurat based on the most differentially expressed genes in 3119 and RO2 co-cultured samples versus alone. Cellular gene expression heterogeneity (i.e., gene expression entropy) was calculated using SLICE <sup>11</sup> to assess the patterns of expression and level of differentiation for each cell. Cell-cell interactions were evaluated with CellPhoneDB <sup>12</sup> via ligand-receptor combined expression.

### ***In vivo* treatment**

Mice were injected intravenously with  $1 \times 10^6$  T-ALL cells and engraftment was monitored by flow cytometric analysis of peripheral blood mononuclear cells using antibodies against human T-cells. When human T-cells reached 5% of the total, male and female (ratio 1:1) mice were randomized into untreated (vehicle) and treated arms. Numbers, age and gender of the mice were equally distributed among arms. Compounds were administered as follows: irinotecan (20 mg/kg/day i.p. weekend off, Selleckchem), ruxolitinib (in food, Incyte), tofacitinib (80 mg/kg/day i.p., weekend off, Selleckchem), bortezomib (0.5 mg/kg/day i.p., weekend off, Selleckchem), panobinostat (5 mg/kg/day i.p., weekend off, Selleckchem) daunorubicin (1.2 mg/kg for three consecutive days/week, Selleckchem) and OSI-906 (linsitinib) (50 mg/kg/day oral gavage, weekend off, Selleckchem). Tumor burden was monitored by flow cytometric analysis of peripheral blood or using spleen measurements from total body MRI or measurement of spleen size. Survival curves were estimated using the Kaplan-Meier method. Bodyweight was used as a surrogate for drug toxicity.

### **Total body MRI**

MRI images were acquired on a 1-Tesla Aspect M3 MRI System (Aspect Magnet Technologies Ltd., Netanya, Israel). Mice were anesthetized with isoflurane (Isothesia) and placed in a supine position in a solenoid Tx/Rx coil with an inner diameter of 30 mm. Breath was monitored constantly using a respiratory probe (SAIL Instruments, Stony Brook, NY). To assess spleen dimensions, coronal-T2w anatomical images were acquired with a Fast Spin Echo sequence (TR, 6000 s; TE, 40 ms; number of slices, 20; slice thickness, 1 mm; FOV, 90 mm; matrix, 256 × 256; NEX, 4; acquisition time, 3 min 48 sec). The spleen volumes were calculated on T2w-images by drawing a region of interest (ROI) with ITK-SNAP software (<http://www.itksnap.org/pmwiki/pmwiki.php>) and tabulated using GraphPad Prism 5 (GraphPad Inc).

### **Mathematical equations**

To compute the Shannon entropies, we first computed the fractional cell killing for each of the 39 compounds per PDX line, then used the following equation:

$$S = - \sum_1^{39} pi. \ln (pi)$$

Where pi is the fractional cell death per compound for each PDX line, and S is the Shannon entropy.

Figure S1

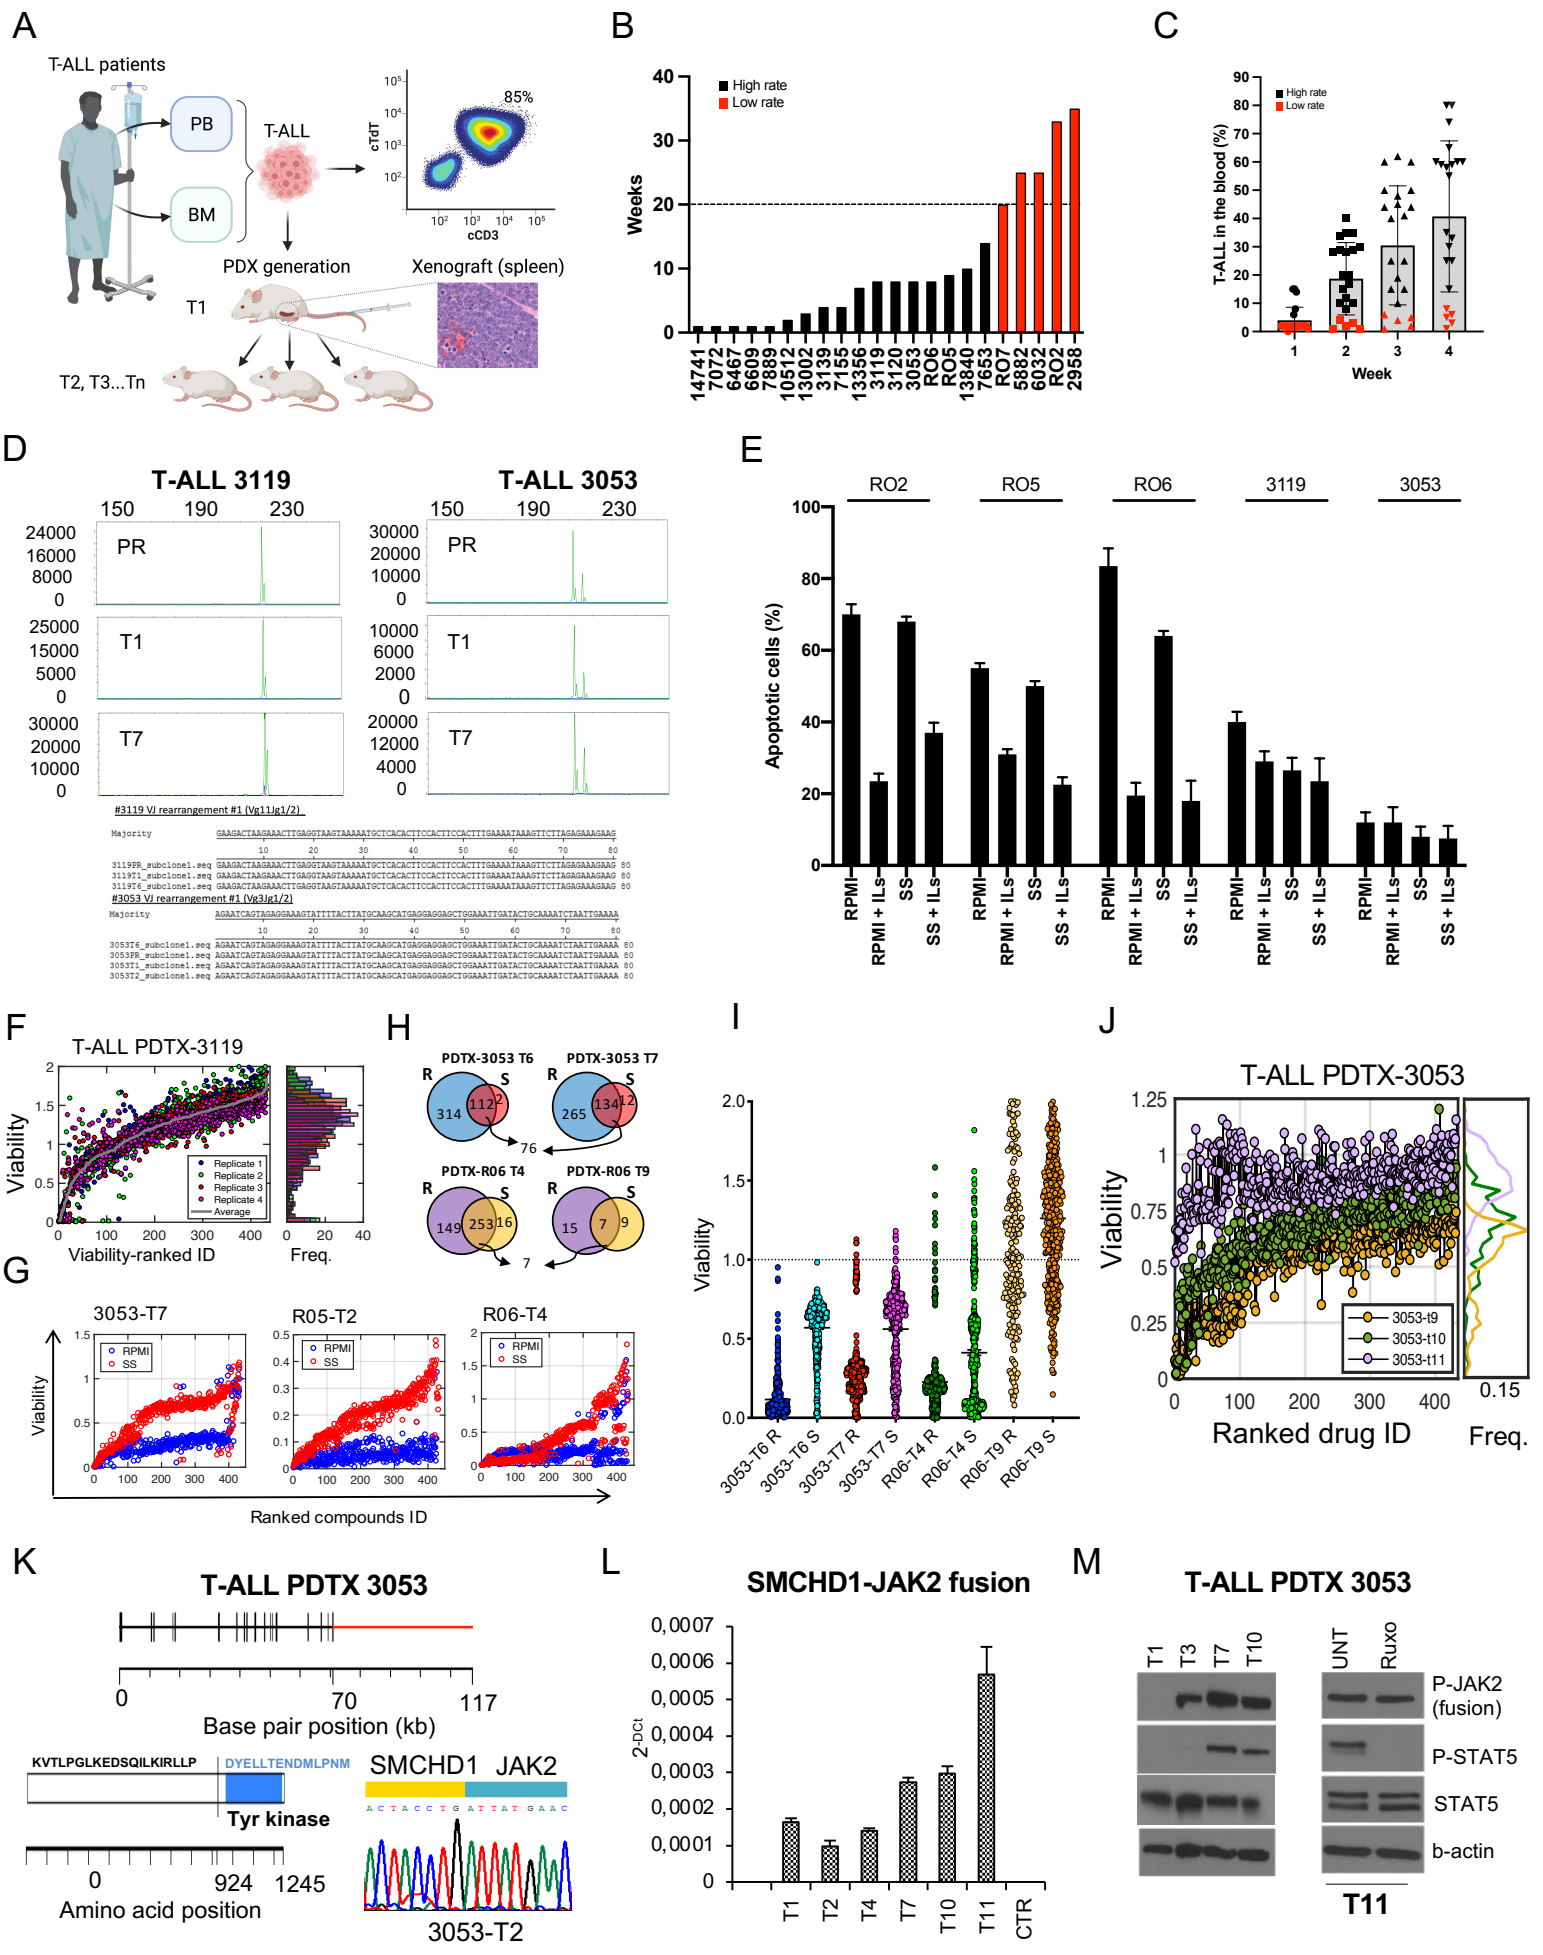

Figure S1

N

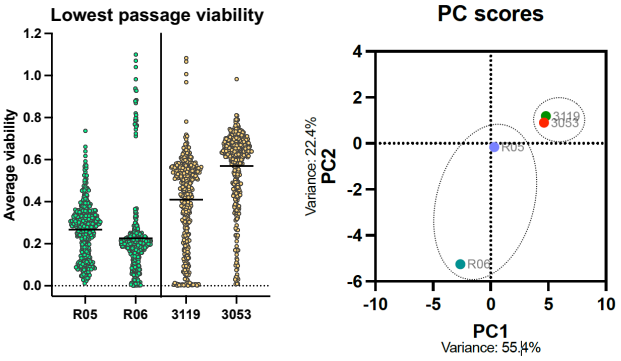

O

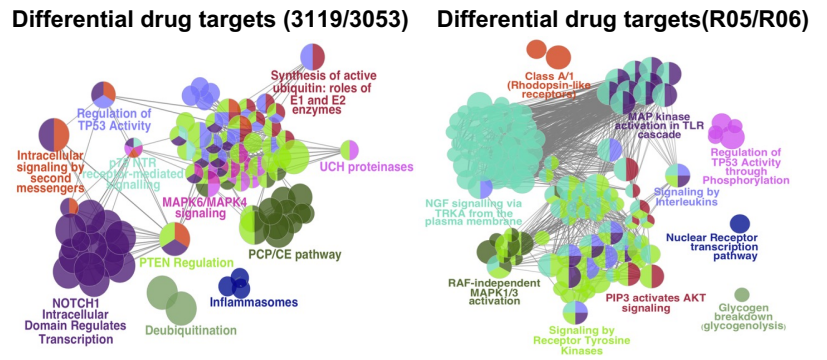

P

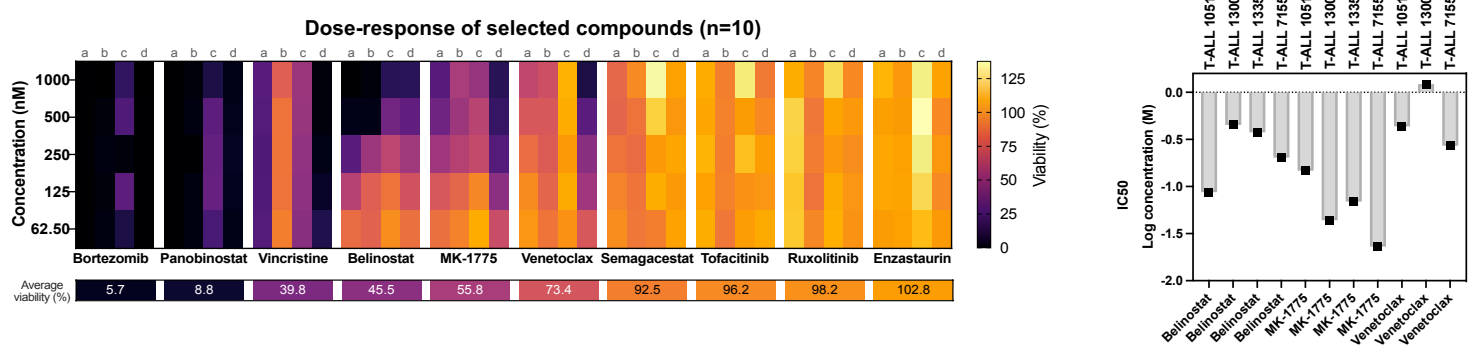

Q

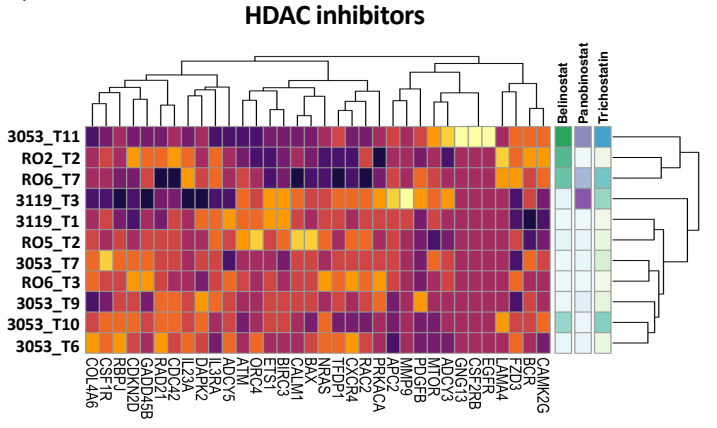

R

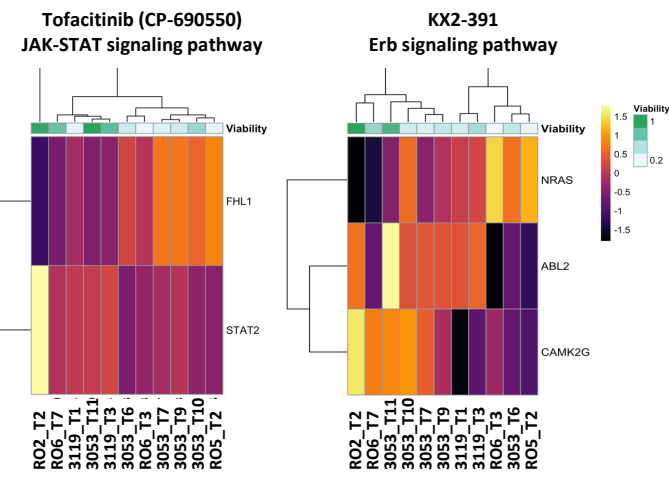

Figure S2

A

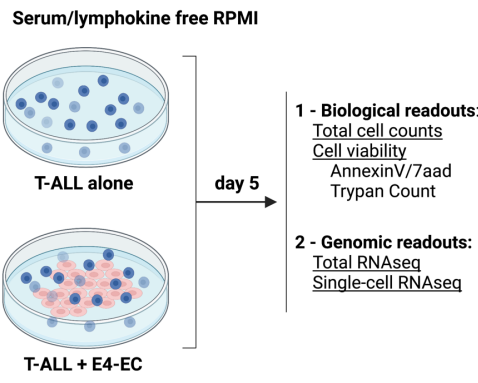

B

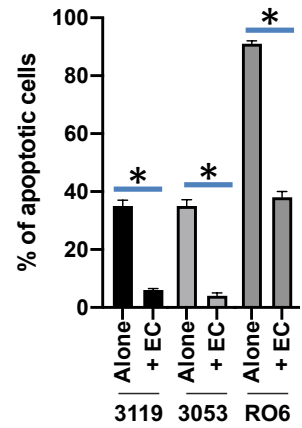

C

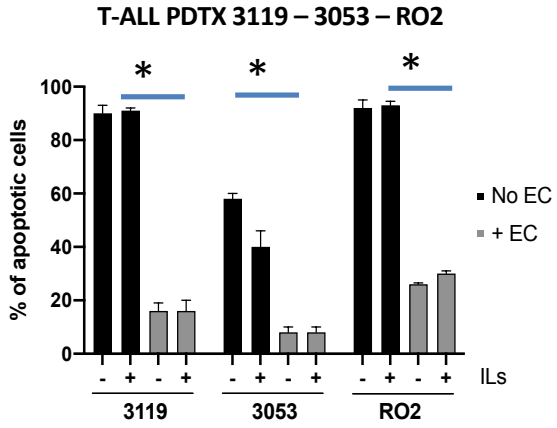

D

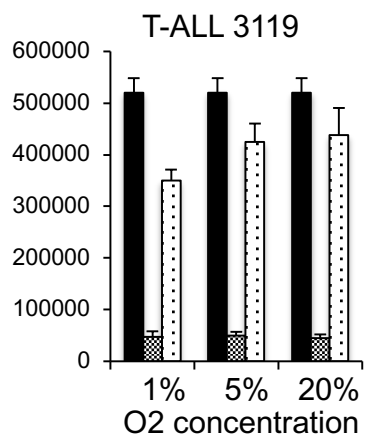

E

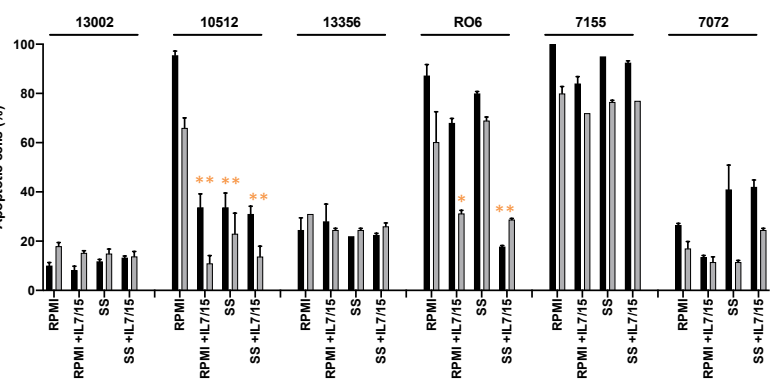

F

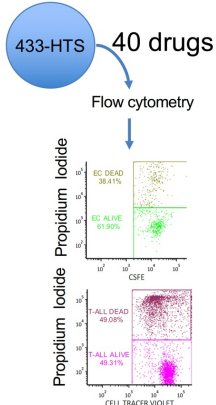

G

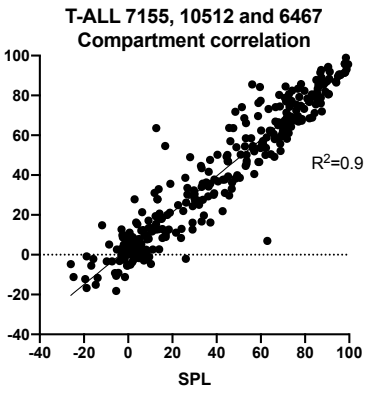

H

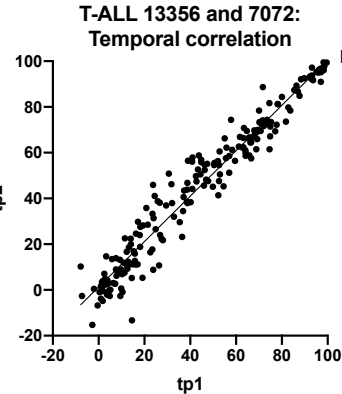

I

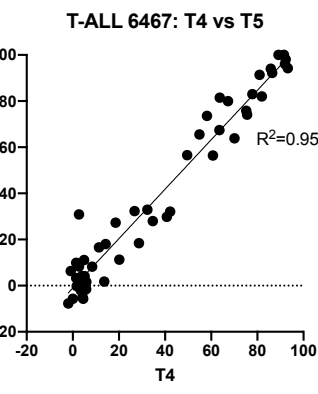

J

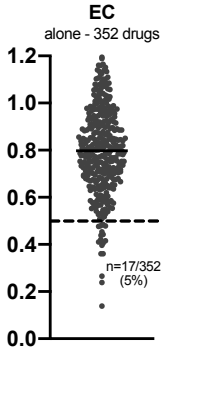

K

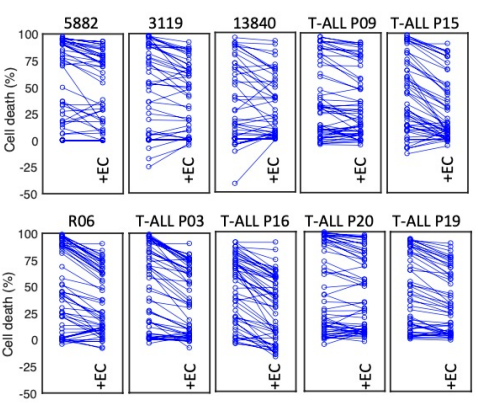

L

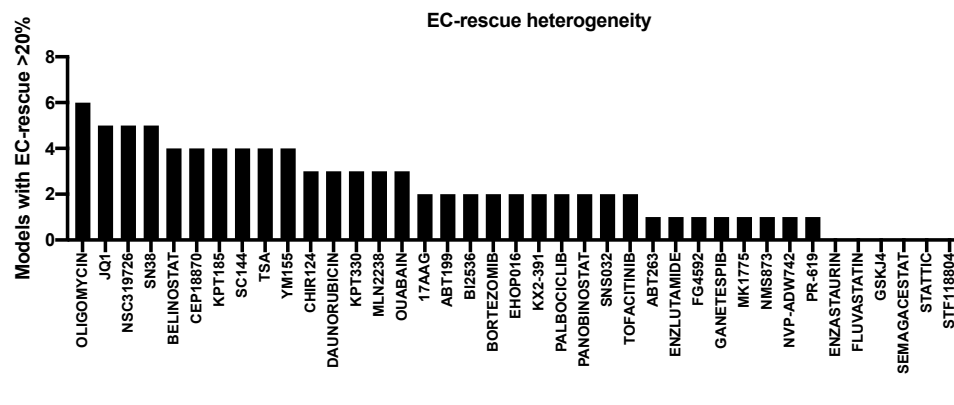

Figure S2

**M Rescued drugs enriched pathways:**

- PI3K-Akt
- P53
- FoxO
- JAK-STAT
- NOD-like-Rec
- HIF-1

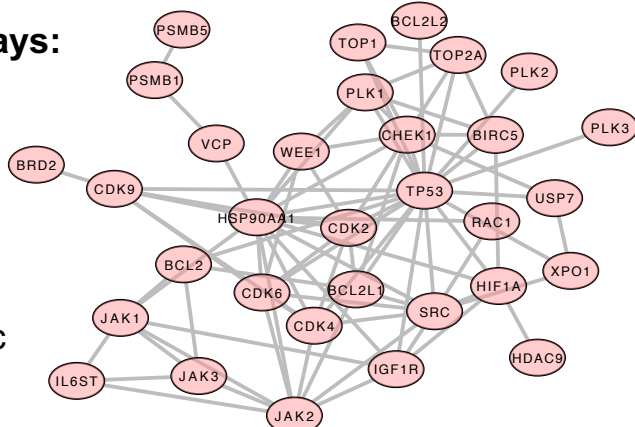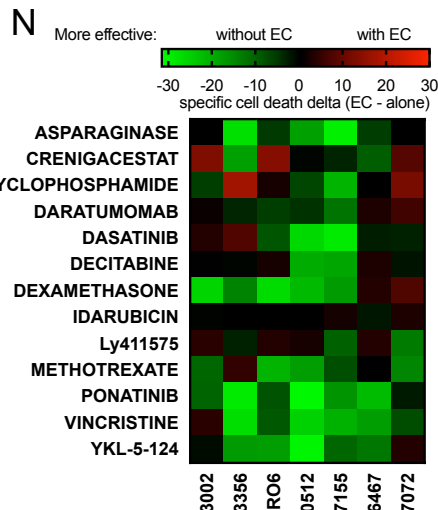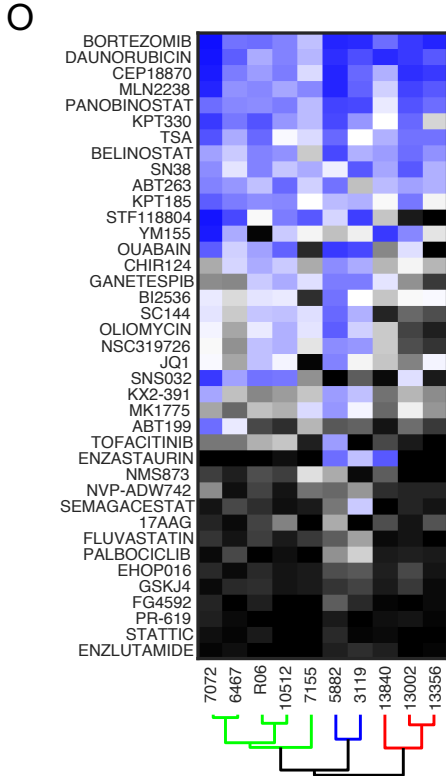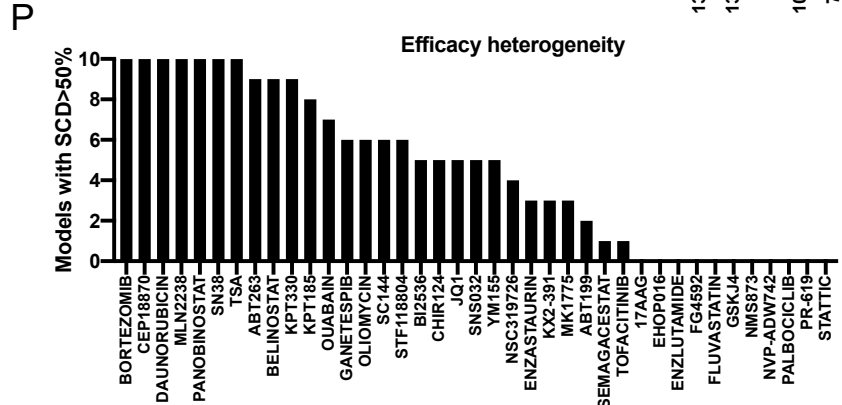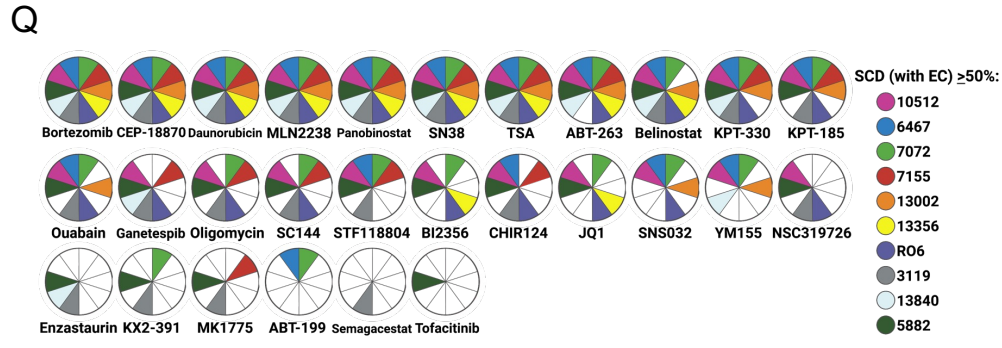

**R ETP-ALL specifically inactive drugs (targeted pathways):**

- PI3K-Akt
- JAK-STAT

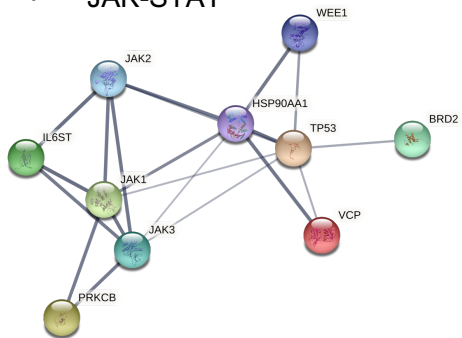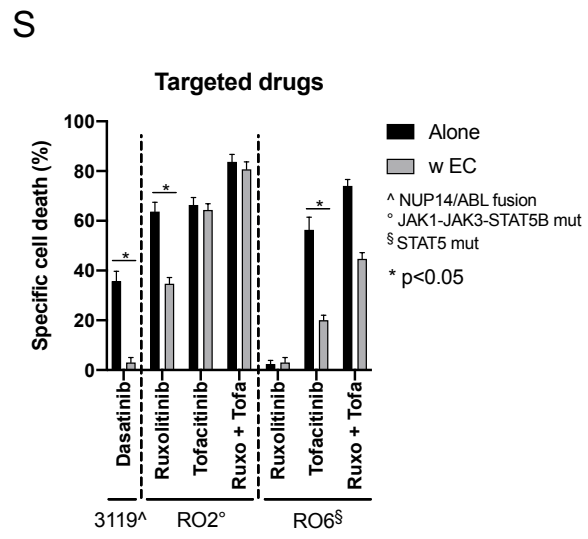



Figure S3

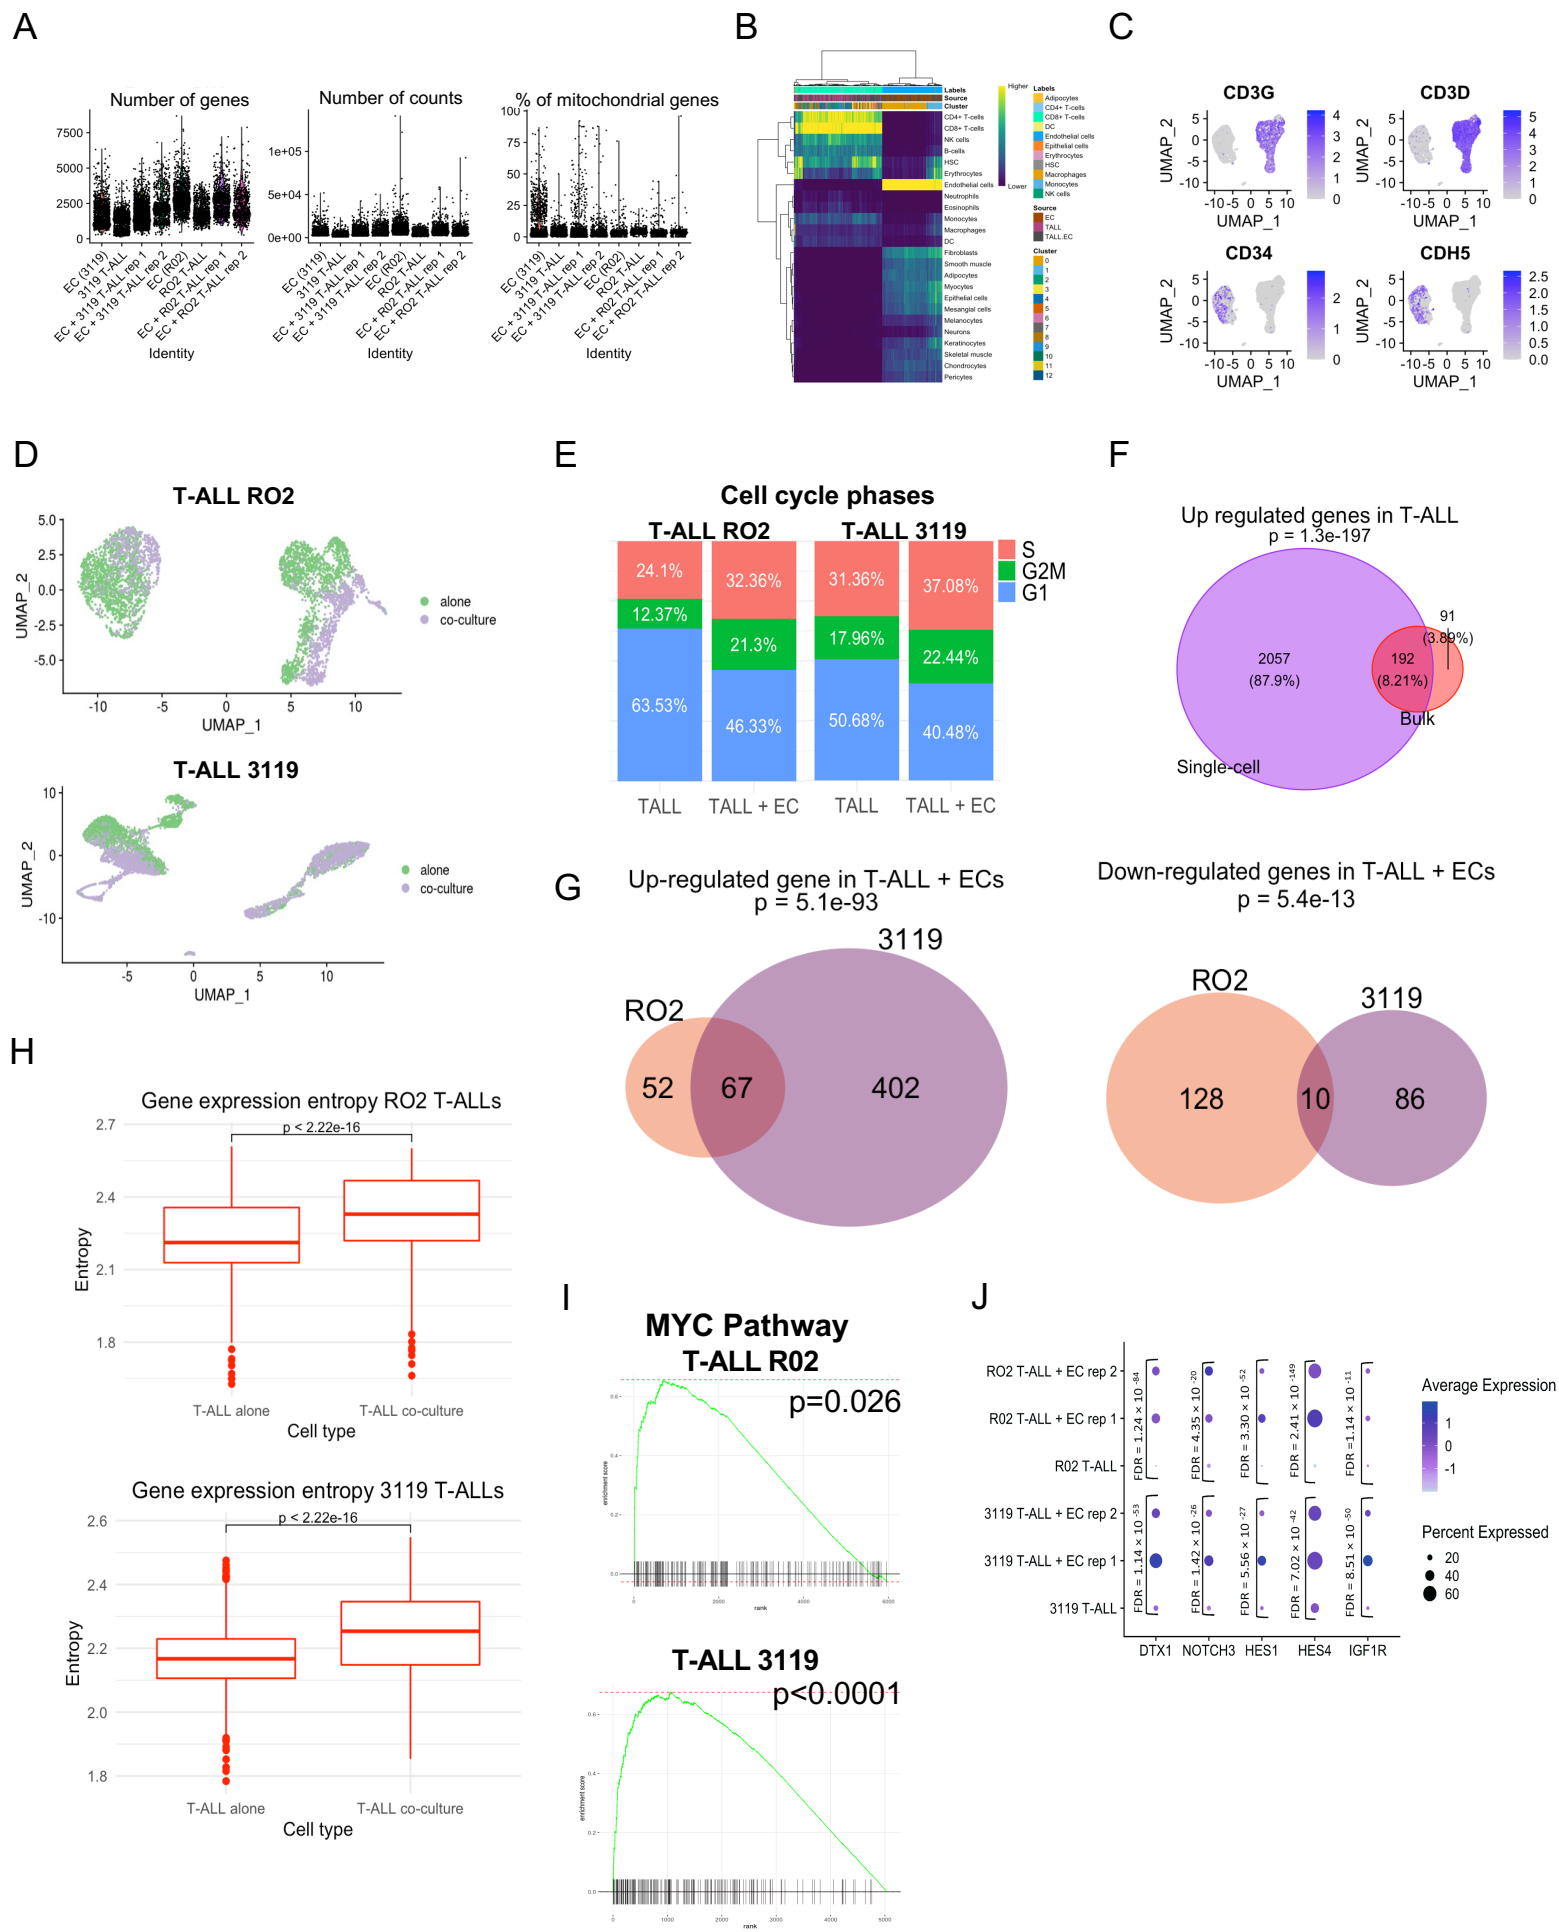

Figure S4

A

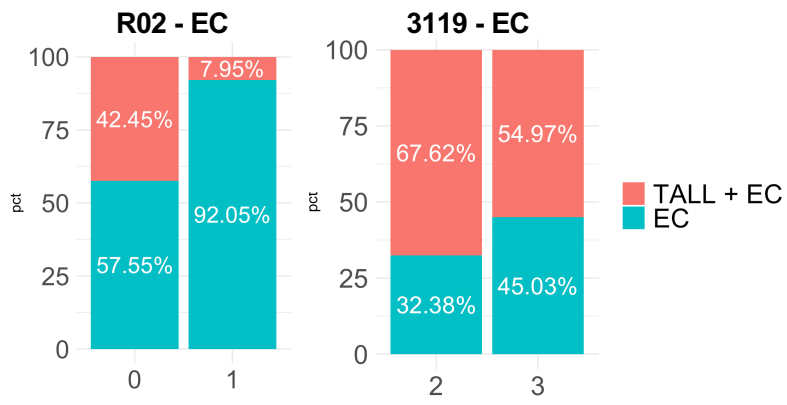

B

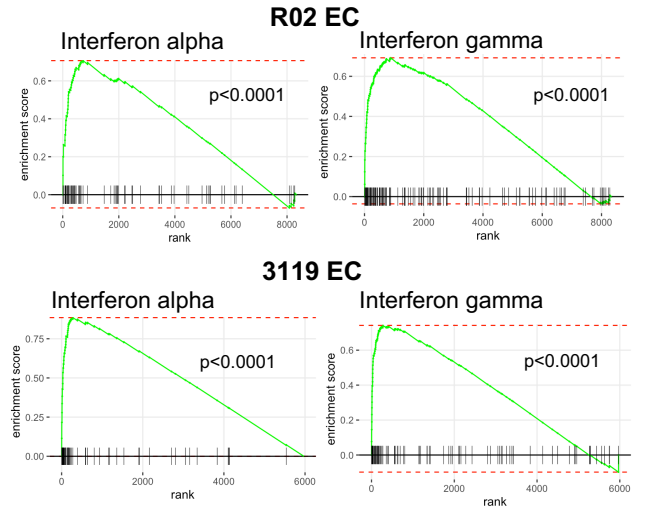

C

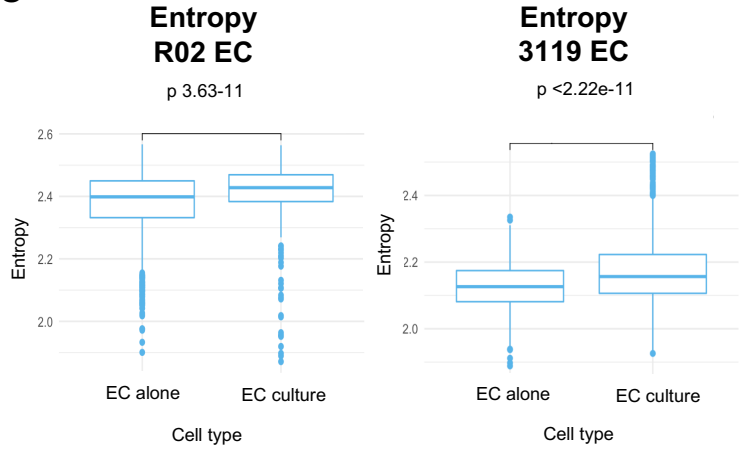

D

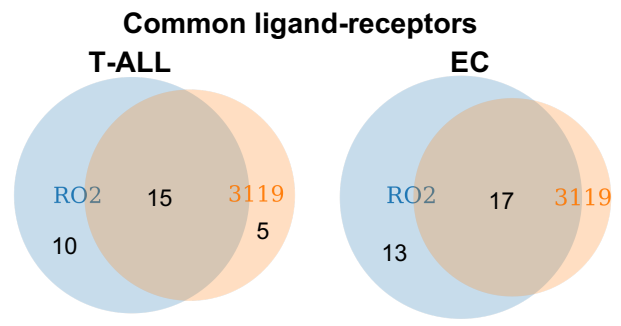

E

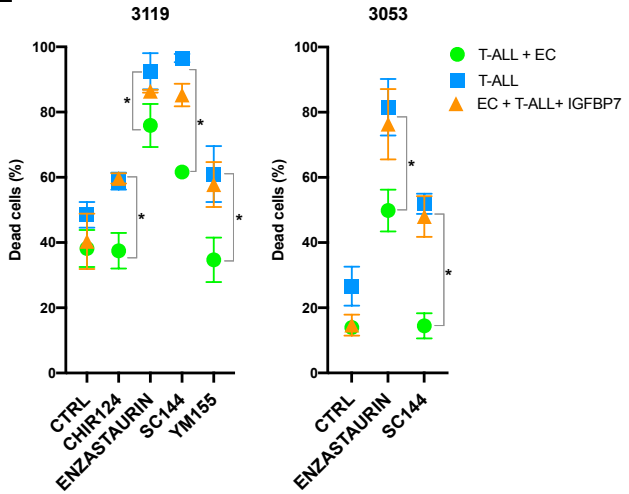

F

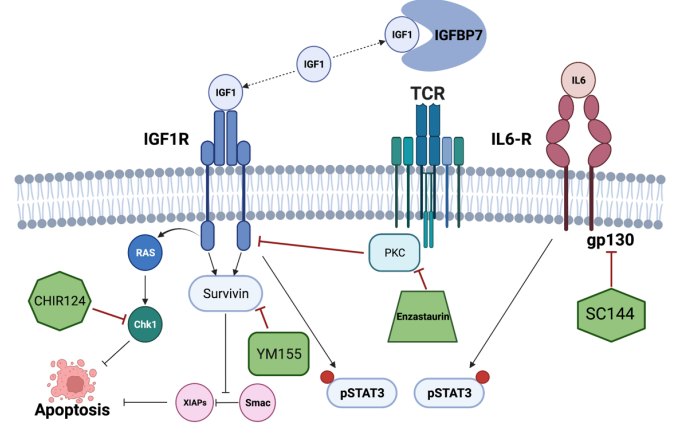

G

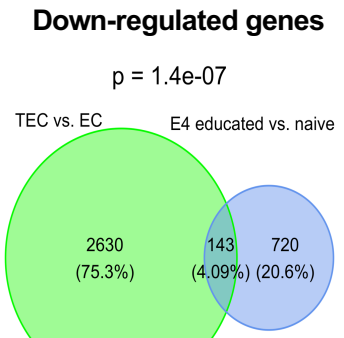

H

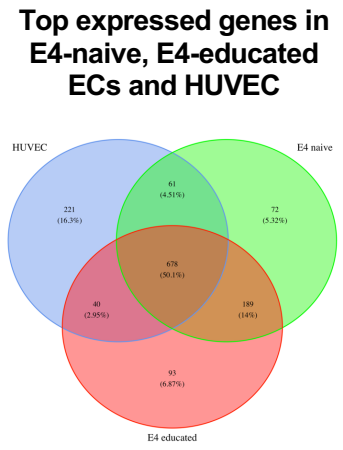

I

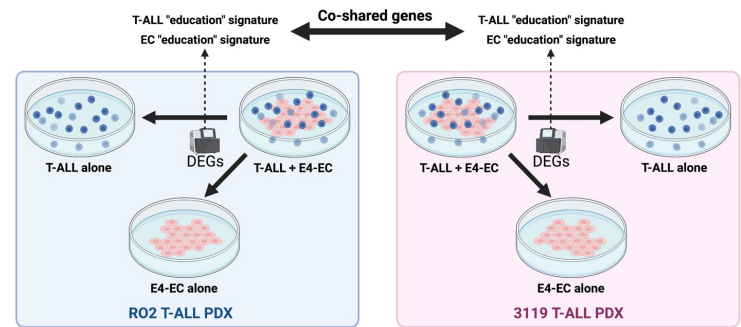

Figure S5

**A** 3119 PDX spleen

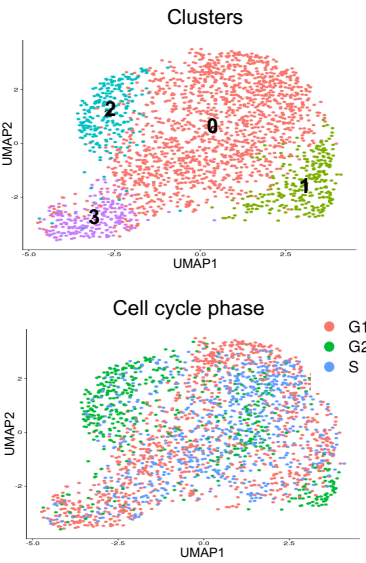

**B** 3119 PDX spleen

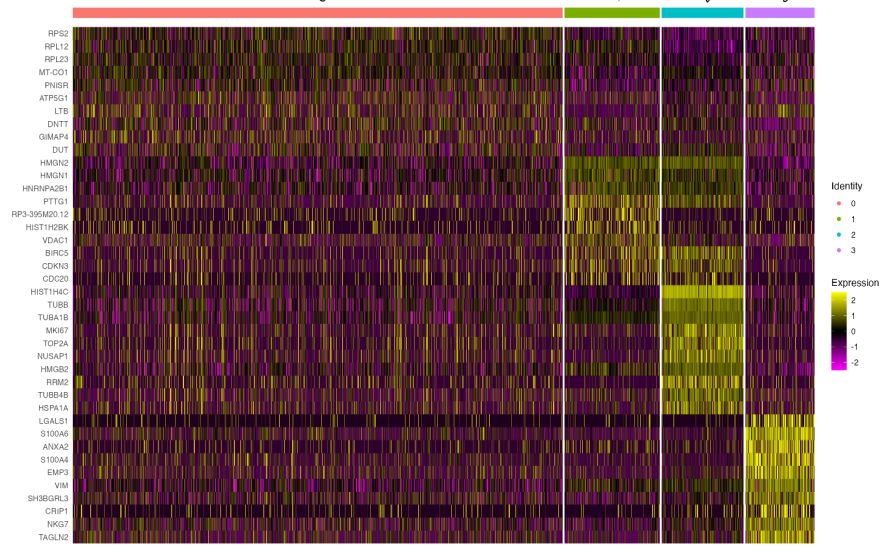

**C** 3119 PDX spleen: ssGSEA

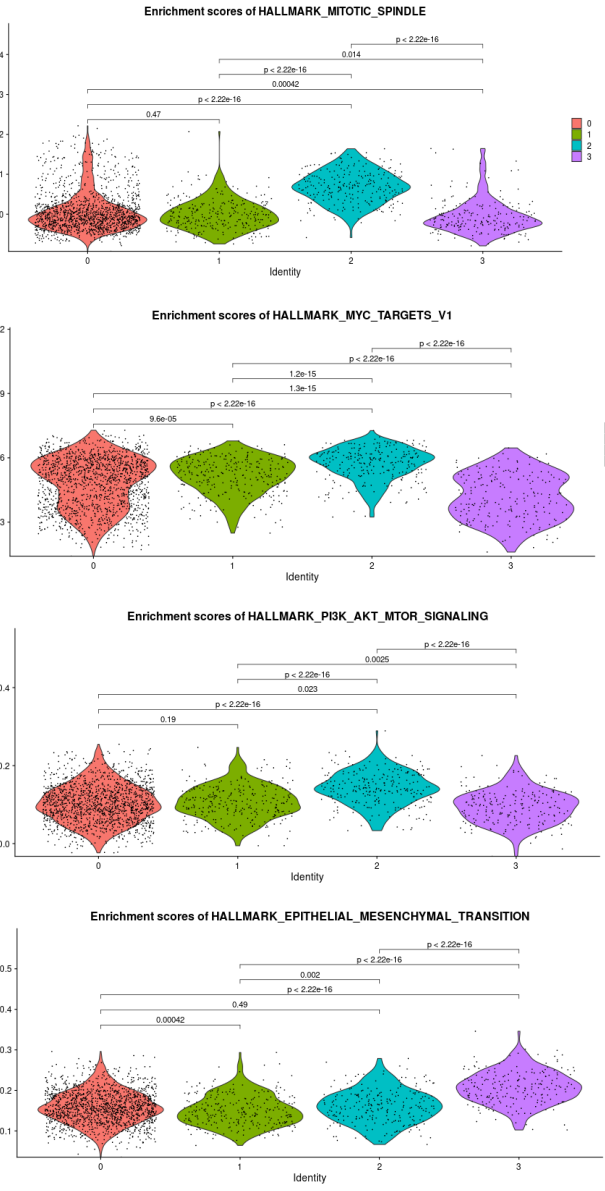

**D** 3119 PDX spleen + ex-vivo cultured (w/w/o EC)

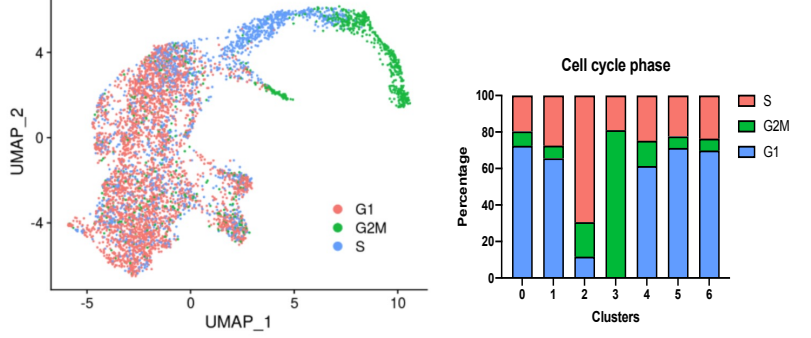

**E** 3119 PDX spleen + ex-vivo cultured (w/w/o EC) – cluster 4

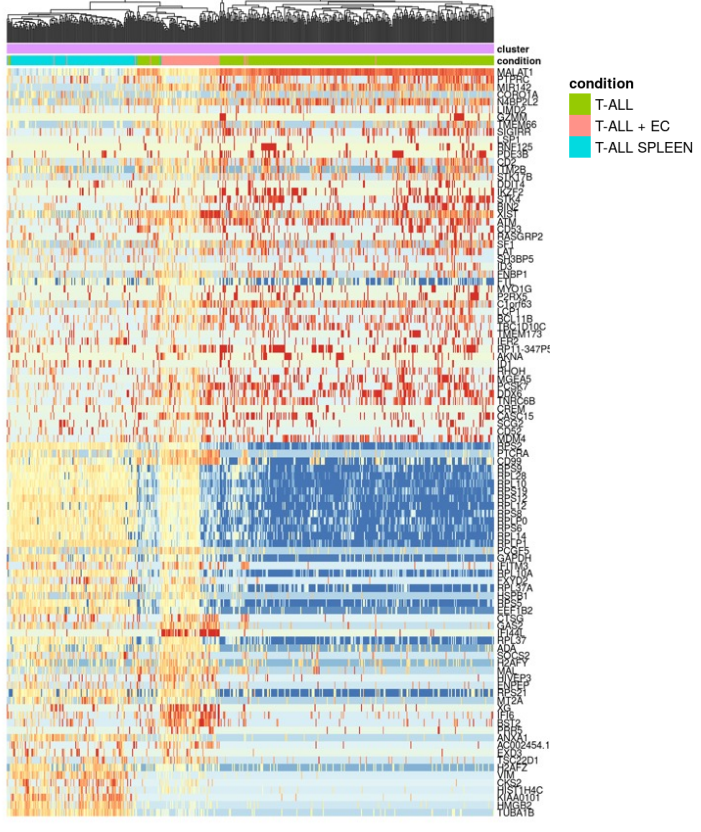



Figure S6

A

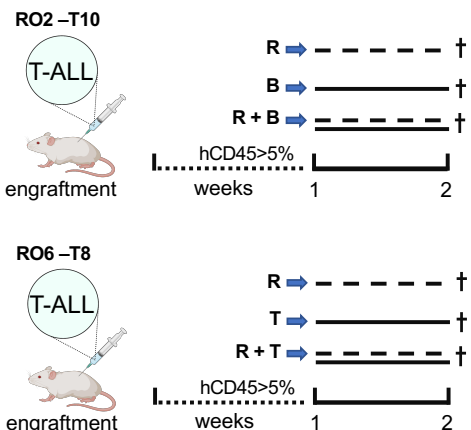

B

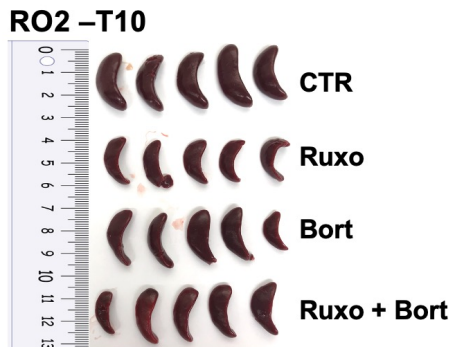

C

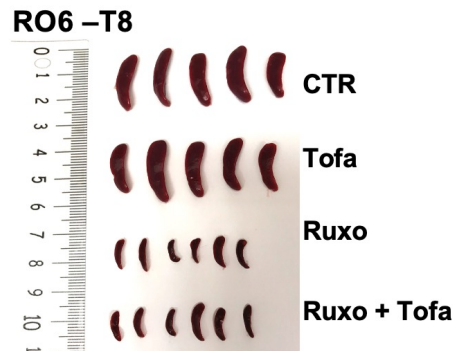

D

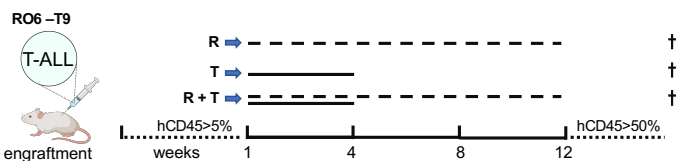

E

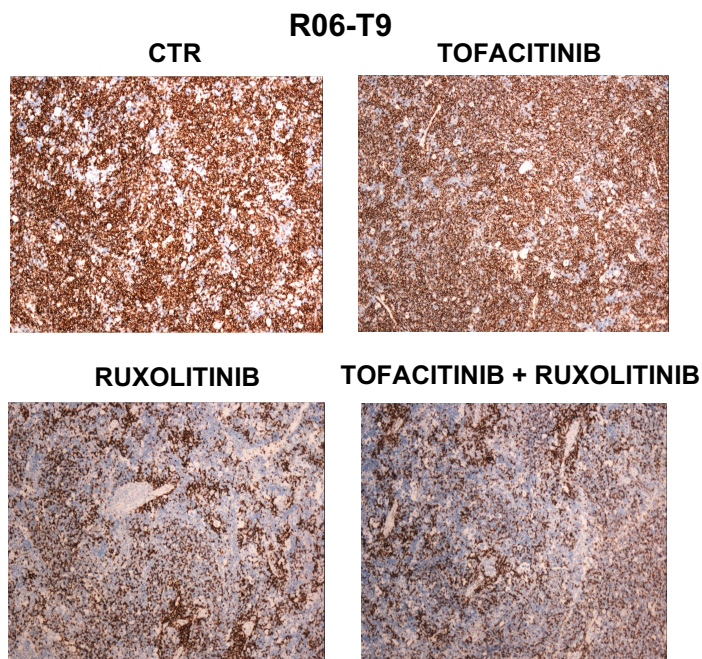

F

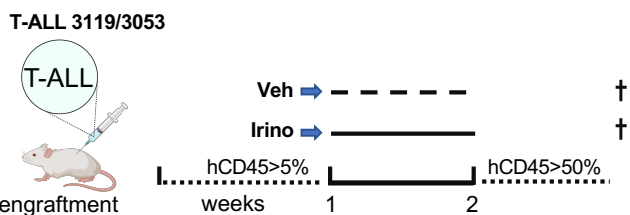

G

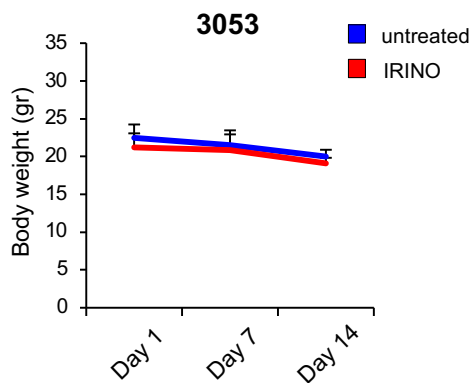

H

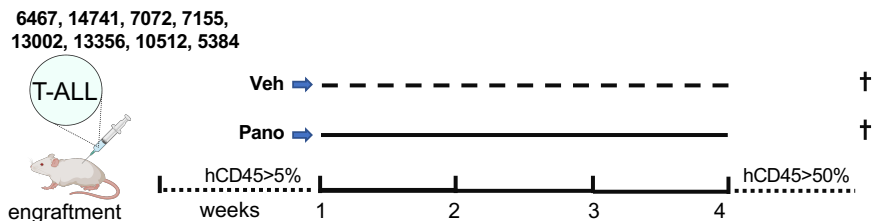

I

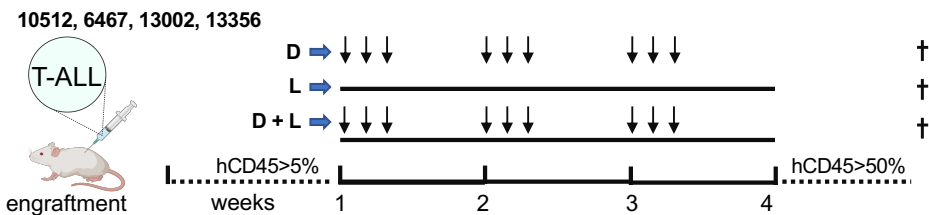

## Supplemental Figures

### Figure S1. Patient-derived-tumor-xenograft (PDX) as models of high-risk T-ALL patients (Referred to Figure 1).

(A) Schematic representation of the generation and expansion of T-ALL PDX models. PB: peripheral blood mononuclear cells; BM: bone-marrow aspirate. Representative readout (i.e. flow cytometry and histology) are also reported (created in BioRender.com).

(B) Time required to reach the first engraftment (expressed as the number of weeks from the implant to the 5% of human blood lymphoblasts in the PB).

(C) Rate of tumor growth expressed as the percentage of human blood T-cells along serial passages.

(D) Representative TCR gamma rearrangement analysis of primary (PR) and two serial passages (T1 and T7) of 3119 and 3053 T-ALL PDX models (reported as proof of concept). DNA nucleotide sequences of primary and PDX are reported at the bottom.

(E) T-ALL cells from five different PDX were cultured in RPMI 10% FCS or StemSpan 10% KSR with or without ILs. The percentage of apoptotic cells was determined at day five. Data are represented as means and  $\pm$  SD of three independent PDX samples.

(F) Dot plot showing reproducibility across four replicates for the 3119 PDX model (as proof of concept).

(G) Ranked compound ID versus viability in RO5, RO6 and 3053 PDX screened in RPMI and StemSpan (SS), showing a decrease in the overall viability for PDXs screened in RPMI.

(H) Venn diagrams denoting the number of active drugs (viability less than 50%, vehicle control) in each media condition (RPMI vs. SS) for two *in vivo* passages (3053 and RO6). Overlap denotes drugs that are effective in both media.

(I) Dot plot correlating the viabilities of 3053 and RO6 PDX at different passages after 433 drug library exposure for 72hrs, cultured in supplemented- RPMI (R) versus SS media (S).

(J) Activity-ranked drugs versus viability of samples (3053 T-ALL model) as a function of increasing *in vivo* passages. Data show a tendency toward loss of active targets (viabilities <50% of vehicle control) with increasing passages. The plot on the right illustrates the distributions of viabilities per passage, showing a shift in distribution to higher viabilities with the increasing passage.

(K) Schematic representation of the SMCHD1-JAK2 fusion. Intron-exon configuration is depicted: 5' (black) and 3' (red). Transcribed exonic sequences are shown as part of a transcript variant resulting from the fusion.

(L) mRNA expression of the SMCHD1-JAK2 fusion in serial 3053 PDX passages assessed by RTqPCR.

(M) Total protein lysates from 3053 PDX at serial passages (T1, T3, T7, T10) were blotted with indicated antibodies. T-ALL cells from the tenth passage were treated, in conventional RPMI supplemented with 10% FCS, with 1  $\mu$ M of ruxolitinib (Ruxo) for 24h. Total cell lysates were blotted with indicated antibodies.

(N) Dot plot showing the average viability of the lowest passages of RO5, RO6, 3119, and 3053 PDX T-ALL exposed to the 433-compound library (left panel) and related principal component analysis (right panel).

(O) Pathway enrichment network plot highlighting the interaction of key pathways based on the differential drugs effective in 3119/3053 and RO5/RO6 T-ALL PDX models. Network plots were generated in Cytoscape with ClueGO, using Reactome: Pathways to determine the links.

(P) Left panel: heatmap showing the dose responses (from 1  $\mu$ M to 62.5 nM) of four different T-ALL PDX models across 10 selected compounds targeting multiple pathways/target proteins for 72 h. The percentage of viability is depicted with a color scale. The average viability is indicated below. T-ALL PDX models id: a:10512; b: 13002; c: 13356; d:7155. Right panel: barplot depicting IC50 calculated from the dose-response curves (where applicable). Values are provided on a logarithmic scale.

(Q) Heatmap and unsupervised clustering depicting gene expression within pathways related to a set of HDAC inhibitors. Genes were selected based on a significant correlation between their expression

across samples and the viability of the treated sample. The viability values are indicated in the color bars on the right.

(R) Heatmap and unsupervised clustering depicting gene expression within pathways targeted by the indicated compounds. Genes were selected based on a significant correlation between their expression across the samples and the viability of the treated samples. The viability values are indicated in the upper color bar.

**Figure S2. ECs provide pro-tumorigenic signals to PDX cells (Referred to Figure 2).**

(A) Schematic representation of stress condition platform in which freshly isolated T-ALL cells from PDX were cultured alone or co-cultured with human E4-ECs(created in BioRender.com).

(B) Pro-survival role of E4-ECs. T-ALL cells from different PDX were cultured in RPMI 10% FCS without interleukins (ILs) (R06 [passages T6]; 3119 [passages T4] and 3053 [passages T6] T-ALL models) in the absence or in the presence of E4-ECs. Left panels: representative histogramas corresponding to Ec and T-ALL recognized by fluorochrome conjugated anti-CD31 or CD45 Abs. Right panels: the percentage of apoptotic cells was determined at day five. Data are represented as means and  $\pm$  SD of three independent PDX samples. P-value were calculated using student t-test. \*P<0.05, \*\*P<0.01, \*\*\*P<0.001, \*\*\*\*P<0.0001.

(C) Pro-survival role of E4-ECs with/without ILs. T-ALL cells from different PDX were cultured in RPMI 10% FCS with or without ILs, in the absence or in the presence of E4-ECs. The percentage of apoptotic cells was determined at day five. Data are represented as means and  $\pm$  SD of three independent PDX samples. P-values were calculated using the student T-test. \*P<0.05, \*\*P<0.01, \*\*\*P<0.001, \*\*\*\*P<0.0001.

(D) Histograms depicting cell number of 3119 cells cultured for 5 days in SS + 10% KSR at 1%, 5%, or 20% of oxygen.

(E) Pro-survival role of E4-ECs in different media/ILs combinations. T-ALL cells from different PDX were cultured in RPMI 10% FCS or SS with or without ILs, in the absence or in the presence of E4-ECs. The percentage of apoptotic cells was determined at day five. Data are represented as means and  $\pm$  SD of three independent PDX samples. P-values were calculated using the student T-test. \*P<0.05, \*\*P<0.01, \*\*\*P<0.001, \*\*\*\*P<0.0001.

(F) Schematics illustrating the second step of the drug screening platform (Co-culture screening), selecting a panel of most-active compounds from the first drug screening (Figure 1F) and challenging them on T-ALL cells with/without E4-ECs. Flow cytometry gating strategy to identify and enumerate E4-ECs and T-ALL cells in the co-culture screening. Viably labeled T-ALL and E4-ECs were harvested after 72h of culture and analyzed by flow-cytometry by an integrated gating strategy.

(G) Overall correlation of drug responses for 7155, 10512, and 6467 T-ALL cells harvested from spleen or bone marrow (compartment correlation) upon exposure to 53 drugs of the library, either in presence or absence of E4-ECs. The linear regression slope and  $R^2$  coefficient are also depicted.

(H) Overall correlation of drug responses for 13356 T-ALL cells harvested from two sibling mice sacrificed one week one from the other (temporal correlation) in presence or absence of E4-ECs. The linear regression slope and  $R^2$  coefficient are also depicted.

(I) Overall correlation of drug responses for 6467 T-ALL cells harvested from two different PDX mice transfer (T4 and T5, passage correlation) in presence or absence of E4-ECs. The linear regression slope and  $R^2$  coefficient are also depicted.

(J) Dotplot depicting the viability of ECs challenged with 352 of the 433 drugs (80%) employed in the screening of T-ALL cells (1uM). Only 17/352 compounds (5%) produced significant toxicity (viability<50%).

(K) Line dot-plots illustrating specific cell death (SCD) of each drug from the drug screening without (left) or with (right) ECs spanning the 10 PDX T-ALL models. A trend towards decreased SCD can be observed in all cases.

- (L) Barplot showing the number of models where an EC-rescue > 20% is reached for each drug. Some compounds were rescued more efficiently than others, some others were not rescued at all.
- (M) Pathway enrichment network plot highlighting the interaction of key pathways targeted by the most rescued drugs (Figure 2D), some common pathways can be observed.
- (N) Heatmap showing the differential responses of drugs per T-ALL PDX line and their proximity through unsupervised clustering (dendrogram at the bottom).
- (O) Barplot showing the number of models where the efficacy threshold (SCD  $\geq$  50%) was reached for each drug (only the +EC conditions were considered). Some compounds were still pan-active regardless of the presence of ECs while others were completely inactive.
- (P) Pie charts indicating the drugs having greater than 50% SCD for the 10 T-ALL PDX models.
- (Q) Pathway enrichment network plot highlighting the interaction of key pathways targeted by drugs significantly efficient in ETP-ALL vs non-ETP (from Figure 2F).
- (R) Heatmap depicting delta SCD (+EC-EC) of 12 extra compounds tested in 7 PDX T-ALL models. Also in this smaller subset, significant rescues and remarkable heterogeneity were observed.
- (S) Barplot depicting SCD upon exposure to dasatinib (3119 PDX model) ruxolitinib, tofacitinib or ruxolitinib + tofacitinib (RO2 and RO6 PDX models) in the presence or absence of ECs.

**Figure S3. ECs produce transcriptomic changes to T-ALL cells (Referred to Figure 3).**

- (A) Violin plots describing the number of expressed genes, the number of counts, and the percentage of expressed mitochondrial genes across the samples that were included in the single-cell RNA-sequencing analysis: RO2 and 3119 T-ALL cells and E4-ECs that were cultured alone or together.
- (B) Heatmap of annotation scores for single-cell types across all cells. Scores were calculated using SingleR package in R and demonstrated the expression profiles of individual single cells, allowing cell recognition and assignment.
- (C) UMAP plots displaying the expression of T-cell marker genes (i.e., CD3G and CD3D) and EC marker genes (i.e., VWF and CDH5).
- (D) UMAP plots displaying clusters of T-ALL and ECs in RO2 and 3119 PDX models, color-coded by culture condition (co-cultured vs cultured alone).
- (E) Barplot displaying the percentage of cells in G1, S, and G2M phase of the cell cycle in T-ALL alone or co-cultured with ECs of RO2 (left) or 3119 (right) PDX models.
- (F) Venn diagram showing overlap of up-regulated genes of bulk (3199, 3139, and 3120 PDX models) and single-cell (3119 PDX model) RNA-seq in T-ALL cells that were cultured together versus T-ALL cells that were cultured alone.
- (G) Venn diagrams showing overlap of up- (left) and down- (right) regulated genes in 3119 and RO2 T-ALL cells that were cultured together versus alone. Data were obtained from single-cell RNA-seq.
- (H) Gene expression entropy of 3119 and RO2 T-ALL cells calculated using the SLICE tool on single-cell RNA-seq data. T-ALL cells display elevated entropy levels when co-cultured with ECs, implying a higher degree of plasticity than those cultured alone.
- (I) Enrichment plots for MYC pathway RO2 and 3119 T-ALL cells that were cultured with E4-ECs versus alone. Gene expression values were obtained from single-cell RNA-sequencing. The adjusted p-values are reported.
- (J) Dot-plot displaying expression levels of DTX1, NOTCH3, HES1, HES4, and IGF1R genes in RO2 and 3119 T-ALL cells that were cultured alone or co-cultured with E4-ECs. The size of the dot indicates the percentage of cells expressing each gene, and the color denotes the average expression level across all cells. Expression levels were measured using log-normalized counts. Adjusted p-values for the differential expression between the two conditions are reported.

**Figure S4. T-ALL interaction modulate the phenotype of ECs (Referred to Figure 4).**

- (A) Percentage of E4-ECs co-cultured with T-ALL vs cultured alone in the clusters identified by single-cell RNA sequencing in both 3119 and RO2 T-ALL models.

(B) Enrichment plots for interferon-alpha and gamma response pathways E4-ECs cultured with RO2 and 3119 T-ALL cells versus alone. Gene expression values were obtained from single-cell RNA-sequencing. Adjusted p-values are reported.

(C) Gene expression entropy of ECs calculated using the SLICE tool on single-cell RNA-seq data shows that E4-ECs display elevated entropy level when co-cultured with T-ALL elements, implying a higher degree of plasticity compared to those cultured alone.

(D) Venn diagrams depicting overlap of ligand-receptor interactions obtained through CellPhoneDB package on RO2 and 3119 PDX models (both on T-ALL and EC compartments), based on the relative expression level measured by single-cell RNA seq.

(E) Dotplot showing that recombinant IGFBP-7 counteracts the rescue of E4-ECs against selective drugs. Cells from 3119 and 3053 T-ALL models were exposed to the 40 drugs from (A) either alone or in the presence of E4-ECs with and without IGFBP-7 (500 ng/mL). Only drugs with significant rescue abrogation are depicted. The percentage of apoptotic (Propidium-Iodide-PI+) cells is indicated for each compound in relation to the untreated control. Differences were evaluated with T-test and corrected for multiple comparison.

(F) Schematic representation of the IGFR1 signaling pathway and target proteins by the compounds listed in Figure S4E (created with BioRender.com).

(G) Venn diagram showing the comparison of genes down-regulated in TEC vs. normal ECs (green circle) and in educated vs naïve E4-ECs (blue circle). P-value was calculated using a hypergeometric test.

(H) Venn diagram showing the comparison of Top expressed genes in E4-naïve (green circle), E4-educated ECs (red circle) and HUVEC (blue circle). P-value was calculated using a hypergeometric test.

(I) Scheme depicting the identification of “education signatures” on the T-ALL and EC side for both 3119 and RO2 PDX models and the selection of candidates co-shared by the two models (referred to Figure 4G) (created with BioRender.com).

### **Figure S5. *In vitro* EC-educated T-ALL mirror *in vivo* T-ALL cells (Referred to Figure 5).**

(A) UMAP plots (left panel) and cell cycle (right panel) of single-cell RNA-seq of 3119 T-ALL cells harvested from PDX mouse spleen.

(B) Heatmap showing the differentially expressed genes among the four different clusters from the 3119 single-cell RNA-seq analysis. The top 40 up- and down-regulated genes are depicted for each cluster.

(C) Violin plots depicting the GSEA on the 3119 single-cell RNA-seq analysis showing the enrichment of the mitotic spindle hallmarks, Myc targets, and PI3K-AKT-mTOR pathway in the cluster #2, and the enrichment of the epithelial mesenchymal transition hallmarks in the cluster #3.

(D) Single-cell RNA-seq analysis of 3119 T-ALL cells from *in-vitro* experiment (cultured with or without ECs) and *ex-vivo* from the spleen of a 3119 PDX mouse. UMAP plots of single-cell RNA-seq of T-ALL cells color coded by cell cycle (G1, S and G2M phase) (upper panel). Barplots showing the different proportions of cells in G1/S/G2M phase based on cluster identity for both RO2 and 3119 T-ALL PDX models (bottom panel).

(E) Heatmap of the genes from 3119 “education signature” (Figure 3D) applied to cluster 4 (from Figure 5B) containing enough cells of all three compartments (in vitro T-ALL cultured alone vs with ECs and ex-vivo splenic T-ALL). Cell proportions in cluster 4 are found in Figure 5D. T-ALL cells from the spleen are clustered together with EC-co-cultured T-ALL cells based on the expression of the education signature.

### **Figure S6 Efficacy of positive hits from stepwise drug discovery approach in-vivo (Referred to Figure 6).**

(A) Treatment scheme for RO2 and RO6 T-ALL PDX models with ruxolitinib (R), bortezomib (B), tofacitinib (T), or combinations (R+T; R+B). After engraftment (circulating hCD45+ cells>5% in

peripheral blood), mice are randomized in the treatment arms vs vehicle. Mice were treated for 2 weeks and then sacrificed to assess tumor burden and disease dissemination.

(B) Photographs of spleens from RO2 T-ALL PDX models treated with ruxolitinib (ruxo) (clow ab libido), bortezomib (bort) (0.5 mg/kg/day), and combinations (ruxo + bort tofa). The tumor passage was T10.

(C) Photographs of spleens from RO6 T-ALL PDX models treated with ruxolitinib (ruxo) (clow ab libido), tofacitinib (tofa) (80 mg/kg/day) and combinations (ruxo + tofa). The tumor passage was T8.

(D) Treatment scheme for RO6 T-ALL PDX models with ruxolitinib (R), tofacitinib (T), or combination (R+T). After engraftment (circulating hCD45+ cells>5% in peripheral blood), mice are randomized in the treatment arms vs vehicle. Mice were treated for 4 weeks (tofacitinib) or 12 weeks (ruxolitinib) and then followed-up to assess survival and tumor burden. Mice were sacrificed when circulating hCD45+ cells in peripheral blood reached  $\geq 50\%$ .

(E) Representative light microscopy of tissue distribution of the neoplastic cells in the spleen treated with the indicated compounds (RO6 PDX model, 20X magnification) as described in (B).

(F) Treatment scheme for 3119 and 3053 T-ALL PDX models with irinotecan (irino) or vehicle (veh). After engraftment (circulating hCD45+ cells>5% in peripheral blood), mice are randomized in the treatment arms vs vehicle. Mice were treated for 2 weeks and then followed-up to assess survival and tumor burden. Mice were sacrificed when circulating hCD45+ cells in peripheral blood reached  $\geq 50\%$ .

(G) Mice weight in grams for NSG mice treated with irinotecan or vehicle (3053 T-ALL PDX model).

(H) Treatment scheme for 8 different T-ALL PDX models (6467, 14741, 7072, 7155, 13002, 13356, 10512, 5384) with panobinostat (pano) or vehicle (veh). After engraftment (circulating hCD45+ cells>5% in peripheral blood), mice are randomized in the treatment arms vs vehicle. Mice were treated for 4 weeks and then followed-up to assess survival and tumor burden. Mice were sacrificed when circulating hCD45+ cells in peripheral blood reached  $\geq 50\%$ .

(I) Treatment scheme for 4 different T-ALL PDX models (10512, 6467, 13002, 13356) with daunorubicin (D), linsitinib (L), or combination (D+L). After engraftment (circulating hCD45+ cells>5% in peripheral blood), mice are randomized in the treatment arms vs vehicle. Mice were treated for 3 weeks (D) or 4 weeks (L) and then followed-up to assess survival and tumor burden. Mice were sacrificed when circulating hCD45+ cells in peripheral blood reached  $\geq 50\%$ .

## References

1. Qin H, Dong Z, Wang X, et al. CAR T cells targeting BAFF-R can overcome CD19 antigen loss in B cell malignancies. *Sci Transl Med*. 2019;11(511).
2. Palikuqi B, Nguyen DT, Li G, et al. Adaptable haemodynamic endothelial cells for organogenesis and tumorigenesis. *Nature*. 2020;585(7825):426-432.
3. Subramanian A, Tamayo P, Mootha VK, et al. Gene set enrichment analysis: a knowledge-based approach for interpreting genome-wide expression profiles. *Proc Natl Acad Sci U S A*. 2005;102(43):15545-15550.
4. Anders S, Huber W. Differential expression analysis for sequence count data. *Genome Biol*. 2010;11(10):R106.
5. McGinnis CS, Murrow LM, Gartner ZJ. DoubletFinder: Doublet Detection in Single-Cell RNA Sequencing Data Using Artificial Nearest Neighbors. *Cell Syst*. 2019;8(4):329-337 e324.
6. Hafemeister C, Satija R. Normalization and variance stabilization of single-cell RNA-seq data using regularized negative binomial regression. *Genome Biol*. 2019;20(1):296.
7. Aran D, Looney AP, Liu L, et al. Reference-based analysis of lung single-cell sequencing reveals a transitional profibrotic macrophage. *Nat Immunol*. 2019;20(2):163-172.
8. Mabbott NA, Baillie JK, Brown H, Freeman TC, Hume DA. An expression atlas of human primary cells: inference of gene function from coexpression networks. *BMC Genomics*. 2013;14:632.

9. Consortium EP. An integrated encyclopedia of DNA elements in the human genome. *Nature*. 2012;489(7414):57-74.
10. Schubert M, Klinger B, Klunemann M, et al. Perturbation-response genes reveal signaling footprints in cancer gene expression. *Nat Commun*. 2018;9(1):20.
11. Guo M, Bao EL, Wagner M, Whitsett JA, Xu Y. SLICE: determining cell differentiation and lineage based on single cell entropy. *Nucleic Acids Res*. 2017;45(7):e54.
12. Efremova M, Vento-Tormo M, Teichmann SA, Vento-Tormo R. CellPhoneDB: inferring cell-cell communication from combined expression of multi-subunit ligand-receptor complexes. *Nat Protoc*. 2020;15(4):1484-1506.

## Tables

### Table S1. Patient characteristics.

| Patient ID | Sample type | Sex | Age | Immunophenotype                                                                                                                                | IF         | Genetic alteration                                                                  | Stratification | Therapy                                                                                                         | Response         | Survival status                                 |
|------------|-------------|-----|-----|------------------------------------------------------------------------------------------------------------------------------------------------|------------|-------------------------------------------------------------------------------------|----------------|-----------------------------------------------------------------------------------------------------------------|------------------|-------------------------------------------------|
| 2958       | Diagnosis   | M   | 1   | CD1a+/- CD2+ CD4- CD5+ CD7+ CD8+ CD10- CD13+ CD33- CD34+/- CD44- CD45RA- CD99+/- CD117+/- CD123- sCD3- sTCRa/b+/- cCD3+ cTCRa/b+ HLA-Dr- cTDT+ | Cortical-T | Karyotype: del(6q) and an add(10q)                                                  | Canonical      | Methotrexate, Vincristine, Daunorubicin, Mercaptopurine, Decadron, Cytosar, Cytarabine, L-Asparaginase, IT-MTX. | CR               | Alive up to 18 years, clinical remission 16 yrs |
| 3053       | Diagnosis   | M   | 3   | CD1a+/- CD2+ CD4- CD5+ CD7+/- CD8- CD10- CD13+/- CD33- CD34+/- CD44- CD45RA- CD99+ CD117- CD123- sCD3+/- sTCRa/b+/- cCD3+ cTCRa/b+             | Cortical-T | -                                                                                   | Near ETP       | no data available                                                                                               | CR               | Alive up to 9 years                             |
| 3119       | Diagnosis   | F   | 39  | CD1a- CD2+ CD4+ CD5+ CD7+ CD8+ CD10- CD13- CD33- CD44- CD45RA- CD99+ CD117- CD123- cCD3+ cTCRa/b+ HLA-DR- TDT+                                 | Cortical-T | NUP214/ABL                                                                          | Canonical      | hyper-CVAD and auto-PBSCT                                                                                       | NA               | Deceased                                        |
| 3120*      |             |     |     |                                                                                                                                                |            |                                                                                     |                |                                                                                                                 |                  |                                                 |
| 3139*      | Relapse     | F   | 40  | CD2+ CD4+ CD5+ CD7+/- CD8+ CD10- CD13+/- CD34- sCD3- sTCRa/b+/- HLA-DR TDT+                                                                    | Cortical-T | NUP214/ABL                                                                          | Canonical      |                                                                                                                 | NA               | Deceased                                        |
| 5882       | Diagnosis   | F   | 31  | CD1a+ CD2- CD4+/- CD5+ CD7+ CD8- CD10+ CD13+/- CD33- CD34- CD45+ CD117- sCD3+/- cCD3+ HLA-DR- TDT+                                             | Cortical-T | JAK1 L783F**                                                                        | ETP            | hyperCVAD                                                                                                       | NA               | Lost follow up after 21 months                  |
| 6032       | Diagnosis   | F   | 54  | CD2-CD4+/- CD5- CD7+ CD8- CD10- CD11b+ CD13+ CD15+ CD33+ CD34+ CD45- CD56+ CD99+/- CD117- cCD3+ cTDT+                                          | ETP        | -                                                                                   | ETP            | hyperCVAD with augmented PEG Asparaginase                                                                       | NA               | Deceased 1yr                                    |
| 6467       | Diagnosis   | M   | 36  | CD2- cCD3+ sCD3+/- CD4- CD5+ CD7+ CD8- CD13- CD33- CD34+/- CD56+/- TdT+/-                                                                      | Cortical-T | Hyperdiploid karyotype MLL+                                                         | Near ETP       | CALGB 10403                                                                                                     | Relapsed         | Deceased 6m                                     |
| 7072       | Relapse     | M   | 37  | CD2- cCD3+ CD4- CD5+ CD7+ CD8- CD33- CD34- CD38+                                                                                               | Cortical-T | Hyperdiploid karyotype MLL+                                                         | Near ETP       | HyperCVAD 1B refractory CALGB 10403 BM transplant haplocord SCT => nelarabine, etoposide, cyclophosphamide      | Relapsed         | Deceased 1yr                                    |
| 6609       | Diagnosis   | M   | 30  | CD2+ cCD3+ CD5+ CD4+/- CD7+ CD8 +/- CD13+/- CD33- CD34+ CD38+ CD117- TdT+                                                                      | Cortical-T | interstitial deletion of 6q (MYB WT)                                                | Canonical      | Hyper-CVAD , allogeneic SCT                                                                                     | Refractory       | Deceased 1yr                                    |
| 7889       | Diagnosis   | M   | 31  | CD2+ CD3+ CD4+/- CD8+/- CD5+ CD7+ CD38+ CD34+ CD52+ CD117- CD13+/- CD33- TdT+                                                                  | Cortical-T | interstitial deletion of 6q (MYB WT)                                                | Canonical      | HyperCVAD MTX/Cytarabine, Allogeneic SCT => Cyclophosphamide/Etoposide/nelarabine and Pegasparaginase           | Relapsed         | Deceased 1yr                                    |
| 7155       | Diagnosis   | M   | 14  | CD1a- CD2+/- cCD3+/- CD5+/- CD7+ CD4+ CD8- CD34+ CD33- CD13+/- CD38+/- TdT+                                                                    | ETP        | EGR1 (5q31); + D5S23/D5S721 (5p15.2); del 7p13; +8                                  | ETP            | COG AALL0434                                                                                                    | CR               | Alive 8 yrs Clinical remission                  |
| 7653       | Diagnosis   | M   | 5   | cCD3+, CD7+, CD2+, CD5+, CD4+ CD8- CD10+/- CD13- CD33- CD117+/- TdT+                                                                           | Cortical-T | N/A                                                                                 | Canonical      | AALL0434 Arm C (HD methotrexate, no nelarabine arm)                                                             | CR               | Alive 7 yrs remission; 4 yrs off therapy        |
| 10512      | Diagnosis   | M   | 17  | CD1a+/- CD2+ CD5+/- CD7+, CD4+ and CD8+ CD10+ CD38+ CD99+ TdT+                                                                                 | Cortical-T | N/A                                                                                 | Canonical      | COG AALL1231 (Arm B)                                                                                            | CR               | Alive 5 yrs, 2 yrs off therapy                  |
| 13002      | Diagnosis   | M   | 12  | CD45+/- cCD3+ sCD3 +/- CD7+ CD5+ CD34 +/- CD2+ CD4 +/- CD8 +/- CD99+ CD10+/- CD1a +/- CD13+, CD57 +/- TdT+                                     | Cortical-T | N/A                                                                                 | Canonical      | AALL0434                                                                                                        | CR               | Alive 4 yrs                                     |
| 13356      | Diagnosis   | M   | 12  | cCD3+ sCD3- CD2 +/- CD5+/- CD7+ CD4- CD8+/- CD99+ CD10 +/- CD34+ CD13- CD117- HLA-DR- CD33++ CD11b+/- TdT+                                     | ETP        | NOTCH,PHF6 JAK3, SET- NUP214                                                        | ETP            | AALL0434                                                                                                        | CR               | Alive 4yrs                                      |
| 14741      | Diagnosis   | M   | 9   | cCD3+ sCD3 +/- CD7++ CD2+/- CD5+ CD8+ CD4+/- CD10+/- CD99+ CD34+/- CD117+/- TdT+                                                               | Cortical-T | Trisomy 8                                                                           | Canonical      | AALL0434                                                                                                        | CR               | Alive 3 yr                                      |
| 13840      | Diagnosis   | F   | 22  | CD1a cCD3+ sCD3 +/- CD2+ CD5+ CD4+ CD8+ CD7+ CD10+ CD34- CD56+/- CD117- TdT+                                                                   | Cortical-T | NA                                                                                  | Canonical      | AALL0434                                                                                                        | CR               | Alive up to 4yrs. 5 months off therapy          |
| R02***     | Diagnosis   | F   | 37  | N/A                                                                                                                                            | Cortical-T | JAK1 E897K JAK3 A572V STAT5B S434L NOTCH1 L1585PSTAT5B S434L NOTCH1 +PICALM/ MLLT10 | Canonical      | GIMEMA LAL2000                                                                                                  | Relapse after CR | Lost follow up                                  |
| R05***     | Diagnosis   | M   | 35  | N/A                                                                                                                                            | Cortical-T | IL7R V1381 IL7R V1381                                                               | Canonical      | GIMEMA LAL2000                                                                                                  | NA               | Deceased                                        |
| R06***     | Diagnosis   | F   | 23  | CD2+/- CD5+ CD7+CD4+ CD8+/- CD57                                                                                                               | Pre-T      | STAT5B Y665F STAT5B N642H                                                           | Canonical      | GIMEMA LAL1308                                                                                                  | Relapse after CR | Deceased                                        |
| R07***     | Diagnosis   | M   | 36  | N/A                                                                                                                                            | Cortical-T | H3F3A K28M + PTEN/FAS (out of frame)                                                | ETP            | NILG 10/07                                                                                                      | Refractory       | Deceased                                        |



\* 3119 (peripheral blood at diagnosis), 3120 (bone marrow aspirate sample at diagnosis), and 3139 represent diagnosis and relapse samples from the same patient

\*\* Mutation not confirmed in PDTX

\*\*\* Samples provided and previously analyzed by "Sapienza" University of Rome (Gianfelici et al., 2016)

CR = Complete Remission

**Table S2. List of compounds and their respective targets used in the 433-drug screening**

| Index | Compounds            | Targets        | Description (including IC/EC-50 when available), Source: Selleck Chem                                                                                                                                                                                                                                                                                                                                                                                                                                                                                                                                                                                                                                                                                                                                                                                                                                                                                                                                                                                                                                                                                                                                                                                                                                                                                                                                                                                                                                                                                                                                                                                                        |
|-------|----------------------|----------------|------------------------------------------------------------------------------------------------------------------------------------------------------------------------------------------------------------------------------------------------------------------------------------------------------------------------------------------------------------------------------------------------------------------------------------------------------------------------------------------------------------------------------------------------------------------------------------------------------------------------------------------------------------------------------------------------------------------------------------------------------------------------------------------------------------------------------------------------------------------------------------------------------------------------------------------------------------------------------------------------------------------------------------------------------------------------------------------------------------------------------------------------------------------------------------------------------------------------------------------------------------------------------------------------------------------------------------------------------------------------------------------------------------------------------------------------------------------------------------------------------------------------------------------------------------------------------------------------------------------------------------------------------------------------------|
| 1     | FG-4592              | EPAS1, EPO     | FG-4592 is an oral inhibitor of hypoxia inducible factor (HIF) prolyl hydroxylase currently in clinical development for the treatment of anemia. FG-4592 stabilizes the activities of HIF, a cytosolic transcription factor, leading to activation of the genes associated with erythropoiesis, including erythropoietin and enzymes involved in iron metabolism.                                                                                                                                                                                                                                                                                                                                                                                                                                                                                                                                                                                                                                                                                                                                                                                                                                                                                                                                                                                                                                                                                                                                                                                                                                                                                                            |
| 2     | Rizatriptan Benzoate | HTR1A          | Rizatriptan blocks neurogenic vasodilation via an action on 5-HT <sub>1D</sub> receptors located on perivascular trigeminal nerves to inhibit CGRP release in anesthetized guinea pigs. Rizatriptan evokes a transient reduction in dural blood vessel diameter, which recovered to baseline values within 10 min in anaesthetized guinea pigs. Rizatriptan significantly inhibits dural plasma protein extravasation produced by high intensity electrical stimulation of the trigeminal ganglion. Rizatriptan significantly reduces electrically stimulated dural vasodilation in anesthetized rats. Rizatriptan Benzoate significantly reduced SP mRNA levels in the midbrains of normal and model group rats, indicating that Rizatriptan Benzoate can downregulate SP gene expression in the rat midbrain. Rizatriptan Benzoate significantly reduces midbrain PENK mRNA expression, decreasing the levels of midbrain met-enkephalin and leu-enkephalin, and thereby weakening the analgesic effects of the endogenous pain modulatory system in rat model of migraine. Rizatriptan Benzoate leads to the number of Fos-like immunoreactive neurons decreased in the spinal trigeminal nucleus caudal part and raphe magnus nucleus, increased the number of Fos-like immunoreactive neurons in the periaqueductal gray and remained unchanged in the ventromedial hypothalamic nucleus and mediodorsal thalamus nucleus in conscious rats. Rizatriptan Benzoate markedly reduces the number of head-flicks in the rats. Rizatriptan Benzoate also significantly reduces the duration of grooming behavior by nearly 2-fold when compared with that without treatment. |
| 3     | Fulvestrant          | ESR            | Fulvestrant is an effective inhibitor of the growth of ER-positive MCF-7 (with IC <sub>50</sub> of 0.29 nM) but with no effect on the growth of ER-negative BT-20 human breast cancer cells. Fulvestrant causes accumulation of cells in G <sub>0</sub> /G <sub>1</sub> and also reduces the proportion of cells capable of continued DNA synthesis. Fulvestrant competitively inhibits binding of oestradiol to the estrogen receptor. Fulvestrant blocks nuclear localization of the ER through impairing receptor dimerisation, and energy-dependent nucleo-cytoplasmic shuttling. Because of the instability of fulvestrant-ER complex, the binding of Fulvestrant with ER finally results in accelerated degradation of the ER protein. Fulvestrant (10 nM) not only decreases IGF-1R mRNA levels but also decreases the half-life. Treatment with 100 μM Fulvestrant leads to a time dependent increase of TNFR1 and TRADD steady-state mRNA levels in MCF-7 cells. Fulvestrant is capable of down-regulating androgen receptor expression and diminishes androgenic responses in LNCaP human prostate cancer cells. Fulvestrant also significantly attenuates R1881-stimulated growth by 70%. Fulvestrant is able to modulate mitosis and cell death in immature cerebellar neurons via rapid activation of MAPK.                                                                                                                                                                                                                                                                                                                                                     |
| 4     | Tolfenamic Acid      | COX-2          | Tolfenamic Acid is a COX-2 inhibitor with IC <sub>50</sub> of 0.2 μM.                                                                                                                                                                                                                                                                                                                                                                                                                                                                                                                                                                                                                                                                                                                                                                                                                                                                                                                                                                                                                                                                                                                                                                                                                                                                                                                                                                                                                                                                                                                                                                                                        |
| 5     | Ramelteon            | MTNR1A, MTNR1B | Ramelteon inhibits forskolin-stimulated cAMP production with IC <sub>50</sub> of 21.2 pM in CHO cells. Ramelteon has high affinity with recombinant human MT1 and MT2 receptors with pK <sub>i</sub> of 10.05 and 9.70, respectively. Ramelteon inhibits <i>Xenopus laevis</i> melanophore pigment granule aggregation with pEC <sub>50</sub> of 11.48. Ramelteon (1 nM) increases ERK1/2 phosphorylation not only in MT1/MT2 cerebellar granule cells but also in cerebellar granule cells expressing only one of the two melatonin receptors. 4P-PDOT blocks the stimulatory action of Ramelteon (1 nM) in MT1 KO cerebellar granule cells, while luzindole attenuates the action of Ramelteon (1 nM) in MT2 KO cerebellar granule cells. Ramelteon (100 μM) induces any pigment dispersion while melatonin completely disperses aggregated melanophores at 10 μM.                                                                                                                                                                                                                                                                                                                                                                                                                                                                                                                                                                                                                                                                                                                                                                                                         |
| 6     | Tropium chloride     | CHRM1          | Tropium chloride (Sanctura) is a competitive muscarinic cholinergic receptor antagonist.                                                                                                                                                                                                                                                                                                                                                                                                                                                                                                                                                                                                                                                                                                                                                                                                                                                                                                                                                                                                                                                                                                                                                                                                                                                                                                                                                                                                                                                                                                                                                                                     |
| 7     | Granisetron HCl      | HTR3A          | Granisetron blocks the delayed rectifier current (I <sub>K</sub> ) of feline isolated ventricular myocytes with a K <sub>D</sub> of 4.3 mM. Granisetron shows an intrinsic voltage-dependence as the block increases with depolarization. Granisetron blocks from the intracellular side at a binding site located 10% across the transmembrane electrical field. Granisetron (3 mM) prolongs the action potential duration (APD) by about 30% at 0.5 Hz in feline isolated ventricular myocytes. Granisetron but not Ondansetron, could prevent the activation of putative 5-H <sub>2</sub> autoreceptors, thus leading to a decrease in serotonin release by the enterochromaffin cells.                                                                                                                                                                                                                                                                                                                                                                                                                                                                                                                                                                                                                                                                                                                                                                                                                                                                                                                                                                                   |
| 8     | A-769662             | PRKAA1         | A-769662 stimulates partially purified rat liver AMPK with EC <sub>50</sub> with 0.8 μM. A-769662 activates AMPK purified from multiple tissues and species in a dose-responsive manner with modest variations in observed EC <sub>50</sub> s. EC <sub>50</sub> s determined for A-769662 using partially purified AMPK extracts from rat heart, rat muscle, or human embryonic kidney cells (HEKs) are 2.2 mM, 1.9 mM, or 1.1 mM, respectively. A 4 hours treatment of primary rat hepatocytes with A-769662 dose-dependently increases ACC phosphorylation, which correlated inhibition of fatty acid synthesis with IC <sub>50</sub> of 3.2 μM. A-769662 also inhibits fatty acid synthesis in mouse hepatocytes with IC <sub>50</sub> with 3.6 μM. A-769662 activates AMPK both allosterically and by inhibiting                                                                                                                                                                                                                                                                                                                                                                                                                                                                                                                                                                                                                                                                                                                                                                                                                                                         |

|    |                               |             |                                                                                                                                                                                                                                                                                                                                                                                                                                                                                                                                                                                                                                                                                                                                                                                                                                                                                                                                                                                                                                                                                                                                                                                                                                                                                                                                                   |
|----|-------------------------------|-------------|---------------------------------------------------------------------------------------------------------------------------------------------------------------------------------------------------------------------------------------------------------------------------------------------------------------------------------------------------------------------------------------------------------------------------------------------------------------------------------------------------------------------------------------------------------------------------------------------------------------------------------------------------------------------------------------------------------------------------------------------------------------------------------------------------------------------------------------------------------------------------------------------------------------------------------------------------------------------------------------------------------------------------------------------------------------------------------------------------------------------------------------------------------------------------------------------------------------------------------------------------------------------------------------------------------------------------------------------------|
|    |                               |             | dephosphorylation of AMPK on Thr-172, similar to the effects of AMP. A-769662 inhibits proteasomal function by an AMPK-independent mechanism. A-769662 affects the in-vitro activity of purified 26S proteasomes but not the in-vitro activity of purified 20S proteasomes. A-769662 has toxic effects on MEF cells. A recent research shows A-769662 inhibited cell proliferation and DNA synthesis.                                                                                                                                                                                                                                                                                                                                                                                                                                                                                                                                                                                                                                                                                                                                                                                                                                                                                                                                             |
| 9  | Losartan Potassium (DuP 753)  | AGTR        | Losartan is an angiotensin II receptor antagonist, competes with the binding of angiotensin II to AT1 receptors with IC50 of 20 nM.                                                                                                                                                                                                                                                                                                                                                                                                                                                                                                                                                                                                                                                                                                                                                                                                                                                                                                                                                                                                                                                                                                                                                                                                               |
| 10 | Tolazoline HCl                | ADRA1A      | Tolazoline is a pulmonary vasodilator indicated used to decrease pulmonary vascular resistance (PVR) in persistent pulmonary hypertension of the newborn (PPHN). Tolazoline has moderate alpha-adrenergic blocking activity and has histamine agonist activity. Tolazoline usually reduces pulmonary arterial pressure and vascular resistance. Tolazoline is not as broadly effective as SNP against all spasmogens investigated. However, it may be effective in counteracting alpha-adrenoceptor-mediated vasospasm in human radial arteries.                                                                                                                                                                                                                                                                                                                                                                                                                                                                                                                                                                                                                                                                                                                                                                                                  |
| 11 | Tenofovir Disoproxil Fumarate |             | Tenofovir disoproxil fumarate belongs to nucleotide analogue reverse transcriptase inhibitors (nRTIs).                                                                                                                                                                                                                                                                                                                                                                                                                                                                                                                                                                                                                                                                                                                                                                                                                                                                                                                                                                                                                                                                                                                                                                                                                                            |
| 12 | Ataluren (PTC124)             | CFTR        | Ataluren (PTC124) selectively induces ribosomal read-through of premature but not normal termination codons, with EC50 of 0.1 $\mu$ M in HEK293 cells, may provide treatment for genetic disorders caused by nonsense mutations (e.g. CF caused by CFTR nonsense mutation). Phase 3.                                                                                                                                                                                                                                                                                                                                                                                                                                                                                                                                                                                                                                                                                                                                                                                                                                                                                                                                                                                                                                                              |
| 13 | Candesartan                   | AGTR        | Candesartan is an angiotensin II receptor antagonist with IC50 of 0.26 nM.                                                                                                                                                                                                                                                                                                                                                                                                                                                                                                                                                                                                                                                                                                                                                                                                                                                                                                                                                                                                                                                                                                                                                                                                                                                                        |
| 14 | Belinostat (PXD101)           | HDAC        | Belinostat inhibits the growth of tumor cells (A2780, HCT116, HT29, WIL, CALU-3, MCF7, PC3 and HS852) with IC50 from 0.2-0.66 $\mu$ M. PD101 shows low activity in A2780/cp70 and 2780AD cells, which are cisplatin and doxorubicin-resistant derivatives of A2780 cells. Belinostat could induce apoptosis through PARP cleavage and acetylation of histones H3/H4. Belinostat inhibits bladder cancer cell growth, especially in 5637 cells, which shows accumulation of G0-G1 phase, decrease in S phase and increase in G2-M phase. The growth inhibitory activity of belinostat on cell lines is not strongly influenced by the multidrug-resistant phenotype, whereas the activity of docetaxel is clearly affected. Belinostat could enhance the growth inhibitory activity of docetaxel or carboplatin in OVCAR-3 and A2780 cells. Belinostat also shows enhanced tubulin acetylation in ovarian cancer cell lines. A recent study shows that Belinostat activates protein kinase A in a TGF- $\beta$ signaling-dependent mechanism and decreases survivin mRNA.                                                                                                                                                                                                                                                                          |
| 15 | Semagacestat (LY450139)       | APP, NOTCH  | Semagacestat reduces the secretion of A $\beta$ 42, A $\beta$ 40 and A $\beta$ 38 from H4 human glioma cells stably overexpressing human wild-type APP into the culture medium, with IC50 of 10.9 nM, 12.1 nM and 12.0 nM, respectively, without affecting cell viability. Semagacestat also increases $\beta$ -CTF in cell lysates with ECmax of 16.0 nM, and the increase can be unexpectedly attenuated at high concentrations. Semagacestat inhibits Notch signaling with IC50 of 14.1 nM, and shows minimal Notch-sparing selectivity with Notch IC50/A $\beta$ 42 IC50 only 1.3. Semagacestat causes a concentration-dependent decrease in A $\beta$ 40 secreted into the medium with IC50 of 111 nM from murine CTX expressing endogenous murine APP, but murine A $\beta$ 42 formation in CTX is roughly 12-fold less than A $\beta$ 40 in accordance with data for neurons from wild type mice.                                                                                                                                                                                                                                                                                                                                                                                                                                          |
| 16 | NVP-ADW742                    | IGF1R       | NVP-ADW742 exhibits a 6-fold greater selectivity for IGF-1R versus InsR with IC50 of 2.8 $\mu$ M; minimal inhibitory activity against c-Kit, HER1, PDGFR, VEGFR2, or Bcr-Abl p210 with IC50 greater than 5 $\mu$ M. NVP-ADW742 significantly inhibits the serum-stimulated cell proliferation in a variety of tumor cell lines in dose-dependent manner, with IC50 values of 0.1-0.5 $\mu$ M for the multiple myeloma (MM) cell lines, and the antitumor effects on MM cells can not be overcome by the co-culture with BMSCs. NVP-ADW742 also abrogates the responsiveness of tumor cells to IL-6 in the presence of serum. In addition, NVP-ADW742 is active against MM cell lines with resistance to conventional (cytotoxic chemotherapy, dexamethasone) or investigational (thalidomide, CC-5013, TRAIL/Apo2L, PS-341) anticancer agents, as well as primary tumor cells from MM patients with multi-drug-resistant disease. NVP-ADW742 decreases the production of VEGF by tumor cells and bone marrow stromal cells, and suppresses the IGF-1-induced secretion of VEGF by various tumor types such as thyroid cancer cells or MM cells. IGF-1R inhibition by NVP-ADW742 (0.75 $\mu$ M) sensitizes MM cells or prostate cancer cells to other anticancer agents such as doxorubicin, melphalan, dexamethasone, TRAIL/Apo2L, or PS-341. [1] |
| 17 | NSC 319726                    | TP53 (R175) | NSC319726 is a p53(R175) mutant reactivator, exhibits growth inhibition in cells expressing mutant p53, with IC50 of 8 nM for p53(R175) mutant, shows no inhibition for p53 wild-type cells, shows 10- to 100-fold selectivity over the other hotspot p53 mutants. NSC319726 induces p53(R175)-mutant-dependent apoptosis. NSC319726 treatment induces a WT-like conformational change in the p53(R175) mutant protein that restores sequence-specific p53 transcription. The activity of NSC319726 depends on the zinc ion chelating properties of the compound as well as redox changes. [1]                                                                                                                                                                                                                                                                                                                                                                                                                                                                                                                                                                                                                                                                                                                                                    |
| 18 | Icotinib                      | EGFR        | Icotinib inhibits EGFR activity in a dose-dependent manner, with an IC50 value of 5 nM and complete inhibition at 62.5 nM. Icotinib selectively solely inhibits the EGFR members including the wild type and mutants with inhibition efficacies of 61-99%. Icotinib blocks EGFR-mediated intracellular tyrosine phosphorylation in human epidermoid carcinoma A431 cells in a dose-dependent manner. Meanwhile, in our proliferation assay performed on A431, BGC-823, A549, H460, HCT8, KB and Bel-7402 cell lines, we found that the relative sensitivity of cell lines to Icotinib is A431 >                                                                                                                                                                                                                                                                                                                                                                                                                                                                                                                                                                                                                                                                                                                                                   |

|    |                              |                                                         |                                                                                                                                                                                                                                                                                                                                                                                                                                                                                                                                                                                                                                                                                                                                                                                                                                                                                                                                                                                                                                                                                                                                                                                                                                                                                                                                                                                                                                                                                                                            |
|----|------------------------------|---------------------------------------------------------|----------------------------------------------------------------------------------------------------------------------------------------------------------------------------------------------------------------------------------------------------------------------------------------------------------------------------------------------------------------------------------------------------------------------------------------------------------------------------------------------------------------------------------------------------------------------------------------------------------------------------------------------------------------------------------------------------------------------------------------------------------------------------------------------------------------------------------------------------------------------------------------------------------------------------------------------------------------------------------------------------------------------------------------------------------------------------------------------------------------------------------------------------------------------------------------------------------------------------------------------------------------------------------------------------------------------------------------------------------------------------------------------------------------------------------------------------------------------------------------------------------------------------|
|    |                              |                                                         | BGC-823 > A549 > H460 > KB > HCT8 and Bel-7402. Icotinib exhibits a broad spectrum of antitumor activity and it is especially effective against tumors expressing higher levels of EGFR. [1]                                                                                                                                                                                                                                                                                                                                                                                                                                                                                                                                                                                                                                                                                                                                                                                                                                                                                                                                                                                                                                                                                                                                                                                                                                                                                                                               |
| 19 | Iloprost (GM6001, Galardin)  | MMP1, MMP2, MMP3, MMP7, MMP8, MMP9, MMP12, MMP14, MMP26 | Iloprost (GM6001, Galardin) is a broad spectrum matrix metalloprotease (MMP) inhibitor for MMP-1, MMP-2, MMP-3, MMP-7, MMP-8, MMP-9, MMP-12, MMP-14, and MMP-26 with Ki of 0.4 nM, 0.5 nM, 27 nM, 3.7 nM, 0.1 nM, 0.2 nM, 3.6 nM, 13.4 nM, 0.36 nM, respectively.                                                                                                                                                                                                                                                                                                                                                                                                                                                                                                                                                                                                                                                                                                                                                                                                                                                                                                                                                                                                                                                                                                                                                                                                                                                          |
| 20 | Rivaroxaban                  | F10                                                     | Rivaroxaban is an oral, direct inhibitor of Factor Xa (FXa), being developed for the prevention and treatment of arterial and venous thrombosis with a Ki of 0.4 nM. Rivaroxaban also inhibits prothrombinase activity with IC50 of 2.1 nM. Rivaroxaban also shows a similar affinity to purified human and rabbit FXa (IC50 0.7 nM and 0.8 nM, respectively), but a lesser potency against purified rat FXa (IC50 3.4 nM). Endogenous human and rabbit FXa in plasma is inhibited to a similar extent by Rivaroxaban (IC50 21 nM and 21 nM, respectively), while 14-fold higher concentrations are required in rat plasma (IC50 290 nM). Rivaroxaban exhibits high permeability and polarized transport across Caco-2 cells as a substrate of the P-gp, but exhibits no inhibitory effect on P-gp-mediated drug transport up to concentrations of 100 µM in-vitro.                                                                                                                                                                                                                                                                                                                                                                                                                                                                                                                                                                                                                                                        |
| 21 | STF-118804                   | NAMPT                                                   | STF-118804 reduces the viability of B-ALL cell lines containing MLL chromosomal translocations, with IC50 values in the low nanomolar range. In addition, leukemic samples from five pediatric ALL patients are also sensitive to STF-118804 in the low nanomolar range. STF-118804 induces leukemia MV411 cell apoptosis without antecedent cell cycle arrest.                                                                                                                                                                                                                                                                                                                                                                                                                                                                                                                                                                                                                                                                                                                                                                                                                                                                                                                                                                                                                                                                                                                                                            |
| 22 | Rimonabant                   | CNR1                                                    | Rimonabant dose-dependently reduces ACAT activity in Raw264.7 macrophages with IC50 of 2.9 µM and isolated peritoneal macrophages. Rimonabant inhibits ACAT activity in intact CHO-ACAT1 and CHO-ACAT2 cells and in cell-free assays with approximately equal efficiency with IC50 of 1.5 µM and 2.2 µM for CHO-ACAT1 and CHO-ACAT2, respectively. Consistent with ACAT inhibition, Rimonabant treatment blocks ACAT dependent processes in macrophages, oxysterol-induced apoptosis and acetylated-LDL induced foam cell formation. Rimonabant antagonizes the inhibitory effects of cannabinoid receptor agonists on both mouse vas deferens contractions and adenylyl cyclase activity in rat brain membranes in a concentration-dependent manner. Rimonabant significantly reduces cell growth and induces cell death of human colorectal cancer cells (DLD-1, CaCo-2 and SW620). Rimonabant is able to alter cell cycle distribution in all the cell lines tested. Particularly, Rimonabant produces a G2/M cell cycle arrest in DLD-1 cells without inducing apoptosis or necrosis.                                                                                                                                                                                                                                                                                                                                                                                                                                  |
| 23 | FLI-06                       |                                                         | FLI-06 is a novel inhibitor of Notch signaling with EC50 of 2.3 µM.                                                                                                                                                                                                                                                                                                                                                                                                                                                                                                                                                                                                                                                                                                                                                                                                                                                                                                                                                                                                                                                                                                                                                                                                                                                                                                                                                                                                                                                        |
| 24 | Sitaxentan sodium            | EDNRA                                                   | Sitaxentan sodium is a selective endothelin A receptor (ETA) antagonist with IC50 and Ki of 1.4 nM and 0.43 nM, respectively, exhibits 7000-fold selectivity over ETB. Phase 3.                                                                                                                                                                                                                                                                                                                                                                                                                                                                                                                                                                                                                                                                                                                                                                                                                                                                                                                                                                                                                                                                                                                                                                                                                                                                                                                                            |
| 25 | ABT-263 (Navitoclax)         | BCL2, BCL2L1, BCL2L2                                    | ABT-263 is structurally related to ABT-737; it is a disruptor of Bcl-2/Bcl-xL interactions with pro-apoptotic proteins. Overexpression of the prosurvival Bcl-2 family members is commonly associated with tumor maintenance, progression, and chemoresistance. ABT-263 displays the protection afforded by overexpression of Bcl-2 or Bcl-xL with EC50 values of 60 nM and 20 nM, respectively. A wide range of cellular activity is observed with ABT-263 having a 50% growth inhibition (EC50) of 110 nM against the most sensitive line (H146), whereas its activity in the least sensitive line (H82) results in an EC50 at 22 µM. All four cell lines with EC50 values of <400 nM (H146, H889, H1963, and H1417) are also highly sensitive to ABT-737, and the two most resistant lines (H1048 and H82) are similarly resistant to ABT-263.                                                                                                                                                                                                                                                                                                                                                                                                                                                                                                                                                                                                                                                                          |
| 26 | Brinzolamide                 | CA2                                                     | Brinzolamide is a potent carbonic anhydrase II inhibitor with IC50 of 3.19 nM.                                                                                                                                                                                                                                                                                                                                                                                                                                                                                                                                                                                                                                                                                                                                                                                                                                                                                                                                                                                                                                                                                                                                                                                                                                                                                                                                                                                                                                             |
| 27 | Nilotinib (AMN-107)          | ABL1                                                    | Nilotinib inhibits proliferation, migration, and actin filament formation, as well as the expression of α-SMA and collagen in activated HSCs. Nilotinib induces apoptosis of HSCs, which is correlated with reduced bcl-2 expression, increases p53 expression, cleavage of PARP, as well as increases expression of PPARγ and TRAIL-R. Nilotinib also induces cell cycle arrest, accompanied by increased expression of p27 and downregulation of cyclin D1. Interestingly, Nilotinib not only inhibits activation of PDGFR, but also TGFβII through Src. Nilotinib significantly inhibits PDGF and TGFβ-simulated phosphorylation of ERK and Akt. Furthermore, PDGF- and TGFβ-activated phosphorylated form(s) of Abl in human HSCs are inhibited by Nilotinib. Nilotinib inhibits most imatinib-resistant Bcr-Abl mutations, except for T315I. Nilotinib inhibits PDGF-DD-mediated ERK1/2 activation, basal and PDGF-DD-mediated activation of PDGFRβ and Akt, and schwannoma proliferation. Nilotinib is more potent than imatinib, exerting its maximal inhibitory effect at concentrations lower than steady-state trough plasma levels. Nilotinib also significantly reduces the expression levels of the genes for TGF-β1 and platelet-derived growth factor (PDGF). Nilotinib treatment also significantly inhibits the PDGF-induced proliferation of lung fibroblasts. Nilotinib inhibits the proliferation of Ba/F3 cells expressing p210- and p190-Bcr-Abl, or K562 and Ku-812F cells with IC50 values ≤12 nM. |
| 28 | Tranylcypromine (2-PCPA) HCl | MAO, CYP2A6                                             | R-(+)-Tranylcypromine, (±)-Tranylcypromine, and S-(-)-Tranylcypromine competitively inhibits CYP2A6-mediated metabolism of nicotine with apparent Ki values of 0.05 µM, 0.08 µM, and 2.0 µM, respectively, in human liver microsomes. Tranylcypromine (500 µg/mL) severely inhibits bradykinin-stimulated arachidonic acid                                                                                                                                                                                                                                                                                                                                                                                                                                                                                                                                                                                                                                                                                                                                                                                                                                                                                                                                                                                                                                                                                                                                                                                                 |

|    |                        |                                                                                                                                             |                                                                                                                                                                                                                                                                                                                                                                                                                                                                                                                                                                                                                                                                                                                                                                                                                                                                                                                                                                                                                                                                                                                         |
|----|------------------------|---------------------------------------------------------------------------------------------------------------------------------------------|-------------------------------------------------------------------------------------------------------------------------------------------------------------------------------------------------------------------------------------------------------------------------------------------------------------------------------------------------------------------------------------------------------------------------------------------------------------------------------------------------------------------------------------------------------------------------------------------------------------------------------------------------------------------------------------------------------------------------------------------------------------------------------------------------------------------------------------------------------------------------------------------------------------------------------------------------------------------------------------------------------------------------------------------------------------------------------------------------------------------------|
|    |                        |                                                                                                                                             | release in calf aortic endothelial cells. Tranylcypromine inhibits CYP2A6 and CYP2E1 activity with IC50 of 0.42 $\mu$ M and 3 $\mu$ M, respectively, in human liver microsomes. Tranylcypromine induces type II and cyclopropylbenzene type I difference spectrum in human liver microsomes.                                                                                                                                                                                                                                                                                                                                                                                                                                                                                                                                                                                                                                                                                                                                                                                                                            |
| 29 | Tandutinib (MLN518)    | FLT3, PDGFR KIT                                                                                                                             | Tandutinib has little activity against EGFR, FGFR, KDR, InsR, Src, Abl, PKC, PKA and MAPKs. Tandutinib inhibits IL-3-independent cell growth and FLT3-ITD autophosphorylation with an IC50 of 10-100 nM. Tandutinib also inhibits the proliferation of human leukemia Ba/F3 cells containing FLT3-ITD mutations with IC50 values of 10-30 nM, and the FLT3-ITD-positive Molm-13 and Molm-14 cells with an IC50 of 10 nM. In FLT3-ITD-positive Molm-14 cells but not the FLT3-ITD-negative THP-1 cells, Tandutinib treatment leads to significant apoptosis by 51% and 78% at 24 and 96 hours, respectively, due to specific FLT3 inhibition. Tandutinib preferentially inhibits the growth of blast colonies from FLT3 ITD-positive compared with ITD-negative patients with AML, without affecting colony formation by normal human progenitor cells.                                                                                                                                                                                                                                                                  |
| 30 | Zebularine             | DNMT1, DNMT3A, DNMT3B                                                                                                                       | Zebularine is a cytidine analogue containing a 2-(1H)-pyrimidinone ring, originally synthesized as a cytidine deaminase inhibitor. Zebularine is shown to form a tight, covalent complex with bacterial methyltransferases. In <i>N. crassa</i> , zebularine inhibits DNA methylation and reactivates a gene previously silenced by methylation. Zebularine is a global inhibitor of DNA methylation, similar to 5-Aza-CR, rather than a selective inhibitor. Zebularine induces the myogenic phenotype in 10T1/2 cells, which is a phenomenon unique to DNA methylation inhibitors. Zebularine reactivates a silenced p16 gene and demethylates its promoter region in T24 bladder carcinoma cells. Zebularine is only slightly cytotoxic to T24 cells. Zebularine is preferentially incorporated into DNA and exhibits greater cell growth inhibition and gene expression in cancer cell lines compared to normal fibroblasts. In addition, zebularine preferentially depletes DNA methyltransferase 1 (DNMT1) and induces expression of cancer-related antigen genes in cancer cells relative to normal fibroblasts. |
| 31 | MLN8054                | AURKA                                                                                                                                       | MLN8054 is an ATP-competitive, reversible inhibitor of recombinant Aurora A kinase with an IC50 of 4 nM, which shows >40-fold more selective inhibitory activity for Aurora A compared with Aurora B. In-vitro, MLN8054 exhibits the activity of growth inhibition across various cell lines from diverse tissue origins with IC50 values ranging from 0.11 $\mu$ M to 1.43 $\mu$ M. In addition, MLN8054 selectively inhibits Aurora A over Aurora B in cultured cells, and inhibits cell proliferation by promoting G2/M accumulation and spindle defects in multiple cultured human tumor cell lines. A recent study shows that MLN8054 sensitizes androgen-resistant prostate cancer to radiation by inhibiting Aurora A kinase, which is associated with sustained DNA double-strand breaks.                                                                                                                                                                                                                                                                                                                       |
| 32 | PR-619                 | ATXN7L3, BAP1, OTUB1, OTUD1, OTUD6A, OTUB7A, UBB, UCHL3, USP1, USP2, USP4, USP5, USP7, USP8, USP14, USP15, USP17, USP26, USP30, USP36, YOD1 | PR-619 is a cell-permeable pyridinamine class broad-spectrum DUB inhibitor whose known targets include ATXN3, BAP1, JOSD2, OTUD5, UCH-L1, UCH-L3, UCH-L5/UCH37, USP1, 2, 4, 5, 7, 8, 9X, 10, 14, 15, 16, 19, 20, 22, 24, 28, 47, 48, VCIP135, YOD1, as well as deISGylase PLpro, deNEDDylase DEN1, and deSUMOlyase SENP6. PR-619 are shown to increase overall protein polyubiquitination in HEK293T cells in a dose- and time-dependent manner (20 to 150 $\mu$ M, 0.5 to 20 h). PR619 treatment results in upregulation of both K 48 - and K63-linked polyUb chains. PR-619 induces HCT116 cell death with EC50 values of 6.3 $\mu$ M.[1]                                                                                                                                                                                                                                                                                                                                                                                                                                                                             |
| 33 | Roxatidine Acetate HCl | HRH2                                                                                                                                        | Roxatidine Acetate HCl is a specific and competitive histamin H2-receptor antagonist, with IC50 of 3.2 $\mu$ M, inhibits gastric acid secretion and ulcer formation.                                                                                                                                                                                                                                                                                                                                                                                                                                                                                                                                                                                                                                                                                                                                                                                                                                                                                                                                                    |
| 34 | GSK1904529A            | IGF1R, INSR                                                                                                                                 | GSK1904529A is a reversible, ATP-competitive inhibitor and has enzyme-inhibitor binding values against IGF-1R and IR with Ki of 1.6 nM and 1.3 nM, respectively. GSK1904529A potently inhibits the ligand-induced phosphorylation of IGF-1R and IR at concentrations above 0.01 $\mu$ M, followed by blocking downstream signaling (AKT, IRS-1, and ERK). GSK1904529A potently inhibits NIH-3T3/LISN, TC-71, SK-N-MC, SK-ES RD-ES cells with IC50 of 60 nM, 35 nM, 43 nM, 61 nM and 62 nM, respectively. GSK1904529A also inhibits other multiple myeloma and Ewing's sarcoma cell lines including NCI-H929, MOLP-8, LP-1 and KMS-12-BM etc. GSK1904529A induces cell cycle arrest at the G1 phase in cell lines COLO 205, MCF-7, and NCI-H929, which are sensitive to GK1904529A.                                                                                                                                                                                                                                                                                                                                      |
| 35 | Atorvastatin Calcium   | HMGCR                                                                                                                                       | Atorvastatin inhibits pre-proET-1 mRNA expression in a concentration- and time-dependent fashion (60-70% maximum inhibition) and reduces immunoreactive ET-1 levels (25-50%), this inhibitory effect is maintained in the presence of oxidized LDL (1-50 mg/mL). Atorvastatin significantly reduces angiotensin II-induced and epidermal growth factor-induced ROS production in VSMCs. Atorvastatin downregulates mRNA expression of the NAD(P)H oxidase subunit nox1 in VSMCs, whereas p22phox mRNA expression is not significantly altered. Atorvastatin inhibits membrane translocation of rac1 GTPase, which is required for the activation of NAD(P)H oxidase. Atorvastatin (0.1 $\mu$ M) significantly diminishes NF- $\kappa$ B activation induced by Ang II and TNF- $\alpha$ in mononuclear cells and VSMC. Atorvastatin (1 $\mu$ M) diminishes MCP-1 expression induced by Ang II, TNF- $\alpha$ and is reversed by Mevalonate only in                                                                                                                                                                       |

|    |                               |                     |                                                                                                                                                                                                                                                                                                                                                                                                                                                                                                                                                                                                                                                                                                                                                                                                                                                                                                                                                                                                                                                                                                                                                                                                                                                                                                                                                                                                                                                                                                                                                                                                                                                                                                                                                                                                                                                                                                                                             |
|----|-------------------------------|---------------------|---------------------------------------------------------------------------------------------------------------------------------------------------------------------------------------------------------------------------------------------------------------------------------------------------------------------------------------------------------------------------------------------------------------------------------------------------------------------------------------------------------------------------------------------------------------------------------------------------------------------------------------------------------------------------------------------------------------------------------------------------------------------------------------------------------------------------------------------------------------------------------------------------------------------------------------------------------------------------------------------------------------------------------------------------------------------------------------------------------------------------------------------------------------------------------------------------------------------------------------------------------------------------------------------------------------------------------------------------------------------------------------------------------------------------------------------------------------------------------------------------------------------------------------------------------------------------------------------------------------------------------------------------------------------------------------------------------------------------------------------------------------------------------------------------------------------------------------------------------------------------------------------------------------------------------------------|
|    |                               |                     | Ang II-stimulated cells. Atorvastatin (1 $\mu$ M) diminishes IP-10 expression induced by Ang II and by TNF- $\alpha$ in VSMC, and this reduction is partially reversed by Mevalonate. Atorvastatin and Gemfibrozil metabolites, but not the parent drugs, are potent antioxidants against lipoprotein oxidation.                                                                                                                                                                                                                                                                                                                                                                                                                                                                                                                                                                                                                                                                                                                                                                                                                                                                                                                                                                                                                                                                                                                                                                                                                                                                                                                                                                                                                                                                                                                                                                                                                            |
| 36 | SNS-032 (BMS-387032)          | CDK2                | SNS-032 has low sensitivity to CDK1 and CDK4 with IC50 of 480 nM and 925 nM, respectively. SNS-032 effectively kills chronic lymphocytic leukemia cells in-vitro regardless of prognostic indicators and treatment history. Compared with flavopiridol and roscovitine, SNS-032 is more potent, both in inhibition of RNA synthesis and at induction of apoptosis. SNS-032 activity is readily reversible; removal of SNS-032 reactivates RNA polymerase II, which led to resynthesis of Mcl-1 and cell survival. SNS-032 inhibits three dimensional capillary network formations of endothelial cells. SNS-032 completely prevents U87MG cell-mediated capillary formation of HUVECs. In addition, SNS-032 significantly prevents the production of VEGF in both cell lines, SNS-032 prevents in-vitro angiogenesis, and this action is attributable to blocking of VEGF. Preclinical studies have shown that SNS-032 induces cell cycle arrest and apoptosis across multiple cell lines. SNS-032 blocks the cell cycle via inhibition of CDKs 2 and 7, and transcription via inhibition of CDKs 7 and 9. SNS-032 activity is unaffected by human serum. SNS-032 induces a dose-dependent increase in annexin V staining and caspase-3 activation. At the molecular level, SNS-032 induces a marked dephosphorylation of serine 2 and 5 of RNA polymerase (RNA Pol) II and inhibits the expression of CDK2 and CDK9 and dephosphorylated CDK7.                                                                                                                                                                                                                                                                                                                                                                                                                                                                                             |
| 37 | Naltrexone HCl                | OPRK1, OPRM1, OPRD1 | Naltrexone (0.32 mg/kg) reduces ethanol-reinforced responding at the concentration that maintained the most responding (1% or 2%) in rhesus monkeys. Naltrexone (0.1 mg/kg) reduces ethanol-reinforced responding, both at a low ethanol concentration (0.25%) that produced little ethanol intake (g/kg), and at a higher concentration (4%) with an appreciable intake. Naltrexone (1-3 mg/kg) potently and dose-dependently inhibits reinstatement of ethanol-seeking produced by non-contingent deliveries of the liquid dipper filled with 8% ethanol. Naltrexone elicits optimal enhancement of morphine's antinociceptive potency in mice when co-administered (i.p.) at about 100 ng/kg together with morphine (3 mg/kg). Naltrexone (10 ng/kg i.p.) augments the antinociception produced by an acute submaximal dose of intrathecal (5 mg) or systemic (7.5 mg/kg i.p.) morphine in the tail-flick test in rats. Naltrexone combined with Morphine inhibits the decline in morphine antinociception and prevented the loss of morphine potency in rats. Naltrexone significantly suppresses ethanol self-administration and prevents ethanol-induced increases in dialysate dopamine levels. Naltrexone completely prevents the reduction in anogenital distance in prenatally stressed (PS) males and restores the growth rate of both sexes. Naltrexone also decreases the anxiety of PS rats in the plus-maze, increases the opioid component of exploration to control levels, but increases anxiety in control males.                                                                                                                                                                                                                                                                                                                                                                                                        |
| 38 | Ganetespib (STA-9090)         | HSP90               | The 50% inhibitory concentrations (IC50) for Ganetespib against malignant mast cell lines are 10-50 times lower than that for 17-AAG, indicating that triazolone class of HSP90 inhibitors likely exhibits greater potency than geldanamycin based inhibitors. Ganetespib inhibits MG63 cell lines with IC50 of 43 nM. Ganetespib binds to the ATP-binding domain at the N-terminus of Hsp90 and serves as a potent Hsp90 inhibitor by causing degradation of multiple oncogenic Hsp90 client proteins including HER2/neu, mutated EGFR, Akt, c-Kit, IGF-1R, PDGFR $\alpha$ , Jak1, Jak2, STAT3, STAT5, HIF-1 $\alpha$ , CDC2 and c-Met as well as Wilms' tumor 1. Ganetespib, at low nanomolar concentrations, potently arrests cell proliferation and induces apoptosis in a wide variety of human cancer cell lines, including many receptor tyrosine kinase inhibitor- and tanespimycin-resistant cell lines. Ganetespib exhibits potent cytotoxicity in a range of solid and hematologic tumor cell lines, including those that express mutated kinases that confer resistance to small-molecule tyrosine kinase inhibitors. Ganetespib treatment rapidly caused the degradation of known Hsp90 client proteins, exhibits superior potency to the ansamycin inhibitor 17-AAG, and shows sustained activity even with short exposure times. In another study, Ganetespib induces apoptosis of malignant canine mast cell lines. Ganetespib is active at significantly lower concentrations for C2 and BR canine malignant mast cells with IC50 of 19 and 4 nM, respectively, while 17-AAG inhibits C2 and BR canine malignant mast cells with IC50 of 958 and 44 nM, respectively. Both the expression of WT and mutant Kit are downregulated by 100 nM Ganetespib after 24 hours in all lines treated including C2 and BMCMCs cells. However, no effects on PI3K or HSP90 expression are observed following treatment with Ganetespib. |
| 39 | CGS 21680 HCl                 | ADORA2A             | CGS 21680 HCl is an adenosine A2 receptor agonist with IC50 of 22 nM, exhibits 140-fold over A1 receptor. In an isolated perfused working rat heart model, CGS 21680C effectively increases coronary flow with an ED25 value of 1.8 nM. CGS 21680 binds adenosine A2 receptor with high affinity (Kd = 15.5 nM) and limited capacity (apparent Bmax = 375 fmol/mg of protein) to a single class of recognition sites. In hippocampal slices, CGS 21680 acts as weak agonist on pre- and postsynaptic measures of electrophysiological activity (putative A1 receptor mediated events) and is ineffective at stimulating the formation of cAMP (a putative A2 mediated response). In striatal slices, CGS 21680 potently stimulates the formation of cAMP with an EC50 of 110 nM but is ineffective at inhibiting electrically stimulated dopamine release. CGS 21680A is the hydrochloride salt, while CGS 21680C is the sodium salt of CGS 21680.                                                                                                                                                                                                                                                                                                                                                                                                                                                                                                                                                                                                                                                                                                                                                                                                                                                                                                                                                                                          |
| 40 | Vemurafenib (PLX4032, RG7204) | BRAF (V600E)        | PLX4032 inhibits B-RAFV600E, C-RAF, as well as wildtype B-RAF, with IC50 of 31 nM, 48 nM and 100 nM, respectively. PLX4032 also inhibits several non-RAF kinases, including ACK1, KHS1, and SRMS, with IC50 of 18 nM to 51 nM. In melanoma cell                                                                                                                                                                                                                                                                                                                                                                                                                                                                                                                                                                                                                                                                                                                                                                                                                                                                                                                                                                                                                                                                                                                                                                                                                                                                                                                                                                                                                                                                                                                                                                                                                                                                                             |

|    |                          |              |                                                                                                                                                                                                                                                                                                                                                                                                                                                                                                                                                                                                                                                                                                                                                                                                                                                                                                                                                                                                                                                                                                                                                                                                                                                                                                                                                                                                                                                                                                                                        |
|----|--------------------------|--------------|----------------------------------------------------------------------------------------------------------------------------------------------------------------------------------------------------------------------------------------------------------------------------------------------------------------------------------------------------------------------------------------------------------------------------------------------------------------------------------------------------------------------------------------------------------------------------------------------------------------------------------------------------------------------------------------------------------------------------------------------------------------------------------------------------------------------------------------------------------------------------------------------------------------------------------------------------------------------------------------------------------------------------------------------------------------------------------------------------------------------------------------------------------------------------------------------------------------------------------------------------------------------------------------------------------------------------------------------------------------------------------------------------------------------------------------------------------------------------------------------------------------------------------------|
|    |                          |              | lines, the inhibitory effect by PLX4032 depends on B-RAF mutational status, because PLX4032 potently inhibits those harboring B-RAF V600 mutants, including V600E, V600D, V600K, and V600R, but not wildtype or other mutants. The IC50 values of PLX4032 on these cells, including MALME-3M, Colo829, Colo38, A375, SK-MEL28, and A2058, ranges from 20 nM to 1 $\mu$ M. In these cells, PLX4032 (0.1 $\mu$ M to 30 $\mu$ M) also inhibits the phosphorylation of both MEK1/2 and ERK1/2. PLX4032 is highly effective in the treatment of melanoma, for its ability of inhibiting B-RAFV600E. However, PLX4032 displays limited effect in colon cancer patients that also carrying B-RAFV600E oncoprotein. The reason for this is that, in colon cancer cells, B-RAFV600E inhibition by PLX4032 results in a rapid feedback EGFR activation, which compensates for the PLX4032-inhibited cell proliferation.                                                                                                                                                                                                                                                                                                                                                                                                                                                                                                                                                                                                                          |
| 41 | Pancuronium dibromide    |              | Pancuronium results in open channel block of embryonic-type nicotinic acetylcholine receptor channels after coapplication of blocker and acetylcholine, characterized by decrease of the time constant of current decay. Pancuronium also results in competitive block of embryonic-type nicotinic acetylcholine receptor channels. Pancuronium increases heart rate, vecuronium and rocuronium produces positive inotropic effects, and vecuronium shortens refractoriness in isolated rat atria. Pancuronium (0.5 mM) induces a complete fade of the tetanic contraction while leaving the twitch unaffected in the extensor digitorum longus muscle of the rat. Pancuronium decreases the amplitude and increases the tetanic rundown of trains of endplate potentials (e.p.ps) evoked in the frequency of 50 Hz in the extensor digitorum longus muscle of the rat.                                                                                                                                                                                                                                                                                                                                                                                                                                                                                                                                                                                                                                                                |
| 42 | Loratadine               | HRH1         | Loratadine is identified as a selective inhibitor of B(0)AT2 with an IC50 of 4 $\mu$ M while being less active or inactive against several other members of the SLC6 family. Loratadine concentration-dependently inhibits the release of histamine and LTC4 when preincubating before Der p 1 antigen or anti-Fc epsilon RI challenge in human Fc epsilon RI+ cells. Loratadine (0.1 mM) also inhibits (10-40%) histamine, LTC4, and PGD2 release from purified HLMC (16-68%) activated by anti-Fc epsilon RI. Loratadine causes concentration-dependent inhibition (10-40%) of histamine, tryptase, LTC4, and PGD2 release from purified HSMC (24-72%) immunologically challenged with anti-Fc epsilon RI. Loratadine inhibits significantly IL-6 and IL-8 secretion induced by histamine with a more powerful efficiency of the active metabolite in human umbilical vein endothelial cells (HUVEC). Loratadine blocks hKv1.5 channels in a concentration-, voltage-, time- and use-dependent manner but only at concentrations much higher than therapeutic plasma levels in man in Ltk- cells transfected with the gene encoding hKv1.5 channels. Loratadine inhibits rhinovirus-induced ICAM-1 upregulation in both primary bronchial or transformed (A549) respiratory epithelial cells. Loratadine also inhibits ICAM-1 mRNA induction caused by rhinovirus infection in a dose-dependent manner, and they completely inhibits rhinovirus-induced ICAM-1 promoter activation.                                                  |
| 43 | PNU-120596               |              | PNU-120596 increases agonist (ACh)-evoked calcium flux mediated by an engineered variant of the human $\alpha$ 7 nAChR. PNU-120596 increases agonists (choline and ACh)-evoked currents mediated by wild-type receptors and also demonstrates a pronounced prolongation of the evoked response in the continued presence of agonist in <i>Xenopus</i> oocytes. PNU-120596 increases the channel mean open time of $\alpha$ 7 nAChRs but has no effect on ion selectivity and relatively little, if any, effect on unitary conductance. When applied to acute hippocampal slices, PNU-120596 increases the frequency of ACh-evoked GABAergic postsynaptic currents measured in pyramidal neurons; this effect is suppressed by TTX, suggesting that PNU-120596 modulates the function of $\alpha$ 7 nAChRs located on the somatodendritic membrane of hippocampal interneurons. Besides the positive modulation to $\alpha$ 7 nAChR, PNU-120596 induces a profound retardation of the kinetics of desensitization, raising the potential of Ca2+-induced toxicity through excessive stimulation of $\alpha$ 7 nAChR. PNU-120596 causes changes in cysteine accessibility at the inner beta sheet, transition zone and agonist binding site while binding to $\alpha$ 7 nAChR. Binding sites for PNU-120596 are not in the agonist-binding sites and PNU-120596 enhances agonist-evoked gating of nicotinic receptors by eliciting conformational effects that are similar but nonidentical to the gating conformations promoted by ACh. |
| 44 | Ruxolitinib (INCB018424) | JAK1, JAK2   | INCB018424 potently and selectively inhibits JAK2V617F-mediated signaling and proliferation in Ba/F3 cells and HEL cells. INCB018424 markedly increases apoptosis in a dose dependent manner in Ba/F3 cells. INCB018424 (64 nM) results in a doubling of cells with depolarized mitochondria in Ba/F3 cells. INCB018424 inhibits proliferating of erythroid progenitors from normal donors and polycythemia vera patients with IC50 of 407 nM and 223 nM, respectively. INCB018424 demonstrates remarkable potency against erythroid colony formation with IC50 of 67nM.                                                                                                                                                                                                                                                                                                                                                                                                                                                                                                                                                                                                                                                                                                                                                                                                                                                                                                                                                               |
| 45 | GW3965 HCl               | NR1H3, NR1H2 | GW3965 recruits the steroid receptor coactivator 1 to human LXR $\alpha$ with EC50 of 125 nM in a cell-free ligand-sensing assay. GW3965 shows a potent antagonistic activity against hLXR $\alpha$ and hLXR $\beta$ in cell-based assays with EC50 of 190 nM and 30 nM, respectively. Besides, GW3965 also shows excellent selectivity over other nuclear receptors. In human islets, GW3965 (1 $\mu$ M) reduces expression of selected pro-inflammatory cytokines including IL-8, monocyte chemoattractant protein-1 and tissue factor.                                                                                                                                                                                                                                                                                                                                                                                                                                                                                                                                                                                                                                                                                                                                                                                                                                                                                                                                                                                              |
| 46 | AZD6482                  | PIK3CB       | AZD6482 also inhibits PI3K $\alpha$ , $\gamma$ , and $\delta$ , with IC50 of 80 nM to 1.09 $\mu$ M, which are significantly lower than its (+)-enantiomer (S-form). AZD6482 is an antiplatelet agent; it blocks platelet activation/adhesion/aggregation and promotes platelet disaggregation in assay of washed platelet aggregation (WPA), with an IC50 value of                                                                                                                                                                                                                                                                                                                                                                                                                                                                                                                                                                                                                                                                                                                                                                                                                                                                                                                                                                                                                                                                                                                                                                     |



|    |                     |             |                                                                                                                                                                                                                                                                                                                                                                                                                                                                                                                                                                                                                                                                                                                                                                                                                                                                                                                                                                                                                                                                                                                                                                                                                                                                                                                                                                                                                                                                                                                                                                                                                                                                                                                                                                                                                                                                                             |
|----|---------------------|-------------|---------------------------------------------------------------------------------------------------------------------------------------------------------------------------------------------------------------------------------------------------------------------------------------------------------------------------------------------------------------------------------------------------------------------------------------------------------------------------------------------------------------------------------------------------------------------------------------------------------------------------------------------------------------------------------------------------------------------------------------------------------------------------------------------------------------------------------------------------------------------------------------------------------------------------------------------------------------------------------------------------------------------------------------------------------------------------------------------------------------------------------------------------------------------------------------------------------------------------------------------------------------------------------------------------------------------------------------------------------------------------------------------------------------------------------------------------------------------------------------------------------------------------------------------------------------------------------------------------------------------------------------------------------------------------------------------------------------------------------------------------------------------------------------------------------------------------------------------------------------------------------------------|
|    |                     |             | 6 nM. Furthermore, by targeting PI3K $\beta$ , AZD6482 specifically inhibits thrombosis without interfering with normal haemostasis. Therefore, AZD6482 is used as an anti-thrombotic drug for the prophylaxis of thrombotic disorders.                                                                                                                                                                                                                                                                                                                                                                                                                                                                                                                                                                                                                                                                                                                                                                                                                                                                                                                                                                                                                                                                                                                                                                                                                                                                                                                                                                                                                                                                                                                                                                                                                                                     |
| 47 | SB705498            | TRPV1       | SB705498 (0.3 nM-1 $\mu$ M) potently inhibits capsaicin-induced activation of human TRPV1 expressed in 1321N1 cells or HEK293 cells with apparent pKi of 7.5 or 7.6, respectively. Coapplication of 100 nM SB705498 rapidly, completely and reversibly inhibits hTRPV1 expressed in HEK293 cells. SB705498 has no significant effect on endogenous [Ca <sup>2+</sup> ] responses in HEK293 cells produced by muscarinic acetylcholine receptor activation with carbachol or store-operated channel-mediated Ca <sup>2+</sup> entry after depletion of intracellular stores with the Ca <sup>2+</sup> pump inhibitor thapsigargin. SB705498 (10 pM-1 $\mu$ M) also has no significant antagonist effect versus the close TRPV1 receptor paralog TRPV4 transiently expressed in HEK293 cells and activated using the synthetic ligand 4 $\alpha$ -phorbol-12,13-didecanoate (10 $\mu$ M). SB705498 reveals good antagonist potency against both the rat and guinea pig TRPV1. SB705498 antagonizes rat and guinea pig TRPV1 with pKi of 7.5 and 7.3, respectively. Coapplication of 100 nM to 10 $\mu$ M SB705498 to the steady state of a maintained capsaicin response leads to rapid and complete inhibition of hTRPV1 at -70 mV. SB705498 inhibits capsaicin-mediated activation of hTRPV1 with IC <sub>50</sub> of 3 nM and 17 nM at positive and negative holding potentials (-70 mV and +70 mV), respectively. Coapplication of 1 $\mu$ M SB705498 to the plateau period of the response produces complete and reversible inhibition of the TRPV1-mediated conductance. SB705498 shows approximately equal activity versus multiple and diverse chemical and physical modes of TRPV1 receptor activation. SB705498 shows little or no activity versus a wide range of ion channels, receptors and enzymes. SB705498 produces full blockade of heat as well as pH activation of hTRPV1. |
| 48 | Safinamide Mesylate | MAOB, MAOA  | Safinamide is a highly selective MAO-B inhibitor in rat brain mitochondria, with an IC <sub>50</sub> of 98 nM. Safinamide inhibits MAO-B in human brain with an IC <sub>50</sub> of 9 nM. Safinamide has high affinity for the Na <sup>+</sup> channel-binding site II in rat cortical membranes, with an IC <sub>50</sub> of 8 $\mu$ M. Safinamide inhibits the fast Na <sup>+</sup> currents in a concentration- and state-dependent manner in rat cortical neurons. Safinamide blocks N-Type Ca <sup>2+</sup> currents in rat cortical neurons with IC <sub>50</sub> of 23 $\mu$ M. Safinamide inhibits glutamate release induced by depolarizing conditions in rat hippocampal synaptosomes with IC <sub>50</sub> of 9 $\mu$ M. Safinamide incubated 1 hour before veratridine reduces the neuron damage with an IC <sub>50</sub> 1.4 $\mu$ M through blockade of opening voltage-dependent Na <sup>+</sup> and Ca <sup>2+</sup> channels in rat primary cortical neurons. Safinamide binds to human MAO B with a Ki of 0.5 $\mu$ M. Safinamide binds to human MAO B in an extended conformation occupying both flavin and entrance cavity.                                                                                                                                                                                                                                                                                                                                                                                                                                                                                                                                                                                                                                                                                                                                             |
| 49 | Tenofovir           |             | Tenofovir reduces the viral cytopathic effect of HIV-1(IIIB), HIV-2(ROD) and HIV(EHO) with EC <sub>50</sub> of 1.15 $\mu$ g/mL, 1.12 $\mu$ g/mL and 1.05 $\mu$ g/mL in MT-4 cells. Tenofovir also reduces the viral cytopathic effect of SIV(mac251) , SIV(B670) ,SHIV(89.6) and SHIV(RTSHIV). Tenofovir is uniquely active against multinucleoside-resistant HIV expressing the Q151M mutation, but shows reduced susceptibility to the T69S insertion mutations. Tenofovir inhibits hepatitis B virus (HBV) activity in HepG2 2.2.15, HepAD38 and HepAD79 cells. Tenofovir (4 $\mu$ M) completely inhibits the growth of HIVIIIB in MT-2 cells. Tenofovir inhibits synthesis of negative strand strong-stop DNA with IC <sub>50</sub> of 9 $\mu$ M for wild-type RT, 6 $\mu$ M for M184V RT and 50 $\mu$ M for K65R RT.                                                                                                                                                                                                                                                                                                                                                                                                                                                                                                                                                                                                                                                                                                                                                                                                                                                                                                                                                                                                                                                                   |
| 50 | P22077              | USP7, USP47 | P22077 is an analog of the recently discovered USP7 inhibitor P5091. P22077 has negligible activity versus DEN1 and SENP2core over the concentration range tested, but inhibits USP7 with an IC <sub>50</sub> of 8 $\mu$ M. The inhibitory activities of P22077 in-vitro against a panel of DUBs, cysteine proteases, and other families of proteolytic enzymes demonstrate that P22077 inhibits USP7 and the closely related DUB USP47. P22077 inhibits a smaller subset of DUBs at a concentration of 15–45 mM in cell lysates. P22077 induces (tumor) cell death with EC <sub>50</sub> values in the low micromolar range. P22077 inhibition exhibited changes in ubiquitylated protein levels that are distinct from the broad specificity inhibitor. P22077 treatment of U2OS cells during release from G1/S arrest induces with hydroxyurea resulted in a dose-dependent loss of claspin protein and a concomitant decrease in phospho Serine 317 Chk1. Furthermore, quantitative MS suggests the E3 ubiquitin ligase components RBX1, DCAF7, DCAF11, and the DNA damage binding protein 1 (DDB1) to be reduced upon cellular treatment with P22077.                                                                                                                                                                                                                                                                                                                                                                                                                                                                                                                                                                                                                                                                                                                                  |
| 51 | Aloxistatin         |             | Aloxistatin can enter the intact platelet and inhibit proteolysis by inhibiting calpain. Aloxistatin blunts Parathyroid hormone (PTH)-induced cell proliferation and inhibits differentiation osteoblasts in-vitro.                                                                                                                                                                                                                                                                                                                                                                                                                                                                                                                                                                                                                                                                                                                                                                                                                                                                                                                                                                                                                                                                                                                                                                                                                                                                                                                                                                                                                                                                                                                                                                                                                                                                         |
| 52 | NSC697923           | UBE2        | NSC697923 selectively inhibits PMA-induced NF- $\kappa$ B activation, and also inhibits I $\kappa$ B $\alpha$ phosphorylation by both RANKL and LPS. NSC697923 impedes the formation of the Ubc13 and ubiquitin thioester conjugate and suppresses constitutive NF- $\kappa$ B activity in ABC-DLBCL cells. In addition, NSC697923 inhibits the proliferation and survival of ABC-DLBCL cells and GCB-DLBCL cells, and also induces apoptosis of primary DLBCL cells. In neuroblastoma (NB) cell lines, NSC697923 shows cytotoxic effect, and inhibits both anchorage-dependent and -independent colony formation.                                                                                                                                                                                                                                                                                                                                                                                                                                                                                                                                                                                                                                                                                                                                                                                                                                                                                                                                                                                                                                                                                                                                                                                                                                                                          |
| 53 | Apixaban            | F10         | Apixaban exhibits a high degree of potency, selectivity, and efficacy on Factor Xa with Ki of 0.08 nM and 0.17 nM for Human Factor Xa and Rabbit Factor Xa, respectively. In-vitro, Apixaban prolongs the clotting times of normal human plasma with the concentrations (EC <sub>2x</sub> ) of 3.6 $\mu$ M, 0.37 $\mu$ M, 7.4 $\mu$ M, and 0.4 $\mu$ M, which are required respectively to double the prothrombin time (PT), modified prothrombin time                                                                                                                                                                                                                                                                                                                                                                                                                                                                                                                                                                                                                                                                                                                                                                                                                                                                                                                                                                                                                                                                                                                                                                                                                                                                                                                                                                                                                                      |

|    |                                      |                     |                                                                                                                                                                                                                                                                                                                                                                                                                                                                                                                                                                                                                                                                                                                                                                                                                                                                                                                                                                                                                                                                                                                                                                                                                                       |
|----|--------------------------------------|---------------------|---------------------------------------------------------------------------------------------------------------------------------------------------------------------------------------------------------------------------------------------------------------------------------------------------------------------------------------------------------------------------------------------------------------------------------------------------------------------------------------------------------------------------------------------------------------------------------------------------------------------------------------------------------------------------------------------------------------------------------------------------------------------------------------------------------------------------------------------------------------------------------------------------------------------------------------------------------------------------------------------------------------------------------------------------------------------------------------------------------------------------------------------------------------------------------------------------------------------------------------|
|    |                                      |                     | (mPT), activated partial thromboplastin time (APTT) and HepTest. Besides, Apixaban shows the highest potency in human and rabbit plasma, but less potency in rat and dog plasma in both the PT and APTT assays.                                                                                                                                                                                                                                                                                                                                                                                                                                                                                                                                                                                                                                                                                                                                                                                                                                                                                                                                                                                                                       |
| 54 | ML347                                | ACVR1, ACVRL1       | ML347 is a selective BMP receptor inhibitor with IC50 of 32 nM for ALK2, >300-fold selectivity over ALK3. Also inhibits ALK1 activity with IC50 of 46 nM.                                                                                                                                                                                                                                                                                                                                                                                                                                                                                                                                                                                                                                                                                                                                                                                                                                                                                                                                                                                                                                                                             |
| 55 | Irinotecan Trihydrate                | HCl<br>TOP1         | Irinotecan is activated to SN-38 by carboxylesterases to become able to interact with its target, topoisomerase I. Irinotecan induces similar amounts of cleavable complexes at its IC50 in LoVo cells and HT-29 cell lines. SN-38 induces a concentration-dependent formation of cleavable complexes, which is not significantly different in LoVo cells and HT-29 cell lines. Cell accumulation of Irinotecan is markedly different, reaching consistently higher levels in HT-29 cells than in LoVo cells. The lactone E-ring of Irinotecan and SN-38 hydrolyses reversibly in aqueous solutions, and the interconversion between the lactone and carboxylate forms is dependent on pH and temperature. Liver is primarily responsible for the activation of Irinotecan to SN-38. At equal concentrations of Irinotecan and SN-38 glucuronide, the rate of beta-glucuronidase-mediated SN-38 production is higher than that formed from Irinotecan in both tumour and normal tissue. Irinotecan is also converted to SN-38 in intestines, plasma and tumor tissues. Irinotecan is significantly more active in SCLC than in NSCLC cell lines, whereas no significant difference between histological types is observed with SN-38. |
| 56 | SSR128129E                           | FGFR1               | SSR128129E is an orally-active and allosteric FGFR1 inhibitor with IC50 of 1.9 µM, while not affecting other related RTKs.                                                                                                                                                                                                                                                                                                                                                                                                                                                                                                                                                                                                                                                                                                                                                                                                                                                                                                                                                                                                                                                                                                            |
| 57 | VX-765                               | CASP1               | VX-765 is a potent and selective inhibitor of caspase-1 with Ki of 0.8 nM.                                                                                                                                                                                                                                                                                                                                                                                                                                                                                                                                                                                                                                                                                                                                                                                                                                                                                                                                                                                                                                                                                                                                                            |
| 58 | Ferostatin-1 (Fer-1)                 | VDAC                | Ferostatin-1 (Fer-1) is a potent and selective inhibitor of ferroptosis with EC50 of 60 nM.                                                                                                                                                                                                                                                                                                                                                                                                                                                                                                                                                                                                                                                                                                                                                                                                                                                                                                                                                                                                                                                                                                                                           |
| 59 | Rotundine                            | DRD1                | Rotundine (L-tetrahydropalmitine, L-THP) is a selective dopamine D1 receptor antagonist with IC50 of 166 nM.                                                                                                                                                                                                                                                                                                                                                                                                                                                                                                                                                                                                                                                                                                                                                                                                                                                                                                                                                                                                                                                                                                                          |
| 60 | MM-102                               | KANSL1              | MM-102 is a high-affinity peptidomimetic MLL1 inhibitor with IC50 of 0.4 µM.                                                                                                                                                                                                                                                                                                                                                                                                                                                                                                                                                                                                                                                                                                                                                                                                                                                                                                                                                                                                                                                                                                                                                          |
| 61 | PF-3845                              | FAAH                | PF-3845 is a potent, selective and irreversible FAAH inhibitor with Ki of 230 nM, showing negligible activity against FAAH2.                                                                                                                                                                                                                                                                                                                                                                                                                                                                                                                                                                                                                                                                                                                                                                                                                                                                                                                                                                                                                                                                                                          |
| 62 | OTX015                               | BRD2, BRD3, BRD4    | OTX015 is a potent BET bromodomain inhibitor with EC50 ranging from 10 to 19 nM for BRD2, BRD3, and BRD4. Phase 1.                                                                                                                                                                                                                                                                                                                                                                                                                                                                                                                                                                                                                                                                                                                                                                                                                                                                                                                                                                                                                                                                                                                    |
| 63 | Ibrutinib (PCI-32765)                | BTK                 | Ibrutinib is a potent and highly selective Btk inhibitor with IC50 of 0.5 nM, modestly potent to Bmx, CSK, FGR, BRK, HCK, less potent to EGFR, Yes, ErbB2, JAK3, etc.                                                                                                                                                                                                                                                                                                                                                                                                                                                                                                                                                                                                                                                                                                                                                                                                                                                                                                                                                                                                                                                                 |
| 64 | 4E1RCat                              | EIF4E               | 4E1RCat is a dual inhibitor of eIF4E:eIF4G and eIF4E:4E-BP1 interaction, and inhibits the binding of eIF4G to eIF4E with IC50 of 3.2 µM.                                                                                                                                                                                                                                                                                                                                                                                                                                                                                                                                                                                                                                                                                                                                                                                                                                                                                                                                                                                                                                                                                              |
| 65 | Tofacitinib (CP-690550, Tasocitinib) | JAK3                | Tofacitinib is a novel inhibitor of JAK3 with IC50 of 1 nM, 20- to 100-fold less potent against JAK2 and JAK1.                                                                                                                                                                                                                                                                                                                                                                                                                                                                                                                                                                                                                                                                                                                                                                                                                                                                                                                                                                                                                                                                                                                        |
| 66 | PHA-793887                           | CDK2, CDK5, CDK7    | PHA-793887 is a novel and potent inhibitor of CDK2, CDK5 and CDK7 with IC50 of 8 nM, 5 nM and 10 nM. It is greater than 6-fold more selective for CDK2, 5, and 7 than CDK1, 4, and 9. Phase 1.                                                                                                                                                                                                                                                                                                                                                                                                                                                                                                                                                                                                                                                                                                                                                                                                                                                                                                                                                                                                                                        |
| 67 | WZ811                                | CXCR4               | WZ811 is a highly potent competitive CXCR4 antagonist with EC50 of 0.3 nM.                                                                                                                                                                                                                                                                                                                                                                                                                                                                                                                                                                                                                                                                                                                                                                                                                                                                                                                                                                                                                                                                                                                                                            |
| 68 | Allopurinol                          | HCRTR1, HCRTR2      | Allopurinol (Zyloprim) is a xanthine oxidase inhibitor with an IC50 of 7.82±0.12 µM.                                                                                                                                                                                                                                                                                                                                                                                                                                                                                                                                                                                                                                                                                                                                                                                                                                                                                                                                                                                                                                                                                                                                                  |
| 69 | HC-030031                            | TRPA1               | HC-030031 is a selective TRPA1 channel blocker that antagonizes AITC- and formalin-evoked calcium influx with IC50 of 6.2 µM and 5.3 µM respectively.                                                                                                                                                                                                                                                                                                                                                                                                                                                                                                                                                                                                                                                                                                                                                                                                                                                                                                                                                                                                                                                                                 |
| 70 | Telmisartan                          | AGTR                | Telmisartan (Micardis) is an angiotensin II receptor antagonist (ARB) used in the management of hypertension.                                                                                                                                                                                                                                                                                                                                                                                                                                                                                                                                                                                                                                                                                                                                                                                                                                                                                                                                                                                                                                                                                                                         |
| 71 | Mozavaptan                           | AVPR1, AVPR2        | Mozavaptan is a novel competitive vasopressin receptor antagonist for both V1 and V2 receptors with IC50 of 1.2 µM and 14 nM, respectively.                                                                                                                                                                                                                                                                                                                                                                                                                                                                                                                                                                                                                                                                                                                                                                                                                                                                                                                                                                                                                                                                                           |
| 72 | Cyproterone Acetate                  | AR                  | Cyproterone acetate is an androgen receptor (AR) antagonist with IC50 of 7.1 nM, as well as a weak progesterone receptor agonist with weak pro-gestational and glucocorticoid activity.                                                                                                                                                                                                                                                                                                                                                                                                                                                                                                                                                                                                                                                                                                                                                                                                                                                                                                                                                                                                                                               |
| 73 | Sodium Aminosalicylate               | 4-NFKB              | Sodium 4-Aminosalicylate is an antibiotic used to treat tuberculosis via NF-κB inhibition and free radical scavenging.                                                                                                                                                                                                                                                                                                                                                                                                                                                                                                                                                                                                                                                                                                                                                                                                                                                                                                                                                                                                                                                                                                                |
| 74 | GSK1292263                           | GPR119              | GSK1292263 is a novel GPR119 agonist, showing potential for the treatment of type 2 diabetes. Phase 2.                                                                                                                                                                                                                                                                                                                                                                                                                                                                                                                                                                                                                                                                                                                                                                                                                                                                                                                                                                                                                                                                                                                                |
| 75 | SGC 0946                             | DOT1L               | SGC 0946 is a highly potent and selective DOT1L methyltransferase inhibitor with IC50 of 0.3 nM, is inactive against a panel of 12 PMTs and DNMT1.                                                                                                                                                                                                                                                                                                                                                                                                                                                                                                                                                                                                                                                                                                                                                                                                                                                                                                                                                                                                                                                                                    |
| 76 | LY2157299                            | TGFBR1              | LY2157299 is a potent TGFβ receptor 1 (TβRI) inhibitor with IC50 of 56 nM. Phase 2.                                                                                                                                                                                                                                                                                                                                                                                                                                                                                                                                                                                                                                                                                                                                                                                                                                                                                                                                                                                                                                                                                                                                                   |
| 77 | IPA-3                                | PAK1                | IPA-3 is a selective non-ATP competitive Pak1 inhibitor with IC50 of 2.5 µM, no inhibition to group II PAKs (PAKs 4-6).                                                                                                                                                                                                                                                                                                                                                                                                                                                                                                                                                                                                                                                                                                                                                                                                                                                                                                                                                                                                                                                                                                               |
| 78 | Esomeprazole Sodium                  | ATP4A               | Esomeprazole sodium (Nexium) is a sodium salt of esomeprazole that is a potent proton pump inhibitor with an IC50 of 0.076 mg/kg.                                                                                                                                                                                                                                                                                                                                                                                                                                                                                                                                                                                                                                                                                                                                                                                                                                                                                                                                                                                                                                                                                                     |
| 79 | DMH1                                 | ACVR1               | DMH1 is a selective BMP receptor inhibitor with IC50 of 107.9 nM for ALK2, exhibiting no inhibition on AMPK, ALK5, KDR (VEGFR-2) or PDGFR.                                                                                                                                                                                                                                                                                                                                                                                                                                                                                                                                                                                                                                                                                                                                                                                                                                                                                                                                                                                                                                                                                            |
| 80 | Ozagrel                              | TBXA2R              | Ozagrel is a potent and selective thromboxane A2 synthetase inhibitor with an IC50 of 4 nM.                                                                                                                                                                                                                                                                                                                                                                                                                                                                                                                                                                                                                                                                                                                                                                                                                                                                                                                                                                                                                                                                                                                                           |
| 81 | AZD4547                              | FGFR1, FGFR2, FGFR3 | AZD4547 is a novel selective FGFR inhibitor targeting FGFR1/2/3 with IC50 of 0.2 nM/2.5 nM/1.8 nM, weaker activity against FGFR4, VEGFR2(KDR), and little activity observed against IGFR, CDK2, and p38. Phase 1/2.                                                                                                                                                                                                                                                                                                                                                                                                                                                                                                                                                                                                                                                                                                                                                                                                                                                                                                                                                                                                                   |
| 82 | GW9508                               | FFAR1, FFAR4        | GW9508 is a potent and selective agonist for FFA1 (GPR40) with pEC50 of 7.32, 100-fold selective against GPR120, stimulates insulin secretion in a glucose-sensitive manner.                                                                                                                                                                                                                                                                                                                                                                                                                                                                                                                                                                                                                                                                                                                                                                                                                                                                                                                                                                                                                                                          |

|     |                                  |                     |                                                                                                                                                                                                                            |
|-----|----------------------------------|---------------------|----------------------------------------------------------------------------------------------------------------------------------------------------------------------------------------------------------------------------|
| 83  | VE-821                           | ATR                 | VE-821 is a potent and selective ATP competitive inhibitor of ATR with Ki/IC50 of 13 nM/26 nM, shows inhibition of H2AX phosphorylation, minimal activity against PIKKs ATM, DNA-PK, mTOR and PI3Ky.                       |
| 84  | NSC 405020                       | MMP14               | NSC 405020 is a noncatalytic inhibitor of MT1-MMP, directly interacts with PEX domain of MT1-MMP, affects PEX homodimerization but not catalytic activity of MT1-MMP.                                                      |
| 85  | GNF-2                            | ABL1                | GNF-2 is a highly selective non-ATP competitive inhibitor of Bcr-Abl, shows no activity to FIt3-ITD, Tel-PDGFR, TPR-MET and Tel-JAK1 transformed tumor cells.                                                              |
| 86  | TPCA-1                           | IKKBK               | TPCA-1 is an inhibitor of IKK-2 with IC50 of 17.9 nM, inhibits NF-κB pathway, exhibits 22-fold selectivity over IKK-1.                                                                                                     |
| 87  | T0901317                         | NR1H3, NR1H2, NR1H4 | T0901317 is a potent and selective agonist for both LXR and FXR, with EC50 of ~50 nM and 5 μM, respectively.                                                                                                               |
| 88  | PD0325901                        | MAP2K1, MAP2K2      | PD0325901 (PD325901) is selective and non ATP-competitive MEK inhibitor with IC50 of 0.33 nM, roughly 500-fold more potent than CI-1040 on phosphorylation of ERK1 and ERK2. Phase 1/2.                                    |
| 89  | PYR-41                           | UBA1                | PYR-41 is the first cell-permeable inhibitor of ubiquitin-activating enzyme E1, with no activity at E2.                                                                                                                    |
| 90  | U0126-EtOH                       | MAP2K1, MAP2K2      | U0126-EtOH is a highly selective inhibitor of MEK1/2 with IC50 of 0.07 μM/0.06 μM, 100-fold higher affinity for ΔN3-S218E/S222D MEK than PD098059.                                                                         |
| 91  | LDN-212854                       | ACVR1, ACVRL1       | LDN-212854 is a potent and selective BMP receptor inhibitor with IC50 of 1.3 nM for ALK2, about 2-, 66-, 1641-, and 7135-fold selectivity over ALK1, ALK3, ALK4, and ALK5, respectively.                                   |
| 92  | Ki16425                          | LPAR1, LPAR2, LPAR3 | Ki16425 is a competitive, potent and reversible antagonist to LPA1, LPA2 and LPA3 with Ki of 0.34 μM, 6.5 μM and 0.93 μM, respectively, shows no activity at LPA4, LPA5, LPA6.                                             |
| 93  | C646                             | EP300               | C646 is an inhibitor for histone acetyltransferase, and inhibits p300 with a Ki of 400 nM. Preferentially selective for p300 versus other acetyltransferases.                                                              |
| 94  | Oxcarbazepine                    | SCN                 | Oxcarbazepine inhibits the binding of [3H]BTX to sodium channels with IC50 of 160 μM and also inhibits the influx of 22Na+ into rat brain synaptosomes with IC50 about 100 μM.                                             |
| 95  | Mdivi-1                          | DRP1, DNM1          | Mdivi-1 is a selective cell-permeable inhibitor of mitochondrial division DRP1 (dynamin-related GTPase) and mitochondrial division Dynamin I (Dnm1) with IC50 of 1-10 μM.                                                  |
| 96  | MRS 2578                         | P2RY6               | MRS2578 is a potent P2Y6 receptor antagonist with IC50 of 37 nM, exhibits insignificant activity at P2Y1, P2Y2, P2Y4, and P2Y11 receptors.                                                                                 |
| 97  | AGI-5198                         | IDH1                | AGI-5198 is the first highly potent and selective inhibitor of IDH1 R132H/R132C mutants with IC50 of 0.07 μM/0.16 μM.                                                                                                      |
| 98  | LY2603618                        | CHEK1               | LY2603618 is a selective Chk1 inhibitor with potential anti-tumor activity.                                                                                                                                                |
| 99  | BTB06584                         | ATP5A1              | BTB06584 is an IF1-dependent, selective inhibitor of the mitochondrial F1 Fo-ATPase.                                                                                                                                       |
| 100 | NPS-2143                         | CASR                | NPS 2143 is a novel potent and selective antagonist of Ca(2+) receptor with IC50 of 43 nM.                                                                                                                                 |
| 101 | Veliparib (ABT-888)              | PARP1, PARP2        | Veliparib (ABT-888) is a potent inhibitor of PARP1 and PARP2 with Ki of 5.2 nM and 2.9 nM, respectively. It is inactive to SIRT2. Phase 1/2.                                                                               |
| 102 | Dalcetrapib (JTT-705, RO4607381) | CETP                | Dalcetrapib (JTT-705) is a rhCETP inhibitor with IC50 of 0.2 μM that increases the plasma HDL cholesterol. Phase 3.                                                                                                        |
| 103 | Vandetanib (ZD6474)              | KDR                 | Vandetanib (ZD6474) is a potent inhibitor of VEGFR2 with IC50 of 40 nM.                                                                                                                                                    |
| 104 | Istradefylline                   | ADORA2A             | Istradefylline is a selective adenosine A2A receptor (A2AR) antagonist with Ki of 2.2 nM.                                                                                                                                  |
| 105 | Iniparib (BSI-201)               | PARP1               | BSI-201 (Iniparib, SAR240550) is a PARP1 inhibitor with demonstrated effectiveness in triple-negative breast cancer (TNBC). Phase 3.                                                                                       |
| 106 | Dabrafenib (GSK2118436)          | BRAF (V600)         | Dabrafenib (GSK2118436) is a mutant BRAFV600 specific inhibitor with IC50 of 0.8 nM, with 4- and 6-fold less potency against B-Raf(wt) and c-Raf, respectively. Phase 3.                                                   |
| 107 | Finasteride                      | SRD5A2              | Finasteride is an inhibitor of steroid Type II 5α-reductase.                                                                                                                                                               |
| 108 | Tyrphostin AG 879                | ERBB2               | Tyrphostin AG 879 potently inhibits HER2/ErbB2 with IC50 of 1 μM, 100- and 500-fold higher selective to ErbB2 than PDGFR and EGFR.                                                                                         |
| 109 | Cilomilast                       | PDE4                | Cilomilast is a potent PDE4 inhibitor with IC50 of about 110 nM, has anti-inflammatory activity and low central nervous system activity.                                                                                   |
| 110 | TAE226 (NVP-TAE226)              | PTK2, PTK2B         | NVP-TAE226 is a potent FAK inhibitor with IC50 of 5.5 nM and modestly potent to Pyk2, ~10- to 100-fold less potent against InsR, IGF-1R, ALK, and c-Met.                                                                   |
| 111 | Ozagrel HCl                      | TBXAS1              | Ozagrel HCl is a selective thromboxane A2 synthetase enzyme inhibitors with IC50 of 11 nM, used as antiasthmatic agent.                                                                                                    |
| 112 | Vildagliptin (LAF-237)           | DPP4                | Vildagliptin (LAF-237) inhibits DPP-4 with IC50 of 2.3 nM.                                                                                                                                                                 |
| 113 | Dynasore                         | DNM1, DNM2          | Dynasore is a cell-permeable, reversible non-competitive dynamin inhibitor of GTPase activity of dynamin 1/2, with IC50 of 15 μM, also inhibits the mitochondrial dynamin Drp1, with no effect against other small GTPase. |
| 114 | Piceatannol                      | SYK                 | Piceatannol, a natural stilbene, is a selective Syk inhibitor and ~10-fold selectivity versus Lyn.                                                                                                                         |
| 115 | Quizartinib (AC220)              | FLT3                | Quizartinib (AC220) is a second-generation FLT3 inhibitor for FIt3(ITD/WT) with IC50 of 1.1 nM/4.2 nM, 10-fold more selective for FIt3 than KIT, PDGFRα, PDGFRβ, RET, and CSF-1R. Phase 1/2.                               |

|     |                        |                              |                                                                                                                                                                                                                 |
|-----|------------------------|------------------------------|-----------------------------------------------------------------------------------------------------------------------------------------------------------------------------------------------------------------|
| 116 | Tenovin-6              | TP53, SIRT2, SIRT1, SIRT3    | Tenovin-6 is a small molecule activator of p53 transcriptional activity.                                                                                                                                        |
| 117 | Enzastaurin (LY317615) | PRKCB, PRKCA, PRKCG, PRKCE   | Enzastaurin (LY317615) is a potent PKC $\beta$ selective inhibitor with IC50 of 6 nM, 6- to 20-fold selectivity against PKC $\alpha$ , PKC $\gamma$ and PKC $\epsilon$ . Phase 3.                               |
| 118 | CGP 57380              | MKNK1                        | CGP 57380 is potent MNK1 inhibitor with IC50 of 2.2 $\mu$ M, exhibiting no inhibitory activity on p38, JNK1, ERK1 and -2, PKC, or c-Src-like kinases.                                                           |
| 119 | Bisoprolol fumarate    | ADRB1                        | Bisoprolol is a selective type $\beta$ 1 adrenergic receptor blocker.                                                                                                                                           |
| 120 | Bosutinib (SKI-606)    | SRC, ABL1                    | Bosutinib (SKI-606) is a novel, dual Src/Abl inhibitor with IC50 of 1.2 nM and 1 nM, respectively.                                                                                                              |
| 121 | S3I-201                | STAT3                        | S3I-201 shows potent inhibition of STAT3 DNA-binding activity with IC50 of 86 $\mu$ M, and low activity towards STAT1 and STAT5.                                                                                |
| 122 | HA14-1                 | BCL2                         | HA14-1 is a non-peptidic ligand of a Bcl-2 surface pocket with IC50 of $\sim$ 9 $\mu$ M.                                                                                                                        |
| 123 | TG100-115              | PIK3CG, PIK3CD               | TG100115 is a PI3K $\gamma/\delta$ inhibitor with IC50 of 83 nM/235 nM, with little effect on PI3K $\alpha/\beta$ . Phase 1/2.                                                                                  |
| 124 | ADL5859 HCl            | OPRK1, OPRM1                 | ADL5859 HCl is a $\delta$ -opioid receptor agonist with Ki of 0.8 nM, selectivity against opioid receptor $\kappa$ , $\mu$ , and weak inhibitory activity at the hERG channel. Phase 2.                         |
| 125 | Voriconazole           | CYP51A1                      | Voriconazole is a new triazole derivative similar to fluconazole and itraconazole that acts by inhibiting fungal cytochrome P-450-dependent, 14- $\alpha$ -sterol demethylase-mediated synthesis of ergosterol. |
| 126 | BIBR 1532              | TERT                         | BIBR 1532 is a potent, selective, non-competitive telomerase inhibitor with IC50 of 100 nM.                                                                                                                     |
| 127 | Thiazovivin            | ROCK1, ROCK2                 | Thiazovivin (Tzv) is a novel ROCK inhibitor with IC50 of 0.5 $\mu$ M, promotes hESC survival after single-cell dissociation.                                                                                    |
| 128 | Anastrozole            | CYP19A1                      | Anastrozole is a third-generation nonsteroidal selective aromatase inhibitor.                                                                                                                                   |
| 129 | SB743921               |                              | SB743921 is a kinesin spindle protein (KSP) inhibitor with Ki of 0.1 nM, almost no affinity to MKLP1, Kin2, Kif1A, Kif15, KHC, Kif4 and CENP-E. Phase 1/2.                                                      |
| 130 | EUK 134                | SOD1                         | EUK 134, a synthetic superoxide dismutase (SOD)/catalase mimetic, exhibits potent antioxidant activities, and inhibits the formation of $\beta$ -amyloid and related amyloid fibril.                            |
| 131 | Bergenin               |                              | Bergenin is trihydroxybenzoic acid glycoside and the C-glycoside of 4-O-methyl gallic acid.                                                                                                                     |
| 132 | SN-38                  | TOP1                         | SN-38 is an active metabolite of CPT-11, inhibits DNA topoisomerase I, DNA synthesis and causes frequent DNA single-strand breaks.                                                                              |
| 133 | CP-91149               | PYGL, PYGM, PYGB             | CP-91149 is a selective glycogen phosphorylase (GP) inhibitor with IC50 of 0.13 $\mu$ M in the presence of glucose, 5- to 10-fold less potent in the absence of glucose.                                        |
| 134 | Wnt-C59 (C59)          | WNT3A                        | Wnt-C59 (C59) is a PORCN inhibitor for Wnt3A-mediated activation of a multimerized TCF-binding site driving luciferase with IC50 of 74 $\mu$ M.                                                                 |
| 135 | NU7026                 | PRKDC                        | NU7026 is a potent DNA-PK inhibitor with IC50 of 0.23 $\mu$ M, 60-fold selective for DNA-PK than PI3K and inactive against both ATM and ATR.                                                                    |
| 136 | BAM7                   | BAX                          | BAM 7 is a direct and selective activator of proapoptotic Bax with EC50 of 3.3 $\mu$ M.                                                                                                                         |
| 137 | ZM 306416              | FLT1                         | ZM 306416 is a VEGFR (Flt and KDR) inhibitor for VEGFR1 with IC50 of 0.33 $\mu$ M, but also found to inhibit EGFR with IC50 of $<$ 10 nM.                                                                       |
| 138 | (+)-JQ1                | BRD4                         | (+)-JQ1 is a BET bromodomain inhibitor, with IC50 of 77 nM/33 nM for BRD4(1/2), binding to all bromodomains of the BET family, but not to bromodomains outside the BET family.                                  |
| 139 | GW9662                 | PPARG                        | GW9662 is a selective PPAR antagonist for PPAR $\gamma$ with IC50 of 3.3 nM, with at least 100 to 1000-fold functional selectivity in cells with PPAR $\gamma$ versus PPAR $\alpha$ and PPAR $\delta$ .         |
| 140 | KPT-185                | XPO1                         | KPT-185 is a selective CRM1 inhibitor.                                                                                                                                                                          |
| 141 | Pifithrin- $\mu$       | TP53, HSPBP1                 | Pifithrin- $\mu$ is a specific p53 inhibitor by reducing its affinity to Bcl-xL and Bcl-2, and also inhibits HSP70 function and autophagy.                                                                      |
| 142 | Batimastat (BB-94)     | MMP1, MMP2, MMP3, MMP7, MMP9 | Batimastat (BB-94) is a potent, broad spectrum matrix metalloprotease (MMP) inhibitor for MMP-1, MMP-2, MMP-9, MMP-7 and MMP-3 with IC50 of 3 nM, 4 nM, 4 nM, 6 nM and 20 nM, respectively.                     |
| 143 | Sertraline HCl         |                              | Sertraline HCl is a 5-HT antagonist with Ki of 13 nM.                                                                                                                                                           |
| 144 | OG-L002                | KDM1A                        | OG-L002 is a potent and specific LSD1 inhibitor with IC50 of 20 nM, exhibiting 36- and 69-fold selectivity over MAO-B and MAO-A, respectively.                                                                  |
| 145 | MK-1775                | WEE1                         | MK-1775 is a potent and selective Wee1 inhibitor with IC50 of 5.2 nM; hinders G2 DNA damage checkpoint. Phase 2.                                                                                                |
| 146 | Costunolide            | TERT                         | Costunolide, a natural sesquiterpene compound with multiple biological activities; inhibits FPTase with IC50 of 20 $\mu$ M, also inhibits telomerase with IC50 of 65-90 $\mu$ M.                                |
| 147 | AT101                  | BCL2, BCL2L1, MCL1           | AT101, the R-(-) enantiomer of Gossypol acetic acid, binds with Bcl-2, Bcl-xL and Mcl-1 with Ki of 0.32 $\mu$ M, 0.48 $\mu$ M and 0.18 $\mu$ M; does not inhibit BIR3 domain and BID. Phase 1/2.                |
| 148 | GSK690693              | AKT1, AKT2, AKT3             | GSK690693 is a pan-Akt inhibitor targeting Akt1/2/3 with IC50 of 2 nM/13 nM/9 nM, also sensitive to the AGC kinase family: PKA, PrkX and PKC isozymes. Phase 1.                                                 |
| 149 | Tropicamide            | CHRM4                        | Tropicamide is an anticholinergic and a muscarinic receptor subtype M4-preferring antagonist with IC50 of 8.0 nM.                                                                                               |
| 150 | BMS-707035             |                              | BMS-707035 is a specific HIV-1 integrase (IN) inhibitor with IC50 of 15 nM. Phase 2.                                                                                                                            |
| 151 | Raltegravir (MK-0518)  |                              | Raltegravir (MK-0518) is a potent integrase (IN) inhibitor for WT and S217Q PFV IN with IC50 of 90 nM and 40 nM, respectively.                                                                                  |
| 152 | EX 527 (Selisistat)    | SIRT1                        | EX 527 is a potent and selective SIRT1 inhibitor with IC50 of 38 nM, exhibits $>$ 200-fold selectivity against SIRT2 and SIRT3.                                                                                 |

|     |                              |                       |                                                                                                                                                                                                             |
|-----|------------------------------|-----------------------|-------------------------------------------------------------------------------------------------------------------------------------------------------------------------------------------------------------|
| 153 | CCT128930                    | AKT2                  | CCT128930 is a potent, ATP-competitive and selective inhibitor of Akt2 with IC50 of 6 nM, 28-fold greater selectivity for Akt2 than the closely related PKA kinase.                                         |
| 154 | Pomalidomide                 | TNF                   | Pomalidomide inhibits LPS-induced TNF- $\alpha$ release with IC50 of 13 nM.                                                                                                                                 |
| 155 | AS-252424                    | PIK3CG                | AS-252424 is a novel, potent PI3K $\gamma$ inhibitor with IC50 of 30 nM with 30-fold selectivity for PI3K $\gamma$ than PI3K $\alpha$ , and low inhibitory activity towards PI3K $\delta/\beta$ .           |
| 156 | Tie2 kinase inhibitor        | TEK                   | Tie2 kinase inhibitor is an optimized compound of SB-203580, selective to Tie2 with IC50 of 0.25 $\mu$ M, 200-fold more potent than p38.                                                                    |
| 157 | Ouabain                      | ATP1B                 | Ouabain is a selective Na <sup>+</sup> /K <sup>+</sup> , -ATPase inhibitor, binds to $\alpha$ 2 / $\alpha$ 3 subunit with Ki of 41 nM/15 nM.                                                                |
| 158 | Ranitidine                   | HRH2                  | Ranitidine is a histamine H2-receptor antagonist with IC50 of 3.3 $\pm$ 1.4 $\mu$ M.                                                                                                                        |
| 159 | SKI II                       | S1PR                  | SKI II is a highly selective and non ATP-competitive S1P receptor inhibitor with IC50 of 0.5 $\mu$ M, while exhibits no inhibitory on other kinases including PI3K, PKC $\alpha$ and ERK2.                  |
| 160 | Fluvastatin Sodium           | HMGCR                 | Fluvastatin Sodium inhibits HMG-CoA reductase activity with IC50 of 8 nM.                                                                                                                                   |
| 161 | Propranolol HCl              | ADRB1                 | Propranolol HCl is a competitive non-selective beta-adrenergic receptors inhibitor with IC50 of 12 nM.                                                                                                      |
| 162 | Erastin                      | VDAC                  | Erastin is a ferroptosis activator by acting on mitochondrial VDAC, exhibiting selectivity for tumor cells bearing oncogenic RAS.                                                                           |
| 163 | Ifenprodil Tartrate          | GRIN                  | Ifenprodil is an atypical noncompetitive antagonist at the NMDA receptor, it interacts with high affinity at a homogeneous population of NMDA receptors in neonatal rat forebrain with IC50 of 0.3 $\mu$ M. |
| 164 | KPT-276                      | XPO1                  | KPT-276 is an orally bioavailable selective CRM1 inhibitor.                                                                                                                                                 |
| 165 | AZD2461                      | PARP                  | AZD2461 is a novel PARP inhibitor with low affinity for Pgp than Olaparib. Phase 1.                                                                                                                         |
| 166 | KPT-330                      | XPO1                  | KPT-330 is an orally bioavailable selective CRM1 inhibitor.                                                                                                                                                 |
| 167 | AGI-6780                     | IDH2                  | AGI-6780 is a potent and selective inhibitor of IDH2 R140Q mutant with IC50 of 23 nM.                                                                                                                       |
| 168 | SGI-1027                     | DNMT1, DNMT3A, DNMT3B | SGI-1027 is a DNMT inhibitor with IC50 of 6, 8, 7.5 $\mu$ M for DNMT1, DNMT3A, and DNMT3B                                                                                                                   |
| 169 | Atglistatin                  | PNPLA2                | Atglistatin is a highly potent, and selective inhibitor of adipose triglyceride lipase (ATGL) with IC50 of 0.7 $\mu$ M, high selectivity over other key metabolic lipases.                                  |
| 170 | Suvorexant (MK-4305)         | HCRTR1, HCRTR2        | Suvorexant (MK-4305) is a potent dual OX receptor antagonist with Ki of 0.55 nM and 0.35 nM for OX1 receptor and OX2 receptor, respectively. Phase 3.                                                       |
| 171 | SRT1720                      | SIRT1                 | SRT1720 is a selective SIRT1 activator with EC50 of 0.16 $\mu$ M, but is >230-fold less potent for SIRT2 and SIRT3.                                                                                         |
| 172 | 4EGI-1                       | EIF4E                 | 4EGI-1 is a competitive eIF4E/eIF4G interaction inhibitor by binding to eIF4E with KD of 25 $\mu$ M.                                                                                                        |
| 173 | Exemestane                   | CYP19A1               | Exemestane is an aromatase inhibitor, inhibits human placental and rat ovarian aromatase with IC50 of 30 nM and 40 nM, respectively.                                                                        |
| 174 | NSC 23766                    | RAC                   | NSC 23766 is an inhibitor of Rac GTPase targeting Rac activation by guanine nucleotide exchange factors (GEFs) with IC50 of ~50 $\mu$ M; does not inhibit the closely related targets, Cdc42 or RhoA.       |
| 175 | 2-Methoxyestradiol (2-MeOE2) | HIF1A                 | 2-Methoxyestradiol depolymerizes microtubules and blocks HIF-1 $\alpha$ nuclear accumulation and HIF-transcriptional activity. Phase 2.                                                                     |
| 176 | Palbociclib (PD-0332991) HCl | CDK4, CDK6            | PD0332991 is a highly selective inhibitor of CDK4/6 with IC50 of 11 nM/16 nM. It shows no activity against CDK1/2/5, EGFR, FGFR, PDGFR, InsR, etc. Phase 2/3.                                               |
| 177 | EHop-016                     | RAC1, RAC3            | EHop-016 is a specific Rac GTPase inhibitor with IC50 of 1.1 $\mu$ M for Rac1, equally potent inhibition for Rac3.                                                                                          |
| 178 | PF-573228                    | PTK2                  | PF-573228 is an ATP-competitive inhibitor of FAK with IC50 of 4 nM, ~50- to 250-fold selective for FAK than Pyk2, CDK1/7 and GSK-3 $\beta$ .                                                                |
| 179 | ABT-199 (GDC-0199)           | BCL2                  | ABT-199 (GDC-0199) is a Bcl-2-selective inhibitor with Ki of <0.01 nM, >4800-fold more selective versus Bcl-xL and Bcl-w, and no activity to Mcl-1. Phase 2.                                                |
| 180 | Memantine HCl                | CYP2B6                | Memantine hydrochloride (Namenda) is a CYP2B6 and CYP2D6 inhibitor for recombinant CYP2B6 and CYP2D6 with Ki of 0.51 nM and 94.9 $\mu$ M, respectively.                                                     |
| 181 | PTC-209                      | BMI1                  | PTC-209 is a potent and selective BMI-1 inhibitor with IC50 of 0.5 $\mu$ M, and results in irreversible reduction of cancer-initiating cells (CICs).                                                        |
| 182 | Trimebutine                  | OPRK1, OPRM1, OPRD1   | Trimebutine is an agonist of peripheral mu, kappa and delta opiate receptors, used as spasmolytic agent for treatment of both acute and chronic abdominal pain.                                             |
| 183 | CK-636                       | ARPC2, ARPC3          | CK-636 is an Arp2/3 complex inhibitor with IC50 of 4 $\mu$ M, 24 $\mu$ M and 32 $\mu$ M for inhibition of actin polymerization induced by human, fission yeast and bovine Arp2/3 complex, respectively.     |
| 184 | SGI-1776 free base           | PIM1, FLT3, GSG2      | SGI-1776 is a novel ATP competitive inhibitor of Pim1 with IC50 of 7 nM, 50- and 10-fold selective versus Pim2 and Pim3, also potent to Flt3 and haspin. Phase 1.                                           |
| 185 | AZD7545                      | PDK1, PDK2            | AZD7545 is a potent PDHK inhibitor with IC50 of 36.8 nM and 6.4 nM for PDHK1 and PDHK2, respectively.                                                                                                       |
| 186 | URB597                       | FAAH                  | URB597 is a potent, orally bioavailable FAAH inhibitor with IC50 of 4.6 nM, with no activity on other cannabinoid-related targets.                                                                          |
| 187 | GW0742                       | PPARD                 | GW0742 is a potent and highly selective PPAR $\beta/\delta$ agonist, with IC50 of 1 nM, with 1000-fold selectivity over hPPAR $\alpha$ and hPPAR $\gamma$ .                                                 |
| 188 | TAK-875                      | FFAR1                 | TAK-875 is a selective GPR40 agonist with EC50 of 14 nM, 400-fold more potent than oleic acid.                                                                                                              |
| 189 | Pacritinib (SB1518)          | JAK2, FLT3            | Pacritinib (SB1518) is a potent and selective inhibitor of Janus Kinase 2 (JAK2) and Fms-Like Tyrosine Kinase-3 (FLT3) with IC50s of 23 and 22 nM, respectively.                                            |

|     |                            |                              |                                                                                                                                                                                                                                                                            |
|-----|----------------------------|------------------------------|----------------------------------------------------------------------------------------------------------------------------------------------------------------------------------------------------------------------------------------------------------------------------|
| 190 | KX2-391                    | SRC                          | KX2-391 (KX01), the first clinical Src inhibitor (peptidomimetic class) that targets the peptide substrate site of Src, with GI50 of 9-60 nM in cancer cell lines. Phase 1/2.                                                                                              |
| 191 | PluriSIn #1 (NSC 14613)    | SCD                          | PluriSIn #1 is an inhibitor of the stearyl-coA desaturase 1 (SCD1), which is able to selectively eliminate hPSCs.                                                                                                                                                          |
| 192 | Crenolanib (CP-868596)     | PDGFRA, PDGFRB, FLT3 (D842V) | Crenolanib (CP-868596) is a potent and selective inhibitor of PDGFRA/β with Kd of 2.1 nM/3.2 nM, also potently inhibits FLT3, sensitive to D842V mutation not V561D mutation, >100-fold more selective for PDGFR than c-Kit, VEGFR-2, TIE-2, FGFR-2, EGFR, erbB2, and Src. |
| 193 | Enzalutamide (MDV3100)     | AR                           | Enzalutamide (MDV3100) is an androgen-receptor (AR) antagonist with IC50 of 36 nM.                                                                                                                                                                                         |
| 194 | PFI-1 (PF-6405761)         | BRD4                         | PFI-1 is a selective BET (bromodomain-containing protein) inhibitor for BRD4 with IC50 of 0.22 μM.                                                                                                                                                                         |
| 195 | Dapagliflozin              | SLC5A2                       | Dapagliflozin is a potent and selective hSGLT2 inhibitor with EC50 of 1.1 nM, exhibiting 1200-fold selectivity over hSGLT1. Phase 3.                                                                                                                                       |
| 196 | Maraviroc                  | CCR5                         | Maraviroc is a CCR5 antagonist for MIP-1α, MIP-1β and RANTES with IC50 of 3.3 nM, 7.2 nM and 5.2 nM, respectively.                                                                                                                                                         |
| 197 | Nebivolol                  | ADRB1                        | Nebivolol selectively inhibits β1-adrenoceptor with IC50 of 0.8 nM.                                                                                                                                                                                                        |
| 198 | I-BET151 (GSK1210151A)     | BRD2, BRD3, BRD4             | I-BET151 (GSK1210151A) is a novel selective BET inhibitor for BRD2, BRD3 and BRD4 with IC50 of 0.5 μM, 0.25 μM, and 0.79 μM, respectively.                                                                                                                                 |
| 199 | VX-809 (Lumacaftor)        | CFTR                         | VX-809 acts to correct CFTR mutations common in cystic fibrosis by increasing mutant CFTR (F508del-CFTR) maturation, EC50 of 0.1 μM. Phase 3.                                                                                                                              |
| 200 | Apoptosis Activator 2      | CASP3                        | Apoptosis Activator 2 strongly induces caspase-3 activation, PARP cleavage, and DNA fragmentation which leads to the destruction of cells (Apaf-1 dependent) with IC50 of ~4 μM, inactive to HMEC, PREC, or MCF-10A cells.                                                 |
| 201 | Naproxen                   | PTGS1, PTGS2                 | Naproxen is a COX inhibitor for COX-1 and COX-2 with IC50 of 8.7 μM and 5.2 μM, respectively.                                                                                                                                                                              |
| 202 | Bosentan Hydrate           | EDNRA, EDNRB                 | Bosentan is an endothelin (ET) receptors antagonist for ET-A and ET-B with Ki of 4.7 nM and 95 nM, respectively.                                                                                                                                                           |
| 203 | Acadesine                  | PRKAA1                       | Acadesine results in accumulation of ZMP, which mimics the stimulating effect of AMP on AMPK and AMPK kinase. Phase 3.                                                                                                                                                     |
| 204 | E-64                       | CTSK                         | E-64 is an irreversible and selective cysteine protease inhibitor with IC50 of 9 nM for papain.                                                                                                                                                                            |
| 205 | Captopril                  | ACE                          | Captopril is an angiotensin-converting enzyme (ACE) inhibitor with IC50 of 6 nM.                                                                                                                                                                                           |
| 206 | Selumetinib (AZD6244)      | MAP2K1, MAPK3, MAPK1         | Selumetinib (AZD6244) is a potent, highly selective MEK1 inhibitor with IC50 of 14 nM, also inhibits ERK1/2 phosphorylation with IC50 of 10 nM, no inhibition to p38α, MKK6, EGFR, ErbB2, ERK2, B-Raf, etc. Phase 1/2.                                                     |
| 207 | Tolvaptan                  | AVPR2                        | Tolvaptan is a selective, competitive arginine vasopressin receptor 2 antagonist with an IC50 of 1.28 μM for the inhibition of AVP-induced platelet aggregation.                                                                                                           |
| 208 | PD184352 (CI-1040)         | MAP2K1, MAP2K2               | CI-1040 (PD 184352) is an ATP non-competitive MEK1/2 inhibitor with IC50 of 17 nM, 100-fold more selective for MEK1/2 than MEK5. Phase 2.                                                                                                                                  |
| 209 | OSI-906 (Linsitinib)       | IGF1R, INSR                  | OSI-906 (Linsitinib) is a selective inhibitor of IGF-1R with IC50 of 35 nM; modestly potent to InsR with IC50 of 75 nM, and no activity towards Abl, ALK, BTK, EGFR, FGFR1/2, PKA etc. Phase 3.                                                                            |
| 210 | Canagliflozin              | SLC5A2                       | Canagliflozin is a highly potent and selective SGLT2 inhibitor for hSGLT2 with IC50 of 2.2 nM, exhibits 413-fold selectivity over hSGLT1.                                                                                                                                  |
| 211 | CP-673451                  | PDGFRA, PDGFRB               | CP 673451 is a selective inhibitor of PDGFRA/β with IC50 of 10 nM/1 nM, exhibits >450-fold selectivity over other angiogenic receptors, has antiangiogenic and antitumor activity.                                                                                         |
| 212 | Sirtinol                   | SIRT1, SIRT2                 | Sirtinol is a specific SIRT1 and SIRT2 inhibitor with IC50 of 131 μM and 38 μM, respectively.                                                                                                                                                                              |
| 213 | Methotrexate               | DHFR                         | Methotrexate is an antimetabolite and antifolate drug, which acts by inhibiting the metabolism of folic acid.                                                                                                                                                              |
| 214 | SAR131675                  | FLT4                         | SAR131675 is a VEGFR3 inhibitor with IC50/Ki of 23 nM/12 nM, about 50- and 10-fold more selective for VEGFR3 than VEGFR1/2, little activity against Akt1, CDKs, PLK1, EGFR, IGF-1R, c-Met, Flt2 etc.                                                                       |
| 215 | Pralatrexate               | DHFR                         | Pralatrexate (Folotylin) is an antifolate, and structurally a folate analog. Its IC50 is < 300 nM in some cell lines.                                                                                                                                                      |
| 216 | BML-190                    | CNR2                         | BML-190 is a selective cannabinoid CB2 receptor inverse agonist with Ki of 435 nM, with 50-fold selectivity over CB1 receptor.                                                                                                                                             |
| 217 | TWS119                     | GSK3B                        | TWS119 is a GSK-3β inhibitor with IC50 of 30 nM; capable of inducing neuronal differentiation and may be useful to stem cell biology.                                                                                                                                      |
| 218 | IKK-16 (IKK Inhibitor VII) | IKBKB, CHUK                  | IKK 16 is a selective IκB kinase (IKK) inhibitor for IKK-2, IKK complex and IKK-1 with IC50 of 40 nM, 70 nM and 200 nM, respectively.                                                                                                                                      |
| 219 | Enalaprilat Dihydrate      | ACE                          | Enalaprilat is an angiotensin-converting enzyme (ACE) inhibitor with IC50 of 1.94 nM.                                                                                                                                                                                      |
| 220 | Triamterene                | SCN                          | Triamterene blocks epithelial Na+ channel (ENaC) in a voltage-dependent manner with IC50 of 4.5 μM.                                                                                                                                                                        |
| 221 | Clemastine Fumarate        | HRH1                         | Clemastine Fumarate (Clemastine) is a selective histamine H1 receptor antagonist with IC50 of 3 nM.                                                                                                                                                                        |
| 222 | Fingolimod (FTY720) HCl    | S1PR                         | Fingolimod (FTY720) is a S1P antagonist with IC50 of 0.033 nM.                                                                                                                                                                                                             |
| 223 | Amlodipine                 | CACNA1C                      | Amlodipine (Norvasc) is a long-acting calcium channel blocker with an IC50 of 1.9 nM.                                                                                                                                                                                      |
| 224 | PP2                        | SRC                          | PP2 is Src family kinase inhibitor, potently inhibits Lck/Fyn with IC50 of 4 nM/5 nM, ~100-fold less potent to EGFR, inactive for ZAP-70, JAK2 and PKA.                                                                                                                    |

|     |                                    |                                |                                                                                                                                                                                                 |
|-----|------------------------------------|--------------------------------|-------------------------------------------------------------------------------------------------------------------------------------------------------------------------------------------------|
| 225 | CHIR-124                           | CHEK1                          | CHIR-124 is a novel and potent Chk1 inhibitor with IC50 of 0.3 nM. It shows 2,000-fold selectivity against Chk2, 500- to 5,000-fold less activity against CDK2/4 and Cdc2.                      |
| 226 | Temsirolimus (CCI-779, NSC 683864) | MTOR                           | Temsirolimus (CCI-779) is a specific mTOR inhibitor with IC50 of 1.76 µM.                                                                                                                       |
| 227 | YO-01027                           | APP, APPL1, NOTCH              | YO-01027 (Dibenzazepine, DBZ) is a dipeptidic γ-secretase inhibitor with IC50 of 2.6 nM and 2.9 nM for APPL and Notch cleavage, respectively.                                                   |
| 228 | Trichostatin A (TSA)               | ALL HDACS (Except HDAC8)       | Trichostatin A (TSA) is an HDAC inhibitor with IC50 of ~1.8 nM – HDAC8 is the only known member of the HDAC-family that is not affected by TSA. Phase 3.                                        |
| 229 | PAC-1                              | CASP3                          | PAC-1 is a potent procaspase-3 activator with EC50 of 0.22 µM and the first small molecule known to directly activate procaspase-3 to caspase-3.                                                |
| 230 | PHA-665752                         | MET                            | PHA-665752 is a potent, selective and ATP-competitive c-Met inhibitor with IC50 of 9 nM, >50-fold selectivity for c-Met than RTKs or STKs.                                                      |
| 231 | VE-822                             | ATR                            | VE-822 is an ATR inhibitor with IC50 of 19 nM.                                                                                                                                                  |
| 232 | SB203580                           | MAPK11, MAPK12, MAPK13, MAPK14 | SB203580 is a p38 MAPK inhibitor with IC50 of 0.3-0.5 µM, 10-fold less sensitive to SAPK3(106T) and SAPK4(106T) and blocks PKB phosphorylation with IC50 of 3-5 µM.                             |
| 233 | EPZ-6438                           | EZH2                           | EPZ-6438 is a potent, and selective EZH2 inhibitor with Ki and IC50 of 2.5 nM and 11 nM, exhibiting a 35-fold selectivity versus EZH1 and >4,500-fold selectivity relative to 14 other HMTs.    |
| 234 | KU-55933 (ATM Kinase Inhibitor)    | ATM                            | KU-55933 is a potent and specific ATM inhibitor with IC50/Ki of 12.9 nM/2.2 nM, and is highly selective for ATM as compared to DNA-PK, PI3K/PI4K, ATR and mTOR.                                 |
| 235 | CGK 733                            | ATM, ATR                       | CGK 733 is a potent and selective inhibitor of ATM/ATR with IC50 of ~200 nM.                                                                                                                    |
| 236 | WZ4002                             | EGFR                           | WZ4002 is a novel, mutant-selective EGFR inhibitor for EGFR(L858R)/(T790M) with IC50 of 2 nM/8 nM; does not inhibit ERBB2 phosphorylation (T7981).                                              |
| 237 | WZ4003                             | NUAK1, NUAK2                   | WZ4003 is a highly specific NUAK kinase inhibitor with IC50 of 20 nM and 100 nM for NUAK1 and NUAK2, respectively, without significant inhibition on 139 other kinases.                         |
| 238 | TAK-700 (Orteronel)                | CYP17A1                        | TAK-700 (Orteronel) is a potent and highly selective human 17,20-lyase inhibitor with IC50 of 38 nM, exhibits >1000-fold selectivity over other CYPs (e.g. 11-hydroxylase and CYP3A4). Phase 3. |
| 239 | Loxistatin Acid (E-64C)            |                                | Loxistatin Acid (E-64C), a derivative of E-64, is an irreversible and membrane-permeant cysteine protease inhibitor.                                                                            |
| 240 | Zibotentan (ZD4054)                | EDNRA                          | Zibotentan (ZD4054) is a specific Endothelin (ET)A antagonist with IC50 of 21 nM, exhibiting no activity at ETB. Phase 3.                                                                       |
| 241 | Pyrimethamine                      | DHFR                           | Pyrimethamine is a dihydrofolate reductase(DHFR) inhibitor with an IC50 of 15.4 nM.                                                                                                             |
| 242 | RKI-1447                           | ROCK1, ROCK2                   | RKI-1447 is a potent inhibitor of ROCK1 and ROCK2, with IC50 of 14.5 nM and 6.2 nM, respectively, has anti-invasive and antitumor activities.                                                   |
| 243 | UNC2250                            | MERTK                          | UNC2250 is a potent and selective Mer inhibitor with IC50 of 1.7 nM, about 160- and 60-fold selectivity over the closely related kinases Axl/Tyro3.                                             |
| 244 | SMI-4a                             | PIM1                           | SMI-4a is a potent inhibitor of Pim1 with IC50 of 17 nM, modest potent to Pim-2, does not significantly inhibit other serine/threonine- or tyrosine-kinases.                                    |
| 245 | SB415286                           | GSK3A                          | SB415286 is a potent GSK3α inhibitor with IC50/Ki of 78 nM/31 nM with equally effective inhibition of GSK-3β.                                                                                   |
| 246 | PRT062607 (P505-15, BIIB057) HCl   | SYK                            | PRT062607 (P505-15) HCl is a novel, highly selective Syk inhibitor with IC50 of 1 nM, >80-fold selective for Syk than Fgr, Lyn, FAK, Pyk2 and Zap70.                                            |
| 247 | Torcetrapib                        | CETP                           | Torcetrapib is a CETP inhibitor with IC50 of 37 nM, elevates HDL-C and reduces nonHDL-C in plasma. Phase 3.                                                                                     |
| 248 | MK-2206 2HCl                       | AKT1, AKT2, AKT3               | MK-2206 2HCl is a highly selective inhibitor of Akt1/2/3 with IC50 of 8 nM/12 nM/65 nM, respectively; no inhibitory activities against 250 other protein kinases observed. Phase 2.             |
| 249 | ML130 (Nodinitib-1)                | NOD1                           | ML130 is a potent and selective inhibitor of NOD1 with IC50 of 0.56 µM, inhibits NF-κB activation, exhibits 36-fold selectivity over NOD2.                                                      |
| 250 | PF-04217903                        | MET                            | PF-04217903 is a selective ATP-competitive c-Met inhibitor with IC50 of 4.8 nM, susceptible to oncogenic mutations (no activity to Y1230C mutant). Phase 1.                                     |
| 251 | GW441756                           | NTRK1                          | GW441756 is a potent, selective inhibitor of TrkA with IC50 of 2 nM, with very little activity to c-Raf1 and CDK2.                                                                              |
| 252 | Varespladib (LY315920)             | PLA2G2A                        | LY315920 (Varespladib) is a potent and selective human non-pancreatic secretory phospholipase A2 (hnsPLA) inhibitor with IC50 of 7 nM. Phase 3.                                                 |
| 253 | ML161                              | PARP1                          | ML-161 is an allosteric inhibitor of PAR1 with IC50 of 0.26 µM.                                                                                                                                 |
| 254 | MK-2866 (GTx-024)                  | AR                             | MK-2866 (GTx-024) is a selective androgen receptor modulator (SARM) with Ki of 3.8 nM, and is tissue-selective for anabolic organs. Phase 3.                                                    |
| 255 | Ticagrelor                         | P2RY12                         | Ticagrelor is the first reversibly binding oral P2Y12 receptor antagonist, also inhibits CYP2C9 and 4-hydroxylation with IC50 of 10.5 µM and 8.2 µM respectively.                               |
| 256 | Letrozole                          | CYP19A1                        | Letrozole is a third generation inhibitor of aromatase with IC50 of 0.07-20 nM.                                                                                                                 |
| 257 | GW2580                             | CSF1R                          | GW2580 is a selective CSF-1R inhibitor for c-FMS with IC50 of 30 nM, 150- to 500-fold selective compared to b-Raf, CDK4, c-KIT, c-SRC, EGFR, ERBB2/4, ERK2, FLT-3, GSK3, ITK, JAK2 etc.         |
| 258 | Zosuquidar (LY335979) 3HCl         | ABCB1                          | Zosuquidar (LY335979) is a potent modulator of P-glycoprotein-mediated multi-drug resistance with Ki of 60 nM. Phase 3.                                                                         |
| 259 | KU-60019                           | ATM                            | KU-60019 is an improved analogue of KU-55933, with IC50 of 6.3 nM for ATM, 270- and 1600-fold more selective for ATM than DNA-PK and ATR, and is a highly effective radiosensitizer.            |

|     |                                      |                                         |                                                                                                                                                                                                                                                                            |
|-----|--------------------------------------|-----------------------------------------|----------------------------------------------------------------------------------------------------------------------------------------------------------------------------------------------------------------------------------------------------------------------------|
| 260 | LY2228820                            | MAPK11,<br>MAPK12,<br>MAPK13,<br>MAPK14 | LY2228820 is a novel and potent inhibitor of p38 MAPK with IC50 of 7 nM, does not alter p38 MAPK activation. Phase 1/2.                                                                                                                                                    |
| 261 | MLN2238                              | PSMC1                                   | MLN2238 inhibits the chymotrypsin-like proteolytic ( $\beta$ 5) site of the 20S proteasome with IC50 and Ki of 3.4 nM and 0.93 nM, respectively, also inhibits the caspase-like ( $\beta$ 1) and trypsin-like ( $\beta$ 2) proteolytic sites, with IC50 of 31 and 3500 nM. |
| 262 | Org 27569                            | CNR1                                    | Org 27569 is an allosteric modulator of cannabinoid CB1 receptor, induces a CB1 receptor state that is characterized by enhanced agonist affinity and decreased inverse agonist affinity.                                                                                  |
| 263 | Oxymetazoline HCl                    | ADRA1A                                  | Oxymetazoline hydrochloride is an $\alpha$ 1 and $\alpha$ 2 adrenergic receptor agonist.                                                                                                                                                                                   |
| 264 | DMXAA (Vadimezan)                    | NQ01                                    | DMXAA (Vadimezan) is a vascular disrupting agents (VDA) and competitive inhibitor of DT-diaphorase with Ki of 20 $\mu$ M and IC50 of 62.5 $\mu$ M, respectively. Phase 3.                                                                                                  |
| 265 | Anacetrapib (MK-0859)                | CETP                                    | Anacetrapib (MK0859) is a potent, selective, reversible rhCETP and mutant CETP(C13S) inhibitor with IC50 of 7.9 nM and 11.8 nM, increases HDL-C and decreases LDL-C, does not increase aldosterone or blood pressure. Phase 3.                                             |
| 266 | AM1241                               | CNR2                                    | AM-1241 is a selective cannabinoid CB2 receptor agonist with Ki of 3.4 nM, exhibits 82-fold selectivity over CB1 receptor.                                                                                                                                                 |
| 267 | Embelin                              | XIAP                                    | Embelin, a quinone isolated from the Japanese Ardisia herb, is an inhibitor of X-linked inhibitor of apoptosis (XIAP) with IC50 of 4.1 $\mu$ M.                                                                                                                            |
| 268 | Toremifene Citrate                   | ESR                                     | Toremifene Citrate is an oral selective estrogen receptor modulator (SERM) which helps oppose the actions of estrogen in the body.                                                                                                                                         |
| 269 | GSK2656157                           | EIF2AK3                                 | GSK2656157 is an ATP-competitive and highly selective inhibitor of PERK with IC50 of 0.9 nM, 500-fold greater against a panel of 300 kinases.                                                                                                                              |
| 270 | Felodipine                           | CACNA1C                                 | Felodipine is a selective L-type Ca <sup>2+</sup> channel blocker with IC50 of 0.15 nM.                                                                                                                                                                                    |
| 271 | (+)-Bicuculline                      | GABR,<br>KCNA1                          | (+)-Bicuculline is a competitive antagonist of GABAA receptors with IC50 of 2 $\mu$ M, also blocks Ca(2+)-activated potassium channels.                                                                                                                                    |
| 272 | Ticlopidine HCl                      | P2RY                                    | Ticlopidine HCl is an P2 receptor inhibitor against ADP-induced platelet aggregation with IC50 of ~2 $\mu$ M.                                                                                                                                                              |
| 273 | SANT-1                               | SMO                                     | SANT-1 directly binds to Smoothed (Smo) receptor with Kd of 1.2 nM and inhibits Smo agonist effects with IC50 of 20 nM.                                                                                                                                                    |
| 274 | Ispinesib (SB-715992)                |                                         | Ispinesib (SB-715992, CK0238273) is a potent, specific and reversible inhibitor of kinesin spindle protein (KSP) with Ki app of 1.7 nM, no inhibition to CENP-E, RabK6, MCAK, MKLP1, KHC or Kif1A. Phase 1/2.                                                              |
| 275 | BTZ043 Racemate                      |                                         | BTZ043 racemate is a decaprenylphosphoryl- $\beta$ -D-ribose 2'-epimerase (DprE1) inhibitor acting as a new antimycobacterial agent that kill Mycobacterium tuberculosis.                                                                                                  |
| 276 | AZD7762                              | CHEK1,<br>CHEK2                         | AZD7762 is a potent and selective inhibitor of Chk1 with IC50 of 5 nM. It is equally potent against Chk2 and less potent against CAM, Yes, Fyn, Lyn, Hck and Lck. Phase 1.                                                                                                 |
| 277 | AVL-292                              | BTK                                     | AVL-292 is a covalent, orally active, and highly selective BTK inhibitor with IC50 of <0.5 nM, displaying at least 1400-fold selectivity over the other kinases assayed. Phase 1.                                                                                          |
| 278 | Pimobendan                           | PDE3                                    | Pimobendan is a selective inhibitor of PDE3 with IC50 of 0.32 $\mu$ M.                                                                                                                                                                                                     |
| 279 | DBeQ                                 | VCP                                     | DBeQ is a selective, potent, reversible, and ATP-competitive p97 inhibitor with IC50 of 1.5 $\mu$ M.                                                                                                                                                                       |
| 280 | Formoterol Hemifumarate              | ADRB2                                   | Formoterol hemifumarate is a potent, selective and long-acting $\beta$ 2-adrenoceptor agonist to $\beta$ 2 and $\beta$ 1 receptors with pKd of 8.12 and 5.58, respectively.                                                                                                |
| 281 | CNX-774                              | BTK                                     | CNX-774 is an irreversible, orally active, and highly selective BTK inhibitor with IC50 of <1 nM.                                                                                                                                                                          |
| 282 | Lovastatin                           | HMGCR                                   | Lovastatin is an inhibitor of HMG-CoA reductase with IC50 of 3.4 nM, used for lowering cholesterol (hypolipidemic agent).                                                                                                                                                  |
| 283 | 4 $\mu$ 8C                           | ERN1                                    | 4 $\mu$ 8C is a potent and selective IRE1 Rnase inhibitor with IC50 of 76 nM.                                                                                                                                                                                              |
| 284 | Lafutidine                           | HRH2                                    | Lafutidine, a newly developed histamine H(2)-receptor antagonist, inhibits gastric acid secretion.                                                                                                                                                                         |
| 285 | AZ191                                | DYRK1B                                  | AZ191 is a potent and selective DYRK1B inhibitor with IC50 of 17 nM, about 5- and 110-fold selectivity over DYRK1A and DYRK2, respectively.                                                                                                                                |
| 286 | (-)-Parthenolide                     | MDM2, P53                               | (-)-Parthenolide is a sesquiterpene lactone which occurs naturally in the plant feverfew (Tanacetum parthenium) and also promotes the ubiquitination of MDM2 and activates p53 cellular functions.                                                                         |
| 287 | JSH-23                               | NFKB                                    | JSH-23 is an inhibitor of NF- $\kappa$ B transcriptional activity with IC50 of 7.1 $\mu$ M.                                                                                                                                                                                |
| 288 | Pramipexole                          | DRD2S,DRD2<br>L,<br>DRD3,<br>DRD4       | Pramipexole is a partial/full D2S, D2L, D3, D4 receptor agonist with a Ki of 3.9, 2.2, 0.5 and 5.1 nM for D2S, D2L, D3, D4 receptor, respectively.                                                                                                                         |
| 289 | RepSox                               | TGFBR1                                  | RepSox is a potent and selective inhibitor of the TGF $\beta$ R-1/ALK5 with IC50 of 23 nM and 4 nM for ATP binding to ALK5 and ALK5 autophosphorylation, respectively.                                                                                                     |
| 290 | Bazedoxifene HCl                     | ESR1, ESR2                              | Bazedoxifene HCl is a novel, non-steroidal, indole-based estrogen receptor modulator (SERM) binding to both ER $\alpha$ and ER $\beta$ with IC50 of 23 nM and 89 nM.                                                                                                       |
| 291 | Golgicide A                          | GBF1                                    | Golgicide A is a potent and rapidly reversible GBF1 inhibitor.                                                                                                                                                                                                             |
| 292 | LDE225 (NVP-LDE225,Erismodegib)      | SMO                                     | LDE225 (NVP-LDE225) is a Smoothed (Smo) antagonist, inhibiting Hedgehog (Hh) signaling with IC50 of 1.3 nM (mouse) and 2.5 nM (human), respectively. Phase 3.                                                                                                              |
| 293 | Ridaforolimus (Deforolimus, MK-8669) | MTOR                                    | Ridaforolimus (Deforolimus) is a selective mTOR inhibitor with IC50 of 0.2 nM; while not classified as a prodrug, mTOR inhibition and FKBP12 binding is similar to rapamycin.                                                                                              |



|     |                                                       |                                     |                                                                                                                                                                                                                                                                                              |
|-----|-------------------------------------------------------|-------------------------------------|----------------------------------------------------------------------------------------------------------------------------------------------------------------------------------------------------------------------------------------------------------------------------------------------|
| 294 | LY2784544                                             | JAK2                                | LY2784544 is a potent JAK2 inhibitor with IC50 of 3 nM, effective in JAK2V617F, 8- and 20-fold selective versus JAK1 and JAK3. Phase 2.                                                                                                                                                      |
| 295 | SNS-314 Mesylate                                      | AURKA, AURKB, AURKC                 | SNS-314 Mesylate is a potent and selective inhibitor of Aurora A, Aurora B and Aurora C with IC50 of 9 nM, 31 nM, and 3 nM, respectively. It is less potent to Trk A/B, Flt4, Fms, Axl, c-Raf and DDR2. Phase 1.                                                                             |
| 296 | BGJ398 (NVP-BGJ398)                                   | FGFR1, FGFR2, FGFR3                 | BGJ398 (NVP-BGJ398) is a potent and selective FGFR inhibitor for FGFR1/2/3 with IC50 of 0.9 nM/1.4 nM/1 nM, >40-fold selective for FGFR versus FGFR4 and VEGFR2, and little activity to Abl, Fyn, Kit, Lck, Lyn and Yes. Phase 2.                                                            |
| 297 | Irinotecan                                            | TOP1                                | Irinotecan is a topoisomerase I inhibitor for LoVo cells and HT-29 cells with IC50 of 15.8 µM and 5.17 µM, respectively.                                                                                                                                                                     |
| 298 | OSI-420                                               | EGFR                                | OSI-420 is the active metabolite of Erlotinib (EGFR inhibitor with IC50 of 2 nM).                                                                                                                                                                                                            |
| 299 | Dutasteride                                           | SRD5A2, SRD5A1                      | Dutasteride is a dual 5-α reductase inhibitor that inhibits conversion of testosterone to dihydrotestosterone (DHT).                                                                                                                                                                         |
| 300 | Apigenin                                              | CYP2C9                              | Apigenin is a potent P450 inhibitor for CYP2C9 with IC50 of 23 pM.                                                                                                                                                                                                                           |
| 301 | Rigosertib (ON-01910)                                 | PLK1, PLK2                          | Rigosertib (ON-01910) is a non-ATP-competitive inhibitor of PLK1 with IC50 of 9 nM. It shows 30-fold greater selectivity against Plk2 and no activity to Plk3. Phase 3.                                                                                                                      |
| 302 | Forskolin                                             | ADCY4                               | Forskolin is a ubiquitous activator of eukaryotic adenylyl cyclase (AC), commonly used to raise levels of cAMP in the study and research of cell physiology.                                                                                                                                 |
| 303 | Rolipram                                              | PDE4                                | Rolipram is a PDE4-inhibitor and an anti-inflammatory agent. Phase 1.                                                                                                                                                                                                                        |
| 304 | Bupivacaine HCl                                       | ADCY4                               | Bupivacaine hydrochloride (Marcaïn) is a more potent cAMP production inhibitor with an IC50 of 2.3 µM                                                                                                                                                                                        |
| 305 | UNC669                                                | L3MBTL1                             | UNC669 is a potent and selective MBT (malignant brain tumor) inhibitor with IC50 of 6 µM for L3MBTL1, 5- and 11-fold selective over L3MBTL3 and L3MBTL4.                                                                                                                                     |
| 306 | Tioxolone                                             | CA1                                 | Tioxolone is a metalloenzyme carbonic anhydrase I inhibitor with a Ki of 91 nM.                                                                                                                                                                                                              |
| 307 | PF-4708671                                            | RPS6KB1                             | PF-4708671 is a cell-permeable inhibitor of p70 ribosomal S6 kinase (S6K1 isoform) with Ki/IC50 of 20 nM/160 nM, 400-fold greater selectivity for S6K1 than S6K2, and 4- and >20-fold selectivity for S6K1 than MSK1 and RSK1/2, respectively. First S6K1-specific inhibitor to be reported. |
| 308 | 5-hydroxymethyl Tolterodine (PNU 200577, 5-HMT, 5-HM) | CHRM1                               | 5-hydroxymethyl tolterodine (PNU 200577) is a new muscarinic receptor antagonist with Kb of 0.84 nM.                                                                                                                                                                                         |
| 309 | XAV-939                                               | WNT                                 | XAV-939 selectively inhibits Wnt/β-catenin-mediated transcription through tankyrase1/2 inhibition with IC50 of 11 nM/4 nM, regulates axin levels and does not affect CRE, NF-κB or TGF-β.                                                                                                    |
| 310 | SB742457                                              | HTR6                                | SB742457 is a highly selective 5-HT6 receptor antagonist with pKi of 9.63, exhibits >100-fold selectivity over other receptors. Phase 2.                                                                                                                                                     |
| 311 | Cinacalcet HCl                                        | CASR                                | AMG-073 represents a new class of compounds for the treatment of hyperparathyroidism.                                                                                                                                                                                                        |
| 312 | Linagliptin                                           | DPP4                                | Linagliptin is a highly potent, selective DPP-4 inhibitor with IC50 of 1 nM.                                                                                                                                                                                                                 |
| 313 | Etomidate                                             | GABR                                | Etomidate is a GABAA receptors agonist at GABAA receptors.                                                                                                                                                                                                                                   |
| 314 | Entacapone                                            | COMT                                | Entacapone inhibits catechol-O-methyltransferase (COMT) with IC50 of 151 nM.                                                                                                                                                                                                                 |
| 315 | AG-14361                                              | PARP1                               | AG14361 is a potent inhibitor of PARP1 with Ki of <5 nM. It is at least 1000-fold more potent than the benzamides.                                                                                                                                                                           |
| 316 | Moclobemide (Ro 111163)                               | MAOA                                | Moclobemide is MAO-A (5-HT) inhibitor with IC50 of 6.1 µM.                                                                                                                                                                                                                                   |
| 317 | LY411575                                              | APP, NOTCH                          | LY411575 is a potent γ-secretase inhibitor with IC50 of 0.078 nM/0.082 nM (membrane/cell-based), also inhibits Notch cleavage with with IC50 of 0.39 nM.                                                                                                                                     |
| 318 | GDC-0152                                              | XIAP, BIRC7, AP1, AP2               | GDC-0152 is a potent antagonist of XIAP-BIR3, ML-IAP-BIR3, cIAP1-BIR3 and cIAP2-BIR3 with Ki of 28 nM, 14 nM, 17 nM and 43 nM, respectively; less affinity shown to cIAP1-BIR2 and cIAP2-BIR2. Phase 1.                                                                                      |
| 319 | OC000459                                              | PTGDR2                              | OC000459 is a potent and selective D prostanoid receptor 2 (DP2) antagonist with IC50 of 13 nM.                                                                                                                                                                                              |
| 320 | NLG919                                                | IDO1                                | NLG919 is a potent IDO (indoleamine-(2,3)-dioxygenase) pathway inhibitor with Ki/EC50 of 7 nM/75 nM.                                                                                                                                                                                         |
| 321 | Levosulpiride                                         | DRD2                                | Levosulpiride is a selective antagonist for D2 dopamine receptors used as an antipsychotic and prokinetic agent.                                                                                                                                                                             |
| 322 | Imatinib (STI571)                                     | ABL1, PDGFR, KIT                    | Imatinib is a multi-target inhibitor of v-Abl, c-Kit and PDGFR with IC50 of 0.6 µM, 0.1 µM and 0.1 µM, respectively.                                                                                                                                                                         |
| 323 | DCC-2036 (Rebastinib)                                 | ABL1, SRC, LYN, FGR, HCK, KDR, FLT3 | DCC-2036 is a conformational control Bcr-Abl inhibitor for Abl1(WT) and Abl1(T315I) with IC50 of 0.8 nM and 4 nM, also inhibits SRC, LYN, FGR, HCK, KDR, FLT3, and Tie-2, and low activity to seen towards c-Kit. Phase 1/2.                                                                 |
| 324 | XL335                                                 | NR1H4                               | XL335 is a potent, selective FXR agonist with EC50 of 4 nM, highly selective versus other nuclear receptors, such as LXR, PPAR, ER and etc. Phase 1.                                                                                                                                         |
| 325 | Nilvadipine                                           | CACNA1C                             | Nilvadipine is a potent calcium channel blocker with an IC50 of 0.03 nM.                                                                                                                                                                                                                     |
| 326 | CHIR-98014                                            | GSK3A, GSK3B                        | CHIR-98014 is a potent GSK-3α/β inhibitor with IC50 of 0.65 nM/0.58 nM, with the ability to distinguish GSK-3 from its closest homologs Cdc2 and ERK2.                                                                                                                                       |
| 327 | GW4064                                                | NR1H4                               | GW4064 is an agonist of farnesoid X receptor (FXR) with EC50 of 65 nM.                                                                                                                                                                                                                       |
| 328 | PF-5274857                                            | SMO                                 | PF-5274857 is a potent and selective Smoothed (Smo) antagonist, inhibits Hedgehog (Hh) signaling with IC50 and Ki of 5.8 nM and 4.6 nM, respectively, and can penetrate the blood-brain barrier.                                                                                             |
| 329 | GDC-0068                                              | AKT1, AKT2, AKT3                    | GDC-0068 is a highly selective pan-Akt inhibitor targeting Akt1/2/3 with IC50 of 5 nM/18 nM/8 nM, 620-fold selectivity over PKA. Phase 2.                                                                                                                                                    |

|     |                              |                                                                                      |                                                                                                                                                                                                                                                                                            |
|-----|------------------------------|--------------------------------------------------------------------------------------|--------------------------------------------------------------------------------------------------------------------------------------------------------------------------------------------------------------------------------------------------------------------------------------------|
| 330 | JNJ-1661010                  | FAAH                                                                                 | JNJ-1661010 is a potent and selective FAAH inhibitor with IC50 of 10 nM (rat) and 12 nM (human), exhibits >100-fold selectivity for FAAH-1 when compared to FAAH-2.                                                                                                                        |
| 331 | VU 0364770                   | GRM4                                                                                 | VU 0364770 is a positive allosteric modulator(PAM) of mGlu4 with EC50 of 1.1 µM, exhibits insignificant activity at 68 other receptors, including other mGlu subtypes.                                                                                                                     |
| 332 | U-104                        | CA12                                                                                 | U-104 is a potent carbonic anhydrase (CA) inhibitor for CA IX and CA XII with Ki of 45.1 nM and 4.5 nM, respectively, very low inhibition for CA I and CA II.                                                                                                                              |
| 333 | Daunorubicin HCl             | TOP2                                                                                 | Daunorubicin HCl inhibits both DNA and RNA synthesis and inhibits DNA synthesis with Ki of 0.02 µM.                                                                                                                                                                                        |
| 334 | PF-562271                    | PTK2                                                                                 | PF-562271 is a potent, ATP-competitive, reversible inhibitor of FAK with IC50 of 1.5 nM, ~10-fold less potent for Pyk2 than FAK and >100-fold selectivity against other protein kinases, except for some CDKs.                                                                             |
| 335 | AZD3463                      | ALK, IGF1R                                                                           | AZD3463 is a novel orally bioavailable ALK inhibitor with Ki of 0.75 nM, which also inhibits IGF1R with equivalent potency.                                                                                                                                                                |
| 336 | IOX2                         | EGLN1                                                                                | IOX2 is a potent inhibitor of HIF-1α prolyl hydroxylase-2 (PHD2) with IC50 of 21 nM, >100-fold selectivity over JMJD2A, JMJD2C, JMJD2E, JMJD3, or the 2OG oxygenase FIH.                                                                                                                   |
| 337 | IMD 0354                     | IKBKB, CHUK                                                                          | IMD-0354 is an IKKβ inhibitor and blocks IκBα phosphorylation in NF-κB pathway.                                                                                                                                                                                                            |
| 338 | CRT0044876                   | APE1                                                                                 | CRT0044876 is a potent and selective APE1 inhibitor with IC50 of ~3 µM.                                                                                                                                                                                                                    |
| 339 | TCID                         | UCHL3                                                                                | TCID is a DUB inhibitor for ubiquitin C-terminal hydrolase L3 with IC50 of 0.6 µM, 125-fold selective to L1.                                                                                                                                                                               |
| 340 | LB42708                      | FNTA                                                                                 | LB42708 is an orally active farnesyltransferase (FTase) inhibitor with IC50 of 0.8, 1.2, and 2.0 nM toward H-ras, N-ras, and K-ras, respectively.                                                                                                                                          |
| 341 | Necrostatin-1                | RIPK1                                                                                | Necrostatin-1 is a specific RIP1 inhibitor and inhibits TNF-α-induced necroptosis with EC50 of 490 nM.                                                                                                                                                                                     |
| 342 | Empagliflozin (BI 10773)     | SLC5A2                                                                               | Empagliflozin (BI-10773) is a potent and selective SGLT-2 inhibitor with IC50 of 3.1 nM, exhibits >300-fold selectivity over SGLT-1, 4, 5 and 6. Phase 3.                                                                                                                                  |
| 343 | SU11274                      | MET                                                                                  | SU11274 is a selective Met inhibitor with IC50 of 10 nM, no effects on PGDFRβ, EGFR or Tie2.                                                                                                                                                                                               |
| 344 | Bortezomib (PS-341)          | PSMC1                                                                                | Bortezomib (PS-341) is a potent 20S proteasome inhibitor with Ki of 0.6 nM.                                                                                                                                                                                                                |
| 345 | YM155 (Sepantronium Bromide) | BIRC5                                                                                | YM155 is a potent survivin suppressant by inhibiting Survivin promoter activity with IC50 of 0.54 nM; does not significantly inhibit SV40 promoter activity, but is observed to slightly inhibit the interaction of Survivin with XIAP. Phase 1/2.                                         |
| 346 | Lenalidomide (CC-5013)       | TNF                                                                                  | Lenalidomide (CC-5013) is a TNF-α secretion inhibitor with IC50 of 13 nM.                                                                                                                                                                                                                  |
| 347 | Ivacaftor (VX-770)           | CFTR                                                                                 | Ivacaftor (VX-770) is a potentiator of CFTR targeting G551D-CFTR and F508del-CFTR with EC50 of 100 nM and 25 nM, respectively.                                                                                                                                                             |
| 348 | AUY922 (NVP-AUY922)          | HSP90A, HSP90B                                                                       | AUY922 (NVP-AUY922) is a highly potent HSP90 inhibitor for HSP90α/β with IC50 of 13 nM /21 nM, weaker potency against the HSP90 family members GRP94 and TRAP-1, exhibits the tightest binding of any small-molecule HSP90 ligand. Phase 1/2.                                              |
| 349 | Agomelatine                  | HTR2C                                                                                | Agomelatine is classified as a norepinephrine-dopamine disinhibitor (NDDI) due to its antagonism of the 5-HT2C receptor.                                                                                                                                                                   |
| 350 | 17-AAG (Tanespimycin)        | HSP90                                                                                | 17-AAG is a potent HSP90 inhibitor with IC50 of 5 nM, having a 100-fold higher binding affinity for HSP90 derived from tumour cells than HSP90 from normal cells.                                                                                                                          |
| 351 | SP600125                     | JKAMP, MAPK9, MAPK10; MAP2K4; MAP2K3, MAP2K6, AKT1, PRKC; MAPK1, MAPK14, CHEK1, EGFR | SP600125 is a broad-spectrum JNK inhibitor for JNK1, JNK2 and JNK3 with IC50 of 40 nM, 40 nM and 90 nM, respectively; 10-fold greater selectivity against MKK4, 25-fold greater selectivity against MKK3, MKK6, PKB, and PKCα, and 100-fold selectivity against ERK2, p38, Chk1, EGFR etc. |
| 352 | CEP-18770 (Delanzomib)       | PSMC1                                                                                | CEP-18770 is an orally active inhibitor of the chymotrypsin-like activity of proteasome with IC50 of 3.8 nM, with only marginal inhibition of the tryptic and peptidylglutamyl activities of the proteasome. Phase 1/2.                                                                    |
| 353 | Aprepitant                   | TACR1                                                                                | Aprepitant is a potent and selective neurokinin-1 receptor antagonist.                                                                                                                                                                                                                     |
| 354 | Fluvoxamine maleate          |                                                                                      | Fluvoxamine maleate is a selective serotonin (5-HT) reuptake inhibitor (SSRI).                                                                                                                                                                                                             |
| 355 | Oligomycin A                 | ATPAF1                                                                               | Oligomycin A is an inhibitor of ATP synthase, inhibits oxidative phosphorylation and all the ATP-dependent processes occurring on the coupling membrane of mitochondria.                                                                                                                   |
| 356 | Ginkgolide A                 | GABR                                                                                 | Ginkgolide A is an extract from in Ginkgo biloba and a g-aminobutyric acid (GABA) antagonist with a Ki of 14.5 µM.                                                                                                                                                                         |
| 357 | Cryptotanshinone             | STAT3                                                                                | Cryptotanshinone (CPT) is a STAT3 inhibitor with IC50 of 4.6 µM, strongly inhibits phosphorylation of STAT3 Tyr705, with a small effect on STAT3 Ser727, but none against STAT1 nor STAT5.                                                                                                 |
| 358 | ICG-001                      | WNT                                                                                  | ICG-001 antagonizes Wnt/β-catenin/TCF-mediated transcription and specifically binds to element-binding protein (CBP) with IC50 of 3 µM, but is not the related transcriptional coactivator p300.                                                                                           |
| 359 | Stattic                      | STAT3                                                                                | Stattic, the first nonpeptidic small molecule, potently inhibits STAT3 activation and nuclear translocation with IC50 of 5.1 µM, highly selectivity over STAT1.                                                                                                                            |
| 360 | SC144                        | IL6ST                                                                                | SC144 is an orally active small-molecule gp130 inhibitor.                                                                                                                                                                                                                                  |
| 361 | SRPIN340                     | SRPK1                                                                                | SRPIN340 is a selective SRPK inhibitor with Ki of 0.89 µM for SRPK1, showing no significant inhibitory activity against more than 140 other kinases.                                                                                                                                       |

|     |                                 |                                                                                                                                    |                                                                                                                                                                                                                                                            |
|-----|---------------------------------|------------------------------------------------------------------------------------------------------------------------------------|------------------------------------------------------------------------------------------------------------------------------------------------------------------------------------------------------------------------------------------------------------|
| 362 | Trelagliptin                    | DPP4                                                                                                                               | Trelagliptin is a highly selective, long-acting DPP-4 inhibitor. Phase 3.                                                                                                                                                                                  |
| 363 | Panobinostat (LBH589)           | HDAC                                                                                                                               | Panobinostat (LBH589) is a novel broad-spectrum HDAC inhibitor with IC50 of 5 nM. Phase 3.                                                                                                                                                                 |
| 364 | VX-680 (Tozasertib, MK-0457)    | AURKA                                                                                                                              | VX-680 (Tozasertib, MK-0457) is a pan-Aurora inhibitor, mostly against Aurora A with Kiapp of 0.6 nM, less potent towards Aurora B/Aurora C and 100-fold more selective for Aurora A than 55 other kinases. Phase 2.                                       |
| 365 | GDC-0941                        | PIK3CA, PIK3CD                                                                                                                     | GDC-0941 is a potent inhibitor of PI3Ka/ $\delta$ with IC50 of 3 nM, with modest selectivity against p110 $\beta$ (11-fold) and p110 $\gamma$ (25-fold).                                                                                                   |
| 366 | OSU-03012 (AR-12)               | PDK1                                                                                                                               | OSU-03012 is a potent inhibitor of recombinant PDK-1 with IC50 of 5 $\mu$ M and 2-fold increase in potency over OSU-02067.                                                                                                                                 |
| 367 |                                 | Akt1, PKC $\theta$ , Akt3, PKC $\delta$ , PKC $\epsilon$ , PKG1 $\beta$ , PKC $\eta$ , PrkX, Akt2, PKC $\beta$ , PKA, PKG1 $\beta$ | GSK690693 is a pan-Akt inhibitor targeting Akt1/2/3 with IC50 of 2 nM/13 nM/9 nM in cell-free assays, also sensitive to the AGC kinase family: PKA, PrkX and PKC isozymes. Phase 1.                                                                        |
| 368 | Everolimus (RAD001)             | MTOR                                                                                                                               | Everolimus (RAD001) is an mTOR inhibitor of FKBP12 with IC50 of 1.6-2.4 nM.                                                                                                                                                                                |
| 369 | MK-8245                         | SCD                                                                                                                                | MK-8245 is a liver-targeting inhibitor of stearyl-CoA desaturase (SCD) with IC50 of 1 nM for human SCD1 and 3 nM for both rat SCD1 and mouse SCD1, with anti-diabetic and anti-dyslipidemic efficacy. Phase 2.                                             |
| 370 | Aniracetam                      | GRIA1,                                                                                                                             | Aniracetam is a nootropics and neuroprotective drug.                                                                                                                                                                                                       |
| 371 | Doxazosin Mesylate              | ADRA1A                                                                                                                             | Doxazosin mesylate is an alpha-1 adrenergic receptor blocker.                                                                                                                                                                                              |
| 372 | Ginkgolide B                    | PTAFR                                                                                                                              | Ginkgolide B is a PAFR antagonist with IC50 of 3.6 $\mu$ M.                                                                                                                                                                                                |
| 373 | Tosedostat (CHR2797)            | LAP3, NPEPPS, ANPEP                                                                                                                | CHR-2797 is an aminopeptidase inhibitor for LAP, PuSA and Aminopeptidase N with IC50 of 100 nM, 150 nM and 220 nM, respectively, and does not effectively inhibit either PILSAP, MetAP-2, LTA4 hydrolase, or MetAP-2. Phase 2.                             |
| 374 | Rebamipide                      | CCKAR                                                                                                                              | Rebamipide is a cholecystokinin type 1 (CCK1) receptor inhibitor for inhibiting [125I]BH-CCK-8S with IC50 of 37.7 $\mu$ M.                                                                                                                                 |
| 375 | Rasagiline Mesylate             | MAOB                                                                                                                               | Rasagiline Mesylate is a new MAO-B inhibitor for the treatment of idiopathic Parkinson's disease.                                                                                                                                                          |
| 376 | PD128907 HCl                    | DDR3                                                                                                                               | PD 128907 HCl is a potent and selective dopamine D3 receptor agonist, with EC50 of 0.64 nM, exhibits 53-fold selectivity over dopamine D2 receptor.                                                                                                        |
| 377 | Apatinib                        | KDR                                                                                                                                | Apatinib is an orally bioavailable, selective VEGFR2 inhibitor with IC50 of 1 nM.                                                                                                                                                                          |
| 378 | ADX-47273                       | GRM5                                                                                                                               | ADX47273 is a potent and specific mGlu5 positive allosteric modulator(PAM) with EC50 of 0.17 $\mu$ M, showing no activity at other mGlu subtypes.                                                                                                          |
| 379 | AZ 3146                         | TTK, CENPE                                                                                                                         | AZ3146 is a selective Mps1 inhibitor with IC50 of ~35 nM, contributes to recruitment of CENP-E (kinesin-related motor protein), less potent to FAK, JNK1, JNK2, and Kit.                                                                                   |
| 380 | VU 0357121                      | GRM5                                                                                                                               | VU0357121 is a novel positive allosteric modulator (PAM) of mGlu5 with EC50 of 33 nM, is inactive or very weakly antagonizing at other mGlu receptor subtypes.                                                                                             |
| 381 | (-)-MK 801 Maleate              | GRIN                                                                                                                               | MK-801 is a potent, selective and non-competitive NMDA receptor antagonist with Kd of 37.2 nM in rat brain membranes.                                                                                                                                      |
| 382 | Mirabegron                      | ADRB3                                                                                                                              | Mirabegron is a selective $\beta$ 3-adrenoceptor agonist with EC50 of 22.4 nM.                                                                                                                                                                             |
| 383 | AP26113                         | ALK                                                                                                                                | AP26113 is a potent ALK inhibitor with IC50 of 0.62 nM, demonstrated ability overcome Crizotinib resistance mediated by a L1196M mutation. Phase 1/2.                                                                                                      |
| 384 | Birinapant                      | DIABLO (AP1)                                                                                                                       | Birinapant is a SMAC mimetic antagonist, mostly to cIAP1 with Kd of <1 nM, less potent to XIAP. Phase 1/2.                                                                                                                                                 |
| 385 | AZD1981                         | PTGDR2                                                                                                                             | AZD1981 is a potent, selective CRTh2 (DP2) receptor antagonist with IC50 of 4 nM, showing >1000-fold selectivity over more than 340 other enzymes and receptors, including DP1.                                                                            |
| 386 | LDK378                          | ALK                                                                                                                                | LDK378 is potent inhibitor against ALK with IC50 of 0.2 nM, shows 40- and 35-fold selectivity against IGF-1R and InsR, respectively. Phase 2.                                                                                                              |
| 387 | (S)-crizotinib                  | NUDT1                                                                                                                              | (S)-crizotinib, the (S)-enantiomer of crizotinib, is a potent MTH1 (NUDT1) inhibitor with IC50 of 72 nM.                                                                                                                                                   |
| 388 | ZM 447439                       | AURKA, AURKB                                                                                                                       | ZM 447439 is a selective and ATP-competitive inhibitor for Aurora A and Aurora B with IC50 of 110 nM and 130 nM, respectively. It is more than 8-fold selective for Aurora A/B than MEK1, Src, Lck and has little effect againstCDK1/2/4, Plk1, Chk1, etc. |
| 389 | BX-912                          | PDK1                                                                                                                               | BX912 is a potent and specific PDK1 inhibitor with IC50 of 12 nM, 9- and 105- fold greater selectivity for PDK1 than PKA and PKC, respectively. In comparison to GSK3 $\beta$ , selectivity for PDK1 is 600-fold.                                          |
| 390 | Tadalafil                       | PDE5                                                                                                                               | Tadalafil is a PDE-5 inhibitor with IC50 of 1.8 nM.                                                                                                                                                                                                        |
| 391 | Elvitegravir (GS-9137, JTK-303) |                                                                                                                                    | Elvitegravir (EVG, JTK-303/GS-9137) is an HIV integrase inhibitor for HIV-1 IIB, HIV-2 EHO and HIV-2 ROD with IC50 of 0.7 nM, 2.8 nM and 1.4 nM, respectively.                                                                                             |
| 392 | Fostamatinib (R788)             | SYK                                                                                                                                | Fostamatinib (R788), a prodrug of the active metabolite R406, is a Syk inhibitor with IC50 of 41 nM, strongly inhibits Syk but not Lyn, 5-fold less potent to Flt3. Phase 2.                                                                               |
| 393 | GSK J4 HCl                      | KDM6A, KDM6B                                                                                                                       | GSK J4 HCl is a cell permeable prodrug of GSK J1, which is the first selective inhibitor of the H3K27 histone demethylase JMJD3 and UTX with IC50 of 60 nM and inactive against a panel of demethylases of the JMJ family.                                 |
| 394 | TCS 359                         | FLT3                                                                                                                               | TCS 359 is a potent FLT3 inhibitor with IC50 of 42 nM.                                                                                                                                                                                                     |
| 395 | Carvedilol                      | ADRB1                                                                                                                              | Carvedilol is a non-selective beta blocker/alpha-1 blocker with an IC50 of 3.8 $\mu$ M for inhibition of LDL oxidation.                                                                                                                                    |
| 396 | Naftopidil                      | ADRA1A                                                                                                                             | Naftopidil (Flivas) is a selective $\alpha$ 1-adrenergic receptor antagonist or alpha blocker with a Ki of 58.3 nM.                                                                                                                                        |

|     |                              |                                            |                                                                                                                                                                                                                                                                |
|-----|------------------------------|--------------------------------------------|----------------------------------------------------------------------------------------------------------------------------------------------------------------------------------------------------------------------------------------------------------------|
| 397 | ML133 HCl                    | KCNJ2                                      | ML133 is a selective potassium channel inhibitor for Kir2.1 with IC50 of 1.8 $\mu$ M (pH 7.4) and 290 nM (pH 8.5), has no effect on Kir1.1 and weak activity for Kir4.1 and Kir7.1.                                                                            |
| 398 | T0070907                     | PPARG                                      | T0070907 is a potent and selective PPAR $\gamma$ inhibitor with IC50 of 1 nM, with a >800-fold selectivity over PPAR $\alpha$ and PPAR $\delta$ .                                                                                                              |
| 399 | Gliquidone                   | KCNJ                                       | Gliquidone is an ATP-sensitive K <sup>+</sup> channel antagonist with IC50 of 27.2 nM.                                                                                                                                                                         |
| 400 | SC-514                       | IKBKB                                      | SC-514 is an orally active, ATP-competitive IKK-2 inhibitor with IC50 of 3-12 $\mu$ M, blocks NF- $\kappa$ B-dependent gene expression, does not inhibit other IKK isoforms or other serine-threonine and tyrosine kinases.                                    |
| 401 | ZCL278                       | CDC42                                      | ZCL278 is a selective Cdc42 GTPase inhibitor with Kd of 11.4 $\mu$ M.                                                                                                                                                                                          |
| 402 | Caffeic Acid Phenethyl Ester | NFKB                                       | Caffeic acid phenethyl ester is a potent and specific inhibitor of NF- $\kappa$ B activation, and also displays antioxidant, immunomodulatory and antiinflammatory activities.                                                                                 |
| 403 | VU 0364439                   | GRM4                                       | VU 0364439 is a mGlu4 positive allosteric modulator (PAM), with EC50 of 19.8 nM.                                                                                                                                                                               |
| 404 | SB431542                     | TGFBR1                                     | SB431542 is a potent and selective inhibitor of ALK5 with IC50 of 94 nM, 100-fold more selective for ALK5 than p38 MAPK and other kinases.                                                                                                                     |
| 405 | Odanacatib (MK-0822)         | CTSK                                       | Odanacatib (MK 0822) is a potent, selective, and neutral inhibitor of cathepsin K (human/rabbit) with IC50 of 0.2 nM/1 nM, and demonstrated high selectivity versus off-target cathepsin B, L, S. Phase 3.                                                     |
| 406 | Celecoxib                    | PTGS2                                      | Celecoxib is a selective COX-2 inhibitor with IC50 of 40 nM.                                                                                                                                                                                                   |
| 407 | Etodolac                     | PTGS1                                      | Etodolac (Lodine) is a COX inhibitor with an IC50 of 53.5 nM.                                                                                                                                                                                                  |
| 408 | Isotretinoin                 |                                            | It was developed to be used as a chemotherapy medication for the treatment of brain cancer, pancreatic cancer and more.                                                                                                                                        |
| 409 | Stavudine (d4T)              |                                            | Stavudine is a nucleoside analog reverse transcriptase inhibitor (NRTI) active against HIV.                                                                                                                                                                    |
| 410 | VX-745                       | MAPK14                                     | VX-745 is a potent and selective inhibitor of p38 $\alpha$ with IC50 of 10 nM, 22-fold greater selectivity versus p38 $\beta$ and no inhibition to p38 $\gamma$ .                                                                                              |
| 411 | GSK429286A                   | ROCK1, ROCK2                               | GSK429286A is a selective inhibitor of ROCK1 and ROCK2 with IC50 of 14 nM and 63 nM, respectively.                                                                                                                                                             |
| 412 | SB408124                     | HCRTR1                                     | SB408124 (Tocris-1963) is a non-peptide antagonist for OX1 receptor with Ki of 57 nM and 27 nM in both whole cell and membrane, respectively, exhibits 50-fold selectivity over OX2 receptor.                                                                  |
| 413 | H 89 2HCl                    | PRKAC                                      | H 89 2HCl is a potent PKA inhibitor with Ki of 48 nM, 10-fold selective for PKA than PKG, greater than 500-fold selectivity than PKC, MLCK, calmodulin kinase II and casein kinase I/II.                                                                       |
| 414 | Mubritinib (TAK 165)         | ERBB2                                      | Mubritinib (TAK-165) is a potent inhibitor of HER2/ErbB2 with IC50 of 6 nM; no activity to EGFR, FGFR, PDGFR, JAK1, Src and Blk.                                                                                                                               |
| 415 | BMS-378806                   | CD4                                        | BMS-378806 selectively inhibits the binding of HIV-1 gp120 to the CD4receptor with EC50 of 0.85-26.5 nM in virus.                                                                                                                                              |
| 416 | Ki16198                      | LPAR1, LPAR3                               | Ki16198 is the methyl ester of Ki16425, which is a LPA antagonist and inhibits LPA1- and LPA3-induced inositol phosphate production with Ki of 0.34 $\mu$ M and 0.93 $\mu$ M, respectively, shows weaker inhibition for LPA2, no activity at LPA4, LPA5, LPA6. |
| 417 | AZ20                         | ATR                                        | AZ20 is a novel potent and selective inhibitor of ATR kinase with IC50 of 5 nM, 8-fold selectivity over mTOR.                                                                                                                                                  |
| 418 | AMG-517                      | TRPV1                                      | AMG 517 is a potent and selective TRPV1 antagonist, antagonizes capsaicin, proton, and heat activation of TRPV1 with IC50 of 0.76 nM, 0.62 nM and 1.3 nM.                                                                                                      |
| 419 | NMS-873                      | VCP                                        | NMS-873 is an allosteric and specific p97 inhibitor with IC50 of 30 nM.                                                                                                                                                                                        |
| 420 | Sorafenib                    | RAF1, BRAF, KDR                            | Sorafenib is a multikinase inhibitor of Raf-1, B-Raf and VEGFR-2 with IC50 of 6 nM, 22 nM and 90 nM, respectively.                                                                                                                                             |
| 421 | NH125                        | EEF2K, PRKC, PRKA, CAMK2, Histidine Kinase | NH125 is a selective eEF-2 kinase inhibitor with IC50 of 60 nM, >125-fold selectivity over PKC, PKA, and CaMKII, and also a potent histidine kinase inhibitor.                                                                                                 |
| 422 | Sal003                       | EIF2A                                      | Sal003 is a potent and cell-permeable eIF-2 $\alpha$ phosphatase inhibitor.                                                                                                                                                                                    |
| 423 | Tariquidar                   | ABCB1                                      | Tariquidar (XR9576) is a potent and selective noncompetitive inhibitor of P-glycoprotein with Kd of 5.1 nM, reverses drug resistance in MDR cell Lines. Phase 3.                                                                                               |
| 424 | Lomeguatrib                  | MGMT                                       | Lomeguatrib is a potent inhibitor of O6-alkylguanine-DNA-alkyltransferase with IC50 of 5 nM.                                                                                                                                                                   |
| 425 | BI 2536                      | PLK1, PLK2, PLK3                           | BI2536 is a potent Plk1 inhibitor with IC50 of 0.83 nM. It shows 4- and 11-fold greater selectivity against Plk2 and Plk3. Phase 2.                                                                                                                            |
| 426 | Imidapril HCl                | ACE                                        | Imidapril HCl is a angiotensin-converting enzyme (ACE) inhibitor with IC50 of 2.6 nM, used for the treatment of hypertension.                                                                                                                                  |
| 427 | GSK461364                    | PLK1, PLK2, PLK3                           | GSK461364 inhibits purified Plk1 with Ki of 2.2 nM. It is more than 1000-fold selective against Plk2/3. Phase 1.                                                                                                                                               |
| 428 | Gliclazide                   | KCNJ                                       | Gliclazide (Diamicron) is a whole-cell beta-cell ATP-sensitive potassium currents blocker with an IC50 of 184 $\pm$ 30 nM.                                                                                                                                     |
| 429 | Sotrastaurin                 | PRKC (especially PRKCQ; inactive PRKCZ) to | Sotrastaurin is a potent and selective pan-PKC inhibitor, mostly for PKC $\theta$ with Ki of 0.22 nM; inactive to PKC $\zeta$ . Phase 1/2.                                                                                                                     |
| 430 | BI-D1870                     | RPS6KA1, RPS6KA2,                          | BI-D1870 is an ATP-competitive inhibitor of S6 ribosome for RSK1/2/3/4 with IC50 of 31 nM/24 nM/18 nM/15 nM, respectively; 10- to 100-fold selectivity for RSK than MST2, GSK-3 $\beta$ , MARK3, CK1 and Aurora B.                                             |

|     |                                                       |                                     |                                                                                                                                                                                                                                                                                                                                                                                                                                                                                                                                                                                                                                                                                                                                                                                                                                                                                                                                                                                                   |
|-----|-------------------------------------------------------|-------------------------------------|---------------------------------------------------------------------------------------------------------------------------------------------------------------------------------------------------------------------------------------------------------------------------------------------------------------------------------------------------------------------------------------------------------------------------------------------------------------------------------------------------------------------------------------------------------------------------------------------------------------------------------------------------------------------------------------------------------------------------------------------------------------------------------------------------------------------------------------------------------------------------------------------------------------------------------------------------------------------------------------------------|
|     |                                                       | RPS6KA3,<br>RPS6KA4                 |                                                                                                                                                                                                                                                                                                                                                                                                                                                                                                                                                                                                                                                                                                                                                                                                                                                                                                                                                                                                   |
| 431 | Go 6983                                               | PRKCA,<br>PRKCB,<br>PRKCG,<br>PRKCD | Go 6983 is a pan-PKC inhibitor against for PKC $\alpha$ , PKC $\beta$ , PKC $\gamma$ and PKC $\delta$ with IC50 of 7 nM, 7 nM, 6 nM and 10 nM, respectively; less potent to PKC $\zeta$ and inactive to PKC $\mu$ .                                                                                                                                                                                                                                                                                                                                                                                                                                                                                                                                                                                                                                                                                                                                                                               |
| 432 | MNS (3,4-Methylenedioxy- $\beta$ -nitrostyrene, MDBN) | SYK, SRC,<br>VCP                    | MNS is a tyrosine kinases inhibitor, inhibits Syk, Src, p97 with IC50 of 2.5 $\mu$ M, 29.3 $\mu$ M and 1.7 $\mu$ M, respectively.                                                                                                                                                                                                                                                                                                                                                                                                                                                                                                                                                                                                                                                                                                                                                                                                                                                                 |
| 433 | THZ1                                                  | CDK7                                | THZ1 uses a unique mechanism, combining ATP-site and allosteric covalent binding, as a means of attaining potency and selectivity for CDK7. THZ1 irreversibly inhibits RNAPII CTD phosphorylation by covalently targeting a unique cysteine located outside the kinase domain of CDK7. THZ1, but not THZ1-R, completely inhibits the phosphorylation of the established intracellular CDK7 substrate RNAPII CTD at Ser 5 and Ser 7, with concurrent loss of Ser 2 phosphorylation at 250 nM in Jurkat cells. THZ1 exhibits strong antiproliferative effects across a broad range of cancer cell lines from various cancer types. In Jurkat cells, low-dose THZ1 has a profound effect on a small subset of genes, including the key regulator RUNX1, thus contributing to subsequent loss of the greater gene expression program and cell death. THZ1 causes defects in Pol II (polymerase II) phosphorylation, co-transcriptional capping, promoter proximal pausing, and productive elongation. |

**Table S3. Compounds killing >50% of 2 representative T-ALL PDTX cells in RPMI or StemSpan (SS) media supplemented with interleukins.**

**PDTX 3053-T7**

| <b>RPMI</b>                   |                                                                                                  | <b>SS</b>                     |                                                                                                     |
|-------------------------------|--------------------------------------------------------------------------------------------------|-------------------------------|-----------------------------------------------------------------------------------------------------|
| <b>398 compounds</b>          |                                                                                                  | <b>145 compounds</b>          |                                                                                                     |
| <b>Compound</b>               | <b>Target</b>                                                                                    | <b>Compound</b>               | <b>Target</b>                                                                                       |
| FG-4592                       | EPAS1, EPO                                                                                       | FG-4592                       | EPAS1, EPO                                                                                          |
| Tolfenamic Acid               | PTGS2                                                                                            | Rizatriptan Benzoate          | HTR1A                                                                                               |
| Ramelteon                     | MTNR1A, MTNR1B                                                                                   | Fulvestrant                   | ESR                                                                                                 |
| Trospium chloride             | CHRM1                                                                                            | Tolfenamic Acid               | PTGS2                                                                                               |
| A-769662                      | PRKAA1                                                                                           | Ramelteon                     | MTNR1A, MTNR1B                                                                                      |
| Losartan Potassium (DuP 753)  | AGTR                                                                                             | Trospium chloride             | CHRM1                                                                                               |
| Tolazoline HCl                | ADRA1A                                                                                           | Granisetron HCl               | HTR3A                                                                                               |
| Tenofovir Disoproxil Fumarate | 0                                                                                                | A-769662                      | PRKAA1                                                                                              |
| Ataluren (PTC124)             | CFTR                                                                                             | Losartan Potassium (DuP 753)  | AGTR                                                                                                |
| Candesartan                   | AGTR                                                                                             | Tolazoline HCl                | ADRA1A                                                                                              |
| Belinostat (PXD101)           | HDAC                                                                                             | Tenofovir Disoproxil Fumarate | 0                                                                                                   |
| Semagacestat (LY450139)       | APP, NOTCH                                                                                       | Ataluren (PTC124)             | CFTR                                                                                                |
| NVP-ADW742                    | IGFR1                                                                                            | Candesartan                   | AGTR                                                                                                |
| NSC 319726                    | TP53 (R175)                                                                                      | Belinostat (PXD101)           | HDAC                                                                                                |
| STF-118804                    | NAMPT                                                                                            | Semagacestat (LY450139)       | APP, NOTCH                                                                                          |
| Rimonabant                    | CNR1                                                                                             | NVP-ADW742                    | IGFR1                                                                                               |
| FLI-06                        | NOTCH                                                                                            | NSC 319726                    | TP53 (R175)                                                                                         |
| Sitaxentan sodium             | EDNRA                                                                                            | Icotinib                      | EGFR                                                                                                |
| ABT-263 (Navitoclax)          | BCL2, BCL2L1, BCL2L2                                                                             | Ilomastat (GM6001, Galardin)  | MMP1, MMP2, MMP3, MMP7, MMP8, MMP9, MMP12, MMP14, MMP26                                             |
| Brinzolamide                  | CA2                                                                                              | Rivaroxaban                   | F10                                                                                                 |
| Nilotinib (AMN-107)           | ABL1                                                                                             | STF-118804                    | NAMPT                                                                                               |
| Tranylcypromine (2-PCPA) HCl  | MAO, CYP2A6                                                                                      | Rimonabant                    | CNR1                                                                                                |
| Tandutinib (MLN518)           | FLT3, PDGFR KIT                                                                                  | FLI-06                        | NOTCH                                                                                               |
| Zebularine                    | DNMT1, DNMT3A, DNMT3B                                                                            | Sitaxentan sodium             | EDNRA                                                                                               |
| MLN8054                       | AURKA                                                                                            | ABT-263 (Navitoclax)          | BCL2, BCL2L1, BCL2L2                                                                                |
| PR-619                        | ATXN7L3, BAP1, OTUB1, OTUD1, OTUD6A, OTUD7A, UBB, UCHL3, USP1-2-4-5-7-8-14-15-17-26-30-366, YOD1 | Brinzolamide                  | CA2                                                                                                 |
| Roxatidine Acetate HCl        | HRH2                                                                                             | Tandutinib (MLN518)           | FLT3, PDGFR KIT                                                                                     |
| GSK1904529A                   | IGFR1, INSR                                                                                      | MLN8054                       | AURKA                                                                                               |
| Atorvastatin Calcium          | HMGCR                                                                                            | PR-619                        | ATXN7L3, BAP1, OTUB1, OTUD1, OTUD6A, OTUD7A, UBB, UCHL3, USP1, USP2, USP4, USP5, USP7, USP8, USP14, |

|                                      |                     |                                      |                                               |
|--------------------------------------|---------------------|--------------------------------------|-----------------------------------------------|
|                                      |                     |                                      | USP15, USP17,<br>USP26, USP30,<br>USP36, YOD1 |
| SNS-032 (BMS-387032)                 | CDK2                | Roxatidine Acetate HCl               | HRH2                                          |
| Naltrexone HCl                       | OPRK1, OPRM1, OPRD1 | GSK1904529A                          | IGFR1, INSR                                   |
| Ganetespib (STA-9090)                | HSP90               | Atorvastatin Calcium                 | HMGCR                                         |
| CGS 21680 HCl                        | ADORA2A             | SNS-032 (BMS-387032)                 | CDK2                                          |
| Vemurafenib (PLX4032, RG7204)        | BRAF (V600E)        | Vemurafenib (PLX4032, RG7204)        | BRAF (V600E)                                  |
| Pancuronium dibromide                | 0                   | Pancuronium dibromide                | 0                                             |
| Loratadine                           | HRH1                | Loratadine                           | HRH1                                          |
| PNU-120596                           | 0                   | PNU-120596                           | 0                                             |
| Ruxolitinib (INCB018424)             | JAK1, JAK2          | AZD6482                              | PIK3CB                                        |
| GW3965 HCl                           | NR1H3, NR1H2        | Safinamide Mesylate                  | MAOB, MAOA                                    |
| AZD6482                              | PIK3CB              | Tenofovir                            | 0                                             |
| SB705498                             | TRPV1               | P22077                               | USP7, USP47                                   |
| Safinamide Mesylate                  | MAOB, MAOA          | Aloxistatin                          | 0                                             |
| Tenofovir                            | 0                   | Irinotecan HCl Trihydrate            | TOP1                                          |
| P22077                               | USP7, USP47         | Ferrostatin-1 (Fer-1)                | VDAC                                          |
| Aloxistatin                          | 0                   | OTX015                               | BRD2, BRD3, BRD4                              |
| NSC697923                            | UBE2                | Ibrutinib (PCI-32765)                | BTK                                           |
| Apixaban                             | F10                 | 4E1RCat                              | EIF4E                                         |
| ML347                                | ACVR1, ACVRL1       | Tofacitinib (CP-690550, Tasocitinib) | JAK3                                          |
| Irinotecan HCl Trihydrate            | TOP1                | PHA-793887                           | CDK2, CDK5, CDK7                              |
| SSR128129E                           | FGFR1               | WZ811                                | CXCR4                                         |
| VX-765                               | CASP1               | HC-030031                            | TRPA1                                         |
| Ferrostatin-1 (Fer-1)                | VDAC                | Telmisartan                          | AGTR                                          |
| Rotundine                            | DRD1                | Cyproterone Acetate                  | AR                                            |
| MM-102                               | KANSL1              | Sodium 4-Aminosalicylate             | NFKB                                          |
| PF-3845                              | FAAH                | GSK1292263                           | GPR119                                        |
| OTX015                               | BRD2, BRD3, BRD4    | SGC 0946                             | DOT1L                                         |
| Ibrutinib (PCI-32765)                | BTK                 | LY2157299                            | TGFBR1                                        |
| 4E1RCat                              | EIF4E               | IPA-3                                | PAK1                                          |
| Tofacitinib (CP-690550, Tasocitinib) | JAK3                | Esomeprazole Sodium                  | ATP4A                                         |
| PHA-793887                           | CDK2, CDK5, CDK7    | Ozagrel                              | TBXA2R                                        |
| WZ811                                | CXCR4               | AZD4547                              | FGFR1, FGFR2, FGFR3                           |
| Allopurinol                          | HCRTR1, HCRTR2      | GNF-2                                | ABL1                                          |
| HC-030031                            | TRPA1               | TPCA-1                               | IKKBK                                         |
| Telmisartan                          | AGTR                | T0901317                             | NR1H3, NR1H2, NR1H4                           |
| Mozavaptan                           | AVPR1, AVPR2        | PYR-41                               | UBA1                                          |
| Cyproterone Acetate                  | AR                  | LDN-212854                           | ACVR1, ACVRL1                                 |
| Sodium 4-Aminosalicylate             | NFKB                | Ki16425                              | LPAR1, LPAR2, LPAR3                           |
| GSK1292263                           | GPR119              | Oxcarbazepine                        | SCN                                           |
| SGC 0946                             | DOT1L               | MRS 2578                             | P2RY6                                         |

|                                  |                            |                                  |                            |
|----------------------------------|----------------------------|----------------------------------|----------------------------|
| LY2157299                        | TGFR1                      | AGI-5198                         | IDH1                       |
| IPA-3                            | PAK1                       | BTB06584                         | ATP5A1                     |
| Esomeprazole Sodium              | ATP4A                      | Dalcetrapib (JTT-705, RO4607381) | CETP                       |
| DMH1                             | ACVR1                      | Iniparib (BSI-201)               | PARP1                      |
| Ozagrel                          | TBXA2R                     | Vildagliptin (LAF-237)           | DPP4                       |
| AZD4547                          | FGFR1, FGFR2, FGFR3        | Dynasore                         | DNM1, DNM2                 |
| GW9508                           | FFAR1, FFAR4               | Piceatannol                      | SYK                        |
| VE-821                           | ATR                        | Quizartinib (AC220)              | FLT3                       |
| NSC 405020                       | MMP14                      | Enzastaurin (LY317615)           | PRKCB, PRKCA, PRKCG, PRKCE |
| GNF-2                            | ABL1                       | Anastrozole                      | CYP19A1                    |
| TPCA-1                           | IKBKB                      | SB743921                         | 0                          |
| T0901317                         | NR1H3, NR1H2, NR1H4        | SN-38                            | TOP1                       |
| PD0325901                        | MAP2K1, MAP2K2             | Wnt-C59 (C59)                    | WNT3A                      |
| PYR-41                           | UBA1                       | BAM7                             | BAX                        |
| U0126-EtOH                       | MAP2K1, MAP2K2             | (+)-JQ1                          | BRD4                       |
| LDN-212854                       | ACVR1, ACVRL1              | KPT-185                          | XPO1                       |
| Ki16425                          | LPAR1, LPAR2, LPAR3        | OG-L002                          | KDM1A                      |
| C646                             | EP300                      | MK-1775                          | WEE1                       |
| Oxcarbazepine                    | SCN                        | AT101                            | BCL2, BCL2L1, MCL1         |
| Mdivi-1                          | DRP1, DNM1                 | BMS-707035                       | 0                          |
| MRS 2578                         | P2RY6                      | Ouabain                          | ATP1B                      |
| AGI-5198                         | IDH1                       | Fluvastatin Sodium               | HMGCR                      |
| LY2603618                        | CHEK1                      | Propranolol HCl                  | ADRB1                      |
| BTB06584                         | ATP5A1                     | KPT-276                          | XPO1                       |
| NPS-2143                         | CASR                       | KPT-330                          | XPO1                       |
| Veliparib (ABT-888)              | PARP1, PARP2               | Exemestane                       | CYP19A1                    |
| Dalcetrapib (JTT-705, RO4607381) | CETP                       | Palbociclib (PD-0332991) HCl     | CDK4, CDK6                 |
| Vandetanib (ZD6474)              | KDR                        | EHop-016                         | RAC1, RAC3                 |
| Istradefylline                   | ADORA2A                    | SGI-1776 free base               | PIM1, FLT3, GSG2           |
| Iniparib (BSI-201)               | PARP1                      | KX2-391                          | SRC                        |
| Dabrafenib (GSK2118436)          | BRAF (V600)                | Enzalutamide (MDV3100)           | AR                         |
| Finasteride                      | SRD5A2                     | PD184352 (CI-1040)               | MAP2K1, MAP2K2             |
| Tyrphostin AG 879                | ERBB2                      | OSI-906 (Linsitinib)             | IGFR1, INSR                |
| Cilomilast                       | PDE4                       | Methotrexate                     | DHFR                       |
| TAE226 (NVP-TAE226)              | PTK2, PTK2B                | Pralatrexate                     | DHFR                       |
| Ozagrel HCl                      | TBXAS1                     | Enalaprilat Dihydrate            | ACE                        |
| Vildagliptin (LAF-237)           | DPP4                       | Trichostatin A (TSA)             | ALL HDACS (Except HDAC8)   |
| Dynasore                         | DNM1, DNM2                 | WZ4003                           | NUAK1, NUAKE2              |
| Piceatannol                      | SYK                        | MLN2238                          | PSMC1                      |
| Quizartinib (AC220)              | FLT3                       | Ispinesib (SB-715992)            | 0                          |
| Tenovin-6                        | TP53, SIRT2, SIRT1, SIRT3  | SNS-314 Mesylate                 | AURKA, AURKB, AURKC        |
| Enzastaurin (LY317615)           | PRKCB, PRKCA, PRKCG, PRKCE | Irinotecan                       | TOP1                       |
| CGP 57380                        | MKNK1                      | Rigosertib (ON-01910)            | PLK1, PLK2                 |



|                       |                                 |                                 |                                                  |
|-----------------------|---------------------------------|---------------------------------|--------------------------------------------------|
| Bisoprolol fumarate   | ADRB1                           | Rolipram                        | PDE4                                             |
| Bosutinib (SKI-606)   | SRC, ABL1                       | Bupivacaine HCl                 | ADCY4                                            |
| S3I-201               | STAT3                           | UNC669                          | L3MBTL1                                          |
| HA14-1                | BCL2                            | Entacapone                      | COMT                                             |
| TG100-115             | PIK3CG, PIK3CD                  | AG-14361                        | PARP1                                            |
| ADL5859 HCl           | OPRK1, OPRM1                    | NLG919                          | IDO1                                             |
| Voriconazole          | CYP51A1                         | Levosulpiride                   | DRD2                                             |
| BIBR 1532             | TERT                            | Daunorubicin HCl                | TOP2                                             |
| Thiazovivin           | ROCK1, ROCK2                    | IMD 0354                        | IKKBK, CHUK                                      |
| Anastrozole           | CYP19A1                         | CRT0044876                      | APE1                                             |
| EUK 134               | SOD1                            | TCID                            | UCHL3                                            |
| Bergenin              | 0                               | LB42708                         | FNTA                                             |
| SN-38                 | TOP1                            | Bortezomib (PS-341)             | PSMC1                                            |
| CP-91149              | PYGL, PYGM, PYGB                | YM155<br>(Sepantronium Bromide) | BIRC5                                            |
| Wnt-C59 (C59)         | WNT3A                           | Agomelatine                     | HTR2C                                            |
| NU7026                | PRKDC                           | CEP-18770<br>(Delanzomib)       | PSMC1                                            |
| BAM7                  | BAX                             | Oligomycin A                    | ATPAF1                                           |
| ZM 306416             | FLT1                            | ICG-001                         | WNT                                              |
| (+)-JQ1               | BRD4                            | Stattic                         | STAT3                                            |
| GW9662                | PPARG                           | SC144                           | IL6ST                                            |
| KPT-185               | XPO1                            | Panobinostat<br>(LBH589)        | HDAC                                             |
| Pifithrin- $\mu$      | TP53, HSPBP1                    | VX-680 (Tozasertib,<br>MK-0457) | AURKA                                            |
| Batimastat (BB-94)    | MMP1, MMP2, MMP3,<br>MMP7, MMP9 | Birinapant                      | DIABLO (AP1)                                     |
| Sertraline HCl        | 0                               | Tadalafil                       | PDE5                                             |
| OG-L002               | KDM1A                           | GSK J4 HCl                      | KDM6A, KDM6B                                     |
| MK-1775               | WEE1                            | ZCL278                          | CDC42                                            |
| Costunolide           | TERT                            | Stavudine (d4T)                 | 0                                                |
| AT101                 | BCL2, BCL2L1, MCL1              | Mubritinib (TAK 165)            | ERBB2                                            |
| GSK690693             | AKT1, AKT2, AKT3                | AZ20                            | ATR                                              |
| Tropicamide           | CHRM4                           | NMS-873                         | VCP                                              |
| BMS-707035            | 0                               | NH125                           | EEF2K, PRKC, PRKA,<br>CAMK2, Histidine<br>Kinase |
| Raltegravir (MK-0518) | 0                               | BI 2536                         | PLK1, PLK2, PLK3                                 |
| EX 527 (Selisistat)   | SIRT1                           | GSK461364                       | PLK1, PLK2, PLK3                                 |
| CCT128930             | AKT2                            |                                 |                                                  |
| Pomalidomide          | TNF                             |                                 |                                                  |
| AS-252424             | PIK3CG                          |                                 |                                                  |
| Tie2 kinase inhibitor | TEK                             |                                 |                                                  |
| Ouabain               | ATP1B                           |                                 |                                                  |
| Ranitidine            | HRH2                            |                                 |                                                  |
| SKI II                | S1PR                            |                                 |                                                  |
| Fluvastatin Sodium    | HMGCR                           |                                 |                                                  |
| Propranolol HCl       | ADRB1                           |                                 |                                                  |
| Erastin               | VDAC                            |                                 |                                                  |

|                              |                              |  |
|------------------------------|------------------------------|--|
| Ifenprodil Tartrate          | GRIN                         |  |
| KPT-276                      | XPO1                         |  |
| AZD2461                      | PARP                         |  |
| KPT-330                      | XPO1                         |  |
| AGI-6780                     | IDH2                         |  |
| SGI-1027                     | DNMT1, DNMT3A,<br>DNMT3B     |  |
| Atglistatin                  | PNPLA2                       |  |
| Suvorexant (MK-4305)         | HCRTR1, HCRTR2               |  |
| SRT1720                      | SIRT1                        |  |
| 4EGI-1                       | EIF4E                        |  |
| Exemestane                   | CYP19A1                      |  |
| NSC 23766                    | RAC                          |  |
| 2-Methoxyestradiol (2-MeOE2) | HIF1A                        |  |
| Palbociclib (PD-0332991) HCl | CDK4, CDK6                   |  |
| EHop-016                     | RAC1, RAC3                   |  |
| PF-573228                    | PTK2                         |  |
| ABT-199 (GDC-0199)           | BCL2                         |  |
| Memantine HCl                | CYP2B6                       |  |
| PTC-209                      | BMI1                         |  |
| Trimebutine                  | OPRK1, OPRM1, OPRD1          |  |
| CK-636                       | ARPC2, ARPC3                 |  |
| SGI-1776 free base           | PIM1, FLT3, GSG2             |  |
| AZD7545                      | PDK1, PDK2                   |  |
| URB597                       | FAAH                         |  |
| GW0742                       | PPARD                        |  |
| TAK-875                      | FFAR1                        |  |
| Pacritinib (SB1518)          | JAK2, FLT3                   |  |
| KX2-391                      | SRC                          |  |
| PluriSIn #1 (NSC 14613)      | SCD                          |  |
| Crenolanib (CP-868596)       | PDGFRA, PDGFRB, FLT3 (D842V) |  |
| Enzalutamide (MDV3100)       | AR                           |  |
| PFI-1 (PF-6405761)           | BRD4                         |  |
| Dapagliflozin                | SLC5A2                       |  |
| Maraviroc                    | CCR5                         |  |
| Nebivolol                    | ADRB1                        |  |
| I-BET151 (GSK1210151A)       | BRD2, BRD3, BRD4             |  |
| VX-809 (Lumacaftor)          | CFTR                         |  |
| Apoptosis Activator 2        | CASP3                        |  |
| Naproxen                     | PTGS1, PTGS2                 |  |
| Bosentan Hydrate             | EDNRA, EDNRB                 |  |
| Acadesine                    | PRKAA1                       |  |
| E-64                         | CTSK                         |  |
| Captopril                    | ACE                          |  |
| Selumetinib (AZD6244)        | MAP2K1, MAPK3, MAPK1         |  |

|                                    |                                |  |
|------------------------------------|--------------------------------|--|
| Tolvaptan                          | AVPR2                          |  |
| PD184352 (CI-1040)                 | MAP2K1, MAP2K2                 |  |
| OSI-906 (Linsitinib)               | IGFR1, INSR                    |  |
| Canagliflozin                      | SLC5A2                         |  |
| CP-673451                          | PDGFRA, PDGFRB                 |  |
| Sirtinol                           | SIRT1, SIRT2                   |  |
| Methotrexate                       | DHFR                           |  |
| SAR131675                          | FLT4                           |  |
| Pralatrexate                       | DHFR                           |  |
| BML-190                            | CNR2                           |  |
| TWS119                             | GSK3B                          |  |
| IKK-16 (IKK Inhibitor VII)         | IKBKB, CHUK                    |  |
| Enalaprilat Dihydrate              | ACE                            |  |
| Triamterene                        | SCN                            |  |
| Clemastine Fumarate                | HRH1                           |  |
| Fingolimod (FTY720) HCl            | S1PR                           |  |
| Amlodipine                         | CACNA1C                        |  |
| PP2                                | SRC                            |  |
| CHIR-124                           | CHEK1                          |  |
| Temsirolimus (CCI-779, NSC 683864) | MTOR                           |  |
| YO-01027                           | APP, APPL1, NOTCH              |  |
| Trichostatin A (TSA)               | ALL HDACS (Except HDAC8)       |  |
| PAC-1                              | CASP3                          |  |
| PHA-665752                         | MET                            |  |
| VE-822                             | ATR                            |  |
| SB203580                           | MAPK11, MAPK12, MAPK13, MAPK14 |  |
| EPZ-6438                           | EZH2                           |  |
| KU-55933 (ATM Kinase Inhibitor)    | ATM                            |  |
| CGK 733                            | ATM, ATR                       |  |
| WZ4002                             | EGFR                           |  |
| WZ4003                             | NUAK1, NUAK2                   |  |
| TAK-700 (Orteronel)                | CYP17A1                        |  |
| Loxistatin Acid (E-64C)            | 0                              |  |
| Zibotentan (ZD4054)                | EDNRA                          |  |
| Pyrimethamine                      | DHFR                           |  |
| RKI-1447                           | ROCK1, ROCK2                   |  |
| UNC2250                            | MERTK                          |  |
| SMI-4a                             | PIM1                           |  |
| SB415286                           | GSK3A                          |  |
| PRT062607 (P505-15, BIIB057) HCl   | SYK                            |  |
| Torcetrapib                        | CETP                           |  |
| MK-2206 2HCl                       | AKT1, AKT2, AKT3               |  |
| ML130 (Nodinitib-1)                | NOD1                           |  |
| PF-04217903                        | MET                            |  |

|                                             |                                   |  |
|---------------------------------------------|-----------------------------------|--|
| GW441756                                    | NTRK1                             |  |
| Varespladib<br>(LY315920)                   | PLA2G2A                           |  |
| ML161                                       | PARP1                             |  |
| MK-2866 (GTx-024)                           | AR                                |  |
| Ticagrelor                                  | P2RY12                            |  |
| Letrozole                                   | CYP19A1                           |  |
| GW2580                                      | CSF1R                             |  |
| Zosuquidar<br>(LY335979) 3HCl               | ABCB1                             |  |
| KU-60019                                    | ATM                               |  |
| LY2228820                                   | MAPK11, MAPK12,<br>MAPK13, MAPK14 |  |
| MLN2238                                     | PSMC1                             |  |
| Org 27569                                   | CNR1                              |  |
| Oxymetazoline HCl                           | ADRA1A                            |  |
| DMXAA (Vadimezan)                           | NQ01                              |  |
| Anacetrapib (MK-0859)                       | CETP                              |  |
| AM1241                                      | CNR2                              |  |
| Embelin                                     | XIAP                              |  |
| Toremifene Citrate                          | ESR                               |  |
| GSK2656157                                  | EIF2AK3                           |  |
| Felodipine                                  | CACNA1C                           |  |
| (+)-Bicuculline                             | GABR, KCNMA1                      |  |
| Ticlopidine HCl                             | P2RY                              |  |
| SANT-1                                      | SMO                               |  |
| Ispinesib (SB-715992)                       | 0                                 |  |
| BTZ043 Racemate                             | 0                                 |  |
| AZD7762                                     | CHEK1, CHEK2                      |  |
| AVL-292                                     | BTK                               |  |
| Pimobendan                                  | PDE3                              |  |
| DBeQ                                        | VCP                               |  |
| Formoterol<br>Hemifumarate                  | ADRB2                             |  |
| CNX-774                                     | BTK                               |  |
| Lovastatin                                  | HMGCR                             |  |
| 4 $\mu$ 8C                                  | ERN1                              |  |
| Lafutidine                                  | HRH2                              |  |
| AZ191                                       | DYRK1B                            |  |
| (-)-Parthenolide                            | MDM2, P53                         |  |
| JSH-23                                      | NFKB                              |  |
| Pramipexole                                 | DRD2S, DRD2L, DRD3,<br>DRD4       |  |
| RepSox                                      | TGFBR1                            |  |
| Bazedoxifene HCl                            | ESR1, ESR2                        |  |
| Golgicide A                                 | GBF1                              |  |
| LDE225 (NVP-<br>LDE225, Erismodegib)        | SMO                               |  |
| Ridaforolimus<br>(Deforolimus, MK-<br>8669) | MTOR                              |  |

|                                                       |                                     |  |
|-------------------------------------------------------|-------------------------------------|--|
| LY2784544                                             | JAK2                                |  |
| SNS-314 Mesylate                                      | AURKA, AURKB, AURKC                 |  |
| BGJ398 (NVP-BGJ398)                                   | FGFR1, FGFR2, FGFR3                 |  |
| Irinotecan                                            | TOP1                                |  |
| OSI-420                                               | EGFR                                |  |
| Dutasteride                                           | SRD5A2, SRD5A1                      |  |
| Apigenin                                              | CYP2C9                              |  |
| Rigosertib (ON-01910)                                 | PLK1, PLK2                          |  |
| Forskolin                                             | ADCY4                               |  |
| Rolipram                                              | PDE4                                |  |
| Bupivacaine HCl                                       | ADCY4                               |  |
| UNC669                                                | L3MBTL1                             |  |
| Tioxolone                                             | CA1                                 |  |
| PF-4708671                                            | RPS6KB1                             |  |
| 5-hydroxymethyl Tolterodine (PNU 200577, 5-HMT, 5-HM) | CHRM1                               |  |
| XAV-939                                               | WNT                                 |  |
| SB742457                                              | HTR6                                |  |
| Cinacalcet HCl                                        | CASR                                |  |
| Linagliptin                                           | DPP4                                |  |
| Etomidate                                             | GABR                                |  |
| Entacapone                                            | COMT                                |  |
| AG-14361                                              | PARP1                               |  |
| Moclobemide (Ro 111163)                               | MAOA                                |  |
| LY411575                                              | APP, NOTCH                          |  |
| GDC-0152                                              | XIAP, BIRC7, AP1, AP2               |  |
| OC000459                                              | PTGDR2                              |  |
| NLG919                                                | IDO1                                |  |
| Levosulpiride                                         | DRD2                                |  |
| Imatinib (STI571)                                     | ABL1, KIT, PDGFR                    |  |
| DCC-2036 (Rebastinib)                                 | ABL1, SRC, LYN, FGR, HCK, KDR, FLT3 |  |
| XL335                                                 | NR1H4                               |  |
| Nilvadipine                                           | CACNA1C                             |  |
| CHIR-98014                                            | GSK3A, GSK3B                        |  |
| GW4064                                                | NR1H4                               |  |
| PF-5274857                                            | SMO                                 |  |
| GDC-0068                                              | AKT1, AKT2, AKT3                    |  |
| JNJ-1661010                                           | FAAH                                |  |
| VU 0364770                                            | GRM4                                |  |
| U-104                                                 | CA12                                |  |
| Daunorubicin HCl                                      | TOP2                                |  |
| PF-562271                                             | PTK2                                |  |
| AZD3463                                               | ALK, IGFR1                          |  |
| IOX2                                                  | EGLN1                               |  |
| IMD 0354                                              | IKBKB, CHUK                         |  |

|                                 |                                                                                      |  |
|---------------------------------|--------------------------------------------------------------------------------------|--|
| CRT0044876                      | APE1                                                                                 |  |
| TCID                            | UCHL3                                                                                |  |
| LB42708                         | FNTA                                                                                 |  |
| Necrostatin-1                   | RIPK1                                                                                |  |
| Empagliflozin (BI 10773)        | SLC5A2                                                                               |  |
| SU11274                         | MET                                                                                  |  |
| Bortezomib (PS-341)             | PSMC1                                                                                |  |
| YM155 (Sepantronium Bromide)    | BIRC5                                                                                |  |
| Lenalidomide (CC-5013)          | TNF                                                                                  |  |
| Ivacaftor (VX-770)              | CFTR                                                                                 |  |
| Agomelatine                     | HTR2C                                                                                |  |
| 17-AAG (Tanespimycin)           | HSP90                                                                                |  |
| SP600125                        | JKAMP, MAPK9, MAPK10; MAP2K4; MAP2K3, MAP2K6, AKT1, PRKC; MAPK1, MAPK14, CHEK1, EGFR |  |
| CEP-18770 (Delanzomib)          | PSMC1                                                                                |  |
| Aprepitant                      | TACR1                                                                                |  |
| Oligomycin A                    | ATPAF1                                                                               |  |
| Ginkgolide A                    | GABR                                                                                 |  |
| Stattic                         | STAT3                                                                                |  |
| SC144                           | IL6ST                                                                                |  |
| Panobinostat (LBH589)           | HDAC                                                                                 |  |
| VX-680 (Tozasertib, MK-0457)    | AURKA                                                                                |  |
| GDC-0941                        | PIK3CA, PIK3CD                                                                       |  |
| Everolimus (RAD001)             | MTOR                                                                                 |  |
| Rebamipide                      | CCKAR                                                                                |  |
| Rasagiline Mesylate             | MAOB                                                                                 |  |
| PD128907 HCl                    | DDR3                                                                                 |  |
| ADX-47273                       | GRM5                                                                                 |  |
| AP26113                         | ALK                                                                                  |  |
| Birinapant                      | DIABLO (AP1)                                                                         |  |
| LDK378                          | ALK                                                                                  |  |
| ZM 447439                       | AURKA, AURKB                                                                         |  |
| BX-912                          | PDK1                                                                                 |  |
| Elvitegravir (GS-9137, JTK-303) | 0                                                                                    |  |
| Fostatinib (R788)               | SYK                                                                                  |  |
| TCS 359                         | FLT3                                                                                 |  |
| Carvedilol                      | ADRB1                                                                                |  |
| Naftopidil                      | ADRA1A                                                                               |  |
| T0070907                        | PPARG                                                                                |  |
| Gliquidone                      | KCNJ                                                                                 |  |
| SC-514                          | IKBKB                                                                                |  |
| ZCL278                          | CDC42                                                                                |  |
| VU 0364439                      | GRM4                                                                                 |  |

|                                                       |                                            |  |
|-------------------------------------------------------|--------------------------------------------|--|
| SB431542                                              | TGFBR1                                     |  |
| Odanacatib (MK-0822)                                  | CTSK                                       |  |
| Celecoxib                                             | PTGS2                                      |  |
| Etodolac                                              | PTGS1                                      |  |
| VX-745                                                | MAPK14                                     |  |
| GSK429286A                                            | ROCK1, ROCK2                               |  |
| SB408124                                              | HCRTR1                                     |  |
| H 89 2HCI                                             | PRKAC                                      |  |
| Mubritinib (TAK 165)                                  | ERBB2                                      |  |
| BMS-378806                                            | CD4                                        |  |
| Ki16198                                               | LPAR1, LPAR3                               |  |
| AZ20                                                  | ATR                                        |  |
| AMG-517                                               | TRPV1                                      |  |
| NMS-873                                               | VCP                                        |  |
| Sorafenib                                             | RAF1, BRAF, KDR                            |  |
| NH125                                                 | EEF2K, PRKC, PRKA, CAMK2, Histidine Kinase |  |
| Sal003                                                | EIF2A                                      |  |
| Tariquidar                                            | ABCB1                                      |  |
| Lomeguatrib                                           | MGMT                                       |  |
| BI 2536                                               | PLK1, PLK2, PLK3                           |  |
| Imidapril HCl                                         | ACE                                        |  |
| Gliclazide                                            | KCNJ                                       |  |
| Sotrastaurin                                          | PRKC (especially PRKCQ; inactive to PRKCZ) |  |
| BI-D1870                                              | RPS6KA1, RPS6KA2, RPS6KA3, RPS6KA4         |  |
| Go 6983                                               | PRKCA, PRKCB, PRKCG, PRKCD                 |  |
| MNS (3,4-Methylenedioxy- $\beta$ -nitrostyrene, MDBN) | SYK, SRC, VCP                              |  |

**PD TX R06-T4**

| <b>RPMI</b>                   |                                                         | <b>SS</b>                            |                                                                                                                                              |
|-------------------------------|---------------------------------------------------------|--------------------------------------|----------------------------------------------------------------------------------------------------------------------------------------------|
| <b>402 compounds</b>          |                                                         | <b>269 compounds</b>                 |                                                                                                                                              |
| <b>Compound</b>               | <b>Target</b>                                           | <b>Compound</b>                      | <b>Target</b>                                                                                                                                |
| FG-4592                       | EPAS1, EPO                                              | Rizatriptan Benzoate                 | HTR1A                                                                                                                                        |
| Rizatriptan Benzoate          | HTR1A                                                   | Tolfenamic Acid                      | PTGS2                                                                                                                                        |
| Fulvestrant                   | ESR                                                     | Ramelteon                            | MTNR1A, MTNR1B                                                                                                                               |
| Tolfenamic Acid               | PTGS2                                                   | Belinostat (PXD101)                  | HDAC                                                                                                                                         |
| Ramelteon                     | MTNR1A, MTNR1B                                          | Rivaroxaban                          | F10                                                                                                                                          |
| Trospium chloride             | CHRM1                                                   | Rimonabant                           | CNR1                                                                                                                                         |
| Granisetron HCl               | HTR3A                                                   | FLI-06                               | NOTCH                                                                                                                                        |
| A-769662                      | PRKAA1                                                  | Sitaxentan sodium                    | EDNRA                                                                                                                                        |
| Losartan Potassium (DuP 753)  | AGTR                                                    | Brinzolamide                         | CA2                                                                                                                                          |
| Tolazoline HCl                | ADRA1A                                                  | Zebularine                           | DNMT1, DNMT3A, DNMT3B                                                                                                                        |
| Tenofovir Disoproxil Fumarate | 0                                                       | MLN8054                              | AURKA                                                                                                                                        |
| Ataluren (PTC124)             | CFTR                                                    | PR-619                               | ATXN7L3, BAP1, OTUB1, OTUD1, OTUD6A, OTUDB7A, UBB, UCHL3, USP1, USP2, USP4, USP5, USP7, USP8, USP14, USP15, USP17, USP26, USP30, USP36, YOD1 |
| Candesartan                   | AGTR                                                    | Naltrexone HCl                       | OPRK1, OPRM1, OPRD1                                                                                                                          |
| Belinostat (PXD101)           | HDAC                                                    | Ganetespib (STA-9090)                | HSP90                                                                                                                                        |
| Semagacestat (LY450139)       | APP, NOTCH                                              | Vemurafenib (PLX4032, RG7204)        | BRAF (V600E)                                                                                                                                 |
| NVP-ADW742                    | IGFR1                                                   | Pancuronium dibromide                | 0                                                                                                                                            |
| NSC 319726                    | TP53 (R175)                                             | Loratadine                           | HRH1                                                                                                                                         |
| Icotinib                      | EGFR                                                    | PNU-120596                           | 0                                                                                                                                            |
| Ilomastat (GM6001, Galardin)  | MMP1, MMP2, MMP3, MMP7, MMP8, MMP9, MMP12, MMP14, MMP26 | GW3965 HCl                           | NR1H3, NR1H2                                                                                                                                 |
| Rivaroxaban                   | F10                                                     | AZD6482                              | PIK3CB                                                                                                                                       |
| STF-118804                    | NAMPT                                                   | SB705498                             | TRPV1                                                                                                                                        |
| Rimonabant                    | CNR1                                                    | Safinamide Mesylate                  | MAOB, MAOA                                                                                                                                   |
| FLI-06                        | NOTCH                                                   | Tenofovir                            | 0                                                                                                                                            |
| Sitaxentan sodium             | EDNRA                                                   | Apixaban                             | F10                                                                                                                                          |
| ABT-263 (Navitoclax)          | BCL2, BCL2L1, BCL2L2                                    | ML347                                | ACVR1, ACVRL1                                                                                                                                |
| Brinzolamide                  | CA2                                                     | Ferrostatin-1 (Fer-1)                | VDAC                                                                                                                                         |
| Nilotinib (AMN-107)           | ABL1                                                    | Rotundine                            | DRD1                                                                                                                                         |
| Tranylcypromine (2-PCPA) HCl  | MAO, CYP2A6                                             | MM-102                               | KANSL1                                                                                                                                       |
| Tandutinib (MLN518)           | FLT3, PDGFR KIT                                         | OTX015                               | BRD2, BRD3, BRD4                                                                                                                             |
| Zebularine                    | DNMT1, DNMT3A, DNMT3B                                   | Tofacitinib (CP-690550, Tasocitinib) | JAK3                                                                                                                                         |



|                                      |                                                                                                                                              |                                  |                     |
|--------------------------------------|----------------------------------------------------------------------------------------------------------------------------------------------|----------------------------------|---------------------|
| MLN8054                              | AURKA                                                                                                                                        | PHA-793887                       | CDK2, CDK5, CDK7    |
| PR-619                               | ATXN7L3, BAP1, OTUB1, OTUD1, OTUD6A, OTUDB7A, UBB, UCHL3, USP1, USP2, USP4, USP5, USP7, USP8, USP14, USP15, USP17, USP26, USP30, USP36, YOD1 | Allopurinol                      | HCRTR1, HCRTR2      |
| Roxatidine Acetate HCl               | HRH2                                                                                                                                         | HC-030031                        | TRPA1               |
| GSK1904529A                          | IGFR1, INSR                                                                                                                                  | Telmisartan                      | AGTR                |
| Atorvastatin Calcium                 | HMGCR                                                                                                                                        | Cyproterone Acetate              | AR                  |
| SNS-032 (BMS-387032)                 | CDK2                                                                                                                                         | Sodium 4-Aminosalicylate         | NFKB                |
| Naltrexone HCl                       | OPRK1, OPRM1, OPRD1                                                                                                                          | GSK1292263                       | GPR119              |
| Ganetespib (STA-9090)                | HSP90                                                                                                                                        | SGC 0946                         | DOT1L               |
| CGS 21680 HCl                        | ADORA2A                                                                                                                                      | LY2157299                        | TGFBR1              |
| Vemurafenib (PLX4032, RG7204)        | BRAF (V600E)                                                                                                                                 | IPA-3                            | PAK1                |
| Pancuronium dibromide                | 0                                                                                                                                            | Esomeprazole Sodium              | ATP4A               |
| Loratadine                           | HRH1                                                                                                                                         | DMH1                             | ACVR1               |
| PNU-120596                           | 0                                                                                                                                            | Ozagrel                          | TBXA2R              |
| Ruxolitinib (INCB018424)             | JAK1, JAK2                                                                                                                                   | GW9508                           | FFAR1, FFAR4        |
| GW3965 HCl                           | NR1H3, NR1H2                                                                                                                                 | NSC 405020                       | MMP14               |
| AZD6482                              | PIK3CB                                                                                                                                       | TPCA-1                           | IKBKB               |
| SB705498                             | TRPV1                                                                                                                                        | PYR-41                           | UBA1                |
| Safinamide Mesylate                  | MAOB, MAOA                                                                                                                                   | U0126-EtOH                       | MAP2K1, MAP2K2      |
| Tenofovir                            | 0                                                                                                                                            | LDN-212854                       | ACVR1, ACVRL1       |
| P22077                               | USP7, USP47                                                                                                                                  | Ki16425                          | LPAR1, LPAR2, LPAR3 |
| Aloxistatin                          | 0                                                                                                                                            | Mdivi-1                          | DRP1, DNM1          |
| NSC697923                            | UBE2                                                                                                                                         | MRS 2578                         | P2RY6               |
| Apixaban                             | F10                                                                                                                                          | LY2603618                        | CHEK1               |
| ML347                                | ACVR1, ACVRL1                                                                                                                                | BTB06584                         | ATP5A1              |
| Irinotecan HCl Trihydrate            | TOP1                                                                                                                                         | NPS-2143                         | CASR                |
| SSR128129E                           | FGFR1                                                                                                                                        | Veliparib (ABT-888)              | PARP1, PARP2        |
| VX-765                               | CASP1                                                                                                                                        | Dalcetrapib (JTT-705, RO4607381) | CETP                |
| Ferrostatin-1 (Fer-1)                | VDAC                                                                                                                                         | Istradefylline                   | ADORA2A             |
| Rotundine                            | DRD1                                                                                                                                         | Iniparib (BSI-201)               | PARP1               |
| MM-102                               | KANSL1                                                                                                                                       | Dabrafenib (GSK2118436)          | BRAF (V600)         |
| PF-3845                              | FAAH                                                                                                                                         | Tyrphostin AG 879                | ERBB2               |
| OTX015                               | BRD2, BRD3, BRD4                                                                                                                             | Cilomilast                       | PDE4                |
| Ibrutinib (PCI-32765)                | BTK                                                                                                                                          | TAE226 (NVP-TAE226)              | PTK2, PTK2B         |
| 4E1RCat                              | EIF4E                                                                                                                                        | Vildagliptin (LAF-237)           | DPP4                |
| Tofacitinib (CP-690550, Tasocitinib) | JAK3                                                                                                                                         | Dynasore                         | DNM1, DNM2          |
| PHA-793887                           | CDK2, CDK5, CDK7                                                                                                                             | Piceatannol                      | SYK                 |

|                                  |                     |                        |                              |
|----------------------------------|---------------------|------------------------|------------------------------|
| WZ811                            | CXCR4               | Quizartinib (AC220)    | FLT3                         |
| Allopurinol                      | HCRTR1, HCRTR2      | Enzastaurin (LY317615) | PRKCB, PRKCA, PRKCG, PRKCE   |
| HC-030031                        | TRPA1               | HA14-1                 | BCL2                         |
| Telmisartan                      | AGTR                | TG100-115              | PIK3CG, PIK3CD               |
| Mozavaptan                       | AVPR1, AVPR2        | BIBR 1532              | TERT                         |
| Cyproterone Acetate              | AR                  | Anastrozole            | CYP19A1                      |
| Sodium 4-Aminosalicylate         | NFKB                | SB743921               | 0                            |
| GSK1292263                       | GPR119              | EUK 134                | SOD1                         |
| SGC 0946                         | DOT1L               | Bergenin               | 0                            |
| LY2157299                        | TGFBR1              | CP-91149               | PYGL, PYGM, PYGB             |
| IPA-3                            | PAK1                | Wnt-C59 (C59)          | WNT3A                        |
| Esomeprazole Sodium              | ATP4A               | NU7026                 | PRKDC                        |
| DMH1                             | ACVR1               | BAM7                   | BAX                          |
| Ozagrel                          | TBXA2R              | (+)-JQ1                | BRD4                         |
| AZD4547                          | FGFR1, FGFR2, FGFR3 | GW9662                 | PPARG                        |
| GW9508                           | FFAR1, FFAR4        | KPT-185                | XPO1                         |
| VE-821                           | ATR                 | Pifithrin- $\mu$       | TP53, HSPBP1                 |
| NSC 405020                       | MMP14               | Batimastat (BB-94)     | MMP1, MMP2, MMP3, MMP7, MMP9 |
| GNF-2                            | ABL1                | Sertraline HCl         | 0                            |
| TPCA-1                           | IKBKB               | OG-L002                | KDM1A                        |
| T0901317                         | NR1H3, NR1H2, NR1H4 | MK-1775                | WEE1                         |
| PD0325901                        | MAP2K1, MAP2K2      | AT101                  | BCL2, BCL2L1, MCL1           |
| PYR-41                           | UBA1                | Tropicamide            | CHRM4                        |
| U0126-EtOH                       | MAP2K1, MAP2K2      | BMS-707035             | 0                            |
| LDN-212854                       | ACVR1, ACVRL1       | Raltegravir (MK-0518)  | 0                            |
| Ki16425                          | LPAR1, LPAR2, LPAR3 | AS-252424              | PIK3CG                       |
| C646                             | EP300               | Tie2 kinase inhibitor  | TEK                          |
| Oxcarbazepine                    | SCN                 | Ouabain                | ATP1B                        |
| Mdivi-1                          | DRP1, DNMI          | Ranitidine             | HRH2                         |
| MRS 2578                         | P2RY6               | Fluvastatin Sodium     | HMGCR                        |
| AGI-5198                         | IDH1                | Propranolol HCl        | ADRB1                        |
| LY2603618                        | CHEK1               | Erastin                | VDAC                         |
| BTB06584                         | ATP5A1              | Ifenprodil Tartrate    | GRIN                         |
| NPS-2143                         | CASR                | KPT-276                | XPO1                         |
| Veliparib (ABT-888)              | PARP1, PARP2        | AZD2461                | PARP                         |
| Dalcetrapib (JTT-705, RO4607381) | CETP                | KPT-330                | XPO1                         |
| Vandetanib (ZD6474)              | KDR                 | AGI-6780               | IDH2                         |
| Istradefylline                   | ADORA2A             | SGI-1027               | DNMT1, DNMT3A, DNMT3B        |
| Iniparib (BSI-201)               | PARP1               | Atglistatin            | PNPLA2                       |

|                         |                              |                                    |                              |
|-------------------------|------------------------------|------------------------------------|------------------------------|
| Dabrafenib (GSK2118436) | BRAF (V600)                  | Suvorexant (MK-4305)               | HCRTR1, HCRTR2               |
| Finasteride             | SRD5A2                       | SRT1720                            | SIRT1                        |
| Tyrphostin AG 879       | ERBB2                        | Exemestane                         | CYP19A1                      |
| Cilomilast              | PDE4                         | NSC 23766                          | RAC                          |
| TAE226 (NVP-TAE226)     | PTK2, PTK2B                  | EHop-016                           | RAC1, RAC3                   |
| Ozagrel HCl             | TBXAS1                       | PF-573228                          | PTK2                         |
| Vildagliptin (LAF-237)  | DPP4                         | ABT-199 (GDC-0199)                 | BCL2                         |
| Dynasore                | DNM1, DNM2                   | Memantine HCl                      | CYP2B6                       |
| Piceatannol             | SYK                          | Trimebutine                        | OPRK1, OPRM1, OPRD1          |
| Quizartinib (AC220)     | FLT3                         | AZD7545                            | PKD1, PKD2                   |
| Tenovin-6               | TP53, SIRT2, SIRT1, SIRT3    | URB597                             | FAAH                         |
| Enzastaurin (LY317615)  | PRKCB, PRKCA, PRKCG, PRKCE   | GW0742                             | PPARD                        |
| CGP 57380               | MKNK1                        | Pacritinib (SB1518)                | JAK2, FLT3                   |
| Bisoprolol fumarate     | ADRB1                        | KX2-391                            | SRC                          |
| Bosutinib (SKI-606)     | SRC, ABL1                    | Crenolanib (CP-868596)             | PDGFRA, PDGFRB, FLT3 (D842V) |
| S3I-201                 | STAT3                        | PFI-1 (PF-6405761)                 | BRD4                         |
| HA14-1                  | BCL2                         | Dapagliflozin                      | SLC5A2                       |
| TG100-115               | PIK3CG, PIK3CD               | Maraviroc                          | CCR5                         |
| ADL5859 HCl             | OPRK1, OPRM1                 | Nebivolol                          | ADRB1                        |
| Voriconazole            | CYP51A1                      | E-64                               | CTSK                         |
| BIBR 1532               | TERT                         | OSI-906 (Linsitinib)               | IGFR1, INSR                  |
| Thiazovivin             | ROCK1, ROCK2                 | Canagliflozin                      | SLC5A2                       |
| Anastrozole             | CYP19A1                      | Sirtinol                           | SIRT1, SIRT2                 |
| SB743921                | 0                            | Methotrexate                       | DHFR                         |
| EUK 134                 | SOD1                         | SAR131675                          | FLT4                         |
| Bergenin                | 0                            | Pralatrexate                       | DHFR                         |
| SN-38                   | TOP1                         | TWS119                             | GSK3B                        |
| CP-91149                | PYGL, PYGM, PYGB             | IKK-16 (IKK Inhibitor VII)         | IKKB, CHUK                   |
| Wnt-C59 (C59)           | WNT3A                        | Enalaprilat Dihydrate              | ACE                          |
| NU7026                  | PRKDC                        | Triamterene                        | SCN                          |
| BAM7                    | BAX                          | Clemastine Fumarate                | HRH1                         |
| ZM 306416               | FLT1                         | Fingolimod (FTY720) HCl            | S1PR                         |
| (+)-JQ1                 | BRD4                         | PP2                                | SRC                          |
| GW9662                  | PPARG                        | CHIR-124                           | CHEK1                        |
| KPT-185                 | XPO1                         | Temsirolimus (CCI-779, NSC 683864) | MTOR                         |
| Pifithrin- $\mu$        | TP53, HSPBP1                 | Trichostatin A (TSA)               | ALL HDACS (Except HDAC8)     |
| Batimastat (BB-94)      | MMP1, MMP2, MMP3, MMP7, MMP9 | PHA-665752                         | MET                          |
| Sertraline HCl          | 0                            | CGK 733                            | ATM, ATR                     |
| OG-L002                 | KDM1A                        | WZ4002                             | EGFR                         |

|                              |                       |                                  |                                |
|------------------------------|-----------------------|----------------------------------|--------------------------------|
| MK-1775                      | WEE1                  | TAK-700 (Orteronel)              | CYP17A1                        |
| Costunolide                  | TERT                  | Loxistatin Acid (E-64C)          | 0                              |
| AT101                        | BCL2, BCL2L1, MCL1    | Zibotentan (ZD4054)              | EDNRA                          |
| GSK690693                    | AKT1, AKT2, AKT3      | Pyrimethamine                    | DHFR                           |
| Tropicamide                  | CHRM4                 | RKI-1447                         | ROCK1, ROCK2                   |
| BMS-707035                   | 0                     | SMI-4a                           | PIM1                           |
| Raltegravir (MK-0518)        | 0                     | SB415286                         | GSK3A                          |
| EX 527 (Selisistat)          | SIRT1                 | Torcetrapib                      | CETP                           |
| CCT128930                    | AKT2                  | MK-2206 2HCl                     | AKT1, AKT2, AKT3               |
| Pomalidomide                 | TNF                   | PF-04217903                      | MET                            |
| AS-252424                    | PIK3CG                | GW441756                         | NTRK1                          |
| Tie2 kinase inhibitor        | TEK                   | Varespladib (LY315920)           | PLA2G2A                        |
| Ouabain                      | ATP1B                 | Ticagrelor                       | P2RY12                         |
| Ranitidine                   | HRH2                  | Letrozole                        | CYP19A1                        |
| SKI II                       | S1PR                  | GW2580                           | CSF1R                          |
| Fluvastatin Sodium           | HMGCR                 | Zosuquidar (LY335979) 3HCl       | ABCB1                          |
| Propranolol HCl              | ADRB1                 | KU-60019                         | ATM                            |
| Erastin                      | VDAC                  | LY2228820                        | MAPK11, MAPK12, MAPK13, MAPK14 |
| Ifenprodil Tartrate          | GRIN                  | Oxymetazoline HCl                | ADRA1A                         |
| KPT-276                      | XPO1                  | DMXAA (Vadimezan)                | NQ01                           |
| AZD2461                      | PARP                  | Embelin                          | XIAP                           |
| KPT-330                      | XPO1                  | Toremifene Citrate               | ESR                            |
| AGI-6780                     | IDH2                  | GSK2656157                       | EIF2AK3                        |
| SGI-1027                     | DNMT1, DNMT3A, DNMT3B | Ticlopidine HCl                  | P2RY                           |
| Atglistatin                  | PNPLA2                | SANT-1                           | SMO                            |
| Suvorexant (MK-4305)         | HCRTR1, HCRTR2        | Ispinesib (SB-715992)            | 0                              |
| SRT1720                      | SIRT1                 | BTZ043 Racemate                  | 0                              |
| 4EGI-1                       | EIF4E                 | AZD7762                          | CHEK1, CHEK2                   |
| Exemestane                   | CYP19A1               | AVL-292                          | BTK                            |
| NSC 23766                    | RAC                   | Pimobendan                       | PDE3                           |
| 2-Methoxyestradiol (2-MeOE2) | HIF1A                 | DBeQ                             | VCP                            |
| Palbociclib (PD-0332991) HCl | CDK4, CDK6            | Formoterol Hemifumarate          | ADRB2                          |
| EHop-016                     | RAC1, RAC3            | Lovastatin                       | HMGCR                          |
| PF-573228                    | PTK2                  | Pramipexole                      | DRD2S, DRD2L, DRD3, DRD4       |
| ABT-199 (GDC-0199)           | BCL2                  | RepSox                           | TGFBR1                         |
| Memantine HCl                | CYP2B6                | Bazedoxifene HCl                 | ESR1, ESR2                     |
| PTC-209                      | BMI1                  | Golgicide A                      | GBF1                           |
| Trimebutine                  | OPRK1, OPRM1, OPRD1   | LDE225 (NVP-LDE225, Erismodegib) | SMO                            |

|                            |                              |                                                       |                                     |
|----------------------------|------------------------------|-------------------------------------------------------|-------------------------------------|
| CK-636                     | ARPC2, ARPC3                 | Ridaforolimus (Deforolimus, MK-8669)                  | MTOR                                |
| SGI-1776 free base         | PIM1, FLT3, GSG2             | LY2784544                                             | JAK2                                |
| AZD7545                    | PDK1, PDK2                   | SNS-314 Mesylate                                      | AURKA, AURKB, AURKC                 |
| URB597                     | FAAH                         | Irinotecan                                            | TOP1                                |
| GW0742                     | PPARD                        | Dutasteride                                           | SRD5A2, SRD5A1                      |
| TAK-875                    | FFAR1                        | Apigenin                                              | CYP2C9                              |
| Pacritinib (SB1518)        | JAK2, FLT3                   | Forskolin                                             | ADCY4                               |
| KX2-391                    | SRC                          | Rolipram                                              | PDE4                                |
| PluriSIn #1 (NSC 14613)    | SCD                          | Bupivacaine HCl                                       | ADCY4                               |
| Crenolanib (CP-868596)     | PDGFRA, PDGFRB, FLT3 (D842V) | UNC669                                                | L3MBTL1                             |
| Enzalutamide (MDV3100)     | AR                           | Tioxolone                                             | CA1                                 |
| PFI-1 (PF-6405761)         | BRD4                         | PF-4708671                                            | RPS6KB1                             |
| Dapagliflozin              | SLC5A2                       | 5-hydroxymethyl Tolterodine (PNU 200577, 5-HMT, 5-HM) | CHRM1                               |
| Maraviroc                  | CCR5                         | XAV-939                                               | WNT                                 |
| Nebivolol                  | ADRB1                        | SB742457                                              | HTR6                                |
| I-BET151 (GSK1210151A)     | BRD2, BRD3, BRD4             | Cinacalcet HCl                                        | CASR                                |
| VX-809 (Lumacaftor)        | CFTR                         | Linagliptin                                           | DPP4                                |
| Apoptosis Activator 2      | CASP3                        | Etomidate                                             | GABR                                |
| Naproxen                   | PTGS1, PTGS2                 | Entacapone                                            | COMT                                |
| Bosentan Hydrate           | EDNRA, EDNRB                 | LY411575                                              | APP, NOTCH                          |
| Acadesine                  | PRKAA1                       | OC000459                                              | PTGDR2                              |
| E-64                       | CTSK                         | NLG919                                                | IDO1                                |
| Captopril                  | ACE                          | Levosulpiride                                         | DRD2                                |
| Selumetinib (AZD6244)      | MAP2K1, MAPK3, MAPK1         | Imatinib (STI571)                                     | ABL1, KIT, PDGFR                    |
| Tolvaptan                  | AVPR2                        | DCC-2036 (Rebastinib)                                 | ABL1, SRC, LYN, FGR, HCK, KDR, FLT3 |
| PD184352 (CI-1040)         | MAP2K1, MAP2K2               | XL335                                                 | NR1H4                               |
| OSI-906 (Linsitinib)       | IGFR1, INSR                  | Nilvadipine                                           | CACNA1C                             |
| Canagliflozin              | SLC5A2                       | CHIR-98014                                            | GSK3A, GSK3B                        |
| CP-673451                  | PDGFRA, PDGFRB               | GW4064                                                | NR1H4                               |
| Sirtinol                   | SIRT1, SIRT2                 | PF-5274857                                            | SMO                                 |
| Methotrexate               | DHFR                         | GDC-0068                                              | AKT1, AKT2, AKT3                    |
| SAR131675                  | FLT4                         | VU 0364770                                            | GRM4                                |
| Pralatrexate               | DHFR                         | Daunorubicin HCl                                      | TOP2                                |
| BML-190                    | CNR2                         | PF-562271                                             | PTK2                                |
| TWS119                     | GSK3B                        | AZD3463                                               | ALK, IGFR1                          |
| IKK-16 (IKK Inhibitor VII) | IKKBK, CHUK                  | IOX2                                                  | EGLN1                               |
| Enalaprilat Dihydrate      | ACE                          | IMD 0354                                              | IKKBK, CHUK                         |

|                                    |                                |                              |                                                                                      |
|------------------------------------|--------------------------------|------------------------------|--------------------------------------------------------------------------------------|
| Triamterene                        | SCN                            | CRT0044876                   | APE1                                                                                 |
| Clemastine Fumarate                | HRH1                           | TCID                         | UCLH3                                                                                |
| Fingolimod (FTY720) HCl            | S1PR                           | Necrostatin-1                | RIPK1                                                                                |
| Amlodipine                         | CACNA1C                        | Empagliflozin (BI 10773)     | SLC5A2                                                                               |
| PP2                                | SRC                            | SU11274                      | MET                                                                                  |
| CHIR-124                           | CHEK1                          | Bortezomib (PS-341)          | PSMC1                                                                                |
| Temsirolimus (CCI-779, NSC 683864) | MTOR                           | YM155 (Sepantronium Bromide) | BIRC5                                                                                |
| YO-01027                           | APP, APPL1, NOTCH              | Lenalidomide (CC-5013)       | TNF                                                                                  |
| Trichostatin A (TSA)               | ALL HDACS (Except HDAC8)       | AUY922 (NVP-AUY922)          | HSP90A, HSP90B                                                                       |
| PAC-1                              | CASP3                          | Agomelatine                  | HTR2C                                                                                |
| PHA-665752                         | MET                            | 17-AAG (Tanespimycin)        | HSP90                                                                                |
| VE-822                             | ATR                            | SP600125                     | JKAMP, MAPK9, MAPK10; MAP2K4; MAP2K3, MAP2K6, AKT1, PRKC; MAPK1, MAPK14, CHEK1, EGFR |
| SB203580                           | MAPK11, MAPK12, MAPK13, MAPK14 | CEP-18770 (Delanzomib)       | PSMC1                                                                                |
| EPZ-6438                           | EZH2                           | Aprepitant                   | TACR1                                                                                |
| KU-55933 (ATM Kinase Inhibitor)    | ATM                            | Fluvoxamine maleate          | 0                                                                                    |
| CGK 733                            | ATM, ATR                       | Oligomycin A                 | ATPAF1                                                                               |
| WZ4002                             | EGFR                           | Ginkgolide A                 | GABR                                                                                 |
| WZ4003                             | NUAK1, NUAK2                   | Cryptotanshinone             | STAT3                                                                                |
| TAK-700 (Orteronel)                | CYP17A1                        | ICG-001                      | WNT                                                                                  |
| Loxistatin Acid (E-64C)            | 0                              | SC144                        | IL6ST                                                                                |
| Zibotentan (ZD4054)                | EDNRA                          | SRPIN340                     | SRPK1                                                                                |
| Pyrimethamine                      | DHFR                           | Panobinostat (LBH589)        | HDAC                                                                                 |
| RKI-1447                           | ROCK1, ROCK2                   | VX-680 (Tozasertib, MK-0457) | AURKA                                                                                |
| UNC2250                            | MERTK                          | Everolimus (RAD001)          | MTOR                                                                                 |
| SMI-4a                             | PIM1                           | MK-8245                      | SCD                                                                                  |
| SB415286                           | GSK3A                          | Aniracetam                   | GRIA1,                                                                               |
| PRT062607 (P505-15, BIIB057) HCl   | SYK                            | PD128907 HCl                 | DDR3                                                                                 |
| Torcetrapib                        | CETP                           | AP26113                      | ALK                                                                                  |
| MK-2206 2HCl                       | AKT1, AKT2, AKT3               | Birinapant                   | DIABLO (AP1)                                                                         |
| ML130 (Nodinitib-1)                | NOD1                           | BX-912                       | PDK1                                                                                 |
| PF-04217903                        | MET                            | Tadalafil                    | PDE5                                                                                 |
| GW441756                           | NTRK1                          | Fostamatinib (R788)          | SYK                                                                                  |
| Varespladib (LY315920)             | PLA2G2A                        | GSK J4 HCl                   | KDM6A, KDM6B                                                                         |
| ML161                              | PARP1                          | Carvedilol                   | ADRB1                                                                                |
| MK-2866 (GTx-024)                  | AR                             | SC-514                       | IKBKB                                                                                |

|                                         |                                   |                      |                                                  |
|-----------------------------------------|-----------------------------------|----------------------|--------------------------------------------------|
| Ticagrelor                              | P2RY12                            | ZCL278               | CDC42                                            |
| Letrozole                               | CYP19A1                           | Isotretinoin         | 0                                                |
| GW2580                                  | CSF1R                             | VX-745               | MAPK14                                           |
| Zosuquidar<br>(LY335979) 3HCl           | ABCB1                             | GSK429286A           | ROCK1, ROCK2                                     |
| KU-60019                                | ATM                               | Mubritinib (TAK 165) | ERBB2                                            |
| LY2228820                               | MAPK11, MAPK12, MAPK13,<br>MAPK14 | BMS-378806           | CD4                                              |
| MLN2238                                 | PSMC1                             | Ki16198              | LPAR1, LPAR3                                     |
| Org 27569                               | CNR1                              | AZ20                 | ATR                                              |
| Oxymetazoline HCl                       | ADRA1A                            | AMG-517              | TRPV1                                            |
| DMXAA<br>(Vadimezan)                    | NQ01                              | NMS-873              | VCP                                              |
| Anacetrapib (MK-<br>0859)               | CETP                              | Sorafenib            | RAF1, BRAF, KDR                                  |
| AM1241                                  | CNR2                              | NH125                | EEF2K, PRKC,<br>PRKA, CAMK2,<br>Histidine Kinase |
| Embelin                                 | XIAP                              | BI 2536              | PLK1, PLK2, PLK3                                 |
| Toremifene Citrate                      | ESR                               | GSK461364            | PLK1, PLK2, PLK3                                 |
| GSK2656157                              | EIF2AK3                           | BI-D1870             | RPS6KA1, RPS6KA2,<br>RPS6KA3, RPS6KA4            |
| Felodipine                              | CACNA1C                           |                      |                                                  |
| (+)-Bicuculline                         | GABR, KCNMA1                      |                      |                                                  |
| Ticlopidine HCl                         | P2RY                              |                      |                                                  |
| SANT-1                                  | SMO                               |                      |                                                  |
| Ispinesib (SB-<br>715992)               | 0                                 |                      |                                                  |
| BTZ043 Racemate                         | 0                                 |                      |                                                  |
| AZD7762                                 | CHEK1, CHEK2                      |                      |                                                  |
| AVL-292                                 | BTK                               |                      |                                                  |
| Pimobendan                              | PDE3                              |                      |                                                  |
| DBeQ                                    | VCP                               |                      |                                                  |
| Formoterol<br>Hemifumarate              | ADRB2                             |                      |                                                  |
| CNX-774                                 | BTK                               |                      |                                                  |
| Lovastatin                              | HMGCR                             |                      |                                                  |
| 4 $\mu$ 8C                              | ERN1                              |                      |                                                  |
| Lafutidine                              | HRH2                              |                      |                                                  |
| AZ191                                   | DYRK1B                            |                      |                                                  |
| (-)-Parthenolide                        | MDM2, P53                         |                      |                                                  |
| JSH-23                                  | NFKB                              |                      |                                                  |
| Pramipexole                             | DRD2S,DRD2L, DRD3, DRD4           |                      |                                                  |
| RepSox                                  | TGFBR1                            |                      |                                                  |
| Bazedoxifene HCl                        | ESR1, ESR2                        |                      |                                                  |
| Golgicide A                             | GBF1                              |                      |                                                  |
| LDE225 (NVP-<br>LDE225,Erismodegib<br>) | SMO                               |                      |                                                  |

|                                                       |                                     |  |
|-------------------------------------------------------|-------------------------------------|--|
| Ridaforolimus (Deforolimus, MK-8669)                  | MTOR                                |  |
| LY2784544                                             | JAK2                                |  |
| SNS-314 Mesylate                                      | AURKA, AURKB, AURKC                 |  |
| BGJ398 (NVP-BGJ398)                                   | FGFR1, FGFR2, FGFR3                 |  |
| Irinotecan                                            | TOP1                                |  |
| OSI-420                                               | EGFR                                |  |
| Dutasteride                                           | SRD5A2, SRD5A1                      |  |
| Apigenin                                              | CYP2C9                              |  |
| Rigosertib (ON-01910)                                 | PLK1, PLK2                          |  |
| Forskolin                                             | ADCY4                               |  |
| Rolipram                                              | PDE4                                |  |
| Bupivacaine HCl                                       | ADCY4                               |  |
| UNC669                                                | L3MBTL1                             |  |
| Tioxolone                                             | CA1                                 |  |
| PF-4708671                                            | RPS6KB1                             |  |
| 5-hydroxymethyl Tolterodine (PNU 200577, 5-HMT, 5-HM) | CHRM1                               |  |
| XAV-939                                               | WNT                                 |  |
| SB742457                                              | HTR6                                |  |
| Cinacalcet HCl                                        | CASR                                |  |
| Linagliptin                                           | DPP4                                |  |
| Etomidate                                             | GABR                                |  |
| Entacapone                                            | COMT                                |  |
| AG-14361                                              | PARP1                               |  |
| Moclobemide (Ro 111163)                               | MAOA                                |  |
| LY411575                                              | APP, NOTCH                          |  |
| GDC-0152                                              | XIAP, BIRC7, AP1, AP2               |  |
| OC000459                                              | PTGDR2                              |  |
| NLG919                                                | IDO1                                |  |
| Levosulpiride                                         | DRD2                                |  |
| Imatinib (STI571)                                     | ABL1, KIT, PDGFR                    |  |
| DCC-2036 (Rebastinib)                                 | ABL1, SRC, LYN, FGR, HCK, KDR, FLT3 |  |
| XL335                                                 | NR1H4                               |  |
| Nilvadipine                                           | CACNA1C                             |  |
| CHIR-98014                                            | GSK3A, GSK3B                        |  |
| GW4064                                                | NR1H4                               |  |
| PF-5274857                                            | SMO                                 |  |
| GDC-0068                                              | AKT1, AKT2, AKT3                    |  |
| JNJ-1661010                                           | FAAH                                |  |



|                              |                                                                                                                     |  |
|------------------------------|---------------------------------------------------------------------------------------------------------------------|--|
| VU 0364770                   | GRM4                                                                                                                |  |
| U-104                        | CA12                                                                                                                |  |
| Daunorubicin HCl             | TOP2                                                                                                                |  |
| PF-562271                    | PTK2                                                                                                                |  |
| AZD3463                      | ALK, IGFR1                                                                                                          |  |
| IOX2                         | EGLN1                                                                                                               |  |
| IMD 0354                     | IKBKB, CHUK                                                                                                         |  |
| CRT0044876                   | APE1                                                                                                                |  |
| TCID                         | UCHL3                                                                                                               |  |
| LB42708                      | FNTA                                                                                                                |  |
| Necrostatin-1                | RIPK1                                                                                                               |  |
| Empagliflozin (BI 10773)     | SLC5A2                                                                                                              |  |
| SU11274                      | MET                                                                                                                 |  |
| Bortezomib (PS-341)          | PSMC1                                                                                                               |  |
| YM155 (Sepantronium Bromide) | BIRC5                                                                                                               |  |
| Lenalidomide (CC-5013)       | TNF                                                                                                                 |  |
| Ivacaftor (VX-770)           | CFTR                                                                                                                |  |
| AUY922 (NVP-AUY922)          | HSP90A, HSP90B                                                                                                      |  |
| Agomelatine                  | HTR2C                                                                                                               |  |
| 17-AAG (Tanespimycin)        | HSP90                                                                                                               |  |
| SP600125                     | JKAMP, MAPK9, MAPK10; MAP2K4; MAP2K3, MAP2K6, AKT1, PRKC; MAPK1, MAPK14, CHEK1, EGFR                                |  |
| CEP-18770 (Delanzomib)       | PSMC1                                                                                                               |  |
| Oligomycin A                 | ATPAF1                                                                                                              |  |
| ICG-001                      | WNT                                                                                                                 |  |
| Stattic                      | STAT3                                                                                                               |  |
| SC144                        | IL6ST                                                                                                               |  |
| Panobinostat (LBH589)        | HDAC                                                                                                                |  |
| VX-680 (Tozasertib, MK-0457) | AURKA                                                                                                               |  |
| OSU-03012 (AR-12)            | PDK1                                                                                                                |  |
| 0                            | Akt1, PKC $\eta$ , PKC $\theta$ , PrkX, Akt3, Akt2, PKC $\delta$ , PKC $\beta$ , PKC $\epsilon$ , PKA, PKG1 $\beta$ |  |
| Everolimus (RAD001)          | MTOR                                                                                                                |  |
| Aniracetam                   | GRIA1,                                                                                                              |  |
| Doxazosin Mesylate           | ADRA1A                                                                                                              |  |
| Tosedostat (CHR2797)         | LAP3, NPEPPS, ANPEP                                                                                                 |  |
| Rebamipide                   | CCKAR                                                                                                               |  |
| Rasagiline Mesylate          | MAOB                                                                                                                |  |

|                                 |                                               |  |
|---------------------------------|-----------------------------------------------|--|
| PD128907 HCl                    | DDR3                                          |  |
| ADX-47273                       | GRM5                                          |  |
| AZ 3146                         | TTK, CENPE                                    |  |
| VU 0357121                      | GRM5                                          |  |
| (-)-MK 801 Maleate              | GRIN                                          |  |
| Mirabegron                      | ADRB3                                         |  |
| AP26113                         | ALK                                           |  |
| Birinapant                      | DIABLO (AP1)                                  |  |
| LDK378                          | ALK                                           |  |
| (S)-crizotinib                  | NUDT1                                         |  |
| ZM 447439                       | AURKA, AURKB                                  |  |
| BX-912                          | PDK1                                          |  |
| Tadalafil                       | PDE5                                          |  |
| Elvitegravir (GS-9137, JTK-303) | 0                                             |  |
| Fostamatinib (R788)             | SYK                                           |  |
| GSK J4 HCl                      | KDM6A, KDM6B                                  |  |
| TCS 359                         | FLT3                                          |  |
| ML133 HCl                       | KCNJ2                                         |  |
| T0070907                        | PPARG                                         |  |
| Gliquidone                      | KCNJ                                          |  |
| SC-514                          | IKBKB                                         |  |
| Caffeic Acid Phenethyl Ester    | NFKB                                          |  |
| SB431542                        | TGFBR1                                        |  |
| Odanacatib (MK-0822)            | CTSK                                          |  |
| Isotretinoin                    | 0                                             |  |
| VX-745                          | MAPK14                                        |  |
| GSK429286A                      | ROCK1, ROCK2                                  |  |
| SB408124                        | HCRTR1                                        |  |
| NMS-873                         | VCP                                           |  |
| Sorafenib                       | RAF1, BRAF, KDR                               |  |
| Sal003                          | EIF2A                                         |  |
| Lomeguatrib                     | MGMT                                          |  |
| Imidapril HCl                   | ACE                                           |  |
| Gliclazide                      | KCNJ                                          |  |
| Sotrastaurin                    | PRKC (especially PRKCQ;<br>inactive to PRKCZ) |  |
| BI-D1870                        | RPS6KA1, RPS6KA2, RPS6KA3,<br>RPS6KA4         |  |

**Table S4. Compounds killing >50% of 4 representative T-ALL PDTX cells derived from different transfers (T) challenged in interleukin supplemented StemSpan (SS) media.**

**PDTX 3053**

**(P.S. zero compounds killing at T11)**

| <b>T7</b>                     |                                     | <b>T8</b>                     |                      | <b>T9</b>                     |                                                                                                                                              |
|-------------------------------|-------------------------------------|-------------------------------|----------------------|-------------------------------|----------------------------------------------------------------------------------------------------------------------------------------------|
| <b>145 compounds</b>          |                                     | <b>129 compounds</b>          |                      | <b>75 compounds</b>           |                                                                                                                                              |
| <b>Compound</b>               | <b>Target</b>                       | <b>Compound</b>               | <b>Target</b>        | <b>Compound</b>               | <b>Target</b>                                                                                                                                |
| FG-4592                       | EPAS1, EPO                          | FG-4592                       | EPAS1, EPO           | FG-4592                       | EPAS1, EPO                                                                                                                                   |
| Rizatriptan Benzoate          | HTR1A                               | Rizatriptan Benzoate          | HTR1A                | Rizatriptan Benzoate          | HTR1A                                                                                                                                        |
| Fulvestrant                   | ESR                                 | Fulvestrant                   | ESR                  | Trospium chloride             | CHRM1                                                                                                                                        |
| Tolfenamic Acid               | PTGS2                               | Tolfenamic Acid               | PTGS2                | Granisetron HCl               | HTR3A                                                                                                                                        |
| Ramelteon                     | MTNR1A, MTNR1B                      | Ramelteon                     | MTNR1A, MTNR1B       | A-769662                      | PRKAA1                                                                                                                                       |
| Trospium chloride             | CHRM1                               | Trospium chloride             | CHRM1                | Losartan Potassium (DuP 753)  | AGTR                                                                                                                                         |
| Granisetron HCl               | HTR3A                               | Granisetron HCl               | HTR3A                | Tolazoline HCl                | ADRA1A                                                                                                                                       |
| A-769662                      | PRKAA1                              | A-769662                      | PRKAA1               | Tenofovir Disoproxil Fumarate | 0                                                                                                                                            |
| Losartan Potassium (DuP 753)  | AGTR                                | Losartan Potassium (DuP 753)  | AGTR                 | Ataluren (PTC124)             | CFTR                                                                                                                                         |
| Tolazoline HCl                | ADRA1A                              | Tolazoline HCl                | ADRA1A               | Candesartan                   | AGTR                                                                                                                                         |
| Tenofovir Disoproxil Fumarate | 0                                   | Tenofovir Disoproxil Fumarate | 0                    | Belinostat (PXD101)           | HDAC                                                                                                                                         |
| Ataluren (PTC124)             | CFTR                                | Ataluren (PTC124)             | CFTR                 | Semagacestat (LY450139)       | APP, NOTCH                                                                                                                                   |
| Candesartan                   | AGTR                                | Candesartan                   | AGTR                 | NVP-ADW742                    | IGFR1                                                                                                                                        |
| Belinostat (PXD101)           | HDAC                                | Belinostat (PXD101)           | HDAC                 | NSC 319726                    | TP53 (R175)                                                                                                                                  |
| Semagacestat (LY450139)       | APP, NOTCH                          | Semagacestat (LY450139)       | APP, NOTCH           | ABT-263 (Navitoclax)          | BCL2, BCL2L1, BCL2L2                                                                                                                         |
| NVP-ADW742                    | IGFR1                               | NVP-ADW742                    | IGFR1                | MLN8054                       | AURKA                                                                                                                                        |
| NSC 319726                    | TP53 (R175)                         | NSC 319726                    | TP53 (R175)          | PR-619                        | ATXN7L3, BAP1, OTUB1, OTUD1, OTUD6A, OTUDB7A, UBB, UCHL3, USP1, USP2, USP4, USP5, USP7, USP8, USP14, USP15, USP17, USP26, USP30, USP36, YOD1 |
| Icotinib                      | EGFR                                | STF-118804                    | NAMPT                | Safinamide Mesylate           | MAOB, MAOA                                                                                                                                   |
| Ilomastat (GM6001, Galardin)  | MMP1, MMP2, MMP3, MMP7, MMP8, MMP9, | ABT-263 (Navitoclax)          | BCL2, BCL2L1, BCL2L2 | 4E1RCat                       | EIF4E                                                                                                                                        |

|                           |                                                                                                                                                                                                          |                                              |                                                                                                                                                                                           |                                         |                               |
|---------------------------|----------------------------------------------------------------------------------------------------------------------------------------------------------------------------------------------------------|----------------------------------------------|-------------------------------------------------------------------------------------------------------------------------------------------------------------------------------------------|-----------------------------------------|-------------------------------|
|                           | MMP12,<br>MMP14,<br>MMP26                                                                                                                                                                                |                                              |                                                                                                                                                                                           |                                         |                               |
| Rivaroxaban               | F10                                                                                                                                                                                                      | MLN8054                                      | AURKA                                                                                                                                                                                     | Tofacitinib<br>(CP-690550, Tasocitinib) | JAK3                          |
| STF-118804                | NAMPT                                                                                                                                                                                                    | PR-619                                       | ATXN7L3,<br>BAP1,<br>OTUB1,<br>OTUD1,<br>OTUD6A,<br>OTUDB7A,<br>UBB, UCHL3,<br>USP1, USP2,<br>USP4, USP5,<br>USP7, USP8,<br>USP14,<br>USP15,<br>USP17,<br>USP26,<br>USP30,<br>USP36, YOD1 | Ozagrel                                 | TBXA2R                        |
| Rimonabant                | CNR1                                                                                                                                                                                                     | Roxatidine<br>Acetate HCl                    | HRH2                                                                                                                                                                                      | MRS 2578                                | P2RY6                         |
| FLI-06                    | NOTCH                                                                                                                                                                                                    | Atorvastatin<br>Calcium                      | HMGCR                                                                                                                                                                                     | Vildagliptin<br>(LAF-237)               | DPP4                          |
| Sitaxentan<br>sodium      | EDNRA                                                                                                                                                                                                    | SNS-032 (BMS-<br>387032)                     | CDK2                                                                                                                                                                                      | Enzastaurin<br>(LY317615)               | PRKCB, PRKCA,<br>PRKCG, PRKCE |
| ABT-263<br>(Navitoclax)   | BCL2,<br>BCL2L1,<br>BCL2L2                                                                                                                                                                               | SB705498                                     | TRPV1                                                                                                                                                                                     | Anastrozole                             | CYP19A1                       |
| Brinzolamide              | CA2                                                                                                                                                                                                      | Safinamide<br>Mesylate                       | MAOB, MAOA                                                                                                                                                                                | SB743921                                | 0                             |
| Tandutinib<br>(MLN518)    | FLT3,<br>PDGFR<br>KIT                                                                                                                                                                                    | Tenofovir                                    | 0                                                                                                                                                                                         | SN-38                                   | TOP1                          |
| MLN8054                   | AURKA                                                                                                                                                                                                    | Irinotecan HCl<br>Trihydrate                 | TOP1                                                                                                                                                                                      | KPT-185                                 | XPO1                          |
| PR-619                    | ATXN7L3,<br>BAP1,<br>OTUB1,<br>OTUD1,<br>OTUD6A,<br>OTUDB7A,<br>UBB,<br>UCHL3,<br>USP1,<br>USP2,<br>USP4,<br>USP5,<br>USP7,<br>USP8,<br>USP14,<br>USP15,<br>USP17,<br>USP26,<br>USP30,<br>USP36,<br>YOD1 | 4E1RCat                                      | EIF4E                                                                                                                                                                                     | OG-L002                                 | KDM1A                         |
| Roxatidine<br>Acetate HCl | HRH2                                                                                                                                                                                                     | Tofacitinib (CP-<br>690550, Tasocitin<br>ib) | JAK3                                                                                                                                                                                      | MK-1775                                 | WEE1                          |
| GSK1904529<br>A           | IGFR1,<br>INSR                                                                                                                                                                                           | Ozagrel                                      | TBXA2R                                                                                                                                                                                    | Ouabain                                 | ATP1B                         |
| Atorvastatin<br>Calcium   | HMGCR                                                                                                                                                                                                    | AZD4547                                      | FGFR1,<br>FGFR2,<br>FGFR3                                                                                                                                                                 | Fluvastatin<br>Sodium                   | HMGCR                         |

|                                       |                  |                              |                              |                              |                              |
|---------------------------------------|------------------|------------------------------|------------------------------|------------------------------|------------------------------|
| SNS-032 (BMS-387032)                  | CDK2             | GW9508                       | FFAR1, FFAR4                 | Propranolol HCl              | ADRB1                        |
| Vemurafenib (PLX4032, RG7204)         | BRAF (V600E)     | MRS 2578                     | P2RY6                        | KPT-276                      | XPO1                         |
| Pancuronium dibromide                 | 0                | AGI-5198                     | IDH1                         | KPT-330                      | XPO1                         |
| Loratadine                            | HRH1             | Vildagliptin (LAF-237)       | DPP4                         | Palbociclib (PD-0332991) HCl | CDK4, CDK6                   |
| PNU-120596                            | 0                | Dynasore                     | DNM1, DNM2                   | EHop-016                     | RAC1, RAC3                   |
| AZD6482                               | PIK3CB           | Piceatannol                  | SYK                          | KX2-391                      | SRC                          |
| Safinamide Mesylate                   | MAOB, MAOA       | Quizartinib (AC220)          | FLT3                         | Crenolanib (CP-868596)       | PDGFRA, PDGFRB, FLT3 (D842V) |
| Tenofovir                             | 0                | Enzastaurin (LY317615)       | PRKCB, PRKCA, PRKCG, PRKCE   | Enzalutamide (MDV3100)       | AR                           |
| P22077                                | USP7, USP47      | Anastrozole                  | CYP19A1                      | PD184352 (CI-1040)           | MAP2K1, MAP2K2               |
| Aloxistatin                           | 0                | SB743921                     | 0                            | PP2                          | SRC                          |
| Irinotecan HCl Trihydrate             | TOP1             | SN-38                        | TOP1                         | Trichostatin A (TSA)         | ALL HDACS (Except HDAC8)     |
| Ferrostatin-1 (Fer-1)                 | VDAC             | (+)-JQ1                      | BRD4                         | Ispinesib (SB-715992)        | 0                            |
| OTX015                                | BRD2, BRD3, BRD4 | KPT-185                      | XPO1                         | RepSox                       | TGFBR1                       |
| Ibrutinib (PCI-32765)                 | BTK              | OG-L002                      | KDM1A                        | Levosulpiride                | DRD2                         |
| 4E1RCat                               | EIF4E            | MK-1775                      | WEE1                         | Daunorubicin HCl             | TOP2                         |
| Tofacitinib (CP-690550, Taso citinib) | JAK3             | BMS-707035                   | 0                            | AZD3463                      | ALK, IGF1R                   |
| PHA-793887                            | CDK2, CDK5, CDK7 | Ouabain                      | ATP1B                        | IMD 0354                     | IKBKB, CHUK                  |
| WZ811                                 | CXCR4            | Fluvastatin Sodium           | HMGCR                        | Bortezomib (PS-341)          | PSMC1                        |
| HC-030031                             | TRPA1            | Propranolol HCl              | ADRB1                        | YM155 (Sepantronium Bromide) | BIRC5                        |
| Telmisartan                           | AGTR             | KPT-276                      | XPO1                         | CEP-18770 (Delanzomib)       | PSMC1                        |
| Cyproterone Acetate                   | AR               | KPT-330                      | XPO1                         | Aprepitant                   | TACR1                        |
| Sodium 4-Aminosalicylate              | NFKB             | NSC 23766                    | RAC                          | Fluvoxamine maleate          | 0                            |
| GSK1292263                            | GPR119           | Palbociclib (PD-0332991) HCl | CDK4, CDK6                   | Oligomycin A                 | ATPAF1                       |
| SGC 0946                              | DOT1L            | EHop-016                     | RAC1, RAC3                   | Ginkgolide A                 | GABR                         |
| LY2157299                             | TGFBR1           | KX2-391                      | SRC                          | Cryptotanshinone             | STAT3                        |
| IPA-3                                 | PAK1             | Crenolanib (CP-868596)       | PDGFRA, PDGFRB, FLT3 (D842V) | ICG-001                      | WNT                          |
| Esomeprazole Sodium                   | ATP4A            | Enzalutamide (MDV3100)       | AR                           | Stattic                      | STAT3                        |
| Ozagrel                               | TBXA2R           | PD184352 (CI-1040)           | MAP2K1, MAP2K2               | SC144                        | IL6ST                        |

|                                        |                                     |                            |                                 |                          |                                                  |
|----------------------------------------|-------------------------------------|----------------------------|---------------------------------|--------------------------|--------------------------------------------------|
| AZD4547                                | FGFR1,<br>FGFR2,<br>FGFR3           | OSI-906<br>(Linsitinib)    | IGFR1, INSR                     | SRPIN340                 | SRPK1                                            |
| GNF-2                                  | ABL1                                | Pralatrexate               | DHFR                            | Panobinostat<br>(LBH589) | HDAC                                             |
| TPCA-1                                 | IKBKB                               | PP2                        | SRC                             | MK-8245                  | SCD                                              |
| T0901317                               | NR1H3,<br>NR1H2,<br>NR1H4           | CHIR-124                   | CHEK1                           | Apatinib                 | KDR                                              |
| PYR-41                                 | UBA1                                | Trichostatin A<br>(TSA)    | ALL HDACS<br>(Except<br>HDAC8)  | Birinapant               | DIABLO (AP1)                                     |
| LDN-212854                             | ACVR1,<br>ACVRL1                    | Loxistatin Acid<br>(E-64C) | 0                               | AZD1981                  | PTGDR2                                           |
| Ki16425                                | LPAR1,<br>LPAR2,<br>LPAR3           | Zibotentan<br>(ZD4054)     | EDNRA                           | GSK J4 HCl               | KDM6A, KDM6B                                     |
| Oxcarbazepine                          | SCN                                 | Pyrimethamine              | DHFR                            | ZCL278                   | CDC42                                            |
| MRS 2578                               | P2RY6                               | RKI-1447                   | ROCK1,<br>ROCK2                 | Odanacatib<br>(MK-0822)  | CTSK                                             |
| AGI-5198                               | IDH1                                | Letrozole                  | CYP19A1                         | Stavudine<br>(d4T)       | 0                                                |
| BTB06584                               | ATP5A1                              | GW2580                     | CSF1R                           | Mubritinib<br>(TAK 165)  | ERBB2                                            |
| Dalcetrapib<br>(JTT-705,<br>RO4607381) | CETP                                | MLN2238                    | PSMC1                           | AZ20                     | ATR                                              |
| Iniparib (BSI-201)                     | PARP1                               | Ticlopidine HCl            | P2RY                            | NH125                    | EEF2K, PRKC,<br>PRKA, CAMK2,<br>Histidine Kinase |
| Vildagliptin<br>(LAF-237)              | DPP4                                | SANT-1                     | SMO                             | BI 2536                  | PLK1, PLK2,<br>PLK3                              |
| Dynasore                               | DNM1,<br>DNM2                       | Ispinesib (SB-715992)      | 0                               |                          |                                                  |
| Piceatannol                            | SYK                                 | JSH-23                     | NFKB                            |                          |                                                  |
| Quizartinib<br>(AC220)                 | FLT3                                | Pramipexole                | DRD2S, DRD2<br>L, DRD3,<br>DRD4 |                          |                                                  |
| Enzastaurin<br>(LY317615)              | PRKCB,<br>PRKCA,<br>PRKCG,<br>PRKCE | RepSox                     | TGFBR1                          |                          |                                                  |
| Anastrozole                            | CYP19A1                             | SNS-314<br>Mesylate        | AURKA,<br>AURKB,<br>AURKC       |                          |                                                  |
| SB743921                               | 0                                   | BGJ398 (NVP-BGJ398)        | FGFR1,<br>FGFR2,<br>FGFR3       |                          |                                                  |
| SN-38                                  | TOP1                                | Irinotecan                 | TOP1                            |                          |                                                  |
| Wnt-C59<br>(C59)                       | WNT3A                               | Bupivacaine HCl            | ADCY4                           |                          |                                                  |
| BAM7                                   | BAX                                 | UNC669                     | L3MBTL1                         |                          |                                                  |
| (+)-JQ1                                | BRD4                                | AG-14361                   | PARP1                           |                          |                                                  |
| KPT-185                                | XPO1                                | LY411575                   | APP, NOTCH                      |                          |                                                  |
| OG-L002                                | KDM1A                               | NLG919                     | IDO1                            |                          |                                                  |
| MK-1775                                | WEE1                                | Levosulpiride              | DRD2                            |                          |                                                  |
| AT101                                  | BCL2,<br>BCL2L1,<br>MCL1            | Imatinib<br>(STI571)       | ABL1, KIT,<br>PDGFR             |                          |                                                  |
| BMS-707035                             | 0                                   | DCC-2036<br>(Rebastinib)   | ABL1, SRC,<br>LYN, FGR,         |                          |                                                  |

|                                    |                                   |                                     |                                                                                                                 |  |
|------------------------------------|-----------------------------------|-------------------------------------|-----------------------------------------------------------------------------------------------------------------|--|
|                                    |                                   |                                     | HCK, KDR,<br>FLT3                                                                                               |  |
| Ouabain                            | ATP1B                             | Daunorubicin<br>HCl                 | TOP2                                                                                                            |  |
| Fluvastatin<br>Sodium              | HMGCR                             | AZD3463                             | ALK, IGFR1                                                                                                      |  |
| Propranolol<br>HCl                 | ADRB1                             | IOX2                                | EGLN1                                                                                                           |  |
| KPT-276                            | XPO1                              | IMD 0354                            | IKBKB, CHUK                                                                                                     |  |
| KPT-330                            | XPO1                              | CRT0044876                          | APE1                                                                                                            |  |
| Exemestane                         | CYP19A1                           | LB42708                             | FNTA                                                                                                            |  |
| Palbociclib<br>(PD-0332991)<br>HCl | CDK4,<br>CDK6                     | Bortezomib (PS-<br>341)             | PSMC1                                                                                                           |  |
| EHop-016                           | RAC1,<br>RAC3                     | YM155<br>(Sepantronium<br>Bromide)  | BIRC5                                                                                                           |  |
| SGL-1776 free<br>base              | PIM1,<br>FLT3,<br>GSG2            | 17-AAG<br>(Tanespimycin)            | HSP90                                                                                                           |  |
| KX2-391                            | SRC                               | SP600125                            | JKAMP,<br>MAPK9,<br>MAPK10;<br>MAP2K4;<br>MAP2K3,<br>MAP2K6,<br>AKT1, PRKC;<br>MAPK1,<br>MAPK14,<br>CHEK1, EGFR |  |
| Enzalutamide<br>(MDV3100)          | AR                                | CEP-18770<br>(Delanzomib)           | PSMC1                                                                                                           |  |
| PD184352<br>(CI-1040)              | MAP2K1,<br>MAP2K2                 | Aprepitant                          | TACR1                                                                                                           |  |
| OSI-906<br>(Linsitinib)            | IGFR1,<br>INSR                    | Fluvoxamine<br>maleate              | 0                                                                                                               |  |
| Methotrexate                       | DHFR                              | Oligomycin A                        | ATPAF1                                                                                                          |  |
| Pralatrexate                       | DHFR                              | Ginkgolide A                        | GABR                                                                                                            |  |
| Enalaprilat<br>Dihydrate           | ACE                               | Cryptotanshinon<br>e                | STAT3                                                                                                           |  |
| Trichostatin A<br>(TSA)            | ALL<br>HDACS<br>(Except<br>HDAC8) | ICG-001                             | WNT                                                                                                             |  |
| WZ4003                             | NUAK1,<br>NUAK2                   | Stattic                             | STAT3                                                                                                           |  |
| MLN2238                            | PSMC1                             | SC144                               | IL6ST                                                                                                           |  |
| Ispinesib (SB-<br>715992)          | 0                                 | SRPIN340                            | SRPK1                                                                                                           |  |
| SNS-314<br>Mesylate                | AURKA,<br>AURKB,<br>AURKC         | Panobinostat<br>(LBH589)            | HDAC                                                                                                            |  |
| Irinotecan                         | TOP1                              | VX-680<br>(Tozasertib, MK-<br>0457) | AURKA                                                                                                           |  |
| Rigosertib<br>(ON-01910)           | PLK1,<br>PLK2                     | MK-8245                             | SCD                                                                                                             |  |
| Rolipram                           | PDE4                              | Doxazosin<br>Mesylate               | ADRA1A                                                                                                          |  |
| Bupivacaine<br>HCl                 | ADCY4                             | Ginkgolide B                        | PTAFR                                                                                                           |  |
| UNC669                             | L3MBTL1                           | Apatinib                            | KDR                                                                                                             |  |
| Entacapone                         | COMT                              | AZD1981                             | PTGDR2                                                                                                          |  |

|                                      |                                                           |                                 |                                                        |  |
|--------------------------------------|-----------------------------------------------------------|---------------------------------|--------------------------------------------------------|--|
| AG-14361                             | PARP1                                                     | Tadalafil                       | PDE5                                                   |  |
| NLG919                               | IDO1                                                      | GSK J4 HCl                      | KDM6A,<br>KDM6B                                        |  |
| Levosulpiride                        | DRD2                                                      | ZCL278                          | CDC42                                                  |  |
| Daunorubicin<br>HCl                  | TOP2                                                      | Caffeic Acid<br>Phenethyl Ester | NFKB                                                   |  |
| IMD 0354                             | IKBKB,<br>CHUK                                            | Stavudine (d4T)                 | 0                                                      |  |
| CRT0044876                           | APE1                                                      | Mubritinib (TAK<br>165)         | ERBB2                                                  |  |
| TCID                                 | UCHL3                                                     | BMS-378806                      | CD4                                                    |  |
| LB42708                              | FNTA                                                      | AZ20                            | ATR                                                    |  |
| Bortezomib<br>(PS-341)               | PSMC1                                                     | NMS-873                         | VCP                                                    |  |
| YM155<br>(Sepantroni-<br>um Bromide) | BIRC5                                                     | NH125                           | EEF2K, PRKC,<br>PRKA,<br>CAMK2,<br>Histidine<br>Kinase |  |
| Agomelatine                          | HTR2C                                                     | BI 2536                         | PLK1, PLK2,<br>PLK3                                    |  |
| CEP-18770<br>(Delanzomib)            | PSMC1                                                     | GSK461364                       | PLK1, PLK2,<br>PLK3                                    |  |
| Oligomycin A                         | ATPAF1                                                    |                                 |                                                        |  |
| ICG-001                              | WNT                                                       |                                 |                                                        |  |
| Stattic                              | STAT3                                                     |                                 |                                                        |  |
| SC144                                | IL6ST                                                     |                                 |                                                        |  |
| Panobinostat<br>(LBH589)             | HDAC                                                      |                                 |                                                        |  |
| VX-680<br>(Tozasertib,<br>MK-0457)   | AURKA                                                     |                                 |                                                        |  |
| Birinapant                           | DIABLO<br>(AP1)                                           |                                 |                                                        |  |
| Tadalafil                            | PDE5                                                      |                                 |                                                        |  |
| GSK J4 HCl                           | KDM6A,<br>KDM6B                                           |                                 |                                                        |  |
| ZCL278                               | CDC42                                                     |                                 |                                                        |  |
| Stavudine<br>(d4T)                   | 0                                                         |                                 |                                                        |  |
| Mubritinib<br>(TAK 165)              | ERBB2                                                     |                                 |                                                        |  |
| AZ20                                 | ATR                                                       |                                 |                                                        |  |
| NMS-873                              | VCP                                                       |                                 |                                                        |  |
| NH125                                | EEF2K,<br>PRKC,<br>PRKA,<br>CAMK2,<br>Histidine<br>Kinase |                                 |                                                        |  |
| BI 2536                              | PLK1,<br>PLK2,<br>PLK3                                    |                                 |                                                        |  |
| GSK461364                            | PLK1,<br>PLK2,<br>PLK3                                    |                                 |                                                        |  |



**PDTX 3119**

| <b>T2</b><br><b>235 compounds</b> |                                                                                                                    | <b>T4</b><br><b>26 compounds</b>     |                              |
|-----------------------------------|--------------------------------------------------------------------------------------------------------------------|--------------------------------------|------------------------------|
| <b>Compound</b>                   | <b>Target</b>                                                                                                      | <b>Compound</b>                      | <b>Target</b>                |
| FG-4592                           | EPAS1, EPO                                                                                                         | Tenofovir Disoproxil Fumarate        | 0                            |
| Rizatriptan Benzoate              | HTR1A                                                                                                              | Belinostat (PXD101)                  | HDAC                         |
| Fulvestrant                       | ESR                                                                                                                | NSC 319726                           | TP53 (R175)                  |
| Tolfenamic Acid                   | PTGS2                                                                                                              | STF-118804                           | NAMPT                        |
| Ramelteon                         | MTNR1A, MTNR1B                                                                                                     | ABT-263 (Navitoclax)                 | BCL2, BCL2L1, BCL2L2         |
| Trospium chloride                 | CHRM1                                                                                                              | Ganetespib (STA-9090)                | HSP90                        |
| Granisetron HCl                   | HTR3A                                                                                                              | Ruxolitinib (INCB018424)             | JAK1, JAK2                   |
| A-769662                          | PRKAA1                                                                                                             | Tofacitinib (CP-690550, Tasocitinib) | JAK3                         |
| Losartan Potassium (DuP 753)      | AGTR                                                                                                               | PHA-793887                           | CDK2, CDK5, CDK7             |
| Tolazoline HCl                    | ADRA1A                                                                                                             | KPT-185                              | XPO1                         |
| Tenofovir Disoproxil Fumarate     | 0                                                                                                                  | MK-1775                              | WEE1                         |
| Ataluren (PTC124)                 | CFTR                                                                                                               | Ouabain                              | ATP1B                        |
| Candesartan                       | AGTR                                                                                                               | KX2-391                              | SRC                          |
| Belinostat (PXD101)               | HDAC                                                                                                               | Crenolanib (CP-868596)               | PDGFRA, PDGFRB, FLT3 (D842V) |
| Semagacestat (LY450139)           | APP, NOTCH                                                                                                         | CHIR-124                             | CHEK1                        |
| NVP-ADW742                        | IGFR1                                                                                                              | Trichostatin A (TSA)                 | ALL HDACS (Except HDAC8)     |
| NSC 319726                        | TP53 (R175)                                                                                                        | AZD7762                              | CHEK1, CHEK2                 |
| Icotinib                          | EGFR                                                                                                               | DBeQ                                 | VCP                          |
| Ilomastat (GM6001, Galardin)      | MMP1, MMP2, MMP3, MMP7, MMP8, MMP9, MMP12, MMP14, MMP26                                                            | Bortezomib (PS-341)                  | PSMC1                        |
| Rivaroxaban                       | F10                                                                                                                | YM155 (Sepantronium Bromide)         | BIRC5                        |
| STF-118804                        | NAMPT                                                                                                              | AUY922 (NVP-AUY922)                  | HSP90A, HSP90B               |
| Rimonabant                        | CNR1                                                                                                               | 17-AAG (Tanespimycin)                | HSP90                        |
| FLI-06                            | NOTCH                                                                                                              | CEP-18770 (Delanzomib)               | PSMC1                        |
| Sitaxentan sodium                 | EDNRA                                                                                                              | Oligomycin A                         | ATPAF1                       |
| ABT-263 (Navitoclax)              | BCL2, BCL2L1, BCL2L2                                                                                               | Stattic                              | STAT3                        |
| Brinzolamide                      | CA2                                                                                                                | SC144                                | IL6ST                        |
| Tandutinib (MLN518)               | FLT3, PDGFR KIT                                                                                                    | Rasagiline Mesylate                  | MAOB                         |
| Zebularine                        | DNMT1, DNMT3A, DNMT3B                                                                                              | (S)-crizotinib                       | NUDT1                        |
| MLN8054                           | AURKA                                                                                                              | GSK J4 HCl                           | KDM6A, KDM6B                 |
| PR-619                            | ATXN7L3, BAP1, OTUB1, OTUD1, OTUD6A, OTUDB7A, UBB, UCHL3, USP1, USP2, USP4, USP5, USP7, USP8, USP14, USP15, USP17, | Caffeic Acid Phenethyl Ester         | NFKB                         |

|                                          |                              |              |                                                  |
|------------------------------------------|------------------------------|--------------|--------------------------------------------------|
|                                          | USP26, USP30, USP36,<br>YOD1 |              |                                                  |
| Roxatidine Acetate HCl                   | HRH2                         | AZ20         | ATR                                              |
| GSK1904529A                              | IGFR1, INSR                  | NMS-873      | VCP                                              |
| Atorvastatin Calcium                     | HMGCR                        | GSK461364    | PLK1, PLK2, PLK3                                 |
| SNS-032 (BMS-387032)                     | CDK2                         | Sotrastaurin | PRKC (especially<br>PRKCQ; inactive to<br>PRKCZ) |
| Naltrexone HCl                           | OPRK1, OPRM1, OPRD1          | BI-D1870     | RPS6KA1,<br>RPS6KA2,<br>RPS6KA3,<br>RPS6KA4      |
| Ganetespib (STA-9090)                    | HSP90                        |              |                                                  |
| CGS 21680 HCl                            | ADORA2A                      |              |                                                  |
| Pancuronium dibromide                    | 0                            |              |                                                  |
| Loratadine                               | HRH1                         |              |                                                  |
| PNU-120596                               | 0                            |              |                                                  |
| Ruxolitinib (INCB018424)                 | JAK1, JAK2                   |              |                                                  |
| GW3965 HCl                               | NR1H3, NR1H2                 |              |                                                  |
| AZD6482                                  | PIK3CB                       |              |                                                  |
| SB705498                                 | TRPV1                        |              |                                                  |
| Safinamide Mesylate                      | MAOB, MAOA                   |              |                                                  |
| Tenofovir                                | 0                            |              |                                                  |
| P22077                                   | USP7, USP47                  |              |                                                  |
| Aloxistatin                              | 0                            |              |                                                  |
| NSC697923                                | UBE2                         |              |                                                  |
| Apixaban                                 | F10                          |              |                                                  |
| ML347                                    | ACVR1, ACVRL1                |              |                                                  |
| Irinotecan HCl Trihydrate                | TOP1                         |              |                                                  |
| SSR128129E                               | FGFR1                        |              |                                                  |
| VX-765                                   | CASP1                        |              |                                                  |
| Ferrostatin-1 (Fer-1)                    | VDAC                         |              |                                                  |
| PF-3845                                  | FAAH                         |              |                                                  |
| OTX015                                   | BRD2, BRD3, BRD4             |              |                                                  |
| Ibrutinib (PCI-32765)                    | BTK                          |              |                                                  |
| 4E1RCat                                  | EIF4E                        |              |                                                  |
| Tofacitinib (CP-<br>690550, Tasocitinib) | JAK3                         |              |                                                  |
| PHA-793887                               | CDK2, CDK5, CDK7             |              |                                                  |
| WZ811                                    | CXCR4                        |              |                                                  |
| Allopurinol                              | HCRTR1, HCRTR2               |              |                                                  |
| HC-030031                                | TRPA1                        |              |                                                  |
| Telmisartan                              | AGTR                         |              |                                                  |
| Mozavaptan                               | AVPR1, AVPR2                 |              |                                                  |
| Cyproterone Acetate                      | AR                           |              |                                                  |
| Sodium 4-Aminosalicylate                 | NFKB                         |              |                                                  |

|                                     |                              |  |
|-------------------------------------|------------------------------|--|
| GSK1292263                          | GPR119                       |  |
| SGC 0946                            | DOT1L                        |  |
| LY2157299                           | TGFBR1                       |  |
| IPA-3                               | PAK1                         |  |
| Esomeprazole Sodium                 | ATP4A                        |  |
| DMH1                                | ACVR1                        |  |
| Ozagrel                             | TBXA2R                       |  |
| AZD4547                             | FGFR1, FGFR2, FGFR3          |  |
| GW9508                              | FFAR1, FFAR4                 |  |
| VE-821                              | ATR                          |  |
| NSC 405020                          | MMP14                        |  |
| GNF-2                               | ABL1                         |  |
| TPCA-1                              | IKBKB                        |  |
| T0901317                            | NR1H3, NR1H2, NR1H4          |  |
| PD0325901                           | MAP2K1, MAP2K2               |  |
| PYR-41                              | UBA1                         |  |
| U0126-EtOH                          | MAP2K1, MAP2K2               |  |
| C646                                | EP300                        |  |
| Oxcarbazepine                       | SCN                          |  |
| Mdivi-1                             | DRP1, DNM1                   |  |
| MRS 2578                            | P2RY6                        |  |
| AGI-5198                            | IDH1                         |  |
| LY2603618                           | CHEK1                        |  |
| BTB06584                            | ATP5A1                       |  |
| NPS-2143                            | CASR                         |  |
| Veliparib (ABT-888)                 | PARP1, PARP2                 |  |
| Dalcetrapib (JTT-705,<br>RO4607381) | CETP                         |  |
| Vandetanib (ZD6474)                 | KDR                          |  |
| Istradefylline                      | ADORA2A                      |  |
| Iniparib (BSI-201)                  | PARP1                        |  |
| Dabrafenib (GSK2118436)             | BRAF (V600)                  |  |
| Finasteride                         | SRD5A2                       |  |
| Tyrphostin AG 879                   | ERBB2                        |  |
| Cilomilast                          | PDE4                         |  |
| TAE226 (NVP-TAE226)                 | PTK2, PTK2B                  |  |
| Ozagrel HCl                         | TBXAS1                       |  |
| Vildagliptin (LAF-237)              | DPP4                         |  |
| Dynasore                            | DNM1, DNM2                   |  |
| Piceatannol                         | SYK                          |  |
| Quizartinib (AC220)                 | FLT3                         |  |
| Tenovin-6                           | TP53, SIRT2, SIRT1,<br>SIRT3 |  |

|                        |                              |  |
|------------------------|------------------------------|--|
| Enzastaurin (LY317615) | PRKCB, PRKCA, PRKCG, PRKCE   |  |
| CGP 57380              | MKNK1                        |  |
| Bisoprolol fumarate    | ADRB1                        |  |
| Bosutinib (SKI-606)    | SRC, ABL1                    |  |
| S3I-201                | STAT3                        |  |
| HA14-1                 | BCL2                         |  |
| ADL5859 HCl            | OPRK1, OPRM1                 |  |
| Voriconazole           | CYP51A1                      |  |
| BIBR 1532              | TERT                         |  |
| Thiazovivin            | ROCK1, ROCK2                 |  |
| Anastrozole            | CYP19A1                      |  |
| SB743921               | 0                            |  |
| EUK 134                | SOD1                         |  |
| Bergenin               | 0                            |  |
| SN-38                  | TOP1                         |  |
| CP-91149               | PYGL, PYGM, PYGB             |  |
| Wnt-C59 (C59)          | WNT3A                        |  |
| NU7026                 | PRKDC                        |  |
| BAM7                   | BAX                          |  |
| ZM 306416              | FLT1                         |  |
| (+)-JQ1                | BRD4                         |  |
| GW9662                 | PPARG                        |  |
| KPT-185                | XPO1                         |  |
| Pifithrin- $\mu$       | TP53, HSPBP1                 |  |
| Batimastat (BB-94)     | MMP1, MMP2, MMP3, MMP7, MMP9 |  |
| Sertraline HCl         | 0                            |  |
| OG-L002                | KDM1A                        |  |
| MK-1775                | WEE1                         |  |
| Costunolide            | TERT                         |  |
| AT101                  | BCL2, BCL2L1, MCL1           |  |
| GSK690693              | AKT1, AKT2, AKT3             |  |
| Tropicamide            | CHRM4                        |  |
| BMS-707035             | 0                            |  |
| Raltegravir (MK-0518)  | 0                            |  |
| EX 527 (Selisistat)    | SIRT1                        |  |
| CCT128930              | AKT2                         |  |
| Pomalidomide           | TNF                          |  |
| Tie2 kinase inhibitor  | TEK                          |  |
| Ouabain                | ATP1B                        |  |
| Ranitidine             | HRH2                         |  |
| SKI II                 | S1PR                         |  |

|                              |                                 |  |
|------------------------------|---------------------------------|--|
| Fluvastatin Sodium           | HMGCR                           |  |
| Propranolol HCl              | ADRB1                           |  |
| Erastin                      | VDAC                            |  |
| Ifenprodil Tartrate          | GRIN                            |  |
| KPT-276                      | XPO1                            |  |
| AZD2461                      | PARP                            |  |
| KPT-330                      | XPO1                            |  |
| AGI-6780                     | IDH2                            |  |
| SGI-1027                     | DNMT1, DNMT3A,<br>DNMT3B        |  |
| Atglistatin                  | PNPLA2                          |  |
| Suvorexant (MK-4305)         | HCRTR1, HCRTR2                  |  |
| SRT1720                      | SIRT1                           |  |
| 4EGI-1                       | EIF4E                           |  |
| Exemestane                   | CYP19A1                         |  |
| NSC 23766                    | RAC                             |  |
| 2-Methoxyestradiol (2-MeOE2) | HIF1A                           |  |
| Palbociclib (PD-0332991) HCl | CDK4, CDK6                      |  |
| EHop-016                     | RAC1, RAC3                      |  |
| PF-573228                    | PTK2                            |  |
| ABT-199 (GDC-0199)           | BCL2                            |  |
| PTC-209                      | BMI1                            |  |
| Trimebutine                  | OPRK1, OPRM1, OPRD1             |  |
| CK-636                       | ARPC2, ARPC3                    |  |
| SGI-1776 free base           | PIM1, FLT3, GSG2                |  |
| AZD7545                      | PDK1, PDK2                      |  |
| URB597                       | FAAH                            |  |
| Pacritinib (SB1518)          | JAK2, FLT3                      |  |
| KX2-391                      | SRC                             |  |
| PluriSIn #1 (NSC 14613)      | SCD                             |  |
| Crenolanib (CP-868596)       | PDGFRA, PDGFRB, FLT3<br>(D842V) |  |
| Enzalutamide (MDV3100)       | AR                              |  |
| PFI-1 (PF-6405761)           | BRD4                            |  |
| Dapagliflozin                | SLC5A2                          |  |
| Maraviroc                    | CCR5                            |  |
| Nebivolol                    | ADRB1                           |  |
| I-BET151 (GSK1210151A)       | BRD2, BRD3, BRD4                |  |
| Apoptosis Activator 2        | CASP3                           |  |
| Naproxen                     | PTGS1, PTGS2                    |  |
| Bosentan Hydrate             | EDNRA, EDNRB                    |  |
| Acadesine                    | PRKAA1                          |  |

|                                    |                                |  |
|------------------------------------|--------------------------------|--|
| E-64                               | CTSK                           |  |
| Captopril                          | ACE                            |  |
| Selumetinib (AZD6244)              | MAP2K1, MAPK3, MAPK1           |  |
| Tolvaptan                          | AVPR2                          |  |
| PD184352 (CI-1040)                 | MAP2K1, MAP2K2                 |  |
| OSI-906 (Linsitinib)               | IGFR1, INSR                    |  |
| Canagliflozin                      | SLC5A2                         |  |
| CP-673451                          | PDGFRA, PDGFRB                 |  |
| Sirtinol                           | SIRT1, SIRT2                   |  |
| Methotrexate                       | DHFR                           |  |
| SAR131675                          | FLT4                           |  |
| Pralatrexate                       | DHFR                           |  |
| BML-190                            | CNR2                           |  |
| TWS119                             | GSK3B                          |  |
| IKK-16 (IKK Inhibitor VII)         | IKBKB, CHUK                    |  |
| Triamterene                        | SCN                            |  |
| Clemastine Fumarate                | HRH1                           |  |
| Fingolimod (FTY720) HCl            | S1PR                           |  |
| Amlodipine                         | CACNA1C                        |  |
| PP2                                | SRC                            |  |
| CHIR-124                           | CHEK1                          |  |
| Temsirolimus (CCI-779, NSC 683864) | MTOR                           |  |
| YO-01027                           | APP, APPL1, NOTCH              |  |
| Trichostatin A (TSA)               | ALL HDACS (Except HDAC8)       |  |
| PAC-1                              | CASP3                          |  |
| PHA-665752                         | MET                            |  |
| VE-822                             | ATR                            |  |
| SB203580                           | MAPK11, MAPK12, MAPK13, MAPK14 |  |
| EPZ-6438                           | EZH2                           |  |
| KU-55933 (ATM Kinase Inhibitor)    | ATM                            |  |
| CGK 733                            | ATM, ATR                       |  |
| WZ4002                             | EGFR                           |  |
| WZ4003                             | NUAK1, NUAK2                   |  |
| TAK-700 (Orteronel)                | CYP17A1                        |  |
| Loxistatin Acid (E-64C)            | 0                              |  |
| Zibotentan (ZD4054)                | EDNRA                          |  |
| Pyrimethamine                      | DHFR                           |  |
| RKI-1447                           | ROCK1, ROCK2                   |  |
| UNC2250                            | MERTK                          |  |
| SMI-4a                             | PIM1                           |  |

|                                  |                                |  |
|----------------------------------|--------------------------------|--|
| SB415286                         | GSK3A                          |  |
| PRT062607 (P505-15, BIIB057) HCl | SYK                            |  |
| Torcetrapib                      | CETP                           |  |
| MK-2206 2HCl                     | AKT1, AKT2, AKT3               |  |
| ML130 (Nodinitib-1)              | NOD1                           |  |
| PF-04217903                      | MET                            |  |
| Varespladib (LY315920)           | PLA2G2A                        |  |
| ML161                            | PARP1                          |  |
| MK-2866 (GTx-024)                | AR                             |  |
| Ticagrelor                       | P2RY12                         |  |
| Letrozole                        | CYP19A1                        |  |
| GW2580                           | CSF1R                          |  |
| Zosuquidar (LY335979) 3HCl       | ABCB1                          |  |
| KU-60019                         | ATM                            |  |
| LY2228820                        | MAPK11, MAPK12, MAPK13, MAPK14 |  |
| MLN2238                          | PSMC1                          |  |
| Org 27569                        | CNR1                           |  |
| Oxymetazoline HCl                | ADRA1A                         |  |
| DMXAA (Vadimezan)                | NQ01                           |  |
| Anacetrapib (MK-0859)            | CETP                           |  |
| AM1241                           | CNR2                           |  |
| Embelin                          | XIAP                           |  |
| Toremifene Citrate               | ESR                            |  |
| GSK2656157                       | EIF2AK3                        |  |
| Felodipine                       | CACNA1C                        |  |
| (+)-Bicuculline                  | GABR, KCNMA1                   |  |
| Ticlopidine HCl                  | P2RY                           |  |
| SANT-1                           | SMO                            |  |
| Ispinesib (SB-715992)            | 0                              |  |
| BTZ043 Racemate                  | 0                              |  |
| AZD7762                          | CHEK1, CHEK2                   |  |
| AVL-292                          | BTK                            |  |
| Pimobendan                       | PDE3                           |  |
| DBeQ                             | VCP                            |  |
| Formoterol Hemifumarate          | ADRB2                          |  |
| CNX-774                          | BTK                            |  |
| Lovastatin                       | HMGCR                          |  |
| Lafutidine                       | HRH2                           |  |
| AZ191                            | DYRK1B                         |  |
| JSH-23                           | NFKB                           |  |

|                                                       |                                     |  |
|-------------------------------------------------------|-------------------------------------|--|
| Pramipexole                                           | DRD2S,DRD2L, DRD3, DRD4             |  |
| RepSox                                                | TGFBR1                              |  |
| Bazedoxifene HCl                                      | ESR1, ESR2                          |  |
| Golgicide A                                           | GBF1                                |  |
| LDE225 (NVP-LDE225,Erismodegib)                       | SMO                                 |  |
| Ridaforolimus (Deforolimus, MK-8669)                  | MTOR                                |  |
| LY2784544                                             | JAK2                                |  |
| SNS-314 Mesylate                                      | AURKA, AURKB, AURKC                 |  |
| BGJ398 (NVP-BGJ398)                                   | FGFR1, FGFR2, FGFR3                 |  |
| Irinotecan                                            | TOP1                                |  |
| OSI-420                                               | EGFR                                |  |
| Dutasteride                                           | SRD5A2, SRD5A1                      |  |
| Apigenin                                              | CYP2C9                              |  |
| Rigosertib (ON-01910)                                 | PLK1, PLK2                          |  |
| Forskolin                                             | ADCY4                               |  |
| Rolipram                                              | PDE4                                |  |
| Bupivacaine HCl                                       | ADCY4                               |  |
| UNC669                                                | L3MBTL1                             |  |
| Tioxolone                                             | CA1                                 |  |
| PF-4708671                                            | RPS6KB1                             |  |
| 5-hydroxymethyl Tolterodine (PNU 200577, 5-HMT, 5-HM) | CHRM1                               |  |
| XAV-939                                               | WNT                                 |  |
| SB742457                                              | HTR6                                |  |
| Cinacalcet HCl                                        | CASR                                |  |
| Linagliptin                                           | DPP4                                |  |
| Etomidate                                             | GABR                                |  |
| Entacapone                                            | COMT                                |  |
| Moclobemide (Ro 111163)                               | MAOA                                |  |
| LY411575                                              | APP, NOTCH                          |  |
| GDC-0152                                              | XIAP, BIRC7, AP1, AP2               |  |
| OC000459                                              | PTGDR2                              |  |
| NLG919                                                | IDO1                                |  |
| Levosulpiride                                         | DRD2                                |  |
| Imatinib (STI571)                                     | ABL1, KIT, PDGFR                    |  |
| DCC-2036 (Rebastinib)                                 | ABL1, SRC, LYN, FGR, HCK, KDR, FLT3 |  |
| XL335                                                 | NR1H4                               |  |
| Nilvadipine                                           | CACNA1C                             |  |
| CHIR-98014                                            | GSK3A, GSK3B                        |  |
| GW4064                                                | NR1H4                               |  |
| PF-5274857                                            | SMO                                 |  |



|                              |                                                                                                                           |  |
|------------------------------|---------------------------------------------------------------------------------------------------------------------------|--|
| GDC-0068                     | AKT1, AKT2, AKT3                                                                                                          |  |
| JNJ-1661010                  | FAAH                                                                                                                      |  |
| VU 0364770                   | GRM4                                                                                                                      |  |
| U-104                        | CA12                                                                                                                      |  |
| Daunorubicin HCl             | TOP2                                                                                                                      |  |
| PF-562271                    | PTK2                                                                                                                      |  |
| AZD3463                      | ALK, IGFR1                                                                                                                |  |
| IOX2                         | EGLN1                                                                                                                     |  |
| IMD 0354                     | IKBKB, CHUK                                                                                                               |  |
| CRT0044876                   | APE1                                                                                                                      |  |
| TCID                         | UCHL3                                                                                                                     |  |
| LB42708                      | FNTA                                                                                                                      |  |
| Necrostatin-1                | RIPK1                                                                                                                     |  |
| Empagliflozin (BI 10773)     | SLC5A2                                                                                                                    |  |
| SU11274                      | MET                                                                                                                       |  |
| Bortezomib (PS-341)          | PSMC1                                                                                                                     |  |
| YM155 (Sepantronium Bromide) | BIRC5                                                                                                                     |  |
| Lenalidomide (CC-5013)       | TNF                                                                                                                       |  |
| AUY922 (NVP-AUY922)          | HSP90A, HSP90B                                                                                                            |  |
| Agomelatine                  | HTR2C                                                                                                                     |  |
| 17-AAG (Tanespimycin)        | HSP90                                                                                                                     |  |
| SP600125                     | JKAMP, MAPK9, MAPK10;<br>MAP2K4; MAP2K3,<br>MAP2K6, AKT1, PRKC;<br>MAPK1, MAPK14, CHEK1,<br>EGFR                          |  |
| CEP-18770 (Delanzomib)       | PSMC1                                                                                                                     |  |
| Aprepitant                   | TACR1                                                                                                                     |  |
| Fluvoxamine maleate          | 0                                                                                                                         |  |
| Oligomycin A                 | ATPAF1                                                                                                                    |  |
| Ginkgolide A                 | GABR                                                                                                                      |  |
| Cryptotanshinone             | STAT3                                                                                                                     |  |
| ICG-001                      | WNT                                                                                                                       |  |
| Stattic                      | STAT3                                                                                                                     |  |
| SC144                        | IL6ST                                                                                                                     |  |
| SRPIN340                     | SRPK1                                                                                                                     |  |
| Trelagliptin                 | DPP4                                                                                                                      |  |
| Panobinostat (LBH589)        | HDAC                                                                                                                      |  |
| VX-680 (Tozasertib, MK-0457) | AURKA                                                                                                                     |  |
| GDC-0941                     | PIK3CA, PIK3CD                                                                                                            |  |
| OSU-03012 (AR-12)            | PDK1                                                                                                                      |  |
| 0                            | Akt1, PKC $\eta$ , PKC $\theta$ , PrkX,<br>Akt3, Akt2, PKC $\delta$ , PKC $\beta$ ,<br>PKC $\epsilon$ , PKA, PKG1 $\beta$ |  |

|                                 |                     |  |
|---------------------------------|---------------------|--|
| Everolimus (RAD001)             | MTOR                |  |
| MK-8245                         | SCD                 |  |
| Aniracetam                      | GRIA1,              |  |
| Doxazosin Mesylate              | ADRA1A              |  |
| Ginkgolide B                    | PTAFR               |  |
| Tosedostat (CHR2797)            | LAP3, NPEPPS, ANPEP |  |
| Rebamipide                      | CCKAR               |  |
| Rasagiline Mesylate             | MAOB                |  |
| PD128907 HCl                    | DDR3                |  |
| Apatinib                        | KDR                 |  |
| ADX-47273                       | GRM5                |  |
| AZ 3146                         | TTK, CENPE          |  |
| VU 0357121                      | GRM5                |  |
| (-)-MK 801 Maleate              | GRIN                |  |
| Mirabegron                      | ADRB3               |  |
| AP26113                         | ALK                 |  |
| Birinapant                      | DIABLO (AP1)        |  |
| AZD1981                         | PTGDR2              |  |
| LDK378                          | ALK                 |  |
| (S)-crizotinib                  | NUDT1               |  |
| ZM 447439                       | AURKA, AURKB        |  |
| BX-912                          | PDK1                |  |
| Tadalafil                       | PDE5                |  |
| Elvitegravir (GS-9137, JTK-303) | 0                   |  |
| Fostamatinib (R788)             | SYK                 |  |
| GSK J4 HCl                      | KDM6A, KDM6B        |  |
| TCS 359                         | FLT3                |  |
| Carvedilol                      | ADRB1               |  |
| Naftopidil                      | ADRA1A              |  |
| ML133 HCl                       | KCNJ2               |  |
| T0070907                        | PPARG               |  |
| Gliquidone                      | KCNJ                |  |
| SC-514                          | IKBKB               |  |
| ZCL278                          | CDC42               |  |
| Caffeic Acid Phenethyl Ester    | NFKB                |  |
| VU 0364439                      | GRM4                |  |
| SB431542                        | TGFBR1              |  |
| Odanacatib (MK-0822)            | CTSK                |  |
| Celecoxib                       | PTGS2               |  |
| Etodolac                        | PTGS1               |  |
| Isotretinoin                    | 0                   |  |

|                                                       |                                            |  |
|-------------------------------------------------------|--------------------------------------------|--|
| Stavudine (d4T)                                       | 0                                          |  |
| VX-745                                                | MAPK14                                     |  |
| GSK429286A                                            | ROCK1, ROCK2                               |  |
| SB408124                                              | HCRTR1                                     |  |
| H 89 2HCl                                             | PRKAC                                      |  |
| Mubritinib (TAK 165)                                  | ERBB2                                      |  |
| BMS-378806                                            | CD4                                        |  |
| Ki16198                                               | LPAR1, LPAR3                               |  |
| AZ20                                                  | ATR                                        |  |
| AMG-517                                               | TRPV1                                      |  |
| NMS-873                                               | VCP                                        |  |
| Sorafenib                                             | RAF1, BRAF, KDR                            |  |
| NH125                                                 | EEF2K, PRKC, PRKA, CAMK2, Histidine Kinase |  |
| Sal003                                                | EIF2A                                      |  |
| Tariquidar                                            | ABCB1                                      |  |
| Lomeguatrib                                           | MGMT                                       |  |
| BI 2536                                               | PLK1, PLK2, PLK3                           |  |
| Imidapril HCl                                         | ACE                                        |  |
| GSK461364                                             | PLK1, PLK2, PLK3                           |  |
| Gliclazide                                            | KCNJ                                       |  |
| Sotrastaurin                                          | PRKC (especially PRKCQ; inactive to PRKCZ) |  |
| BI-D1870                                              | RPS6KA1, RPS6KA2, RPS6KA3, RPS6KA4         |  |
| Go 6983                                               | PRKCA, PRKCB, PRKCG, PRKCD                 |  |
| MNS (3,4-Methylenedioxy- $\beta$ -nitrostyrene, MDBN) | SYK, SRC, VCP                              |  |

**PDTX R05**

| <b>T2</b>                     |                                                                                                                    | <b>T6</b>                            |                              |
|-------------------------------|--------------------------------------------------------------------------------------------------------------------|--------------------------------------|------------------------------|
| <b>414 compounds</b>          |                                                                                                                    | <b>35 compounds</b>                  |                              |
| <b>Compound</b>               | <b>Target</b>                                                                                                      | <b>Compound</b>                      | <b>Target</b>                |
| FG-4592                       | EPAS1, EPO                                                                                                         | Tenofovir Disoproxil Fumarate        | 0                            |
| Rizatriptan Benzoate          | HTR1A                                                                                                              | Belinostat (PXD101)                  | HDAC                         |
| Fulvestrant                   | ESR                                                                                                                | NSC 319726                           | TP53 (R175)                  |
| Tolfenamic Acid               | PTGS2                                                                                                              | STF-118804                           | NAMPT                        |
| Ramelteon                     | MTNR1A, MTNR1B                                                                                                     | ABT-263 (Navitoclax)                 | BCL2, BCL2L1, BCL2L2         |
| Trospium chloride             | CHRM1                                                                                                              | Ganetespib (STA-9090)                | HSP90                        |
| Granisetron HCl               | HTR3A                                                                                                              | Ruxolitinib (INCB018424)             | JAK1, JAK2                   |
| A-769662                      | PRKAA1                                                                                                             | Tofacitinib (CP-690550, Tasocitinib) | JAK3                         |
| Losartan Potassium (DuP 753)  | AGTR                                                                                                               | PHA-793887                           | CDK2, CDK5, CDK7             |
| Tolazoline HCl                | ADRA1A                                                                                                             | KPT-185                              | XPO1                         |
| Tenofovir Disoproxil Fumarate | 0                                                                                                                  | MK-1775                              | WEE1                         |
| Ataluren (PTC124)             | CFTR                                                                                                               | Ouabain                              | ATP1B                        |
| Candesartan                   | AGTR                                                                                                               | KX2-391                              | SRC                          |
| Belinostat (PXD101)           | HDAC                                                                                                               | Crenolanib (CP-868596)               | PDGFRA, PDGFRB, FLT3 (D842V) |
| Semagacestat (LY450139)       | APP, NOTCH                                                                                                         | CHIR-124                             | CHEK1                        |
| NVP-ADW742                    | IGFR1                                                                                                              | Trichostatin A (TSA)                 | ALL HDACS (Except HDAC8)     |
| NSC 319726                    | TP53 (R175)                                                                                                        | AZD7762                              | CHEK1, CHEK2                 |
| Icotinib                      | EGFR                                                                                                               | DBeQ                                 | VCP                          |
| Ilomastat (GM6001, Galardin)  | MMP1, MMP2, MMP3, MMP7, MMP8, MMP9, MMP12, MMP14, MMP26                                                            | Bortezomib (PS-341)                  | PSMC1                        |
| Rivaroxaban                   | F10                                                                                                                | YM155 (Sepantronium Bromide)         | BIRC5                        |
| STF-118804                    | NAMPT                                                                                                              | AUY922 (NVP-AUY922)                  | HSP90A, HSP90B               |
| Rimonabant                    | CNR1                                                                                                               | 17-AAG (Tanespimycin)                | HSP90                        |
| FLI-06                        | NOTCH                                                                                                              | CEP-18770 (Delanzomib)               | PSMC1                        |
| Sitaxentan sodium             | EDNRA                                                                                                              | Oligomycin A                         | ATPAF1                       |
| ABT-263 (Navitoclax)          | BCL2, BCL2L1, BCL2L2                                                                                               | Stattic                              | STAT3                        |
| Brinzolamide                  | CA2                                                                                                                | SC144                                | IL6ST                        |
| Tandutinib (MLN518)           | FLT3, PDGFR KIT                                                                                                    | Rasagiline Mesylate                  | MAOB                         |
| Zebularine                    | DNMT1, DNMT3A, DNMT3B                                                                                              | (S)-crizotinib                       | NUDT1                        |
| MLN8054                       | AURKA                                                                                                              | GSK J4 HCl                           | KDM6A, KDM6B                 |
| PR-619                        | ATXN7L3, BAP1, OTUB1, OTUD1, OTUD6A, OTUDB7A, UBB, UCHL3, USP1, USP2, USP4, USP5, USP7, USP8, USP14, USP15, USP17, | Caffeic Acid Phenethyl Ester         | NFKB                         |

|                                          |                              |              |                                                  |
|------------------------------------------|------------------------------|--------------|--------------------------------------------------|
|                                          | USP26, USP30, USP36,<br>YOD1 |              |                                                  |
| Roxatidine Acetate HCl                   | HRH2                         | AZ20         | ATR                                              |
| GSK1904529A                              | IGFR1, INSR                  | NMS-873      | VCP                                              |
| Atorvastatin Calcium                     | HMGCR                        | GSK461364    | PLK1, PLK2, PLK3                                 |
| SNS-032 (BMS-387032)                     | CDK2                         | Sotrastaurin | PRKC (especially<br>PRKCQ; inactive to<br>PRKCZ) |
| Naltrexone HCl                           | OPRK1, OPRM1, OPRD1          | BI-D1870     | RPS6KA1,<br>RPS6KA2,<br>RPS6KA3,<br>RPS6KA4      |
| Ganetespib (STA-9090)                    | HSP90                        |              |                                                  |
| CGS 21680 HCl                            | ADORA2A                      |              |                                                  |
| Pancuronium dibromide                    | 0                            |              |                                                  |
| Loratadine                               | HRH1                         |              |                                                  |
| PNU-120596                               | 0                            |              |                                                  |
| Ruxolitinib (INCB018424)                 | JAK1, JAK2                   |              |                                                  |
| GW3965 HCl                               | NR1H3, NR1H2                 |              |                                                  |
| AZD6482                                  | PIK3CB                       |              |                                                  |
| SB705498                                 | TRPV1                        |              |                                                  |
| Safinamide Mesylate                      | MAOB, MAOA                   |              |                                                  |
| Tenofovir                                | 0                            |              |                                                  |
| P22077                                   | USP7, USP47                  |              |                                                  |
| Aloxistatin                              | 0                            |              |                                                  |
| NSC697923                                | UBE2                         |              |                                                  |
| Apixaban                                 | F10                          |              |                                                  |
| ML347                                    | ACVR1, ACVRL1                |              |                                                  |
| Irinotecan HCl Trihydrate                | TOP1                         |              |                                                  |
| SSR128129E                               | FGFR1                        |              |                                                  |
| VX-765                                   | CASP1                        |              |                                                  |
| Ferrostatin-1 (Fer-1)                    | VDAC                         |              |                                                  |
| PF-3845                                  | FAAH                         |              |                                                  |
| OTX015                                   | BRD2, BRD3, BRD4             |              |                                                  |
| Ibrutinib (PCI-32765)                    | BTK                          |              |                                                  |
| 4E1RCat                                  | EIF4E                        |              |                                                  |
| Tofacitinib (CP-<br>690550, Tasocitinib) | JAK3                         |              |                                                  |
| PHA-793887                               | CDK2, CDK5, CDK7             |              |                                                  |
| WZ811                                    | CXCR4                        |              |                                                  |
| Allopurinol                              | HCRTR1, HCRTR2               |              |                                                  |
| HC-030031                                | TRPA1                        |              |                                                  |
| Telmisartan                              | AGTR                         |              |                                                  |
| Mozavaptan                               | AVPR1, AVPR2                 |              |                                                  |
| Cyproterone Acetate                      | AR                           |              |                                                  |
| Sodium 4-Aminosalicylate                 | NFKB                         |              |                                                  |

|                                     |                              |  |
|-------------------------------------|------------------------------|--|
| GSK1292263                          | GPR119                       |  |
| SGC 0946                            | DOT1L                        |  |
| LY2157299                           | TGFBR1                       |  |
| IPA-3                               | PAK1                         |  |
| Esomeprazole Sodium                 | ATP4A                        |  |
| DMH1                                | ACVR1                        |  |
| Ozagrel                             | TBXA2R                       |  |
| AZD4547                             | FGFR1, FGFR2, FGFR3          |  |
| GW9508                              | FFAR1, FFAR4                 |  |
| VE-821                              | ATR                          |  |
| NSC 405020                          | MMP14                        |  |
| GNF-2                               | ABL1                         |  |
| TPCA-1                              | IKBKB                        |  |
| T0901317                            | NR1H3, NR1H2, NR1H4          |  |
| PD0325901                           | MAP2K1, MAP2K2               |  |
| PYR-41                              | UBA1                         |  |
| U0126-EtOH                          | MAP2K1, MAP2K2               |  |
| C646                                | EP300                        |  |
| Oxcarbazepine                       | SCN                          |  |
| Mdivi-1                             | DRP1, DNM1                   |  |
| MRS 2578                            | P2RY6                        |  |
| AGI-5198                            | IDH1                         |  |
| LY2603618                           | CHEK1                        |  |
| BTB06584                            | ATP5A1                       |  |
| NPS-2143                            | CASR                         |  |
| Veliparib (ABT-888)                 | PARP1, PARP2                 |  |
| Dalcatrapib (JTT-705,<br>RO4607381) | CETP                         |  |
| Vandetanib (ZD6474)                 | KDR                          |  |
| Istradefylline                      | ADORA2A                      |  |
| Iniparib (BSI-201)                  | PARP1                        |  |
| Dabrafenib (GSK2118436)             | BRAF (V600)                  |  |
| Finasteride                         | SRD5A2                       |  |
| Tyrphostin AG 879                   | ERBB2                        |  |
| Cilomilast                          | PDE4                         |  |
| TAE226 (NVP-TAE226)                 | PTK2, PTK2B                  |  |
| Ozagrel HCl                         | TBXAS1                       |  |
| Vildagliptin (LAF-237)              | DPP4                         |  |
| Dynasore                            | DNM1, DNM2                   |  |
| Piceatannol                         | SYK                          |  |
| Quizartinib (AC220)                 | FLT3                         |  |
| Tenovin-6                           | TP53, SIRT2, SIRT1,<br>SIRT3 |  |

|                        |                                 |  |
|------------------------|---------------------------------|--|
| Enzastaurin (LY317615) | PRKCB, PRKCA, PRKCG,<br>PRKCE   |  |
| CGP 57380              | MKNK1                           |  |
| Bisoprolol fumarate    | ADRB1                           |  |
| Bosutinib (SKI-606)    | SRC, ABL1                       |  |
| S3I-201                | STAT3                           |  |
| HA14-1                 | BCL2                            |  |
| ADL5859 HCl            | OPRK1, OPRM1                    |  |
| Voriconazole           | CYP51A1                         |  |
| BIBR 1532              | TERT                            |  |
| Thiazovivin            | ROCK1, ROCK2                    |  |
| Anastrozole            | CYP19A1                         |  |
| SB743921               | 0                               |  |
| EUK 134                | SOD1                            |  |
| Bergenin               | 0                               |  |
| SN-38                  | TOP1                            |  |
| CP-91149               | PYGL, PYGM, PYGB                |  |
| Wnt-C59 (C59)          | WNT3A                           |  |
| NU7026                 | PRKDC                           |  |
| BAM7                   | BAX                             |  |
| ZM 306416              | FLT1                            |  |
| (+)-JQ1                | BRD4                            |  |
| GW9662                 | PPARG                           |  |
| KPT-185                | XPO1                            |  |
| Pifithrin- $\mu$       | TP53, HSPBP1                    |  |
| Batimastat (BB-94)     | MMP1, MMP2, MMP3,<br>MMP7, MMP9 |  |
| Sertraline HCl         | 0                               |  |
| OG-L002                | KDM1A                           |  |
| MK-1775                | WEE1                            |  |
| Costunolide            | TERT                            |  |
| AT101                  | BCL2, BCL2L1, MCL1              |  |
| GSK690693              | AKT1, AKT2, AKT3                |  |
| Tropicamide            | CHRM4                           |  |
| BMS-707035             | 0                               |  |
| Raltegravir (MK-0518)  | 0                               |  |
| EX 527 (Selisistat)    | SIRT1                           |  |
| CCT128930              | AKT2                            |  |
| Pomalidomide           | TNF                             |  |
| Tie2 kinase inhibitor  | TEK                             |  |
| Ouabain                | ATP1B                           |  |
| Ranitidine             | HRH2                            |  |
| SKI II                 | S1PR                            |  |

|                              |                              |  |
|------------------------------|------------------------------|--|
| Fluvastatin Sodium           | HMGCR                        |  |
| Propranolol HCl              | ADRB1                        |  |
| Erastin                      | VDAC                         |  |
| Ifenprodil Tartrate          | GRIN                         |  |
| KPT-276                      | XPO1                         |  |
| AZD2461                      | PARP                         |  |
| KPT-330                      | XPO1                         |  |
| AGI-6780                     | IDH2                         |  |
| SGI-1027                     | DNMT1, DNMT3A,<br>DNMT3B     |  |
| Atglistatin                  | PNPLA2                       |  |
| Suvorexant (MK-4305)         | HCRTR1, HCRTR2               |  |
| SRT1720                      | SIRT1                        |  |
| 4EGI-1                       | EIF4E                        |  |
| Exemestane                   | CYP19A1                      |  |
| NSC 23766                    | RAC                          |  |
| 2-Methoxyestradiol (2-MeOE2) | HIF1A                        |  |
| Palbociclib (PD-0332991) HCl | CDK4, CDK6                   |  |
| EHop-016                     | RAC1, RAC3                   |  |
| PF-573228                    | PTK2                         |  |
| ABT-199 (GDC-0199)           | BCL2                         |  |
| PTC-209                      | BMI1                         |  |
| Trimebutine                  | OPRK1, OPRM1, OPRD1          |  |
| CK-636                       | ARPC2, ARPC3                 |  |
| SGI-1776 free base           | PIM1, FLT3, GSG2             |  |
| AZD7545                      | PDK1, PDK2                   |  |
| URB597                       | FAAH                         |  |
| Pacritinib (SB1518)          | JAK2, FLT3                   |  |
| KX2-391                      | SRC                          |  |
| PluriSIn #1 (NSC 14613)      | SCD                          |  |
| Crenolanib (CP-868596)       | PDGFRA, PDGFRB, FLT3 (D842V) |  |
| Enzalutamide (MDV3100)       | AR                           |  |
| PFI-1 (PF-6405761)           | BRD4                         |  |
| Dapagliflozin                | SLC5A2                       |  |
| Maraviroc                    | CCR5                         |  |
| Nebivolol                    | ADRB1                        |  |
| I-BET151 (GSK1210151A)       | BRD2, BRD3, BRD4             |  |
| Apoptosis Activator 2        | CASP3                        |  |
| Naproxen                     | PTGS1, PTGS2                 |  |
| Bosentan Hydrate             | EDNRA, EDNRB                 |  |
| Acadesine                    | PRKAA1                       |  |



|                                    |                                |  |
|------------------------------------|--------------------------------|--|
| E-64                               | CTSK                           |  |
| Captopril                          | ACE                            |  |
| Selumetinib (AZD6244)              | MAP2K1, MAPK3, MAPK1           |  |
| Tolvaptan                          | AVPR2                          |  |
| PD184352 (CI-1040)                 | MAP2K1, MAP2K2                 |  |
| OSI-906 (Linsitinib)               | IGFR1, INSR                    |  |
| Canagliflozin                      | SLC5A2                         |  |
| CP-673451                          | PDGFRA, PDGFRB                 |  |
| Sirtinol                           | SIRT1, SIRT2                   |  |
| Methotrexate                       | DHFR                           |  |
| SAR131675                          | FLT4                           |  |
| Pralatrexate                       | DHFR                           |  |
| BML-190                            | CNR2                           |  |
| TWS119                             | GSK3B                          |  |
| IKK-16 (IKK Inhibitor VII)         | IKBKB, CHUK                    |  |
| Triamterene                        | SCN                            |  |
| Clemastine Fumarate                | HRH1                           |  |
| Fingolimod (FTY720) HCl            | S1PR                           |  |
| Amlodipine                         | CACNA1C                        |  |
| PP2                                | SRC                            |  |
| CHIR-124                           | CHEK1                          |  |
| Temsirolimus (CCI-779, NSC 683864) | MTOR                           |  |
| YO-01027                           | APP, APPL1, NOTCH              |  |
| Trichostatin A (TSA)               | ALL HDACS (Except HDAC8)       |  |
| PAC-1                              | CASP3                          |  |
| PHA-665752                         | MET                            |  |
| VE-822                             | ATR                            |  |
| SB203580                           | MAPK11, MAPK12, MAPK13, MAPK14 |  |
| EPZ-6438                           | EZH2                           |  |
| KU-55933 (ATM Kinase Inhibitor)    | ATM                            |  |
| CGK 733                            | ATM, ATR                       |  |
| WZ4002                             | EGFR                           |  |
| WZ4003                             | NUAK1, NUAK2                   |  |
| TAK-700 (Orteronel)                | CYP17A1                        |  |
| Loxistatin Acid (E-64C)            | 0                              |  |
| Zibotentan (ZD4054)                | EDNRA                          |  |
| Pyrimethamine                      | DHFR                           |  |
| RKI-1447                           | ROCK1, ROCK2                   |  |
| UNC2250                            | MERTK                          |  |
| SMI-4a                             | PIM1                           |  |

|                                 |                                |  |
|---------------------------------|--------------------------------|--|
| SB415286                        | GSK3A                          |  |
| PRT062607 (P505-15, BIB057) HCl | SYK                            |  |
| Torcetrapib                     | CETP                           |  |
| MK-2206 2HCl                    | AKT1, AKT2, AKT3               |  |
| ML130 (Nodinitib-1)             | NOD1                           |  |
| PF-04217903                     | MET                            |  |
| Varespladib (LY315920)          | PLA2G2A                        |  |
| ML161                           | PARP1                          |  |
| MK-2866 (GTx-024)               | AR                             |  |
| Ticagrelor                      | P2RY12                         |  |
| Letrozole                       | CYP19A1                        |  |
| GW2580                          | CSF1R                          |  |
| Zosuquidar (LY335979) 3HCl      | ABCB1                          |  |
| KU-60019                        | ATM                            |  |
| LY2228820                       | MAPK11, MAPK12, MAPK13, MAPK14 |  |
| MLN2238                         | PSMC1                          |  |
| Org 27569                       | CNR1                           |  |
| Oxymetazoline HCl               | ADRA1A                         |  |
| DMXAA (Vadimezan)               | NQ01                           |  |
| Anacetrapib (MK-0859)           | CETP                           |  |
| AM1241                          | CNR2                           |  |
| Embelin                         | XIAP                           |  |
| Toremifene Citrate              | ESR                            |  |
| GSK2656157                      | EIF2AK3                        |  |
| Felodipine                      | CACNA1C                        |  |
| (+)-Bicuculline                 | GABR, KCNMA1                   |  |
| Ticlopidine HCl                 | P2RY                           |  |
| SANT-1                          | SMO                            |  |
| Ispinesib (SB-715992)           | 0                              |  |
| BTZ043 Racemate                 | 0                              |  |
| AZD7762                         | CHEK1, CHEK2                   |  |
| AVL-292                         | BTK                            |  |
| Pimobendan                      | PDE3                           |  |
| DBeQ                            | VCP                            |  |
| Formoterol Hemifumarate         | ADRB2                          |  |
| CNX-774                         | BTK                            |  |
| Lovastatin                      | HMGCR                          |  |
| Lafutidine                      | HRH2                           |  |
| AZ191                           | DYRK1B                         |  |
| JSH-23                          | NFKB                           |  |

|                                                       |                                     |  |
|-------------------------------------------------------|-------------------------------------|--|
| Pramipexole                                           | DRD2S,DRD2L, DRD3, DRD4             |  |
| RepSox                                                | TGFBR1                              |  |
| Bazedoxifene HCl                                      | ESR1, ESR2                          |  |
| Golgicide A                                           | GBF1                                |  |
| LDE225 (NVP-LDE225,Erismodegib)                       | SMO                                 |  |
| Ridaforolimus (Deforolimus, MK-8669)                  | MTOR                                |  |
| LY2784544                                             | JAK2                                |  |
| SNS-314 Mesylate                                      | AURKA, AURKB, AURKC                 |  |
| BGJ398 (NVP-BGJ398)                                   | FGFR1, FGFR2, FGFR3                 |  |
| Irinotecan                                            | TOP1                                |  |
| OSI-420                                               | EGFR                                |  |
| Dutasteride                                           | SRD5A2, SRD5A1                      |  |
| Apigenin                                              | CYP2C9                              |  |
| Rigosertib (ON-01910)                                 | PLK1, PLK2                          |  |
| Forskolin                                             | ADCY4                               |  |
| Rolipram                                              | PDE4                                |  |
| Bupivacaine HCl                                       | ADCY4                               |  |
| UNC669                                                | L3MBTL1                             |  |
| Tioxolone                                             | CA1                                 |  |
| PF-4708671                                            | RPS6KB1                             |  |
| 5-hydroxymethyl Tolterodine (PNU 200577, 5-HMT, 5-HM) | CHRM1                               |  |
| XAV-939                                               | WNT                                 |  |
| SB742457                                              | HTR6                                |  |
| Cinacalcet HCl                                        | CASR                                |  |
| Linagliptin                                           | DPP4                                |  |
| Etomidate                                             | GABR                                |  |
| Entacapone                                            | COMT                                |  |
| Moclobemide (Ro 111163)                               | MAOA                                |  |
| LY411575                                              | APP, NOTCH                          |  |
| GDC-0152                                              | XIAP, BIRC7, AP1, AP2               |  |
| OC000459                                              | PTGDR2                              |  |
| NLG919                                                | IDO1                                |  |
| Levosulpiride                                         | DRD2                                |  |
| Imatinib (STI571)                                     | ABL1, KIT, PDGFR                    |  |
| DCC-2036 (Rebastinib)                                 | ABL1, SRC, LYN, FGR, HCK, KDR, FLT3 |  |
| XL335                                                 | NR1H4                               |  |
| Nilvadipine                                           | CACNA1C                             |  |
| CHIR-98014                                            | GSK3A, GSK3B                        |  |
| GW4064                                                | NR1H4                               |  |
| PF-5274857                                            | SMO                                 |  |

|                              |                                                                                                                           |  |
|------------------------------|---------------------------------------------------------------------------------------------------------------------------|--|
| GDC-0068                     | AKT1, AKT2, AKT3                                                                                                          |  |
| JNJ-1661010                  | FAAH                                                                                                                      |  |
| VU 0364770                   | GRM4                                                                                                                      |  |
| U-104                        | CA12                                                                                                                      |  |
| Daunorubicin HCl             | TOP2                                                                                                                      |  |
| PF-562271                    | PTK2                                                                                                                      |  |
| AZD3463                      | ALK, IGFR1                                                                                                                |  |
| IOX2                         | EGLN1                                                                                                                     |  |
| IMD 0354                     | IKBKB, CHUK                                                                                                               |  |
| CRT0044876                   | APE1                                                                                                                      |  |
| TCID                         | UCHL3                                                                                                                     |  |
| LB42708                      | FNTA                                                                                                                      |  |
| Necrostatin-1                | RIPK1                                                                                                                     |  |
| Empagliflozin (BI 10773)     | SLC5A2                                                                                                                    |  |
| SU11274                      | MET                                                                                                                       |  |
| Bortezomib (PS-341)          | PSMC1                                                                                                                     |  |
| YM155 (Sepantronium Bromide) | BIRC5                                                                                                                     |  |
| Lenalidomide (CC-5013)       | TNF                                                                                                                       |  |
| AUY922 (NVP-AUY922)          | HSP90A, HSP90B                                                                                                            |  |
| Agomelatine                  | HTR2C                                                                                                                     |  |
| 17-AAG (Tanespimycin)        | HSP90                                                                                                                     |  |
| SP600125                     | JKAMP, MAPK9, MAPK10;<br>MAP2K4; MAP2K3,<br>MAP2K6, AKT1, PRKC;<br>MAPK1, MAPK14, CHEK1,<br>EGFR                          |  |
| CEP-18770 (Delanzomib)       | PSMC1                                                                                                                     |  |
| Aprepitant                   | TACR1                                                                                                                     |  |
| Fluvoxamine maleate          | 0                                                                                                                         |  |
| Oligomycin A                 | ATPAF1                                                                                                                    |  |
| Ginkgolide A                 | GABR                                                                                                                      |  |
| Cryptotanshinone             | STAT3                                                                                                                     |  |
| ICG-001                      | WNT                                                                                                                       |  |
| Stattic                      | STAT3                                                                                                                     |  |
| SC144                        | IL6ST                                                                                                                     |  |
| SRPIN340                     | SRPK1                                                                                                                     |  |
| Trelagliptin                 | DPP4                                                                                                                      |  |
| Panobinostat (LBH589)        | HDAC                                                                                                                      |  |
| VX-680 (Tozasertib, MK-0457) | AURKA                                                                                                                     |  |
| GDC-0941                     | PIK3CA, PIK3CD                                                                                                            |  |
| OSU-03012 (AR-12)            | PDK1                                                                                                                      |  |
| 0                            | Akt1, PKC $\eta$ , PKC $\theta$ , PrkX,<br>Akt3, Akt2, PKC $\delta$ , PKC $\beta$ ,<br>PKC $\epsilon$ , PKA, PKG1 $\beta$ |  |

|                                 |                     |  |
|---------------------------------|---------------------|--|
| Everolimus (RAD001)             | MTOR                |  |
| MK-8245                         | SCD                 |  |
| Aniracetam                      | GRIA1,              |  |
| Doxazosin Mesylate              | ADRA1A              |  |
| Ginkgolide B                    | PTAFR               |  |
| Tosedostat (CHR2797)            | LAP3, NPEPPS, ANPEP |  |
| Rebamipide                      | CCKAR               |  |
| Rasagiline Mesylate             | MAOB                |  |
| PD128907 HCl                    | DDR3                |  |
| Apatinib                        | KDR                 |  |
| ADX-47273                       | GRM5                |  |
| AZ 3146                         | TTK, CENPE          |  |
| VU 0357121                      | GRM5                |  |
| (-)-MK 801 Maleate              | GRIN                |  |
| Mirabegron                      | ADRB3               |  |
| AP26113                         | ALK                 |  |
| Birinapant                      | DIABLO (AP1)        |  |
| AZD1981                         | PTGDR2              |  |
| LDK378                          | ALK                 |  |
| (S)-crizotinib                  | NUDT1               |  |
| ZM 447439                       | AURKA, AURKB        |  |
| BX-912                          | PDK1                |  |
| Tadalafil                       | PDE5                |  |
| Elvitegravir (GS-9137, JTK-303) | 0                   |  |
| Fostamatinib (R788)             | SYK                 |  |
| GSK J4 HCl                      | KDM6A, KDM6B        |  |
| TCS 359                         | FLT3                |  |
| Carvedilol                      | ADRB1               |  |
| Naftopidil                      | ADRA1A              |  |
| ML133 HCl                       | KCNJ2               |  |
| T0070907                        | PPARG               |  |
| Gliquidone                      | KCNJ                |  |
| SC-514                          | IKBKB               |  |
| ZCL278                          | CDC42               |  |
| Caffeic Acid Phenethyl Ester    | NFKB                |  |
| VU 0364439                      | GRM4                |  |
| SB431542                        | TGFBR1              |  |
| Odanacatib (MK-0822)            | CTSK                |  |
| Celecoxib                       | PTGS2               |  |
| Etodolac                        | PTGS1               |  |
| Isotretinoin                    | 0                   |  |

|                      |                                             |  |
|----------------------|---------------------------------------------|--|
| Stavudine (d4T)      | 0                                           |  |
| VX-745               | MAPK14                                      |  |
| GSK429286A           | ROCK1, ROCK2                                |  |
| SB408124             | HCRTR1                                      |  |
| H 89 2HCl            | PRKAC                                       |  |
| Mubritinib (TAK 165) | ERBB2                                       |  |
| BMS-378806           | CD4                                         |  |
| Ki16198              | LPAR1, LPAR3                                |  |
| AZ20                 | ATR                                         |  |
| AMG-517              | TRPV1                                       |  |
| NMS-873              | VCP                                         |  |
| Sorafenib            | RAF1, BRAF, KDR                             |  |
| NH125                | EEF2K, PRKC, PRKA, CAMK2, Histidine Kinase  |  |
| Sal003               | EIF2A                                       |  |
| Tariquidar           | ABCB1                                       |  |
| Lomeguatrib          | MGMT                                        |  |
| BI 2536              | PLK1, PLK2, PLK3                            |  |
| Imidapril HCl        | ACE                                         |  |
| GSK461364            | PLK1, PLK2, PLK3                            |  |
| Gliclazide           | KCNJ                                        |  |
| Sotrastaurin         | PRKC (especiallly PRKCQ; inactive to PRKCZ) |  |
| BI-D1870             | RPS6KA1, RPS6KA2, RPS6KA3, RPS6KA4          |  |
| Go 6983              | PRKCA, PRKCB, PRKCG, PRKCD                  |  |

#### **PD TX R06**

| <b>T4</b>            |                       | <b>T7</b>                            |                      |
|----------------------|-----------------------|--------------------------------------|----------------------|
| <b>269 compounds</b> |                       | <b>25 compounds</b>                  |                      |
| <b>Compound</b>      | <b>Target</b>         | <b>Compound</b>                      | <b>Target</b>        |
| Rizatriptan Benzoate | HTR1A                 | Belinostat (PXD101)                  | HDAC                 |
| Tolfenamic Acid      | PTGS2                 | NSC 319726                           | TP53 (R175)          |
| Ramelteon            | MTNR1A, MTNR1B        | STF-118804                           | NAMPT                |
| Belinostat (PXD101)  | HDAC                  | ABT-263 (Navitoclax)                 | BCL2, BCL2L1, BCL2L2 |
| Rivaroxaban          | F10                   | Ganetespib (STA-9090)                | HSP90                |
| Rimonabant           | CNR1                  | Ruxolitinib (INCB018424)             | JAK1, JAK2           |
| FLI-06               | NOTCH                 | Tofacitinib (CP-690550, Tasocitinib) | JAK3                 |
| Sitaxentan sodium    | EDNRA                 | PHA-793887                           | CDK2, CDK5, CDK7     |
| Brinzolamide         | CA2                   | KPT-185                              | XPO1                 |
| Zebularine           | DNMT1, DNMT3A, DNMT3B | MK-1775                              | WEE1                 |
| MLN8054              | AURKA                 | Ouabain                              | ATP1B                |

|                                      |                                                                                                                                              |                              |                                            |
|--------------------------------------|----------------------------------------------------------------------------------------------------------------------------------------------|------------------------------|--------------------------------------------|
| PR-619                               | ATXN7L3, BAP1, OTUB1, OTUD1, OTUD6A, OTUDB7A, UBB, UCHL3, USP1, USP2, USP4, USP5, USP7, USP8, USP14, USP15, USP17, USP26, USP30, USP36, YOD1 | KX2-391                      | SRC                                        |
| Naltrexone HCl                       | OPRK1, OPRM1, OPRD1                                                                                                                          | Crenolanib (CP-868596)       | PDGFRA, PDGFRB, FLT3 (D842V)               |
| Ganetespib (STA-9090)                | HSP90                                                                                                                                        | CHIR-124                     | CHEK1                                      |
| Vemurafenib (PLX4032, RG7204)        | BRAF (V600E)                                                                                                                                 | Trichostatin A (TSA)         | ALL HDACS (Except HDAC8)                   |
| Pancuronium dibromide                | 0                                                                                                                                            | AZD7762                      | CHEK1, CHEK2                               |
| Loratadine                           | HRH1                                                                                                                                         | DBeQ                         | VCP                                        |
| PNU-120596                           | 0                                                                                                                                            | Bortezomib (PS-341)          | PSMC1                                      |
| GW3965 HCl                           | NR1H3, NR1H2                                                                                                                                 | YM155 (Sepantronium Bromide) | BIRC5                                      |
| AZD6482                              | PIK3CB                                                                                                                                       | AUY922 (NVP-AUY922)          | HSP90A, HSP90B                             |
| SB705498                             | TRPV1                                                                                                                                        | 17-AAG (Tanespimycin)        | HSP90                                      |
| Safinamide Mesylate                  | MAOB, MAOA                                                                                                                                   | CEP-18770 (Delanzomib)       | PSMC1                                      |
| Tenofovir                            | 0                                                                                                                                            | Oligomycin A                 | ATPAF1                                     |
| Apixaban                             | F10                                                                                                                                          | Stattic                      | STAT3                                      |
| ML347                                | ACVR1, ACVRL1                                                                                                                                | SC144                        | IL6ST                                      |
| Ferrostatin-1 (Fer-1)                | VDAC                                                                                                                                         | Rasagiline Mesylate          | MAOB                                       |
| Rotundine                            | DRD1                                                                                                                                         | (S)-crizotinib               | NUDT1                                      |
| MM-102                               | KANSL1                                                                                                                                       | GSK J4 HCl                   | KDM6A, KDM6B                               |
| OTX015                               | BRD2, BRD3, BRD4                                                                                                                             | Caffeic Acid Phenethyl Ester | NFKB                                       |
| Tofacitinib (CP-690550, Tasocitinib) | JAK3                                                                                                                                         | AZ20                         | ATR                                        |
| PHA-793887                           | CDK2, CDK5, CDK7                                                                                                                             | NMS-873                      | VCP                                        |
| Allopurinol                          | HCRTR1, HCRTR2                                                                                                                               | GSK461364                    | PLK1, PLK2, PLK3                           |
| HC-030031                            | TRPA1                                                                                                                                        | Sotrastaurin                 | PRKC (especially PRKCQ; inactive to PRKCZ) |
| Telmisartan                          | AGTR                                                                                                                                         | BI-D1870                     | RPS6KA1, RPS6KA2, RPS6KA3, RPS6KA4         |
| Cyproterone Acetate                  | AR                                                                                                                                           |                              |                                            |
| Sodium 4-Aminosalicylate             | NFKB                                                                                                                                         |                              |                                            |
| GSK1292263                           | GPR119                                                                                                                                       |                              |                                            |
| SGC 0946                             | DOT1L                                                                                                                                        |                              |                                            |
| LY2157299                            | TGFBR1                                                                                                                                       |                              |                                            |
| IPA-3                                | PAK1                                                                                                                                         |                              |                                            |
| Esomeprazole Sodium                  | ATP4A                                                                                                                                        |                              |                                            |
| DMH1                                 | ACVR1                                                                                                                                        |                              |                                            |
| Ozagrel                              | TBXA2R                                                                                                                                       |                              |                                            |
| GW9508                               | FFAR1, FFAR4                                                                                                                                 |                              |                                            |
| NSC 405020                           | MMP14                                                                                                                                        |                              |                                            |

|                                  |                              |  |
|----------------------------------|------------------------------|--|
| TPCA-1                           | IKBKB                        |  |
| PYR-41                           | UBA1                         |  |
| U0126-EtOH                       | MAP2K1, MAP2K2               |  |
| LDN-212854                       | ACVR1, ACVRL1                |  |
| Ki16425                          | LPAR1, LPAR2, LPAR3          |  |
| Mdivi-1                          | DRP1, DNM1                   |  |
| MRS 2578                         | P2RY6                        |  |
| LY2603618                        | CHEK1                        |  |
| BTB06584                         | ATP5A1                       |  |
| NPS-2143                         | CASR                         |  |
| Veliparib (ABT-888)              | PARP1, PARP2                 |  |
| Dalcetrapib (JTT-705, RO4607381) | CETP                         |  |
| Istradefylline                   | ADORA2A                      |  |
| Iniparib (BSI-201)               | PARP1                        |  |
| Dabrafenib (GSK2118436)          | BRAF (V600)                  |  |
| Tyrphostin AG 879                | ERBB2                        |  |
| Cilomilast                       | PDE4                         |  |
| TAE226 (NVP-TAE226)              | PTK2, PTK2B                  |  |
| Vildagliptin (LAF-237)           | DPP4                         |  |
| Dynasore                         | DNM1, DNM2                   |  |
| Piceatannol                      | SYK                          |  |
| Quizartinib (AC220)              | FLT3                         |  |
| Enzastaurin (LY317615)           | PRKCB, PRKCA, PRKCG, PRKCE   |  |
| HA14-1                           | BCL2                         |  |
| TG100-115                        | PIK3CG, PIK3CD               |  |
| BIBR 1532                        | TERT                         |  |
| Anastrozole                      | CYP19A1                      |  |
| SB743921                         | 0                            |  |
| EUK 134                          | SOD1                         |  |
| Bergenin                         | 0                            |  |
| CP-91149                         | PYGL, PYGM, PYGB             |  |
| Wnt-C59 (C59)                    | WNT3A                        |  |
| NU7026                           | PRKDC                        |  |
| BAM7                             | BAX                          |  |
| (+)-JQ1                          | BRD4                         |  |
| GW9662                           | PPARG                        |  |
| KPT-185                          | XPO1                         |  |
| Pifithrin- $\mu$                 | TP53, HSPBP1                 |  |
| Batimastat (BB-94)               | MMP1, MMP2, MMP3, MMP7, MMP9 |  |
| Sertraline HCl                   | 0                            |  |
| OG-L002                          | KDM1A                        |  |



|                        |                                 |  |
|------------------------|---------------------------------|--|
| MK-1775                | WEE1                            |  |
| AT101                  | BCL2, BCL2L1, MCL1              |  |
| Tropicamide            | CHRM4                           |  |
| BMS-707035             | 0                               |  |
| Raltegravir (MK-0518)  | 0                               |  |
| AS-252424              | PIK3CG                          |  |
| Tie2 kinase inhibitor  | TEK                             |  |
| Ouabain                | ATP1B                           |  |
| Ranitidine             | HRH2                            |  |
| Fluvastatin Sodium     | HMGCR                           |  |
| Propranolol HCl        | ADRB1                           |  |
| Erastin                | VDAC                            |  |
| Ifenprodil Tartrate    | GRIN                            |  |
| KPT-276                | XPO1                            |  |
| AZD2461                | PARP                            |  |
| KPT-330                | XPO1                            |  |
| AGI-6780               | IDH2                            |  |
| SGI-1027               | DNMT1, DNMT3A,<br>DNMT3B        |  |
| Atglistatin            | PNPLA2                          |  |
| Suvorexant (MK-4305)   | HCRTR1, HCRTR2                  |  |
| SRT1720                | SIRT1                           |  |
| Exemestane             | CYP19A1                         |  |
| NSC 23766              | RAC                             |  |
| EHop-016               | RAC1, RAC3                      |  |
| PF-573228              | PTK2                            |  |
| ABT-199 (GDC-0199)     | BCL2                            |  |
| Memantine HCl          | CYP2B6                          |  |
| Trimebutine            | OPRK1, OPRM1, OPRD1             |  |
| AZD7545                | PDK1, PDK2                      |  |
| URB597                 | FAAH                            |  |
| GW0742                 | PPARD                           |  |
| Pacritinib (SB1518)    | JAK2, FLT3                      |  |
| KX2-391                | SRC                             |  |
| Crenolanib (CP-868596) | PDGFRA, PDGFRB, FLT3<br>(D842V) |  |
| PFI-1 (PF-6405761)     | BRD4                            |  |
| Dapagliflozin          | SLC5A2                          |  |
| Maraviroc              | CCR5                            |  |
| Nebivolol              | ADRB1                           |  |
| E-64                   | CTSK                            |  |
| OSI-906 (Linsitinib)   | IGFR1, INSR                     |  |
| Canagliflozin          | SLC5A2                          |  |

|                                    |                                |  |
|------------------------------------|--------------------------------|--|
| Sirtinol                           | SIRT1, SIRT2                   |  |
| Methotrexate                       | DHFR                           |  |
| SAR131675                          | FLT4                           |  |
| Pralatrexate                       | DHFR                           |  |
| TWS119                             | GSK3B                          |  |
| IKK-16 (IKK Inhibitor VII)         | IKBKB, CHUK                    |  |
| Enalaprilat Dihydrate              | ACE                            |  |
| Triamterene                        | SCN                            |  |
| Clemastine Fumarate                | HRH1                           |  |
| Fingolimod (FTY720) HCl            | S1PR                           |  |
| PP2                                | SRC                            |  |
| CHIR-124                           | CHEK1                          |  |
| Temsirolimus (CCI-779, NSC 683864) | MTOR                           |  |
| Trichostatin A (TSA)               | ALL HDACS (Except HDAC8)       |  |
| PHA-665752                         | MET                            |  |
| CGK 733                            | ATM, ATR                       |  |
| WZ4002                             | EGFR                           |  |
| TAK-700 (Orteronel)                | CYP17A1                        |  |
| Loxistatin Acid (E-64C)            | 0                              |  |
| Zibotentan (ZD4054)                | EDNRA                          |  |
| Pyrimethamine                      | DHFR                           |  |
| RKI-1447                           | ROCK1, ROCK2                   |  |
| SMI-4a                             | PIM1                           |  |
| SB415286                           | GSK3A                          |  |
| Torcetrapib                        | CETP                           |  |
| MK-2206 2HCl                       | AKT1, AKT2, AKT3               |  |
| PF-04217903                        | MET                            |  |
| GW441756                           | NTRK1                          |  |
| Varespladib (LY315920)             | PLA2G2A                        |  |
| Ticagrelor                         | P2RY12                         |  |
| Letrozole                          | CYP19A1                        |  |
| GW2580                             | CSF1R                          |  |
| Zosuquidar (LY335979) 3HCl         | ABCB1                          |  |
| KU-60019                           | ATM                            |  |
| LY2228820                          | MAPK11, MAPK12, MAPK13, MAPK14 |  |
| Oxymetazoline HCl                  | ADRA1A                         |  |
| DMXAA (Vadimezan)                  | NQ01                           |  |
| Embelin                            | XIAP                           |  |
| Toremifene Citrate                 | ESR                            |  |
| GSK2656157                         | EIF2AK3                        |  |

|                                                             |                                        |  |
|-------------------------------------------------------------|----------------------------------------|--|
| Ticlopidine HCl                                             | P2RY                                   |  |
| SANT-1                                                      | SMO                                    |  |
| Ispinesib (SB-715992)                                       | 0                                      |  |
| BTZ043 Racemate                                             | 0                                      |  |
| AZD7762                                                     | CHEK1, CHEK2                           |  |
| AVL-292                                                     | BTK                                    |  |
| Pimobendan                                                  | PDE3                                   |  |
| DBeQ                                                        | VCP                                    |  |
| Formoterol Hemifumarate                                     | ADRB2                                  |  |
| Lovastatin                                                  | HMGCR                                  |  |
| Pramipexole                                                 | DRD2S, DRD2L, DRD3,<br>DRD4            |  |
| RepSox                                                      | TGFBR1                                 |  |
| Bazedoxifene HCl                                            | ESR1, ESR2                             |  |
| Golgicide A                                                 | GBF1                                   |  |
| LDE225 (NVP-<br>LDE225, Erismodegib)                        | SMO                                    |  |
| Ridaforolimus<br>(Deforolimus, MK-8669)                     | MTOR                                   |  |
| LY2784544                                                   | JAK2                                   |  |
| SNS-314 Mesylate                                            | AURKA, AURKB, AURKC                    |  |
| Irinotecan                                                  | TOP1                                   |  |
| Dutasteride                                                 | SRD5A2, SRD5A1                         |  |
| Apigenin                                                    | CYP2C9                                 |  |
| Forskolin                                                   | ADCY4                                  |  |
| Rolipram                                                    | PDE4                                   |  |
| Bupivacaine HCl                                             | ADCY4                                  |  |
| UNC669                                                      | L3MBTL1                                |  |
| Tioxolone                                                   | CA1                                    |  |
| PF-4708671                                                  | RPS6KB1                                |  |
| 5-hydroxymethyl<br>Tolterodine (PNU 200577,<br>5-HMT, 5-HM) | CHRM1                                  |  |
| XAV-939                                                     | WNT                                    |  |
| SB742457                                                    | HTR6                                   |  |
| Cinacalcet HCl                                              | CASR                                   |  |
| Linagliptin                                                 | DPP4                                   |  |
| Etomidate                                                   | GABR                                   |  |
| Entacapone                                                  | COMT                                   |  |
| LY411575                                                    | APP, NOTCH                             |  |
| OC000459                                                    | PTGDR2                                 |  |
| NLG919                                                      | IDO1                                   |  |
| Levosulpiride                                               | DRD2                                   |  |
| Imatinib (STI571)                                           | ABL1, KIT, PDGFR                       |  |
| DCC-2036 (Rebastinib)                                       | ABL1, SRC, LYN, FGR,<br>HCK, KDR, FLT3 |  |

|                              |                                                                                      |  |
|------------------------------|--------------------------------------------------------------------------------------|--|
| XL335                        | NR1H4                                                                                |  |
| Nilvadipine                  | CACNA1C                                                                              |  |
| CHIR-98014                   | GSK3A, GSK3B                                                                         |  |
| GW4064                       | NR1H4                                                                                |  |
| PF-5274857                   | SMO                                                                                  |  |
| GDC-0068                     | AKT1, AKT2, AKT3                                                                     |  |
| VU 0364770                   | GRM4                                                                                 |  |
| Daunorubicin HCl             | TOP2                                                                                 |  |
| PF-562271                    | PTK2                                                                                 |  |
| AZD3463                      | ALK, IGFR1                                                                           |  |
| IOX2                         | EGLN1                                                                                |  |
| IMD 0354                     | IKBKB, CHUK                                                                          |  |
| CRT0044876                   | APE1                                                                                 |  |
| TCID                         | UCHL3                                                                                |  |
| Necrostatin-1                | RIPK1                                                                                |  |
| Empagliflozin (BI 10773)     | SLC5A2                                                                               |  |
| SU11274                      | MET                                                                                  |  |
| Bortezomib (PS-341)          | PSMC1                                                                                |  |
| YM155 (Sepantronium Bromide) | BIRC5                                                                                |  |
| Lenalidomide (CC-5013)       | TNF                                                                                  |  |
| AUY922 (NVP-AUY922)          | HSP90A, HSP90B                                                                       |  |
| Agomelatine                  | HTR2C                                                                                |  |
| 17-AAG (Tanespimycin)        | HSP90                                                                                |  |
| SP600125                     | JKAMP, MAPK9, MAPK10; MAP2K4; MAP2K3, MAP2K6, AKT1, PRKC; MAPK1, MAPK14, CHEK1, EGFR |  |
| CEP-18770 (Delanzomib)       | PSMC1                                                                                |  |
| Aprepitant                   | TACR1                                                                                |  |
| Fluvoxamine maleate          | 0                                                                                    |  |
| Oligomycin A                 | ATPAF1                                                                               |  |
| Ginkgolide A                 | GABR                                                                                 |  |
| Cryptotanshinone             | STAT3                                                                                |  |
| ICG-001                      | WNT                                                                                  |  |
| SC144                        | IL6ST                                                                                |  |
| SRPIN340                     | SRPK1                                                                                |  |
| Panobinostat (LBH589)        | HDAC                                                                                 |  |
| VX-680 (Tozasertib, MK-0457) | AURKA                                                                                |  |
| Everolimus (RAD001)          | MTOR                                                                                 |  |
| MK-8245                      | SCD                                                                                  |  |
| Aniracetam                   | GRIA1,                                                                               |  |
| PD128907 HCl                 | DDR3                                                                                 |  |

|                      |                                               |  |
|----------------------|-----------------------------------------------|--|
| AP26113              | ALK                                           |  |
| Birinapant           | DIABLO (AP1)                                  |  |
| BX-912               | PDK1                                          |  |
| Tadalafil            | PDE5                                          |  |
| Fostamatinib (R788)  | SYK                                           |  |
| GSK J4 HCl           | KDM6A, KDM6B                                  |  |
| Carvedilol           | ADRB1                                         |  |
| SC-514               | IKBKB                                         |  |
| ZCL278               | CDC42                                         |  |
| Isotretinoin         | 0                                             |  |
| VX-745               | MAPK14                                        |  |
| GSK429286A           | ROCK1, ROCK2                                  |  |
| Mubritinib (TAK 165) | ERBB2                                         |  |
| BMS-378806           | CD4                                           |  |
| Ki16198              | LPAR1, LPAR3                                  |  |
| AZ20                 | ATR                                           |  |
| AMG-517              | TRPV1                                         |  |
| NMS-873              | VCP                                           |  |
| Sorafenib            | RAF1, BRAF, KDR                               |  |
| NH125                | EEF2K, PRKC, PRKA,<br>CAMK2, Histidine Kinase |  |
| BI 2536              | PLK1, PLK2, PLK3                              |  |
| GSK461364            | PLK1, PLK2, PLK3                              |  |
| BI-D1870             | RPS6KA1, RPS6KA2,<br>RPS6KA3, RPS6KA4         |  |

**Table S5. Viability of E4-ECs across the 433-drugs library.**

| Sample number | Compound ID                         | Target                   | Viability    |
|---------------|-------------------------------------|--------------------------|--------------|
| 345           | <i>YM155 (Sepantronium Bromide)</i> | <i>Survivin</i>          | <i>0.012</i> |
| 348           | <i>AUY922 (NVP-AUY922)</i>          | <i>HSP (e.g. HSP90)</i>  | <i>0.227</i> |
| 350           | <i>17-AAG (Tanespimycin)</i>        | <i>HSP (e.g. HSP90)</i>  | <i>0.257</i> |
| 38            | <i>Ganetespib (STA-9090)</i>        | <i>HSP (e.g. HSP90)</i>  | <i>0.29</i>  |
| 157           | <i>Ouabain</i>                      | <i>Sodium Channel</i>    | <i>0.293</i> |
| 352           | <i>CEP-18770 (Delanzomib)</i>       | <i>Proteasome</i>        | <i>0.346</i> |
| 36            | <i>SNS-032 (BMS-387032)</i>         | <i>CDK</i>               | <i>0.381</i> |
| 344           | <i>Bortezomib (PS-341)</i>          | <i>Proteasome</i>        | <i>0.382</i> |
| 14            | <i>Belinostat (PXD101)</i>          | <i>HDAC</i>              | <i>0.456</i> |
| 160           | <i>Fluvastatin Sodium</i>           | <i>HMG-CoA Reductase</i> | <i>0.46</i>  |
| 88            | <i>PD0325901</i>                    | <i>MEK</i>               | <i>0.499</i> |
| 191           | <i>PluriSln #1 (NSC 14613)</i>      | <i>Dehydrogenase</i>     | <i>0.503</i> |
| 110           | <i>TAE226 (NVP-TAE226)</i>          | <i>FAK</i>               | <i>0.515</i> |
| 163           | <i>Ifenprodil Tartrate</i>          | <i>GluR</i>              | <i>0.542</i> |
| 394           | <i>TCS 359</i>                      | <i>FLT3</i>              | <i>0.542</i> |
| 190           | <i>KX2-391</i>                      | <i>Src</i>               | <i>0.549</i> |
| 185           | <i>AZD7545</i>                      | <i>PDHK</i>              | <i>0.579</i> |
| 12            | <i>Ataluren (PTC124)</i>            | <i>CFTR</i>              | <i>0.593</i> |
| 150           | <i>BMS-707035</i>                   | <i>Integrase</i>         | <i>0.594</i> |
| 111           | <i>Ozagrel HCl</i>                  | <i>Others</i>            | <i>0.605</i> |
| 384           | <i>Birinapant</i>                   | <i>IAP</i>               | <i>0.605</i> |
| 62            | <i>OTX015</i>                       | <i>BET</i>               | <i>0.607</i> |
| 43            | <i>PNU-120596</i>                   | <i>AChR</i>              | <i>0.612</i> |
| 366           | <i>OSU-03012 (AR-12)</i>            | <i>PDK-1</i>             | <i>0.612</i> |
| 189           | <i>Pacritinib (SB1518)</i>          | <i>JAK</i>               | <i>0.613</i> |
| 63            | <i>Ibrutinib (PCI-32765)</i>        | <i>BTK</i>               | <i>0.632</i> |
| 171           | <i>SRT1720</i>                      | <i>Sirtuin</i>           | <i>0.634</i> |
| 398           | <i>T0070907</i>                     | <i>PPAR</i>              | <i>0.634</i> |

|     |                                      |                                  |       |
|-----|--------------------------------------|----------------------------------|-------|
| 91  | <i>LDN-212854</i>                    | <i>BMP</i>                       | 0.656 |
| 318 | <i>GDC-0152</i>                      | <i>IAP</i>                       | 0.657 |
| 81  | <i>AZD4547</i>                       | <i>FGFR</i>                      | 0.658 |
| 334 | <i>PF-562271</i>                     | <i>FAK</i>                       | 0.669 |
| 87  | <i>T0901317</i>                      | <i>Liver X Receptor</i>          | 0.681 |
| 242 | <i>RKI-1447</i>                      | <i>ROCK</i>                      | 0.681 |
| 198 | <i>I-BET151 (GSK1210151A)</i>        | <i>Epigenetic Reader Domain</i>  | 0.682 |
| 93  | <i>C646</i>                          | <i>Histone Acetyltransferase</i> | 0.695 |
| 159 | <i>SKI II</i>                        | <i>S1P Receptor</i>              | 0.695 |
| 181 | <i>PTC-209</i>                       | <i>BMI</i>                       | 0.696 |
| 175 | <i>2-Methoxyestradiol (2-MeOE2)</i>  | <i>HIF</i>                       | 0.698 |
| 400 | <i>SC-514</i>                        | <i>IκB/IKK</i>                   | 0.698 |
| 59  | <i>Rotundine</i>                     | <i>Dopamine Receptor</i>         | 0.707 |
| 158 | <i>Ranitidine</i>                    | <i>Histamine Receptor</i>        | 0.709 |
| 11  | <i>Tenofovir Disoproxil Fumarate</i> | <i>Reverse Transcriptase</i>     | 0.71  |
| 138 | <i>(+)-JQ1</i>                       | <i>Epigenetic Reader Domain</i>  | 0.71  |
| 358 | <i>ICG-001</i>                       | <i>Wnt/beta-catenin</i>          | 0.71  |
| 337 | <i>IMD 0354</i>                      | <i>IκB/IKK</i>                   | 0.713 |
| 25  | <i>ABT-263 (Navitoclax)</i>          | <i>Bcl-2</i>                     | 0.714 |
| 277 | <i>AVL-292</i>                       | <i>BTK</i>                       | 0.715 |
| 168 | <i>SGI-1027</i>                      | <i>DNA Methyltransferase</i>     | 0.716 |
| 26  | <i>Brinzolamide</i>                  | <i>Carbonic Anhydrase</i>        | 0.718 |
| 24  | <i>Sitaxentan sodium</i>             | <i>Endothelin Receptor</i>       | 0.722 |
| 47  | <i>SB705498</i>                      | <i>TRPV</i>                      | 0.722 |
| 368 | <i>Everolimus (RAD001)</i>           | <i>mTOR</i>                      | 0.722 |
| 261 | <i>MLN2238</i>                       | <i>Proteasome</i>                | 0.723 |
| 419 | <i>NMS-873</i>                       | <i>p97</i>                       | 0.723 |
| 282 | <i>Lovastatin</i>                    | <i>HMG-CoA Reductase</i>         | 0.728 |
| 15  | <i>Semagacestat (LY450139)</i>       | <i>Gamma-secretase</i>           | 0.729 |
| 360 | <i>SC144</i>                         | <i>Others</i>                    | 0.729 |
| 252 | <i>Varespladib (LY315920)</i>        | <i>Phospholipase (e.g. PLA)</i>  | 0.731 |

|     |                              |                                                 |       |
|-----|------------------------------|-------------------------------------------------|-------|
| 172 | 4EGI-1                       | ELF4                                            | 0.737 |
| 147 | AT101                        | Bcl-2                                           | 0.74  |
| 206 | Selumetinib (AZD6244)        | MEK                                             | 0.742 |
| 61  | PF-3845                      | FAAH                                            | 0.749 |
| 200 | Apoptosis Activator 2        | Caspase                                         | 0.753 |
| 139 | GW9662                       | PPAR                                            | 0.754 |
| 390 | Tadalafil                    | PDE                                             | 0.754 |
| 67  | WZ811                        | CXCR                                            | 0.758 |
| 370 | Aniracetam                   | AMPA Receptor-kainate<br>Receptor-NMDA Receptor | 0.758 |
| 194 | PFI-1 (PF-6405761)           | Epigenetic Reader Domain                        | 0.759 |
| 28  | Tranylcypromine (2-PCPA) HCl | Histone demethylases                            | 0.76  |
| 142 | Batimastat (BB-94)           | MMP                                             | 0.76  |
| 215 | Pralatrexate                 | DHFR                                            | 0.76  |
| 7   | Granisetron HCl              | 5-HT Receptor                                   | 0.761 |
| 356 | Ginkgolide A                 | GABA Receptor                                   | 0.761 |
| 274 | Ispinesib (SB-715992)        | Kinesin                                         | 0.769 |
| 212 | Sirtinol                     | Sirtuin                                         | 0.77  |
| 326 | CHIR-98014                   | GSK-3                                           | 0.771 |
| 22  | Rimonabant                   | Cannabinoid Receptor                            | 0.772 |
| 64  | 4E1RCat                      | ELF4                                            | 0.772 |
| 341 | Necrostatin-1                | TNF-alpha                                       | 0.773 |
| 55  | Irinotecan HCl Trihydrate    | Topoisomerase                                   | 0.774 |
| 174 | NSC 23766                    | Rac                                             | 0.776 |
| 76  | LY2157299                    | TGF-beta/Smad                                   | 0.778 |
| 126 | BIBR 1532                    | Telomerase                                      | 0.779 |
| 314 | Entacapone                   | Histone Methyltransferase                       | 0.779 |
| 133 | CP-91149                     | Phosphorylase                                   | 0.782 |
| 387 | (S)-crizotinib               | MTH                                             | 0.782 |
| 296 | BGJ398 (NVP-BGJ398)          | FGFR                                            | 0.785 |
| 127 | Thiazovivin                  | ROCK                                            | 0.787 |
| 153 | CCT128930                    | Akt                                             | 0.787 |



|     |                                     |                             |       |
|-----|-------------------------------------|-----------------------------|-------|
| 51  | <i>Aloxistatin</i>                  | <i>Cysteine protease</i>    | 0.793 |
| 146 | <i>Costunolide</i>                  | <i>Telomerase</i>           | 0.794 |
| 145 | <i>MK-1775</i>                      | <i>Wee1</i>                 | 0.797 |
| 208 | <i>PD184352 (CI-1040)</i>           | <i>MEK</i>                  | 0.797 |
| 280 | <i>Formoterol Hemifumarate</i>      | <i>Adrenergic Receptor</i>  | 0.797 |
| 29  | <i>Tandutinib (MLN518)</i>          | <i>FLT3</i>                 | 0.803 |
| 298 | <i>OSI-420</i>                      | <i>EGFR</i>                 | 0.805 |
| 312 | <i>Linagliptin</i>                  | <i>DPP-4</i>                | 0.807 |
| 207 | <i>Tolvaptan</i>                    | <i>Vasopressin Receptor</i> | 0.808 |
| 408 | <i>Isotretinoin</i>                 | <i>Hydroxylase</i>          | 0.808 |
| 108 | <i>Tyrphostin AG 879</i>            | <i>HER2</i>                 | 0.813 |
| 125 | <i>Voriconazole</i>                 | <i>P450 (e.g. CYP17)</i>    | 0.814 |
| 173 | <i>Exemestane</i>                   | <i>Aromatase</i>            | 0.814 |
| 399 | <i>Gliquidone</i>                   | <i>Potassium Channel</i>    | 0.814 |
| 58  | <i>Ferrostatin-1 (Fer-1)</i>        | <i>Ferroptosis</i>          | 0.815 |
| 254 | <i>MK-2866 (GTx-024)</i>            | <i>Androgen Receptor</i>    | 0.817 |
| 77  | <i>IPA-3</i>                        | <i>PAK</i>                  | 0.821 |
| 375 | <i>Rasagiline Mesylate</i>          | <i>MAO</i>                  | 0.821 |
| 154 | <i>Pomalidomide</i>                 | <i>TNF-alpha</i>            | 0.827 |
| 95  | <i>Mdivi-1</i>                      | <i>Dynamin</i>              | 0.829 |
| 56  | <i>SSR128129E</i>                   | <i>FGFR</i>                 | 0.833 |
| 186 | <i>URB597</i>                       | <i>FAAH</i>                 | 0.833 |
| 187 | <i>GW0742</i>                       | <i>PPAR</i>                 | 0.839 |
| 315 | <i>AG-14361</i>                     | <i>PARP</i>                 | 0.839 |
| 195 | <i>Dapagliflozin</i>                | <i>SGLT</i>                 | 0.841 |
| 402 | <i>Caffeic Acid Phenethyl Ester</i> | <i>NF-kB</i>                | 0.841 |
| 306 | <i>Tioxolone</i>                    | <i>Carbonic Anhydrase</i>   | 0.842 |
| 245 | <i>SB415286</i>                     | <i>GSK-3</i>                | 0.845 |
| 27  | <i>Nilotinib (AMN-107)</i>          | <i>Bcr-Abl</i>              | 0.846 |
| 155 | <i>AS-252424</i>                    | <i>PI3K</i>                 | 0.847 |
| 262 | <i>Org 27569</i>                    | <i>Cannabinoid Receptor</i> | 0.849 |

|     |                                             |                                  |       |
|-----|---------------------------------------------|----------------------------------|-------|
| 156 | <i>Tie2 kinase inhibitor</i>                | <i>Tie-2</i>                     | 0.851 |
| 220 | <i>Triamterene</i>                          | <i>Sodium Channel</i>            | 0.853 |
| 176 | <i>Palbociclib (PD-0332991) HCl</i>         | <i>CDK</i>                       | 0.857 |
| 335 | <i>AZD3463</i>                              | <i>ALK</i>                       | 0.863 |
| 339 | <i>TCID</i>                                 | <i>DUB</i>                       | 0.865 |
| 60  | <i>MM-102</i>                               | <i>Histone Methyltransferase</i> | 0.869 |
| 285 | <i>AZ191</i>                                | <i>Others</i>                    | 0.869 |
| 293 | <i>Ridaforolimus (Deforolimus, MK-8669)</i> | <i>mTOR</i>                      | 0.869 |
| 349 | <i>Agomelatine</i>                          | <i>5-HT Receptor</i>             | 0.869 |
| 427 | <i>GSK461364</i>                            | <i>PLK</i>                       | 0.869 |
| 37  | <i>Naltrexone HCl</i>                       | <i>Opioid Receptor</i>           | 0.871 |
| 363 | <i>Panobinostat (LBH589)</i>                | <i>HDAC</i>                      | 0.871 |
| 57  | <i>VX-765</i>                               | <i>Caspase</i>                   | 0.872 |
| 276 | <i>AZD7762</i>                              | <i>Chk</i>                       | 0.872 |
| 119 | <i>Bisoprolol fumarate</i>                  | <i>Adrenergic Receptor</i>       | 0.877 |
| 169 | <i>Atglistatin</i>                          | <i>ATGL</i>                      | 0.877 |
| 397 | <i>ML133 HCl</i>                            | <i>Potassium Channel</i>         | 0.877 |
| 78  | <i>Esomeprazole Sodium</i>                  | <i>ATPase</i>                    | 0.879 |
| 114 | <i>Piceatannol</i>                          | <i>Syk</i>                       | 0.879 |
| 219 | <i>Enalaprilat Dihydrate</i>                | <i>RAAS</i>                      | 0.88  |
| 250 | <i>PF-04217903</i>                          | <i>c-Met</i>                     | 0.882 |
| 178 | <i>PF-573228</i>                            | <i>FAK</i>                       | 0.883 |
| 16  | <i>NVP-ADW742</i>                           | <i>IGF-1R</i>                    | 0.884 |
| 23  | <i>FLI-06</i>                               | <i>Notch</i>                     | 0.885 |
| 101 | <i>Veliparib (ABT-888)</i>                  | <i>PARP</i>                      | 0.887 |
| 379 | <i>AZ 3146</i>                              | <i>Kinesin</i>                   | 0.887 |
| 19  | <i>Ilomastat (GM6001, Galardin)</i>         | <i>MMP</i>                       | 0.888 |
| 46  | <i>AZD6482</i>                              | <i>PI3K</i>                      | 0.894 |
| 270 | <i>Felodipine</i>                           | <i>Calcium Channel</i>           | 0.894 |
| 286 | <i>(-)-Parthenolide</i>                     | <i>E3 Ligase</i>                 | 0.897 |
| 92  | <i>Ki16425</i>                              | <i>LPA Receptor</i>              | 0.898 |

|     |                                  |                       |       |
|-----|----------------------------------|-----------------------|-------|
| 123 | TG100-115                        | PI3K                  | 0.899 |
| 224 | PP2                              | Src                   | 0.904 |
| 44  | Ruxolitinib (INCB018424)         | JAK                   | 0.908 |
| 331 | VU 0364770                       | GluR                  | 0.908 |
| 317 | LY411575                         | Gamma-secretase       | 0.916 |
| 184 | SGL-1776 free base               | Pim                   | 0.918 |
| 271 | (+)-Bicuculline                  | GABA Receptor         | 0.918 |
| 424 | Lomeguatrib                      | DNA Methyltransferase | 0.918 |
| 322 | Imatinib (STI571)                | PDGFR                 | 0.919 |
| 10  | Tolazoline HCl                   | Adrenergic Receptor   | 0.92  |
| 140 | KPT-185                          | CRM1                  | 0.922 |
| 222 | Fingolimod (FTY720) HCl          | S1P Receptor          | 0.922 |
| 351 | SP600125                         | JNK                   | 0.923 |
| 143 | Sertraline HCl                   | 5-HT Receptor         | 0.925 |
| 392 | Fostamatinib (R788)              | Syk                   | 0.925 |
| 247 | Torcetrapib                      | CETP                  | 0.931 |
| 327 | GW4064                           | FXR                   | 0.936 |
| 120 | Bosutinib (SKI-606)              | Src                   | 0.937 |
| 112 | Vildagliptin (LAF-237)           | DPP-4                 | 0.941 |
| 302 | Forskolin                        | cAMP                  | 0.941 |
| 96  | MRS 2578                         | P2 Receptor           | 0.945 |
| 9   | Losartan Potassium (DuP 753)     | RAAS                  | 0.947 |
| 357 | Cryptotanshinone                 | STAT                  | 0.947 |
| 295 | SNS-314 Mesylate                 | Aurora Kinase         | 0.948 |
| 428 | Gliclazide                       | Potassium Channel     | 0.948 |
| 148 | GSK690693                        | Akt                   | 0.949 |
| 90  | U0126-EtOH                       | MEK                   | 0.95  |
| 294 | LY2784544                        | JAK                   | 0.951 |
| 319 | OC000459                         | GPR                   | 0.954 |
| 246 | PRT062607 (P505-15, BIIB057) HCl | Syk                   | 0.955 |
| 284 | Lafutidine                       | Histamine Receptor    | 0.958 |

|     |                                        |                                      |       |
|-----|----------------------------------------|--------------------------------------|-------|
| 35  | <i>Atorvastatin Calcium</i>            | <i>HMG-CoA Reductase</i>             | 0.959 |
| 214 | <i>SAR131675</i>                       | <i>VEGFR</i>                         | 0.959 |
| 362 | <i>Trelagliptin</i>                    | <i>DPP-4</i>                         | 0.959 |
| 45  | <i>GW3965 HCl</i>                      | <i>Liver X Receptor</i>              | 0.96  |
| 367 | <i>GSK690693</i>                       | <i>AKT</i>                           | 0.96  |
| 188 | <i>TAK-875</i>                         | <i>GPR</i>                           | 0.963 |
| 8   | <i>A-769662</i>                        | <i>AMPK</i>                          | 0.964 |
| 290 | <i>Bazedoxifene HCl</i>                | <i>Estrogen/progestogen Receptor</i> | 0.975 |
| 227 | <i>YO-01027</i>                        | <i>Gamma-secretase</i>               | 0.976 |
| 410 | <i>VX-745</i>                          | <i>p38 MAPK</i>                      | 0.976 |
| 42  | <i>Loratadine</i>                      | <i>Histamine Receptor</i>            | 0.977 |
| 121 | <i>S3I-201</i>                         | <i>STAT</i>                          | 0.977 |
| 232 | <i>SB203580</i>                        | <i>p38 MAPK</i>                      | 0.977 |
| 234 | <i>KU-55933 (ATM Kinase Inhibitor)</i> | <i>ATM/ATR</i>                       | 0.977 |
| 99  | <i>BTB06584</i>                        | <i>Fo-ATPase</i>                     | 0.979 |
| 216 | <i>BML-190</i>                         | <i>Cannabinoid Receptor</i>          | 0.979 |
| 378 | <i>ADX-47273</i>                       | <i>GluR</i>                          | 0.979 |
| 217 | <i>TWS119</i>                          | <i>GSK-3</i>                         | 0.981 |
| 3   | <i>Fulvestrant</i>                     | <i>Estrogen/progestogen Receptor</i> | 0.982 |
| 354 | <i>Fluvoxamine maleate</i>             | <i>5-HT Receptor</i>                 | 0.982 |
| 2   | <i>Rizatriptan Benzoate</i>            | <i>5-HT Receptor</i>                 | 0.983 |
| 31  | <i>MLN8054</i>                         | <i>Aurora Kinase</i>                 | 0.983 |
| 238 | <i>TAK-700 (Orteronel)</i>             | <i>P450 (e.g. CYP17)</i>             | 0.984 |
| 205 | <i>Captopril</i>                       | <i>RAAS</i>                          | 0.99  |
| 300 | <i>Apigenin</i>                        | <i>P450 (e.g. CYP17)</i>             | 0.99  |
| 407 | <i>Etodolac</i>                        | <i>COX</i>                           | 0.99  |
| 72  | <i>Cyproterone Acetate</i>             | <i>Androgen Receptor</i>             | 0.991 |
| 321 | <i>Levosulpiride</i>                   | <i>Dopamine Receptor</i>             | 0.994 |
| 113 | <i>Dynasore</i>                        | <i>Dynamin</i>                       | 0.995 |
| 5   | <i>Ramelteon</i>                       | <i>MT Receptor</i>                   | 1.004 |
| 355 | <i>Oligomycin A</i>                    | <i>ATPase</i>                        | 1.004 |

|     |                                        |                              |       |
|-----|----------------------------------------|------------------------------|-------|
| 278 | <i>Pimobendan</i>                      | <i>PDE</i>                   | 1.011 |
| 98  | <i>LY2603618</i>                       | <i>Chk</i>                   | 1.015 |
| 53  | <i>Apixaban</i>                        | <i>Factor Xa</i>             | 1.016 |
| 301 | <i>Rigosertib (ON-01910)</i>           | <i>PLK</i>                   | 1.017 |
| 431 | <i>Go 6983</i>                         | <i>PKC</i>                   | 1.017 |
| 316 | <i>Moclobemide (Ro 111163)</i>         | <i>MAO</i>                   | 1.019 |
| 6   | <i>Tropium chloride</i>                | <i>AChR</i>                  | 1.02  |
| 149 | <i>Tropicamide</i>                     | <i>AChR</i>                  | 1.022 |
| 249 | <i>ML130 (Nodinitib-1)</i>             | <i>NOD1</i>                  | 1.023 |
| 141 | <i>Pifithrin-<math>\mu</math></i>      | <i>p53</i>                   | 1.024 |
| 267 | <i>Embelin</i>                         | <i>IAP</i>                   | 1.024 |
| 391 | <i>Elvitegravir (GS-9137, JTK-303)</i> | <i>Integrase</i>             | 1.024 |
| 422 | <i>Sal003</i>                          | <i>ELF2</i>                  | 1.024 |
| 328 | <i>PF-5274857</i>                      | <i>Hedgehog/Smoothened</i>   | 1.032 |
| 279 | <i>DBeQ</i>                            | <i>p97</i>                   | 1.034 |
| 116 | <i>Tenovin-6</i>                       | <i>p53</i>                   | 1.035 |
| 167 | <i>AGI-6780</i>                        | <i>IDH2</i>                  | 1.038 |
| 396 | <i>Naftopidil</i>                      | <i>Adrenergic Receptor</i>   | 1.038 |
| 48  | <i>Safinamide Mesylate</i>             | <i>MAO</i>                   | 1.039 |
| 304 | <i>Bupivacaine HCl</i>                 | <i>cAMP</i>                  | 1.039 |
| 221 | <i>Clemastine Fumarate</i>             | <i>Histamine Receptor</i>    | 1.043 |
| 52  | <i>NSC697923</i>                       | <i>E2</i>                    | 1.049 |
| 248 | <i>MK-2206 2HCl</i>                    | <i>Akt</i>                   | 1.049 |
| 30  | <i>Zebularine</i>                      | <i>DNA Methyltransferase</i> | 1.05  |
| 107 | <i>Finasteride</i>                     | <i>5-alpha Reductase</i>     | 1.051 |
| 269 | <i>GSK2656157</i>                      | <i>PERK</i>                  | 1.051 |
| 382 | <i>Mirabegron</i>                      | <i>Adrenergic Receptor</i>   | 1.051 |
| 423 | <i>Tariquidar</i>                      | <i>P-gp</i>                  | 1.051 |
| 50  | <i>P22077</i>                          | <i>DUB</i>                   | 1.052 |
| 204 | <i>E-64</i>                            | <i>Cathepsin K</i>           | 1.054 |
| 239 | <i>Loxistatin Acid (E-64C)</i>         | <i>Cysteine protease</i>     | 1.054 |

|     |                                         |                            |       |
|-----|-----------------------------------------|----------------------------|-------|
| 416 | <i>Ki16198</i>                          | <i>LPA Receptor</i>        | 1.054 |
| 259 | <i>KU-60019</i>                         | <i>ATM/ATR</i>             | 1.056 |
| 418 | <i>AMG-517</i>                          | <i>TRPV</i>                | 1.056 |
| 109 | <i>Cilomilast</i>                       | <i>PDE</i>                 | 1.057 |
| 383 | <i>AP26113</i>                          | <i>ALK</i>                 | 1.057 |
| 13  | <i>Candesartan</i>                      | <i>RAAS</i>                | 1.059 |
| 79  | <i>DMH1</i>                             | <i>BMP</i>                 | 1.059 |
| 80  | <i>Ozagrel</i>                          | <i>Factor Xa</i>           | 1.059 |
| 131 | <i>Bergenin</i>                         | <i>Others</i>              | 1.059 |
| 291 | <i>Golgicide A</i>                      | <i>ATPase</i>              | 1.059 |
| 359 | <i>Stattic</i>                          | <i>STAT</i>                | 1.059 |
| 376 | <i>PD128907 HCl</i>                     | <i>Dopamine Receptor</i>   | 1.059 |
| 386 | <i>LDK378</i>                           | <i>ALK</i>                 | 1.059 |
| 426 | <i>Imidapril HCl</i>                    | <i>RAAS</i>                | 1.059 |
| 130 | <i>EUK 134</i>                          | <i>Beta Amyloid</i>        | 1.06  |
| 203 | <i>Acadesine</i>                        | <i>AMPK</i>                | 1.062 |
| 406 | <i>Celecoxib</i>                        | <i>COX</i>                 | 1.062 |
| 164 | <i>KPT-276</i>                          | <i>CRM1</i>                | 1.067 |
| 287 | <i>JSH-23</i>                           | <i>NF-κB</i>               | 1.071 |
| 122 | <i>HA14-1</i>                           | <i>Bcl-2</i>               | 1.082 |
| 152 | <i>EX 527 (Selisistat)</i>              | <i>Sirtuin</i>             | 1.082 |
| 202 | <i>Bosentan Hydrate</i>                 | <i>Endothelin Receptor</i> | 1.083 |
| 307 | <i>PF-4708671</i>                       | <i>S6 Kinase</i>           | 1.085 |
| 134 | <i>Wnt-C59 (C59)</i>                    | <i>Wnt/beta-catenin</i>    | 1.086 |
| 74  | <i>GSK1292263</i>                       | <i>GPR</i>                 | 1.088 |
| 105 | <i>Iniparib (BSI-201)</i>               | <i>PARP</i>                | 1.088 |
| 381 | <i>(-)-MK 801 Maleate</i>               | <i>GluR</i>                | 1.088 |
| 20  | <i>Rivaroxaban</i>                      | <i>Factor Xa</i>           | 1.09  |
| 102 | <i>Dalcetrapib (JTT-705, RO4607381)</i> | <i>CETP</i>                | 1.091 |
| 54  | <i>ML347</i>                            | <i>BMP</i>                 | 1.092 |
| 162 | <i>Erastin</i>                          | <i>Ferroptosis</i>         | 1.093 |

|     |                                   |                                                         |       |
|-----|-----------------------------------|---------------------------------------------------------|-------|
| 253 | <i>ML161</i>                      | <i>Others</i>                                           | 1.093 |
| 258 | <i>Zosuquidar (LY335979) 3HCl</i> | <i>P-gp</i>                                             | 1.094 |
| 264 | <i>DMXAA (Vadimezan)</i>          | <i>VDA</i>                                              | 1.099 |
| 340 | <i>LB42708</i>                    | <i>Ftase</i>                                            | 1.099 |
| 342 | <i>Empagliflozin (BI 10773)</i>   | <i>SGLT</i>                                             | 1.1   |
| 177 | <i>EHop-016</i>                   | <i>Rac</i>                                              | 1.103 |
| 343 | <i>SU11274</i>                    | <i>c-Met</i>                                            | 1.105 |
| 235 | <i>CGK 733</i>                    | <i>ATM/ATR</i>                                          | 1.106 |
| 414 | <i>Mubritinib (TAK 165)</i>       | <i>HER2</i>                                             | 1.106 |
| 346 | <i>Lenalidomide (CC-5013)</i>     | <i>TNF-alpha</i>                                        | 1.107 |
| 180 | <i>Memantine HCl</i>              | <i>AMPA Receptor-kainate<br/>Receptor-NMDA Receptor</i> | 1.109 |
| 333 | <i>Daunorubicin HCl</i>           | <i>Topoisomerase II</i>                                 | 1.112 |
| 94  | <i>Oxcarbazepine</i>              | <i>Sodium Channel</i>                                   | 1.114 |
| 75  | <i>SGC 0946</i>                   | <i>Histone Methyltransferase</i>                        | 1.116 |
| 374 | <i>Rebamipide</i>                 | <i>Others</i>                                           | 1.116 |
| 213 | <i>Abitrexate (Methotrexate)</i>  | <i>DHFR</i>                                             | 1.119 |
| 199 | <i>VX-809 (Lumacaftor)</i>        | <i>CFTR</i>                                             | 1.121 |
| 404 | <i>SB431542</i>                   | <i>TGF-beta/Smad</i>                                    | 1.121 |
| 4   | <i>Tolfenamic Acid</i>            | <i>COX</i>                                              | 1.123 |
| 323 | <i>DCC-2036 (Rebastinib)</i>      | <i>Bcr-Abl</i>                                          | 1.125 |
| 100 | <i>NPS-2143</i>                   | <i>CaSR</i>                                             | 1.129 |
| 183 | <i>CK-636</i>                     | <i>Arp2/3</i>                                           | 1.13  |
| 89  | <i>PYR-41</i>                     | <i>E1 Activating</i>                                    | 1.135 |
| 210 | <i>Canagliflozin</i>              | <i>SGLT</i>                                             | 1.135 |
| 299 | <i>Dutasteride</i>                | <i>5-alpha Reductase</i>                                | 1.139 |
| 430 | <i>BI-D1870</i>                   | <i>S6 Kinase</i>                                        | 1.139 |
| 41  | <i>Pancuronium dibromide</i>      | <i>AChR</i>                                             | 1.14  |
| 209 | <i>OSI-906 (Linsitinib)</i>       | <i>IGF-1R</i>                                           | 1.14  |
| 313 | <i>Etomidate</i>                  | <i>GABA Receptor</i>                                    | 1.14  |
| 365 | <i>GDC-0941</i>                   | <i>PI3K</i>                                             | 1.14  |
| 255 | <i>Ticagrelor</i>                 | <i>P2 Receptor</i>                                      | 1.143 |

|     |                                                                       |                                      |       |
|-----|-----------------------------------------------------------------------|--------------------------------------|-------|
| 166 | <i>KPT-330</i>                                                        | <i>CRM1</i>                          | 1.145 |
| 308 | <i>5-hydroxymethyl Tolterodine (PNU 200577, 5-HMT, 5-HM)</i>          | <i>AChR</i>                          | 1.146 |
| 320 | <i>NLG919</i>                                                         | <i>IDO</i>                           | 1.148 |
| 240 | <i>Zibotentan (ZD4054)</i>                                            | <i>Endothelin Receptor</i>           | 1.149 |
| 32  | <i>PR-619</i>                                                         | <i>DUB</i>                           | 1.151 |
| 305 | <i>UNC669</i>                                                         | <i>MBT</i>                           | 1.153 |
| 283 | <i>4<math>\mu</math>8C</i>                                            | <i>Others</i>                        | 1.155 |
| 179 | <i>ABT-199 (GDC-0199)</i>                                             | <i>Bcl-2</i>                         | 1.158 |
| 197 | <i>Nebivolol</i>                                                      | <i>Adrenergic Receptor</i>           | 1.16  |
| 403 | <i>VU 0364439</i>                                                     | <i>GluR</i>                          | 1.16  |
| 336 | <i>IOX2</i>                                                           | <i>HIF</i>                           | 1.161 |
| 1   | <i>FG-4592</i>                                                        | <i>HIF</i>                           | 1.165 |
| 303 | <i>Rolipram</i>                                                       | <i>PDE</i>                           | 1.165 |
| 353 | <i>Aprepitant</i>                                                     | <i>Substance P</i>                   | 1.165 |
| 432 | <i>MNS (3,4-Methylenedioxy-<math>\beta</math>-nitrostyrene, MDBN)</i> | <i>p97</i>                           | 1.165 |
| 124 | <i>ADL5859 HCl</i>                                                    | <i>Opioid Receptor</i>               | 1.166 |
| 347 | <i>Ivacaftor (VX-770)</i>                                             | <i>CFTR</i>                          | 1.166 |
| 136 | <i>BAM7</i>                                                           | <i>Bcl-2</i>                         | 1.168 |
| 332 | <i>U-104</i>                                                          | <i>Carbonic Anhydrase</i>            | 1.168 |
| 311 | <i>Cinacalcet HCl</i>                                                 | <i>CaSR</i>                          | 1.17  |
| 17  | <i>NSC 319726</i>                                                     | <i>p53</i>                           | 1.173 |
| 144 | <i>OG-L002</i>                                                        | <i>Histone demethylases</i>          | 1.175 |
| 71  | <i>Mozavaptan</i>                                                     | <i>Vasopressin Receptor</i>          | 1.183 |
| 372 | <i>Ginkgolide B</i>                                                   | <i>PAFR</i>                          | 1.183 |
| 244 | <i>SMI-4a</i>                                                         | <i>Pim</i>                           | 1.188 |
| 18  | <i>Icotinib</i>                                                       | <i>EGFR</i>                          | 1.19  |
| 218 | <i>IKK-16 (IKK Inhibitor VII)</i>                                     | <i>I<math>\kappa</math>B/IKK</i>     | 1.195 |
| 135 | <i>NU7026</i>                                                         | <i>DNA-PK</i>                        | 1.2   |
| 388 | <i>ZM 447439</i>                                                      | <i>Aurora Kinase</i>                 | 1.2   |
| 268 | <i>Toremifene Citrate</i>                                             | <i>Estrogen/progestogen Receptor</i> | 1.201 |
| 231 | <i>VE-822</i>                                                         | <i>ATM/ATR</i>                       | 1.202 |



|     |                                      |                     |       |
|-----|--------------------------------------|---------------------|-------|
| 412 | SB408124                             | OX Receptor         | 1.202 |
| 165 | AZD2461                              | PARP                | 1.203 |
| 395 | Carvedilol                           | Adrenergic Receptor | 1.203 |
| 40  | Vemurafenib (PLX4032, RG7204)        | Raf                 | 1.208 |
| 196 | Maraviroc                            | CCR                 | 1.212 |
| 251 | GW441756                             | Trk receptor        | 1.214 |
| 338 | CRT0044876                           | APE                 | 1.215 |
| 309 | XAV-939                              | Wnt/beta-catenin    | 1.222 |
| 115 | Quizartinib (AC220)                  | FLT3                | 1.227 |
| 128 | Anastrozole                          | Aromatase           | 1.229 |
| 192 | Crenolanib (CP-868596)               | PDGFR               | 1.229 |
| 310 | SB742457                             | 5-HT Receptor       | 1.23  |
| 82  | GW9508                               | GPR                 | 1.231 |
| 325 | Nilvadipine                          | Calcium Channel     | 1.233 |
| 223 | Amlodipine                           | Calcium Channel     | 1.241 |
| 21  | STF-118804                           | Others              | 1.245 |
| 226 | Temsirolimus (CCI-779, NSC 683864)   | mTOR                | 1.249 |
| 256 | Letrozole                            | Aromatase           | 1.249 |
| 129 | SB743921                             | Kinesin             | 1.253 |
| 385 | AZD1981                              | GPR                 | 1.253 |
| 151 | Raltegravir (MK-0518)                | Integrase           | 1.259 |
| 39  | CGS 21680 HCl                        | Adenosine A2        | 1.265 |
| 364 | VX-680 (Tozasertib, MK-0457)         | Aurora Kinase       | 1.265 |
| 132 | SN-38                                | Topoisomerase       | 1.272 |
| 330 | JNJ-1661010                          | FAAH                | 1.273 |
| 97  | AGI-5198                             | Dehydrogenase       | 1.277 |
| 377 | Apatinib                             | VEGFR               | 1.277 |
| 65  | Tofacitinib (CP-690550, Tasocitinib) | JAK                 | 1.278 |
| 369 | MK-8245                              | Dehydrogenase       | 1.278 |
| 117 | Enzastaurin (LY317615)               | PKC                 | 1.283 |
| 85  | GNF-2                                | Bcr-Abl             | 1.29  |

|     |                               |                                  |       |
|-----|-------------------------------|----------------------------------|-------|
| 170 | <i>Suvorexant (MK-4305)</i>   | <i>OX Receptor</i>               | 1.293 |
| 266 | <i>AM1241</i>                 | <i>Cannabinoid Receptor</i>      | 1.3   |
| 233 | <i>EPZ-6438</i>               | <i>Histone Methyltransferase</i> | 1.308 |
| 413 | <i>H 89 2HCl</i>              | <i>PKA</i>                       | 1.308 |
| 229 | <i>PAC-1</i>                  | <i>Caspase</i>                   | 1.315 |
| 411 | <i>GSK429286A</i>             | <i>ROCK</i>                      | 1.315 |
| 236 | <i>WZ4002</i>                 | <i>EGFR</i>                      | 1.316 |
| 288 | <i>Pramipexole</i>            | <i>Dopamine Receptor</i>         | 1.319 |
| 243 | <i>UNC2250</i>                | <i>Others</i>                    | 1.322 |
| 182 | <i>Trimebutine</i>            | <i>Opioid Receptor</i>           | 1.324 |
| 193 | <i>Enzalutamide (MDV3100)</i> | <i>Androgen Receptor</i>         | 1.325 |
| 201 | <i>Naproxen</i>               | <i>COX</i>                       | 1.325 |
| 401 | <i>ZCL278</i>                 | <i>Rac</i>                       | 1.325 |
| 405 | <i>Odanacatib (MK-0822)</i>   | <i>Cathepsin K</i>               | 1.325 |
| 104 | <i>Istradefylline</i>         | <i>Others</i>                    | 1.333 |
| 66  | <i>PHA-793887</i>             | <i>CDK</i>                       | 1.337 |
| 260 | <i>LY2228820</i>              | <i>p38 MAPK</i>                  | 1.342 |
| 34  | <i>GSK1904529A</i>            | <i>IGF-1R</i>                    | 1.346 |
| 86  | <i>TPCA-1</i>                 | <i>I<math>\kappa</math>B/IKK</i> | 1.348 |
| 137 | <i>ZM 306416</i>              | <i>VEGFR</i>                     | 1.352 |
| 389 | <i>BX-912</i>                 | <i>PDK-1</i>                     | 1.352 |
| 225 | <i>CHIR-124</i>               | <i>Chk</i>                       | 1.353 |
| 409 | <i>Stavudine (d4T)</i>        | <i>Reverse Transcriptase</i>     | 1.353 |
| 297 | <i>Irinotecan</i>             | <i>Topoisomerase</i>             | 1.363 |
| 429 | <i>Sotrastaurin</i>           | <i>PKC</i>                       | 1.363 |
| 289 | <i>RepSox</i>                 | <i>TGF-beta/Smad</i>             | 1.367 |
| 425 | <i>BI 2536</i>                | <i>PLK</i>                       | 1.367 |
| 273 | <i>SANT-1</i>                 | <i>Hedgehog/Smoothened</i>       | 1.37  |
| 83  | <i>VE-821</i>                 | <i>ATM/ATR</i>                   | 1.372 |
| 272 | <i>Ticlopidine HCl</i>        | <i>P2 Receptor</i>               | 1.372 |
| 329 | <i>GDC-0068</i>               | <i>Akt</i>                       | 1.372 |

|     |                                        |                              |       |
|-----|----------------------------------------|------------------------------|-------|
| 161 | <i>Propranolol HCl</i>                 | <i>Adrenergic Receptor</i>   | 1.374 |
| 393 | <i>GSK J4 HCl</i>                      | <i>Histone demethylases</i>  | 1.374 |
| 281 | <i>CNX-774</i>                         | <i>BTK</i>                   | 1.375 |
| 106 | <i>Dabrafenib (GSK2118436)</i>         | <i>Raf</i>                   | 1.38  |
| 228 | <i>Trichostatin A (TSA)</i>            | <i>HDAC</i>                  | 1.388 |
| 49  | <i>Tenofovir</i>                       | <i>Reverse Transcriptase</i> | 1.405 |
| 324 | <i>XL335</i>                           | <i>FXR</i>                   | 1.416 |
| 263 | <i>Oxymetazoline HCl</i>               | <i>Adrenergic Receptor</i>   | 1.454 |
| 420 | <i>Sorafenib</i>                       | <i>Raf</i>                   | 1.454 |
| 257 | <i>GW2580</i>                          | <i>CSF-1R</i>                | 1.458 |
| 417 | <i>AZ20</i>                            | <i>ATM/ATR</i>               | 1.458 |
| 241 | <i>Pyrimethamine</i>                   | <i>DHFR</i>                  | 1.462 |
| 68  | <i>Allopurinol</i>                     | <i>OX Receptor</i>           | 1.463 |
| 265 | <i>Anacetrapib (MK-0859)</i>           | <i>CETP</i>                  | 1.466 |
| 421 | <i>NH125</i>                           | <i>ELF2</i>                  | 1.466 |
| 275 | <i>BTZ043 Racemate</i>                 | <i>Others</i>                | 1.482 |
| 69  | <i>HC-030031</i>                       | <i>Others</i>                | 1.488 |
| 371 | <i>Doxazosin Mesylate</i>              | <i>Adrenergic Receptor</i>   | 1.488 |
| 73  | <i>Sodium 4-Aminosalicylate</i>        | <i>NF-κB</i>                 | 1.518 |
| 373 | <i>Tosedostat (CHR2797)</i>            | <i>Aminopeptidase</i>        | 1.518 |
| 103 | <i>Vandetanib (ZD6474)</i>             | <i>VEGFR</i>                 | 1.526 |
| 380 | <i>VU 0357121</i>                      | <i>GluR</i>                  | 1.526 |
| 118 | <i>CGP 57380</i>                       | <i>MNK</i>                   | 1.53  |
| 292 | <i>LDE225 (NVP-LDE225,Erismodegib)</i> | <i>Hedgehog/Smoothened</i>   | 1.54  |
| 84  | <i>NSC 405020</i>                      | <i>MMP</i>                   | 1.559 |
| 33  | <i>Roxatidine Acetate HCl</i>          | <i>Histamine Receptor</i>    | 1.561 |
| 361 | <i>SRPIN340</i>                        | <i>Others</i>                | 1.561 |
| 237 | <i>WZ4003</i>                          | <i>AMPK</i>                  | 1.562 |
| 415 | <i>BMS-378806</i>                      | <i>gp120/CD4</i>             | 1.562 |
| 70  | <i>Telmisartan</i>                     | <i>RAAS</i>                  | 1.586 |
| 230 | <i>PHA-665752</i>                      | <i>c-Met</i>                 | 1.606 |

|     |           |       |       |
|-----|-----------|-------|-------|
| 211 | CP-673451 | PDGFR | 1.649 |
|-----|-----------|-------|-------|

**Table S6. Gene set enrichment analysis (GSEA) of T-ALL alone and T-ALL co-cultured with E4-ECs by scRNAseq**

| Pathway                         | pval       | padj       | NES        | Cluster |
|---------------------------------|------------|------------|------------|---------|
| TGF BETA SIGNALING              | 0.00332226 | 0.04152824 | -2.0737188 | EC+3119 |
| DNA REPAIR                      | 0.0210396  | 0.11688669 | 1.67919792 | EC+3119 |
| G2M CHECKPOINT                  | 0.00112486 | 0.01874766 | 2.16885049 | EC+3119 |
| APOPTOSIS                       | 0.04483188 | 0.1867995  | 1.5808908  | EC+3119 |
| ESTROGEN RESPONSE EARLY         | 0.01357466 | 0.09696186 | -1.8175447 | EC+3119 |
| APICAL SURFACE                  | 0.02800659 | 0.14003295 | 1.53024848 | EC+3119 |
| E2F TARGETS                     | 0.00107875 | 0.01874766 | 2.32648618 | EC+3119 |
| MYC TARGETS V1                  | 0.00106383 | 0.01874766 | 2.52322544 | EC+3119 |
| OXIDATIVE PHOSPHORYLATION       | 0.01651982 | 0.1032489  | 1.61324151 | EC+3119 |
| REACTIVE OXIGEN SPECIES PATHWAY | 0.0443686  | 0.1867995  | -1.5920027 | EC+3119 |
| ALLOGRAFT REJECTION             | 0.01219512 | 0.09696186 | -1.748738  | EC+3119 |
| KRAS SIGNALING UP               | 0.00816327 | 0.08163265 | -1.8670345 | EC+3119 |
| IL6 JAK STAT3 SIGNALING         | 0.00712589 | 0.08726003 | -1.995715  | EC+RO2  |
| G2M CHECKPOINT                  | 0.00143678 | 0.03591954 | 2.25327382 | EC+RO2  |
| NOTCH SIGNALING                 | 0.008726   | 0.08726003 | 1.72428132 | EC+RO2  |
| ADIPOGENESIS                    | 0.01736973 | 0.14005602 | -1.7416187 | EC+RO2  |
| E2F TARGETS                     | 0.00142045 | 0.03591954 | 2.22940136 | EC+RO2  |
| MYC TARGETS V1                  | 0.00285307 | 0.04755112 | 1.85739035 | EC+RO2  |
| INFLAMMATORY RESPONSE           | 0.03739837 | 0.20776874 | 1.63676435 | EC+RO2  |
| REACTIVE OXIGEN SPECIES PATHWAY | 0.01960784 | 0.14005602 | -1.7312182 | EC+RO2  |
| HEME METABOLISM                 | 0.0257732  | 0.16108247 | -1.6383136 | EC+RO2  |

**Table S7. Gene set enrichment analysis (GSEA) of E4-EC alone and E4-EC co-cultured with T-ALL by scRNAseq.**

| Pathway                           | pval       | padj       | NES        | cluster |
|-----------------------------------|------------|------------|------------|---------|
| TNFA SIGNALING VIA NFKB           | 0.0019802  | 0.0255102  | 2.73776348 | EC+RO2  |
| TGF BETA SIGNALING                | 0.01972387 | 0.07586102 | 1.77431491 | EC+RO2  |
| DNA REPAIR                        | 0.00992063 | 0.05544467 | -1.8530979 | EC+RO2  |
| G2M CHECKPOINT                    | 0.04417671 | 0.12993149 | 1.60936981 | EC+RO2  |
| ADIPOGENESIS                      | 0.002      | 0.0255102  | -2.1843099 | EC+RO2  |
| ESTROGEN RESPONSE EARLY           | 0.04125737 | 0.12892927 | 1.64845607 | EC+RO2  |
| INTERFERON ALPHA RESPONSE         | 0.00592885 | 0.04940711 | 2.24543835 | EC+RO2  |
| INTERFERON GAMMA RESPONSE         | 0.00197628 | 0.0255102  | 2.74300968 | EC+RO2  |
| APICAL JUNCTION                   | 0.01581028 | 0.06587615 | 1.62006251 | EC+RO2  |
| MYC TARGETS V1                    | 0.01394422 | 0.06338283 | -1.7404282 | EC+RO2  |
| EPITHELIAL MESENCHYMAL TRANSITION | 0.03571429 | 0.11904762 | -1.6097033 | EC+RO2  |
| INFLAMMATORY RESPONSE             | 0.00813008 | 0.05544467 | 2.24231977 | EC+RO2  |
| OXIDATIVE PHOSPHORYLATION         | 0.00204082 | 0.0255102  | -4.0045232 | EC+RO2  |
| REACTIVE OXIGEN SPECIES PATHWAY   | 0.00404858 | 0.04048583 | -1.9158732 | EC+RO2  |
| UV RESPONSE UP                    | 0.01209677 | 0.06048387 | 1.80350298 | EC+RO2  |
| IL2 STAT5 SIGNALING               | 0.00998004 | 0.05544467 | 1.79608545 | EC+RO2  |
| PANCREAS BETA CELLS               | 0.0240481  | 0.08588606 | -1.6509889 | EC+RO2  |
| HYPOXIA                           | 0.01688555 | 0.12357581 | -1.8388679 | EC+3119 |
| G2M CHECKPOINT                    | 0.02892562 | 0.16993802 | -1.7451539 | EC+3119 |
| ESTROGEN RESPONSE LATE            | 0.01840491 | 0.12357581 | -1.7927604 | EC+3119 |
| INTERFERON ALPHA RESPONSE         | 0.00212314 | 0.03398409 | 2.35592365 | EC+3119 |
| INTERFERON GAMMA RESPONSE         | 0.0021692  | 0.03398409 | 1.99100382 | EC+3119 |
| UNFOLDED PROTEIN RESPONSE         | 0.0392562  | 0.18450413 | -1.6724766 | EC+3119 |
| XENOBIOTIC METABOLISM             | 0.00806452 | 0.07580645 | -1.8763453 | EC+3119 |
| UV RESPONSE DN                    | 0.03653846 | 0.18450413 | -1.6976005 | EC+3119 |
| COAGULATION                       | 0.00578035 | 0.06791908 | -1.991888  | EC+3119 |
| BILE ACID METABOLISM              | 0.00189753 | 0.03398409 | 1.63361852 | EC+3119 |

**Table S8. Enriched pathways TEC vs E4-ECs.**

| Up regulated pathways<br>TEC vs. EC | Down regulated pathways<br>TEC vs. EC | Up regulated pathways E4<br>educated vs. naïve | Down regulated pathways E4<br>educated vs. naïve |
|-------------------------------------|---------------------------------------|------------------------------------------------|--------------------------------------------------|
| MYC_TARGETS_V1                      | PEROXISOME                            | ALLOGRAFT_REJECTION                            | MYC_TARGETS_V1                                   |
| E2F_TARGETS                         | BILE_ACID_METABOLISM                  | INFLAMMATORY_RESPONSE                          | REACTIVE_OXIGEN_SPECIES_PATHWAY                  |
| G2M_CHECKPOINT                      | FATTY_ACID_METABOLISM                 | TNFA_SIGNALING_VIA_NFKB                        | PROTEIN_SECRETION                                |
| EPITHELIAL_MESENCHYMAL_TRANSITION   | XENOBIOTIC_METABOLISM                 | INTERFERON_GAMMA_RESPONSE                      | ADIPOGENESIS                                     |
| GLYCOLYSIS                          |                                       | HEDGEHOG_SIGNALING                             | PEROXISOME                                       |
| MITOTIC_SPINDLE                     |                                       | WNT_BETA_CATENIN_SIGNALING                     | FATTY_ACID_METABOLISM                            |
| HYPOXIA                             |                                       | KRAS_SIGNALING_UP                              |                                                  |
| MTORC1_SIGNALING                    |                                       | IL6_JAK_STAT3_SIGNALING                        |                                                  |
| MYC_TARGETS_V2                      |                                       | G2M_CHECKPOINT                                 |                                                  |
| INFLAMMATORY_RESPONSE               |                                       | E2F_TARGETS                                    |                                                  |
| ALLOGRAFT_REJECTION                 |                                       | COMPLEMENT                                     |                                                  |
|                                     |                                       | PI3K_AKT_MTOR_SIGNALING                        |                                                  |
|                                     |                                       | SPERMATOGENESIS                                |                                                  |
|                                     |                                       | HEME_METABOLISM                                |                                                  |
|                                     |                                       | MITOTIC_SPINDLE                                |                                                  |
|                                     |                                       | ESTROGEN_RESPONSE_EARLY                        |                                                  |
|                                     |                                       | IL2_STAT5_SIGNALING                            |                                                  |
